# Supplementary material for: Distinct mitochondrial defects trigger the integrated stress response depending on the metabolic state of the cell
Source: eLife. 2020 May 28;9:e49178. doi: 10.7554/eLife.49178 (PMC7255802; doi:10.7554/eLife.49178)
Supplement: Figure 2—source data 1. [file elife-49178-fig2-data1.xlsx]

## Sheet: 1 - GSEA
Pathway	Retained pathway	Pval	Padj	ES	NES	Size	nLeadingEdge	fracLeading	Cell cycle overlap	Translation overlap	Max overlap pathway	Max overlap fraction	Leading edge genes
Metabolism of RNA	Eukaryotic Translation Initiation, rRNA modification in the nucleus and cytosol	8.95e-06	0.000111608	0.29264	1.73823	406	260	0.640394	0	0.219231	rRNA processing	0.480769	ADAR,ADAT2,ALKBH8,APOBEC1,AQR,BOP1,BUD23,BUD31,BYSL,CASC3,CD2BP2,CDK7,CHERP,CLP1,CNOT4,CPSF1,CPSF4,CSNK1E,CSTF1,CSTF2T,CTU1,CTU2,CWC22,CWC25,CWC27,DDX21,DDX39B,DDX42,DDX49,DHX37,DIMT1,DIS3,DKC1,DUS2,EBNA1BP2,EIF4A2,EIF4B,EIF4E,ELAC2,ELAVL1,EPRS,ETF1,EXOSC1,EXOSC2,EXOSC4,FBL,FCF1,FIP1L1,FTSJ3,GAR1,GEMIN5,GNL3,GTF2F1,GTF2F2,GTF2H1,GTPBP3,HBS1L,HEATR1,HNRNPC,HNRNPF,HSPB1,IGF2BP2,IMP4,ISG20L2,KRR1,LS…
Major pathway of rRNA processing in the nucleolus and cytosol	Eukaryotic Translation Initiation, rRNA modification in the nucleus and cytosol	5.45e-13	9.36e-11	0.513212	2.63911	131	119	0.908397	0	0.462185	rRNA processing	1	BMS1,BOP1,BUD23,BYSL,CSNK1E,DDX21,DDX49,DHX37,DIS3,EBNA1BP2,EXOSC1,EXOSC2,EXOSC4,FBL,FCF1,FTSJ3,GNL3,HEATR1,IMP4,ISG20L2,KRR1,LTV1,MPHOSPH10,MPHOSPH6,NCL,NIP7,NOB1,NOC4L,NOL12,NOL6,NOL9,NOP14,NOP56,NOP58,PDCD11,PES1,PNO1,PWP2,RCL1,RIOK1,RIOK2,RIOK3,RPL10,RPL10A,RPL12,RPL13A,RPL14,RPL17,RPL18,RPL18A,RPL19,RPL22,RPL22L1,RPL23,RPL23A,RPL26,RPL27A,RPL28,RPL3,RPL30,RPL32,RPL34,RPL35A,RPL36,RPL37,RPL4,…
rRNA processing in the nucleus and cytosol	Eukaryotic Translation Initiation, rRNA modification in the nucleus and cytosol	2.39e-12	3.29e-10	0.508722	2.63	140	126	0.9	0	0.436508	rRNA processing	1	BMS1,BOP1,BUD23,BYSL,CSNK1E,DDX21,DDX49,DHX37,DIMT1,DIS3,DKC1,EBNA1BP2,EXOSC1,EXOSC2,EXOSC4,FBL,FCF1,FTSJ3,GAR1,GNL3,HEATR1,IMP4,ISG20L2,KRR1,LTV1,MPHOSPH10,MPHOSPH6,NAT10,NCL,NIP7,NOB1,NOC4L,NOL12,NOL6,NOL9,NOP14,NOP2,NOP56,NOP58,PDCD11,PES1,PNO1,PWP2,RCL1,RIOK1,RIOK2,RIOK3,RPL10,RPL10A,RPL12,RPL13A,RPL14,RPL17,RPL18,RPL18A,RPL19,RPL22,RPL22L1,RPL23,RPL23A,RPL26,RPL27A,RPL28,RPL3,RPL30,RPL32,RPL…
rRNA processing	Eukaryotic Translation Initiation, rRNA modification in the nucleus and cytosol	2.83e-13	6.46e-11	0.506434	2.63845	145	130	0.896552	0	0.423077	rRNA processing in the nucleus and cytosol	0.969231	BMS1,BOP1,BUD23,BYSL,CSNK1E,DDX21,DDX49,DHX37,DIMT1,DIS3,DKC1,EBNA1BP2,ELAC2,EXOSC1,EXOSC2,EXOSC4,FBL,FCF1,FTSJ3,GAR1,GNL3,HEATR1,IMP4,ISG20L2,KRR1,LTV1,MPHOSPH10,MPHOSPH6,MRM3,NAT10,NCL,NIP7,NOB1,NOC4L,NOL12,NOL6,NOL9,NOP14,NOP2,NOP56,NOP58,NSUN4,PDCD11,PES1,PNO1,PWP2,RCL1,RIOK1,RIOK2,RIOK3,RPL10,RPL10A,RPL12,RPL13A,RPL14,RPL17,RPL18,RPL18A,RPL19,RPL22,RPL22L1,RPL23,RPL23A,RPL26,RPL27A,RPL28,RPL…
Formation of the ternary complex, and subsequently, the 43S complex	Eukaryotic Translation Initiation	0.000739734	0.00502433	0.511366	2.01283	36	34	0.944444	0	1	L13a-mediated translational silencing of Ceruloplasmin expression	1	EIF2S1,EIF2S2,EIF3A,EIF3C,EIF3D,EIF3E,EIF3F,EIF3G,EIF3H,EIF3I,EIF3K,RPS10,RPS11,RPS12,RPS13,RPS14,RPS15,RPS15A,RPS16,RPS17,RPS18,RPS19,RPS20,RPS23,RPS24,RPS27A,RPS3,RPS3A,RPS5,RPS6,RPS7,RPS8,RPS9,RPSA
Ribosomal scanning and start codon recognition	Eukaryotic Translation Initiation	0.000328832	0.0025634	0.490848	2.01789	42	39	0.928571	0	1	L13a-mediated translational silencing of Ceruloplasmin expression	1	EIF2S1,EIF2S2,EIF3A,EIF3C,EIF3D,EIF3E,EIF3F,EIF3G,EIF3H,EIF3I,EIF3K,EIF4A1,EIF4A2,EIF4B,EIF4E,EIF4H,RPS10,RPS11,RPS12,RPS13,RPS14,RPS15,RPS15A,RPS16,RPS17,RPS18,RPS19,RPS20,RPS23,RPS24,RPS27A,RPS3,RPS3A,RPS5,RPS6,RPS7,RPS8,RPS9,RPSA
Translation initiation complex formation	Eukaryotic Translation Initiation	0.00011843	0.00111292	0.51115	2.10135	42	40	0.952381	0	1	L13a-mediated translational silencing of Ceruloplasmin expression	1	EIF2S1,EIF2S2,EIF3A,EIF3C,EIF3D,EIF3E,EIF3F,EIF3G,EIF3H,EIF3I,EIF3K,EIF4A1,EIF4A2,EIF4B,EIF4E,EIF4H,PABPC1,RPS10,RPS11,RPS12,RPS13,RPS14,RPS15,RPS15A,RPS16,RPS17,RPS18,RPS19,RPS20,RPS23,RPS24,RPS27A,RPS3,RPS3A,RPS5,RPS6,RPS7,RPS8,RPS9,RPSA
Activation of the mRNA upon binding of the cap-binding complex and eIFs, and subsequent binding to 43S	Eukaryotic Translation Initiation	0.000105325	0.00100352	0.512644	2.10647	43	41	0.953488	0	1	Cap-dependent Translation Initiation	1	EIF2S1,EIF2S2,EIF3A,EIF3C,EIF3D,EIF3E,EIF3F,EIF3G,EIF3H,EIF3I,EIF3K,EIF4A1,EIF4A2,EIF4B,EIF4E,EIF4EBP1,EIF4H,PABPC1,RPS10,RPS11,RPS12,RPS13,RPS14,RPS15,RPS15A,RPS16,RPS17,RPS18,RPS19,RPS20,RPS23,RPS24,RPS27A,RPS3,RPS3A,RPS5,RPS6,RPS7,RPS8,RPS9,RPSA
Translation	Eukaryotic Translation Initiation	6.94e-06	9.34e-05	0.357584	1.94694	196	154	0.785714	0	0.5	Cap-dependent Translation Initiation	0.5	AARS,AIMP1,AIMP2,CARS,CHCHD1,DDOST,EARS2,EEF1A1,EEF1B2,EEF1D,EEF1E1,EEF1G,EEF2,EIF2B2,EIF2B3,EIF2B5,EIF2S1,EIF2S2,EIF3A,EIF3C,EIF3D,EIF3E,EIF3F,EIF3G,EIF3H,EIF3I,EIF3K,EIF4A1,EIF4A2,EIF4B,EIF4E,EIF4EBP1,EIF4H,EIF5B,EPRS,ETF1,FARSA,FARSB,GADD45GIP1,GARS,GFM2,HARS,IARS,LARS,LARS2,MARS,MARS2,MRPL1,MRPL12,MRPL13,MRPL16,MRPL17,MRPL19,MRPL21,MRPL24,MRPL3,MRPL32,MRPL37,MRPL38,MRPL4,MRPL46,MRPL47,MRPL48,…
Formation of a pool of free 40S subunits	Eukaryotic Translation Initiation	3.12e-07	1.06e-05	0.505829	2.31074	69	64	0.927536	0	1	L13a-mediated translational silencing of Ceruloplasmin expression	1	EIF3A,EIF3C,EIF3D,EIF3E,EIF3F,EIF3G,EIF3H,EIF3I,EIF3K,RPL10,RPL10A,RPL12,RPL13A,RPL14,RPL17,RPL18,RPL18A,RPL19,RPL22,RPL22L1,RPL23,RPL23A,RPL26,RPL27A,RPL28,RPL3,RPL30,RPL32,RPL34,RPL35A,RPL36,RPL37,RPL4,RPL6,RPL7,RPL8,RPL9,RPLP0,RPLP1,RPLP2,RPS10,RPS11,RPS12,RPS13,RPS14,RPS15,RPS15A,RPS16,RPS17,RPS18,RPS19,RPS20,RPS23,RPS24,RPS27A,RPS3,RPS3A,RPS5,RPS6,RPS7,RPS8,RPS9,RPSA,UBA52
GTP hydrolysis and joining of the 60S ribosomal subunit	Eukaryotic Translation Initiation	5.49e-07	1.51e-05	0.495517	2.32331	78	72	0.923077	0	1	Cap-dependent Translation Initiation	1	EIF2S1,EIF2S2,EIF3A,EIF3C,EIF3D,EIF3E,EIF3F,EIF3G,EIF3H,EIF3I,EIF3K,EIF4A1,EIF4A2,EIF4B,EIF4E,EIF4H,EIF5B,RPL10,RPL10A,RPL12,RPL13A,RPL14,RPL17,RPL18,RPL18A,RPL19,RPL22,RPL22L1,RPL23,RPL23A,RPL26,RPL27A,RPL28,RPL3,RPL30,RPL32,RPL34,RPL35A,RPL36,RPL37,RPL4,RPL6,RPL7,RPL8,RPL9,RPLP0,RPLP1,RPLP2,RPS10,RPS11,RPS12,RPS13,RPS14,RPS15,RPS15A,RPS16,RPS17,RPS18,RPS19,RPS20,RPS23,RPS24,RPS27A,RPS3,RPS3A,RP…
L13a-mediated translational silencing of Ceruloplasmin expression	Eukaryotic Translation Initiation	5.95e-08	2.72e-06	0.506035	2.36878	77	72	0.935065	0	1	Cap-dependent Translation Initiation	1	EIF2S1,EIF2S2,EIF3A,EIF3C,EIF3D,EIF3E,EIF3F,EIF3G,EIF3H,EIF3I,EIF3K,EIF4A1,EIF4A2,EIF4B,EIF4E,EIF4H,PABPC1,RPL10,RPL10A,RPL12,RPL13A,RPL14,RPL17,RPL18,RPL18A,RPL19,RPL22,RPL22L1,RPL23,RPL23A,RPL26,RPL27A,RPL28,RPL3,RPL30,RPL32,RPL34,RPL35A,RPL36,RPL37,RPL4,RPL6,RPL7,RPL8,RPL9,RPLP0,RPLP1,RPLP2,RPS10,RPS11,RPS12,RPS13,RPS14,RPS15,RPS15A,RPS16,RPS17,RPS18,RPS19,RPS20,RPS23,RPS24,RPS27A,RPS3,RPS3A,R…
Cap-dependent Translation Initiation	Eukaryotic Translation Initiation	3.7e-07	1.06e-05	0.495529	2.35283	84	77	0.916667	0	1	Eukaryotic Translation Initiation	1	EIF2B2,EIF2B3,EIF2B5,EIF2S1,EIF2S2,EIF3A,EIF3C,EIF3D,EIF3E,EIF3F,EIF3G,EIF3H,EIF3I,EIF3K,EIF4A1,EIF4A2,EIF4B,EIF4E,EIF4EBP1,EIF4H,EIF5B,PABPC1,RPL10,RPL10A,RPL12,RPL13A,RPL14,RPL17,RPL18,RPL18A,RPL19,RPL22,RPL22L1,RPL23,RPL23A,RPL26,RPL27A,RPL28,RPL3,RPL30,RPL32,RPL34,RPL35A,RPL36,RPL37,RPL4,RPL6,RPL7,RPL8,RPL9,RPLP0,RPLP1,RPLP2,RPS10,RPS11,RPS12,RPS13,RPS14,RPS15,RPS15A,RPS16,RPS17,RPS18,RPS19,R…
Eukaryotic Translation Initiation	Retain	3.7e-07	1.06e-05	0.495529	2.35283	84	77	0.916667	0	1	Cap-dependent Translation Initiation	1	EIF2B2,EIF2B3,EIF2B5,EIF2S1,EIF2S2,EIF3A,EIF3C,EIF3D,EIF3E,EIF3F,EIF3G,EIF3H,EIF3I,EIF3K,EIF4A1,EIF4A2,EIF4B,EIF4E,EIF4EBP1,EIF4H,EIF5B,PABPC1,RPL10,RPL10A,RPL12,RPL13A,RPL14,RPL17,RPL18,RPL18A,RPL19,RPL22,RPL22L1,RPL23,RPL23A,RPL26,RPL27A,RPL28,RPL3,RPL30,RPL32,RPL34,RPL35A,RPL36,RPL37,RPL4,RPL6,RPL7,RPL8,RPL9,RPLP0,RPLP1,RPLP2,RPS10,RPS11,RPS12,RPS13,RPS14,RPS15,RPS15A,RPS16,RPS17,RPS18,RPS19,R…
Influenza Viral RNA Transcription and Replication	Eukaryotic Translation Initiation	0.000402093	0.00303116	0.389061	1.87147	90	79	0.877778	0	0.696203	Influenza Life Cycle	1	GTF2F1,GTF2F2,IPO5,NUP153,NUP160,NUP188,NUP205,NUP214,NUP35,NUP43,NUP50,NUP54,NUP62,NUP98,POLR2A,POLR2C,POLR2F,POLR2G,POLR2H,RPL10,RPL10A,RPL12,RPL13A,RPL14,RPL15,RPL17,RPL18,RPL18A,RPL19,RPL22,RPL22L1,RPL23,RPL23A,RPL26,RPL27A,RPL28,RPL29,RPL3,RPL30,RPL32,RPL34,RPL35A,RPL36,RPL37,RPL4,RPL6,RPL7,RPL8,RPL9,RPLP0,RPLP1,RPLP2,RPS10,RPS11,RPS12,RPS13,RPS14,RPS15,RPS15A,RPS16,RPS17,RPS18,RPS19,RPS20,R…
Influenza Life Cycle	Eukaryotic Translation Initiation	0.00848656	0.0393364	0.33075	1.60395	97	83	0.85567	0	0.662651	Influenza Viral RNA Transcription and Replication	0.951807	CLTA,CLTC,GTF2F1,GTF2F2,IPO5,KPNA1,NUP153,NUP160,NUP188,NUP205,NUP214,NUP35,NUP43,NUP50,NUP54,NUP62,NUP98,POLR2A,POLR2C,POLR2F,POLR2G,POLR2H,RAN,RPL10,RPL10A,RPL12,RPL13A,RPL14,RPL15,RPL17,RPL18,RPL18A,RPL19,RPL22,RPL22L1,RPL23,RPL23A,RPL26,RPL27A,RPL28,RPL29,RPL3,RPL30,RPL32,RPL34,RPL35A,RPL36,RPL37,RPL4,RPL6,RPL7,RPL8,RPL9,RPLP0,RPLP1,RPLP2,RPS10,RPS11,RPS12,RPS13,RPS14,RPS15,RPS15A,RPS16,RPS17…
Nonsense Mediated Decay (NMD) enhanced by the Exon Junction Complex (EJC)	Eukaryotic Translation Initiation	8.52e-06	0.000108217	0.464373	2.16653	76	67	0.881579	0	0.835821	Nonsense-Mediated Decay (NMD)	1	CASC3,ETF1,PABPC1,PPP2CA,PPP2R2A,RNPS1,RPL10,RPL10A,RPL12,RPL13A,RPL14,RPL17,RPL18,RPL18A,RPL19,RPL22,RPL22L1,RPL23,RPL23A,RPL26,RPL27A,RPL28,RPL3,RPL30,RPL32,RPL34,RPL35A,RPL36,RPL37,RPL4,RPL6,RPL7,RPL8,RPL9,RPLP0,RPLP1,RPLP2,RPS10,RPS11,RPS12,RPS13,RPS14,RPS15,RPS15A,RPS16,RPS17,RPS18,RPS19,RPS20,RPS23,RPS24,RPS27A,RPS3,RPS3A,RPS5,RPS6,RPS7,RPS8,RPS9,RPSA,SMG1,SMG5,SMG7,SMG9,UBA52,UPF2,UPF3A
Nonsense-Mediated Decay (NMD)	Eukaryotic Translation Initiation	8.52e-06	0.000108217	0.464373	2.16653	76	67	0.881579	0	0.835821	Nonsense Mediated Decay (NMD) enhanced by the Exon Junction Complex (EJC)	1	CASC3,ETF1,PABPC1,PPP2CA,PPP2R2A,RNPS1,RPL10,RPL10A,RPL12,RPL13A,RPL14,RPL17,RPL18,RPL18A,RPL19,RPL22,RPL22L1,RPL23,RPL23A,RPL26,RPL27A,RPL28,RPL3,RPL30,RPL32,RPL34,RPL35A,RPL36,RPL37,RPL4,RPL6,RPL7,RPL8,RPL9,RPLP0,RPLP1,RPLP2,RPS10,RPS11,RPS12,RPS13,RPS14,RPS15,RPS15A,RPS16,RPS17,RPS18,RPS19,RPS20,RPS23,RPS24,RPS27A,RPS3,RPS3A,RPS5,RPS6,RPS7,RPS8,RPS9,RPSA,SMG1,SMG5,SMG7,SMG9,UBA52,UPF2,UPF3A
SRP-dependent cotranslational protein targeting to membrane	Eukaryotic Translation Initiation	3.66e-06	5.45e-05	0.475143	2.21677	76	73	0.960526	0	0.753425	Translation	0.931507	DDOST,RPL10,RPL10A,RPL12,RPL13A,RPL14,RPL15,RPL17,RPL18,RPL18A,RPL19,RPL22,RPL22L1,RPL23,RPL23A,RPL26,RPL27A,RPL28,RPL29,RPL3,RPL30,RPL32,RPL34,RPL35A,RPL36,RPL37,RPL4,RPL6,RPL7,RPL7A,RPL8,RPL9,RPLP0,RPLP1,RPLP2,RPN1,RPN2,RPS10,RPS11,RPS12,RPS13,RPS14,RPS15,RPS15A,RPS16,RPS17,RPS18,RPS19,RPS20,RPS23,RPS24,RPS25,RPS27A,RPS3,RPS3A,RPS5,RPS6,RPS7,RPS8,RPS9,RPSA,SEC11A,SEC61A1,SPCS2,SRP14,SRP19,SRP54…
Selenoamino acid metabolism	Eukaryotic Translation Initiation	1.9e-06	3.42e-05	0.481818	2.23522	75	67	0.893333	0	0.820896	Translation	0.955224	AIMP1,AIMP2,CTH,EEF1E1,EPRS,IARS,LARS,MARS,RARS,RPL10,RPL10A,RPL12,RPL13A,RPL14,RPL17,RPL18,RPL18A,RPL19,RPL22,RPL22L1,RPL23,RPL23A,RPL26,RPL27A,RPL28,RPL3,RPL30,RPL32,RPL34,RPL35A,RPL36,RPL37,RPL4,RPL6,RPL7,RPL8,RPL9,RPLP0,RPLP1,RPLP2,RPS10,RPS11,RPS12,RPS13,RPS14,RPS15,RPS15A,RPS16,RPS17,RPS18,RPS19,RPS20,RPS23,RPS24,RPS27A,RPS3,RPS3A,RPS5,RPS6,RPS7,RPS8,RPS9,RPSA,SARS,SEPSECS,TXNRD1,UBA52
Eukaryotic Translation Elongation	Eukaryotic Translation Initiation	1.53e-06	3e-05	0.51654	2.32197	64	60	0.9375	0	0.916667	Translation	1	EEF1A1,EEF1B2,EEF1D,EEF1G,EEF2,RPL10,RPL10A,RPL12,RPL13A,RPL14,RPL17,RPL18,RPL18A,RPL19,RPL22,RPL22L1,RPL23,RPL23A,RPL26,RPL27A,RPL28,RPL3,RPL30,RPL32,RPL34,RPL35A,RPL36,RPL37,RPL4,RPL6,RPL7,RPL8,RPL9,RPLP0,RPLP1,RPLP2,RPS10,RPS11,RPS12,RPS13,RPS14,RPS15,RPS15A,RPS16,RPS17,RPS18,RPS19,RPS20,RPS23,RPS24,RPS27A,RPS3,RPS3A,RPS5,RPS6,RPS7,RPS8,RPS9,RPSA,UBA52
Nonsense Mediated Decay (NMD) independent of the Exon Junction Complex (EJC)	Eukaryotic Translation Initiation	8.13e-05	0.000839848	0.480279	2.14087	62	57	0.919355	0	0.982456	Nonsense Mediated Decay (NMD) enhanced by the Exon Junction Complex (EJC)	1	ETF1,PABPC1,RPL10,RPL10A,RPL12,RPL13A,RPL14,RPL17,RPL18,RPL18A,RPL19,RPL22,RPL22L1,RPL23,RPL23A,RPL26,RPL27A,RPL28,RPL3,RPL30,RPL32,RPL34,RPL35A,RPL36,RPL37,RPL4,RPL6,RPL7,RPL8,RPL9,RPLP0,RPLP1,RPLP2,RPS10,RPS11,RPS12,RPS13,RPS14,RPS15,RPS15A,RPS16,RPS17,RPS18,RPS19,RPS20,RPS23,RPS24,RPS27A,RPS3,RPS3A,RPS5,RPS6,RPS7,RPS8,RPS9,RPSA,UBA52
Selenocysteine synthesis	Eukaryotic Translation Initiation	2.4e-06	3.92e-05	0.516355	2.2985	61	57	0.934426	0	0.964912	Selenoamino acid metabolism	1	RPL10,RPL10A,RPL12,RPL13A,RPL14,RPL17,RPL18,RPL18A,RPL19,RPL22,RPL22L1,RPL23,RPL23A,RPL26,RPL27A,RPL28,RPL3,RPL30,RPL32,RPL34,RPL35A,RPL36,RPL37,RPL4,RPL6,RPL7,RPL8,RPL9,RPLP0,RPLP1,RPLP2,RPS10,RPS11,RPS12,RPS13,RPS14,RPS15,RPS15A,RPS16,RPS17,RPS18,RPS19,RPS20,RPS23,RPS24,RPS27A,RPS3,RPS3A,RPS5,RPS6,RPS7,RPS8,RPS9,RPSA,SARS,SEPSECS,UBA52
Peptide chain elongation	Eukaryotic Translation Initiation	3.08e-06	4.8e-05	0.514938	2.29219	61	57	0.934426	0	0.964912	Eukaryotic Translation Elongation	1	EEF1A1,EEF2,RPL10,RPL10A,RPL12,RPL13A,RPL14,RPL17,RPL18,RPL18A,RPL19,RPL22,RPL22L1,RPL23,RPL23A,RPL26,RPL27A,RPL28,RPL3,RPL30,RPL32,RPL34,RPL35A,RPL36,RPL37,RPL4,RPL6,RPL7,RPL8,RPL9,RPLP0,RPLP1,RPLP2,RPS10,RPS11,RPS12,RPS13,RPS14,RPS15,RPS15A,RPS16,RPS17,RPS18,RPS19,RPS20,RPS23,RPS24,RPS27A,RPS3,RPS3A,RPS5,RPS6,RPS7,RPS8,RPS9,RPSA,UBA52
Viral mRNA Translation	Eukaryotic Translation Initiation	4.14e-06	5.91e-05	0.504735	2.23734	60	55	0.916667	0	1	Major pathway of rRNA processing in the nucleolus and cytosol	1	RPL10,RPL10A,RPL12,RPL13A,RPL14,RPL17,RPL18,RPL18A,RPL19,RPL22,RPL22L1,RPL23,RPL23A,RPL26,RPL27A,RPL28,RPL3,RPL30,RPL32,RPL34,RPL35A,RPL36,RPL37,RPL4,RPL6,RPL7,RPL8,RPL9,RPLP0,RPLP1,RPLP2,RPS10,RPS11,RPS12,RPS13,RPS14,RPS15,RPS15A,RPS16,RPS17,RPS18,RPS19,RPS20,RPS23,RPS24,RPS27A,RPS3,RPS3A,RPS5,RPS6,RPS7,RPS8,RPS9,RPSA,UBA52
Eukaryotic Translation Termination	Eukaryotic Translation Initiation	3.64e-05	0.000396102	0.481875	2.14501	61	56	0.918033	0	0.982143	Nonsense Mediated Decay (NMD) enhanced by the Exon Junction Complex (EJC)	1	ETF1,RPL10,RPL10A,RPL12,RPL13A,RPL14,RPL17,RPL18,RPL18A,RPL19,RPL22,RPL22L1,RPL23,RPL23A,RPL26,RPL27A,RPL28,RPL3,RPL30,RPL32,RPL34,RPL35A,RPL36,RPL37,RPL4,RPL6,RPL7,RPL8,RPL9,RPLP0,RPLP1,RPLP2,RPS10,RPS11,RPS12,RPS13,RPS14,RPS15,RPS15A,RPS16,RPS17,RPS18,RPS19,RPS20,RPS23,RPS24,RPS27A,RPS3,RPS3A,RPS5,RPS6,RPS7,RPS8,RPS9,RPSA,UBA52
Cell Cycle, Mitotic	Cell Cycle	2.94e-15	1.01e-12	-0.353654	-2.43203	330	156	0.472727	1	0	Cell Cycle	1	AAAS,AKT3,ALMS1,AURKB,BTRC,BUB1,BUB1B,CCNA2,CCNB2,CCND1,CCND3,CCNE1,CCNE2,CDC23,CDC25B,CDC45,CDC6,CDK2,CDKN2D,CENPC,CENPH,CENPI,CENPJ,CENPK,CENPL,CENPM,CENPS,CENPU,CEP164,CEP250,CEP70,CEP72,CEP76,CNEP1R1,CNTRL,DHFR,DNA2,DYNLL1,E2F2,E2F6,ERCC6L,ESCO2,FBXO5,FEN1,FOXM1,GINS1,GINS2,GINS3,GMNN,GTSE1,H2AFV,H3F3A,HAUS1,HAUS3,HAUS4,HAUS5,HAUS6,HAUS8,HDAC1,HIST1H2AB,HIST1H2AE,HIST1H2BN,HIST1H3A,HIST1H3B,H…
Cell Cycle	Retain	1.31e-16	8.96e-14	-0.345959	-2.41639	380	177	0.465789	1	0	Cell Cycle, Mitotic	0.881356	AAAS,AKT3,ALMS1,AURKB,BABAM1,BRCA1,BRIP1,BTRC,BUB1,BUB1B,CCNA2,CCNB2,CCND1,CCND3,CCNE1,CCNE2,CDC23,CDC25B,CDC45,CDC6,CDK2,CDKN2D,CENPC,CENPH,CENPI,CENPJ,CENPK,CENPL,CENPM,CENPS,CENPU,CENPX,CEP164,CEP250,CEP70,CEP72,CEP76,CHEK2,CLSPN,CNEP1R1,CNTRL,DHFR,DIDO1,DNA2,DYNLL1,E2F2,E2F6,ERCC6L,ESCO2,EXO1,FBXO5,FEN1,FOXM1,GINS1,GINS2,GINS3,GMNN,GTSE1,H2AFV,H3F3A,HAUS1,HAUS3,HAUS4,HAUS5,HAUS6,HAUS8,HDAC1,H…
Mitotic Prometaphase	Cell Cycle	1.78e-08	1.11e-06	-0.391151	-2.36439	124	79	0.637097	0.810127	0	M Phase	0.810127	ALMS1,AURKB,BIRC5,BUB1,BUB1B,CCNB2,CCP110,CDC20,CENPA,CENPC,CENPE,CENPF,CENPH,CENPI,CENPJ,CENPK,CENPL,CENPM,CENPS,CENPU,CEP135,CEP164,CEP192,CEP250,CEP70,CEP72,CEP76,CETN2,CNTRL,DYNLL1,DYNLL2,ERCC6L,HAUS1,HAUS3,HAUS4,HAUS5,HAUS6,HAUS8,KIF18A,KIF2C,KNL1,MAD2L1,MZT2A,NCAPG,NCAPH,NDC80,NDE1,NEDD1,NINL,NME7,NUF2,NUP133,NUP85,PCNT,PLK1,PPP2R1B,PRKACA,PRKAR2B,RAD21,SGO2,SKA1,SMC2,SMC3,SMC4,SPC24,SPC25,…
M Phase	Cell Cycle	3.04e-09	2.6e-07	-0.327572	-2.10598	225	100	0.444444	1	0	Cell Cycle	1	AAAS,ALMS1,AURKB,BUB1,BUB1B,CCNB2,CDC23,CENPC,CENPH,CENPI,CENPJ,CENPK,CENPL,CENPM,CENPS,CENPU,CEP164,CEP250,CEP70,CEP72,CEP76,CNEP1R1,CNTRL,DYNLL1,ERCC6L,FBXO5,H2AFV,H3F3A,HAUS1,HAUS3,HAUS4,HAUS5,HAUS6,HAUS8,HIST1H2AB,HIST1H2AE,HIST1H2BN,HIST1H3A,HIST1H3B,HIST1H3C,HIST1H3E,HIST1H3F,HIST1H3G,HIST1H3I,HIST1H4D,HIST1H4I,HIST1H4J,HIST2H3A,KIF18A,KIF20A,KIF23,KIF2C,KNL1,MAD2L1,MAPK3,MASTL,MZT2A,NCAPD3…
Cell Cycle Checkpoints	Cell Cycle	1.53e-09	1.5e-07	-0.379557	-2.37145	160	66	0.4125	1	0	Cell Cycle	1	AURKB,BRCA1,BRIP1,BUB1,BUB1B,CCNA2,CCNB2,CCNE1,CCNE2,CDC23,CDC45,CDC6,CDK2,CENPC,CENPH,CENPI,CENPK,CENPL,CENPM,CENPS,CENPU,CHEK2,CLSPN,DNA2,DYNLL1,ERCC6L,EXO1,GTSE1,HIST1H4D,HIST1H4I,HIST1H4J,KIF18A,KIF2C,MAD2L1,MCM2,MCM3,MCM4,MCM5,MCM6,MCM7,NDC80,NDE1,NUF2,NUP85,ORC1,PLK1,PPP2R1B,PSMB2,PSMD1,PSMD2,PSME1,PSME4,RFC2,RFC3,RFC5,RPA1,RPA2,RPA3,SGO2,SKA1,SPC24,SPC25,TOP3A,TOPBP1,WRN,XPO1
RHO GTPase Effectors	Cell Cycle	0.00166029	0.00963288	-0.257711	-1.60077	157	64	0.407643	0.78125	0	Signaling by Rho GTPases	1	ABI2,AR,ARPC1A,AURKB,BAIAP2,BUB1,BUB1B,CALM3,CENPC,CENPH,CENPI,CENPK,CENPL,CENPM,CENPS,CENPU,CIT,DYNLL1,ERCC6L,EVL,FMNL3,H2AFV,H3F3A,HIST1H2AB,HIST1H2AE,HIST1H2BN,HIST1H3A,HIST1H3B,HIST1H3C,HIST1H3E,HIST1H3F,HIST1H3G,HIST1H3I,HIST1H4D,HIST1H4I,HIST1H4J,HIST2H3A,KIF18A,KIF2C,KNL1,MAD2L1,MAPK3,MEN1,NDC80,NDE1,NUF2,NUP133,NUP85,PAK3,PFN2,PIK3C3,PLK1,PPP2R1B,RTKN,SGO2,SKA1,SPC24,SPC25,TAX1BP3,TUBA1A,…
Signaling by Rho GTPases	Cell Cycle	8.42e-05	0.000839848	-0.257099	-1.63933	201	82	0.40796	0.609756	0	RHO GTPase Effectors	0.780488	ABI2,AR,ARHGAP18,ARHGAP19,ARHGAP22,ARHGAP32,ARHGDIB,ARHGEF19,ARHGEF40,ARPC1A,AURKB,BAIAP2,BUB1,BUB1B,CALM3,CENPC,CENPH,CENPI,CENPK,CENPL,CENPM,CENPS,CENPU,CIT,DEPDC1B,DEPDC7,DYNLL1,ECT2,ERCC6L,EVL,FMNL3,GMIP,H2AFV,H3F3A,HIST1H2AB,HIST1H2AE,HIST1H2BN,HIST1H3A,HIST1H3B,HIST1H3C,HIST1H3E,HIST1H3F,HIST1H3G,HIST1H3I,HIST1H4D,HIST1H4I,HIST1H4J,HIST2H3A,ITSN1,KIF18A,KIF2C,KNL1,MAD2L1,MAPK3,MEN1,NDC80,ND…
Mitotic Spindle Checkpoint	Cell Cycle	0.000569219	0.00409949	-0.352256	-1.86693	69	28	0.405797	1	0	Mitotic Anaphase	1	AURKB,BUB1,BUB1B,CDC23,CENPC,CENPH,CENPI,CENPK,CENPL,CENPM,CENPS,CENPU,DYNLL1,ERCC6L,KIF18A,KIF2C,MAD2L1,NDC80,NDE1,NUF2,NUP85,PLK1,PPP2R1B,SGO2,SKA1,SPC24,SPC25,XPO1
Amplification of signal from unattached kinetochores via a MAD2 inhibitory signal	Cell Cycle	0.000133393	0.00120404	-0.397949	-2.07975	60	27	0.45	1	0	RHO GTPase Effectors	1	AURKB,BUB1,BUB1B,CENPC,CENPH,CENPI,CENPK,CENPL,CENPM,CENPS,CENPU,DYNLL1,ERCC6L,KIF18A,KIF2C,MAD2L1,NDC80,NDE1,NUF2,NUP85,PLK1,PPP2R1B,SGO2,SKA1,SPC24,SPC25,XPO1
Amplification of signal from the kinetochores	Cell Cycle	0.000133393	0.00120404	-0.397949	-2.07975	60	27	0.45	1	0	RHO GTPase Effectors	1	AURKB,BUB1,BUB1B,CENPC,CENPH,CENPI,CENPK,CENPL,CENPM,CENPS,CENPU,DYNLL1,ERCC6L,KIF18A,KIF2C,MAD2L1,NDC80,NDE1,NUF2,NUP85,PLK1,PPP2R1B,SGO2,SKA1,SPC24,SPC25,XPO1
Resolution of Sister Chromatid Cohesion	Cell Cycle	9.34e-05	0.000902153	-0.373449	-2.03538	75	41	0.546667	0.902439	0	Mitotic Prometaphase	1	AURKB,BUB1,BUB1B,CCNB2,CENPA,CENPC,CENPH,CENPI,CENPK,CENPL,CENPM,CENPS,CENPU,DYNLL1,DYNLL2,ERCC6L,KIF18A,KIF2C,KNL1,MAD2L1,NDC80,NDE1,NUF2,NUP133,NUP85,PLK1,PPP2R1B,RAD21,SGO2,SKA1,SMC3,SPC24,SPC25,STAG1,TUBA1A,TUBA1B,TUBA1C,TUBA4A,TUBB4B,XPO1,ZWINT
Mitotic Metaphase and Anaphase	Cell Cycle	0.000924524	0.00604022	-0.290985	-1.73857	120	40	0.333333	1	0	M Phase	1	AURKB,BUB1,BUB1B,CDC23,CENPC,CENPH,CENPI,CENPK,CENPL,CENPM,CENPS,CENPU,DYNLL1,ERCC6L,FBXO5,KIF18A,KIF2C,MAD2L1,NDC80,NDE1,NUF2,NUP85,PLK1,PPP2R1B,PSMB2,PSMD1,PSMD2,PSME1,PSME4,PTTG1,SGO2,SKA1,SMC3,SPC24,SPC25,TUBA1A,TUBA1B,TUBB4B,VRK2,XPO1
Separation of Sister Chromatids	Cell Cycle	0.00167101	0.00963288	-0.298302	-1.7594	111	38	0.342342	1	0	Mitotic Anaphase	1	AURKB,BUB1,BUB1B,CDC23,CENPC,CENPH,CENPI,CENPK,CENPL,CENPM,CENPS,CENPU,DYNLL1,ERCC6L,KIF18A,KIF2C,MAD2L1,NDC80,NDE1,NUF2,NUP85,PLK1,PPP2R1B,PSMB2,PSMD1,PSMD2,PSME1,PSME4,PTTG1,SGO2,SKA1,SMC3,SPC24,SPC25,TUBA1A,TUBA1B,TUBB4B,XPO1
Mitotic Anaphase	Cell Cycle	0.00152552	0.0089445	-0.283825	-1.68898	119	39	0.327731	1	0	Mitotic Metaphase and Anaphase	1	AURKB,BUB1,BUB1B,CDC23,CENPC,CENPH,CENPI,CENPK,CENPL,CENPM,CENPS,CENPU,DYNLL1,ERCC6L,KIF18A,KIF2C,MAD2L1,NDC80,NDE1,NUF2,NUP85,PLK1,PPP2R1B,PSMB2,PSMD1,PSMD2,PSME1,PSME4,PTTG1,SGO2,SKA1,SMC3,SPC24,SPC25,TUBA1A,TUBA1B,TUBB4B,VRK2,XPO1
Cilium Assembly	Retain	3.79e-06	5.53e-05	-0.361046	-2.12026	108	66	0.611111	0.393939	0	Organelle biogenesis and maintenance	1	ALMS1,ARL6,ASAP1,ATAT1,BBS10,BBS12,BBS2,BBS7,BBS9,C2CD3,CC2D2A,CCP110,CENPJ,CEP135,CEP164,CEP192,CEP250,CEP70,CEP72,CEP76,CEP97,CETN2,CNTRL,DYNLL1,DYNLL2,EXOC2,EXOC6,HAUS1,HAUS3,HAUS4,HAUS5,HAUS6,HAUS8,HDAC6,IFT20,IFT27,IFT46,IFT74,KIF24,NDE1,NEDD1,NINL,PCNT,PLK1,PRKACA,PRKAR2B,RP2,RPGRIP1L,SEPT2,TCTN2,TCTN3,TMEM216,TMEM67,TRAF3IP1,TTC21B,TTC30A,TTC30B,TTC8,TUBA1A,TUBA1B,TUBA1C,TUBA4A,TUBB,TUBB4B…
Organelle biogenesis and maintenance	Cilium Assembly	0.00287408	0.0149365	-0.253266	-1.56414	149	77	0.516779	0.337662	0	Cilium Assembly	0.857143	ALMS1,APOO,APOOL,ARL6,ASAP1,ATAT1,ATP5MC3,ATP5ME,BBS10,BBS12,BBS2,BBS7,BBS9,C2CD3,CALM3,CC2D2A,CCP110,CENPJ,CEP135,CEP164,CEP192,CEP250,CEP70,CEP72,CEP76,CEP97,CETN2,CHD9,CNTRL,DYNLL1,DYNLL2,EXOC2,EXOC6,HAUS1,HAUS3,HAUS4,HAUS5,HAUS6,HAUS8,HDAC6,IDH2,IFT20,IFT27,IFT46,IFT74,KIF24,MT-ATP8,NCOA2,NDE1,NEDD1,NINL,PCNT,PLK1,PRKACA,PRKAG2,PRKAR2B,RP2,RPGRIP1L,SEPT2,TBL1XR1,TCTN2,TCTN3,TMEM216,TMEM67,TRA…
Recruitment of NuMA to mitotic centrosomes	Cell Cycle	0.000732506	0.00502433	-0.374379	-1.95154	59	38	0.644068	0.815789	0	Mitotic Prometaphase	1	ALMS1,CCP110,CENPJ,CEP135,CEP164,CEP192,CEP250,CEP70,CEP72,CEP76,CETN2,CNTRL,DYNLL1,HAUS1,HAUS3,HAUS4,HAUS5,HAUS6,HAUS8,MZT2A,NDE1,NEDD1,NINL,NME7,PCNT,PLK1,PRKACA,PRKAR2B,TUBA1A,TUBA1B,TUBA1C,TUBA4A,TUBB,TUBB4B,TUBG1,TUBGCP4,TUBGCP5,TUBGCP6
Centrosome maturation	Cell Cycle	8.45e-05	0.000839848	-0.419025	-2.10103	53	40	0.754717	0.725	0	Recruitment of mitotic centrosome proteins and complexes	1	ALMS1,CCP110,CDK1,CENPJ,CEP135,CEP164,CEP192,CEP250,CEP70,CEP72,CEP76,CETN2,CNTRL,DYNLL1,HAUS1,HAUS3,HAUS4,HAUS5,HAUS6,HAUS8,MZT2A,NDE1,NEDD1,NEK2,NINL,NME7,PCM1,PCNT,PLK1,PRKACA,PRKAR2B,SSNA1,TUBA1A,TUBA4A,TUBB,TUBB4B,TUBG1,TUBGCP4,TUBGCP5,TUBGCP6
Recruitment of mitotic centrosome proteins and complexes	Cell Cycle	8.45e-05	0.000839848	-0.419025	-2.10103	53	40	0.754717	0.725	0	Centrosome maturation	1	ALMS1,CCP110,CDK1,CENPJ,CEP135,CEP164,CEP192,CEP250,CEP70,CEP72,CEP76,CETN2,CNTRL,DYNLL1,HAUS1,HAUS3,HAUS4,HAUS5,HAUS6,HAUS8,MZT2A,NDE1,NEDD1,NEK2,NINL,NME7,PCM1,PCNT,PLK1,PRKACA,PRKAR2B,SSNA1,TUBA1A,TUBA4A,TUBB,TUBB4B,TUBG1,TUBGCP4,TUBGCP5,TUBGCP6
Anchoring of the basal body to the plasma membrane	Cilium Assembly	7.6e-05	0.000801684	-0.409426	-2.14035	61	46	0.754098	0.521739	0	Organelle biogenesis and maintenance	0.891304	ALMS1,C2CD3,CC2D2A,CCP110,CDK1,CENPJ,CEP135,CEP164,CEP192,CEP250,CEP70,CEP72,CEP76,CEP89,CEP97,CETN2,CNTRL,DYNLL1,HAUS1,HAUS3,HAUS4,HAUS5,HAUS6,HAUS8,KIF24,NDE1,NEDD1,NEK2,NINL,PCM1,PCNT,PLK1,PRKACA,PRKAR2B,RPGRIP1L,SEPT2,SSNA1,TCTN2,TCTN3,TMEM216,TMEM67,TUBA1A,TUBA4A,TUBB,TUBB4B,TUBG1
AURKA Activation by TPX2	Cell Cycle	0.000964161	0.00623976	-0.397873	-1.93412	49	36	0.734694	0.694444	0	Loss of Nlp from mitotic centrosomes	0.972222	ALMS1,CCP110,CDK1,CENPJ,CEP135,CEP164,CEP192,CEP250,CEP70,CEP72,CEP76,CETN2,CNTRL,DYNLL1,HAUS1,HAUS3,HAUS4,HAUS5,HAUS6,HAUS8,HMMR,NDE1,NEDD1,NEK2,NINL,PCM1,PCNT,PLK1,PRKACA,PRKAR2B,SSNA1,TUBA1A,TUBA4A,TUBB,TUBB4B,TUBG1
Loss of Nlp from mitotic centrosomes	Cell Cycle	0.000852007	0.00561997	-0.406303	-1.96454	47	35	0.744681	0.685714	0	AURKA Activation by TPX2	1	ALMS1,CCP110,CDK1,CENPJ,CEP135,CEP164,CEP192,CEP250,CEP70,CEP72,CEP76,CETN2,CNTRL,DYNLL1,HAUS1,HAUS3,HAUS4,HAUS5,HAUS6,HAUS8,NDE1,NEDD1,NEK2,NINL,PCM1,PCNT,PLK1,PRKACA,PRKAR2B,SSNA1,TUBA1A,TUBA4A,TUBB,TUBB4B,TUBG1
Loss of proteins required for interphase microtubule organization from the centrosome	Cell Cycle	0.000852007	0.00561997	-0.406303	-1.96454	47	35	0.744681	0.685714	0	AURKA Activation by TPX2	1	ALMS1,CCP110,CDK1,CENPJ,CEP135,CEP164,CEP192,CEP250,CEP70,CEP72,CEP76,CETN2,CNTRL,DYNLL1,HAUS1,HAUS3,HAUS4,HAUS5,HAUS6,HAUS8,NDE1,NEDD1,NEK2,NINL,PCM1,PCNT,PLK1,PRKACA,PRKAR2B,SSNA1,TUBA1A,TUBA4A,TUBB,TUBB4B,TUBG1
rRNA modification in the nucleus and cytosol	Retain	8.81e-07	2.09e-05	0.552095	2.37636	51	40	0.784314	0	0.075	rRNA processing	1	DDX49,DHX37,DIMT1,DKC1,FBL,FCF1,GAR1,HEATR1,IMP4,KRR1,MPHOSPH10,NAT10,NOC4L,NOL6,NOP14,NOP2,NOP56,NOP58,PDCD11,PNO1,PWP2,RPS14,RPS6,RPS7,RRP36,RRP9,TBL3,THUMPD1,TSR3,UTP11,UTP14A,UTP15,UTP18,UTP20,UTP25,UTP4,UTP6,WDR3,WDR43,WDR75
Interleukin-7 signaling	Cell Cycle, Signaling by WNT	0.000154724	0.00134355	-0.617311	-2.32704	19	14	0.736842	0.571429	0	Signaling by Rho GTPases	0.642857	HGF,HIST1H3A,HIST1H3B,HIST1H3C,HIST1H3E,HIST1H3F,HIST1H3G,HIST1H3I,HIST2H3A,IL7,IRS1,PIK3R2,PIK3R3,STAT5A
DNA Damage/Telomere Stress Induced Senescence	Cell Cycle, DNA Repair	0.000205576	0.00167887	-0.525206	-2.21268	28	16	0.571429	0.6875	0	Cellular responses to stress	0.9375	CCNA2,CCNE1,CCNE2,CDK2,H2AFV,HIST1H1A,HIST1H1B,HIST1H1C,HIST1H1D,HIST1H1E,HIST1H2AB,HIST1H2AE,HIST1H2BN,HIST1H4D,HIST1H4I,HIST1H4J
Deposition of new CENPA-containing nucleosomes at the centromere	Cell Cycle	3.39e-07	1.06e-05	-0.617022	-2.62071	29	24	0.827586	0.916667	0	Nucleosome assembly	1	CENPA,CENPC,CENPH,CENPI,CENPK,CENPL,CENPM,CENPS,CENPU,CENPW,CENPX,H2AFV,HIST1H2AB,HIST1H2AE,HIST1H2BN,HIST1H4D,HIST1H4I,HIST1H4J,KNL1,MIS18A,MIS18BP1,OIP5,RBBP7,SMARCA5
Nucleosome assembly	Cell Cycle	3.39e-07	1.06e-05	-0.617022	-2.62071	29	24	0.827586	0.916667	0	Deposition of new CENPA-containing nucleosomes at the centromere	1	CENPA,CENPC,CENPH,CENPI,CENPK,CENPL,CENPM,CENPS,CENPU,CENPW,CENPX,H2AFV,HIST1H2AB,HIST1H2AE,HIST1H2BN,HIST1H4D,HIST1H4I,HIST1H4J,KNL1,MIS18A,MIS18BP1,OIP5,RBBP7,SMARCA5
Switching of origins to a post-replicative state	Cell Cycle	0.0017816	0.0101006	-0.368668	-1.85005	54	19	0.351852	1	0	S Phase	1	CCNA2,CCNE1,CCNE2,CDC23,CDC6,CDK2,MCM2,MCM3,MCM4,MCM5,MCM6,MCM7,ORC1,PSMB2,PSMD1,PSMD2,PSME1,PSME4,SKP2
Assembly of the pre-replicative complex	Cell Cycle	0.00757043	0.0355706	-0.384945	-1.80283	41	15	0.365854	1	0	DNA Replication Pre-Initiation	1	CDC6,E2F2,GMNN,MCM2,MCM3,MCM4,MCM5,MCM6,MCM7,ORC1,PSMB2,PSMD1,PSMD2,PSME1,PSME4
Orc1 removal from chromatin	Cell Cycle	0.0055908	0.0272006	-0.376101	-1.77747	43	16	0.372093	1	0	Switching of origins to a post-replicative state	1	CCNA2,CDC6,CDK2,MCM2,MCM3,MCM4,MCM5,MCM6,MCM7,ORC1,PSMB2,PSMD1,PSMD2,PSME1,PSME4,SKP2
Apoptotic execution phase	Apoptosis	0.000413182	0.0030809	-0.50826	-2.14129	28	14	0.5	0.0714286	0	Apoptosis	0.928571	ADD1,CASP3,CASP6,CASP8,CLSPN,DFFA,HIST1H1A,HIST1H1B,HIST1H1C,HIST1H1D,HIST1H1E,HMGB1,HMGB2,TJP2
Apoptosis	Retain	0.00279121	0.0146166	-0.312516	-1.74838	82	26	0.317073	0.269231	0	Programmed Cell Death	1	ADD1,AKT3,BAD,BCL2L11,CASP3,CASP6,CASP8,CASP9,CLSPN,DAPK2,DFFA,DYNLL1,HIST1H1A,HIST1H1B,HIST1H1C,HIST1H1D,HIST1H1E,HMGB1,MAGED1,PSMB2,PSMD1,PSMD2,PSME4,TJP2,TLR4,XIAP
Programmed Cell Death	Apoptosis	0.00295754	0.0152547	-0.315756	-1.78548	84	27	0.321429	0.259259	0	Apoptosis	0.962963	ADD1,AKT3,BAD,BCL2L11,CASP3,CASP6,CASP8,CASP9,CLSPN,DAPK2,DFFA,DYNLL1,HIST1H1A,HIST1H1B,HIST1H1C,HIST1H1D,HIST1H1E,HMGB1,MAGED1,PSMB2,PSMD1,PSMD2,PSME4,RIPK3,TJP2,TLR4,XIAP
tRNA modification in the nucleus and cytosol	tRNA processing	0.00190243	0.0106973	0.545891	1.94478	24	14	0.583333	0	0	tRNA processing	1	CTU1,CTU2,EPRS,METTL1,NSUN2,PUS1,QTRT1,QTRT2,TP53RK,TRIT1,TRMT1,TRMT6,TRMT61A,WDR4
tRNA processing	Retain	0.00119581	0.00745748	0.419036	1.89242	65	27	0.415385	0	0	Metabolism of RNA	1	CPSF4,CTU1,CTU2,ELAC2,EPRS,METTL1,NSUN2,NUP188,NUP54,NUP98,PUS1,QTRT1,QTRT2,RPP14,RPP38,RTCB,TP53RK,TPR,TRIT1,TRMT1,TRMT6,TRMT61A,TRMT61B,TRNT1,TSEN54,WDR4,XPOT
Resolution of D-loop Structures through Synthesis-Dependent Strand Annealing (SDSA)	Cell Cycle, DNA Repair	0.00266545	0.0141796	-0.558023	-1.96755	16	11	0.6875	0.636364	0	DNA Repair	1	BRCA1,BRIP1,DNA2,EXO1,RAD51C,RAD51D,RTEL1,TOP3A,WRN,XRCC2,XRCC3
Resolution of D-loop Structures through Holliday Junction Intermediates	Cell Cycle, DNA Repair	0.00202735	0.0111791	-0.548467	-2.04043	18	12	0.666667	0.583333	0	DNA Repair	1	BRCA1,BRIP1,DNA2,EME1,EXO1,GEN1,RAD51C,RAD51D,TOP3A,WRN,XRCC2,XRCC3
Resolution of D-Loop Structures	Cell Cycle, DNA Repair	0.0021144	0.0115117	-0.557938	-2.10323	19	13	0.684211	0.538462	0	DNA Repair	1	BRCA1,BRIP1,DNA2,EME1,EXO1,GEN1,RAD51C,RAD51D,RTEL1,TOP3A,WRN,XRCC2,XRCC3
Metabolism of steroids	Cholsesterol biosynthesis	3.91e-09	2.98e-07	-0.508667	-2.69856	68	21	0.308824	0	0	Regulation of cholesterol biosynthesis by SREBP (SREBF)	0.666667	ACAT2,CYP51A1,DHCR24,DHCR7,ELOVL6,FDFT1,HMGCR,HMGCS1,HSD17B7,IDI1,INSIG1,LSS,MVD,NSDHL,OSBPL3,SC5D,SCD,SRD5A1,SREBF1,STARD4,TBL1XR1
Cholesterol biosynthesis	Retain	7.92e-10	9.06e-08	-0.758798	-2.97677	22	14	0.636364	0	0	Metabolism of steroids	0.928571	ACAT2,CYP51A1,DHCR24,DHCR7,FDFT1,HMGCR,HMGCS1,HSD17B7,IDI1,LSS,MVD,MVK,NSDHL,SC5D
Activation of gene expression by SREBF (SREBP)	Cholsesterol biosynthesis	5.83e-08	2.72e-06	-0.640579	-2.76457	31	13	0.419355	0	0	Metabolism of steroids	1	CYP51A1,DHCR7,ELOVL6,FDFT1,HMGCR,HMGCS1,IDI1,LSS,MVD,SC5D,SCD,SREBF1,TBL1XR1
Regulation of cholesterol biosynthesis by SREBP (SREBF)	Cholsesterol biosynthesis	2.61e-08	1.44e-06	-0.600417	-2.74698	39	14	0.358974	0	0	Metabolism of steroids	1	CYP51A1,DHCR7,ELOVL6,FDFT1,HMGCR,HMGCS1,IDI1,INSIG1,LSS,MVD,SC5D,SCD,SREBF1,TBL1XR1
Cytosolic tRNA aminoacylation	Retain	2.72e-08	1.44e-06	0.730288	2.5696	23	16	0.695652	0	0	tRNA Aminoacylation	1	AARS,AIMP2,CARS,EEF1E1,EPRS,GARS,IARS,LARS,MARS,NARS,RARS,SARS,TARS,VARS,WARS,YARS
tRNA Aminoacylation	Cytosolic tRNA aminoacylation	0.000178145	0.00149033	0.5514	2.10511	32	18	0.5625	0	0	Translation	1	AARS,AIMP2,CARS,EEF1E1,EPRS,GARS,IARS,LARS,LARS2,MARS,NARS,NARS2,RARS,SARS,TARS,VARS,WARS,YARS
Ca2+ pathway	Cell Cycle, Signaling by WNT	0.000985386	0.00631752	-0.533113	-2.05309	21	14	0.666667	0	0	Signaling by WNT	0.857143	AGO1,CALM3,FZD2,FZD3,FZD6,GNAO1,GNB4,GNG11,GNG2,MOV10,TCF7L1,TCF7L2,TNRC6A,TNRC6B
Class A/1 (Rhodopsin-like receptors)	GPCR ligand binding	0.00640224	0.0307129	-0.41747	-1.80938	32	16	0.5	0	0	GPCR ligand binding	1	APLN,AVPR1A,C3AR1,CX3CL1,CXCL12,CXCL5,CXCR4,CXCR6,GPER1,GPR39,LPAR1,LPAR2,PROKR1,PTGER4,S1PR2,S1PR3
GPCR ligand binding	Retain	0.0014661	0.00882231	-0.393917	-1.90466	47	23	0.489362	0	0	Class A/1 (Rhodopsin-like receptors)	0.695652	ADGRE5,APLN,AVPR1A,C3AR1,CX3CL1,CXCL12,CXCL5,CXCR4,CXCR6,FZD1,FZD2,FZD6,GNB4,GNG11,GPER1,GPR39,LPAR1,LPAR2,PROKR1,PTGER4,S1PR2,S1PR3,WNT10A
Extracellular matrix organization	Retain	0.0111576	0.0493814	0.318808	1.55094	100	29	0.29	0	0	Circadian Clock	0.0344828	ACTN1,ADAMTS1,CAPN10,COL4A1,COL4A2,COL5A1,COL5A3,DDR2,DST,F11R,FBLN2,FBLN5,FN1,HTRA1,ITGA5,ITGB1,ITGB7,LTBP1,LTBP4,MFAP1,MMP19,MMP2,NCAM1,NID1,PLOD2,SERPINE1,TGFB2,TNC,TPSAB1
Unfolded Protein Response (UPR)	ATF4 activates genes	2.83e-06	4.51e-05	0.511086	2.24942	59	16	0.271186	0	0	PERK regulates gene expression	0.5	ASNS,ATF3,ATF4,ATF6,DDIT3,DIS3,DNAJB9,ERN1,EXTL1,HERPUD1,HSPA5,PDIA5,PPP2R5B,TLN1,TSPYL2,XBP1
ATF4 activates genes	Retain	1.68e-05	0.000189188	0.736673	2.2816	15	7	0.466667	0	0	PERK regulates gene expression	1	ASNS,ATF3,ATF4,ATF6,DDIT3,DIS3,HERPUD1
PERK regulates gene expression	ATF4 activates genes	1.82e-06	3.42e-05	0.741388	2.41966	17	8	0.470588	0	0	Unfolded Protein Response (UPR)	1	ASNS,ATF3,ATF4,ATF6,DDIT3,DIS3,HERPUD1,HSPA5
Circadian Clock	Retain	0.00927357	0.0424111	0.422745	1.73707	43	18	0.418605	0	0	Major pathway of rRNA processing in the nucleolus and cytosol	0.0555556	ARNTL,BHLHE40,CRTC2,CRTC3,CRY1,CRY2,CSNK1E,HELZ2,HIF1A,MEF2D,NFIL3,PER1,PER2,PPP1CB,RAI1,RORA,SERPINE1,SIK1
Metabolism of nucleotides	Retain	0.0109974	0.0489884	-0.337149	-1.65404	50	16	0.32	0.1875	0	Mitotic G1-G1/S phases	0.1875	ADA,CTPS2,DCK,DCTPP1,DUT,GLRX,GMPR,NME4,NT5C2,NUDT1,PAICS,RRM1,RRM2,SAMHD1,TK1,TYMS
Amino acid transport across the plasma membrane	Retain	0.00411433	0.0206017	0.597834	1.90639	16	8	0.5	0	0	SLC-mediated transmembrane transport	0.75	SLC1A4,SLC25A29,SLC38A1,SLC3A2,SLC6A12,SLC7A1,SLC7A11,SLC7A5
SLC-mediated transmembrane transport	Amino acid transport across the plasma membrane	0.0101055	0.0456075	0.369154	1.65943	64	13	0.203125	0	0	Amino acid transport across the plasma membrane	0.461538	FGF21,SLC16A1,SLC1A4,SLC20A1,SLC25A29,SLC27A1,SLC2A1,SLC3A2,SLC4A7,SLC6A9,SLC7A1,SLC7A11,SLC7A5
CD28 co-stimulation	NA	0.00985002	0.0447491	0.538385	1.77009	18	6	0.333333	0	0	Major pathway of rRNA processing in the nucleolus and cytosol	0	CD80,FYN,SRC,THEM4,TRIB3,YES1
Amino acid synthesis and interconversion (transamination)	Retain	0.00151349	0.0089445	0.61354	2.00241	17	8	0.470588	0	0	PERK regulates gene expression	0.125	ALDH18A1,ASNS,GLUD1,GOT1,GPT2,PHGDH,PSAT1,PSPH
RAF-independent MAPK1/3 activation	Negative regulation of MAPK pathway	0.010316	0.0462536	0.53692	1.76527	18	9	0.5	0	0	Negative regulation of MAPK pathway	0.777778	DUSP1,DUSP10,DUSP16,DUSP4,DUSP5,DUSP8,IL6R,IL6ST,MAP2K2
Negative regulation of MAPK pathway	Retain	0.000193566	0.00159983	0.594542	2.13273	25	9	0.36	0	0	RAF-independent MAPK1/3 activation	0.777778	DUSP1,DUSP10,DUSP16,DUSP4,DUSP5,DUSP8,MAP2K2,PPP2R5B,RAF1
Fanconi Anemia Pathway	Cell Cycle, DNA Repair	0.000648908	0.00454236	-0.559485	-2.13464	20	13	0.65	0.384615	0	DNA Repair	1	CENPS,CENPX,EME1,FANCA,FANCB,FANCC,FANCD2,FANCG,FANCI,RPA1,RPA2,RPA3,UBE2T
G0 and Early G1	Cell Cycle	0.00581684	0.0281011	-0.528019	-1.89539	17	7	0.411765	1	0	Mitotic G1-G1/S phases	1	CCNE1,CCNE2,CDC6,CDK2,HDAC1,PCNA,RBL2
Activation of E2F1 target genes at G1/S	Cell Cycle	1.03e-06	2.21e-05	-0.714347	-2.65754	18	11	0.611111	1	0	Mitotic G1-G1/S phases	1	CCNE1,CDC45,CDC6,DHFR,FBXO5,HDAC1,PCNA,RBL2,RRM2,TK1,TYMS
G1/S-Specific Transcription	Cell Cycle	1.03e-06	2.21e-05	-0.714347	-2.65754	18	11	0.611111	1	0	Mitotic G1-G1/S phases	1	CCNE1,CDC45,CDC6,DHFR,FBXO5,HDAC1,PCNA,RBL2,RRM2,TK1,TYMS
HDR through Homologous Recombination (HRR)	Cell Cycle, DNA Repair	1.16e-05	0.00013729	-0.485982	-2.3252	45	26	0.577778	0.692308	0	DNA Repair	1	BRCA1,BRIP1,DNA2,EME1,EXO1,GEN1,PCNA,POLD3,POLE,POLE2,POLH,POLK,RAD51C,RAD51D,RFC2,RFC3,RFC5,RPA1,RPA2,RPA3,RTEL1,TOP3A,TOPBP1,WRN,XRCC2,XRCC3
Processing of DNA double-strand break ends	Cell Cycle	0.000351252	0.00267732	-0.438208	-2.11813	46	23	0.5	0.913043	0	DNA Repair	1	BABAM1,BRCA1,BRIP1,CCNA2,CDK2,CLSPN,DNA2,EXO1,HIST1H2BN,HIST1H4D,HIST1H4I,HIST1H4J,RFC2,RFC3,RFC5,RPA1,RPA2,RPA3,TIMELESS,TIPIN,TOP3A,TOPBP1,WRN
Homologous DNA Pairing and Strand Exchange	Cell Cycle	0.000147129	0.00129398	-0.537325	-2.21685	27	17	0.62963	0.823529	0	DNA Repair	1	BRCA1,BRIP1,DNA2,EXO1,RAD51C,RAD51D,RFC2,RFC3,RFC5,RPA1,RPA2,RPA3,TOP3A,TOPBP1,WRN,XRCC2,XRCC3
G2/M DNA damage checkpoint	Cell Cycle	0.000600085	0.0042439	-0.434922	-1.98928	38	15	0.394737	1	0	DNA Repair	1	BRCA1,BRIP1,CHEK2,DNA2,EXO1,HIST1H4I,HIST1H4J,RFC2,RFC3,RFC5,RPA1,RPA2,RPA3,TOP3A,TOPBP1
HDR through Single Strand Annealing (SSA)	Cell Cycle	0.00139731	0.00848276	-0.49681	-1.98983	25	12	0.48	1	0	DNA Repair	1	BRCA1,BRIP1,DNA2,EXO1,RFC2,RFC3,RFC5,RPA1,RPA2,RPA3,TOP3A,TOPBP1
Presynaptic phase of homologous DNA pairing and strand exchange	Cell Cycle	0.000307575	0.00242524	-0.529933	-2.17733	26	13	0.5	1	0	DNA Repair	1	BRCA1,BRIP1,DNA2,EXO1,RAD51C,RFC2,RFC3,RFC5,RPA1,RPA2,RPA3,TOP3A,TOPBP1
DNA strand elongation	Cell Cycle	1.29e-07	5.14e-06	-0.629608	-2.71722	31	20	0.645161	1	0	S Phase	1	CDC45,DNA2,FEN1,GINS2,LIG1,MCM2,MCM3,MCM4,MCM5,MCM6,MCM7,PCNA,POLA2,POLD3,RFC2,RFC3,RFC5,RPA1,RPA2,RPA3
Activation of ATR in response to replication stress	Cell Cycle	1.35e-07	5.14e-06	-0.665788	-2.66662	25	16	0.64	1	0	G2/M Checkpoints	1	CDC45,CDC6,CDK2,CLSPN,MCM2,MCM3,MCM4,MCM5,MCM6,MCM7,RFC2,RFC3,RFC5,RPA1,RPA2,RPA3
Activation of the pre-replicative complex	Cell Cycle	1.49e-05	0.000169826	-0.617548	-2.43501	24	19	0.791667	1	0	DNA Replication Pre-Initiation	1	CDC45,CDC6,CDK2,GMNN,MCM2,MCM3,MCM4,MCM5,MCM6,MCM7,ORC1,POLA1,POLA2,POLE,POLE2,PRIM2,RPA1,RPA2,RPA3
Lagging Strand Synthesis	Cell Cycle	9.28e-05	0.000902153	-0.625923	-2.35951	19	14	0.736842	1	0	Extension of Telomeres	1	DNA2,FEN1,LIG1,PCNA,POLA1,POLA2,POLD3,PRIM2,RFC2,RFC3,RFC5,RPA1,RPA2,RPA3
Telomere C-strand (Lagging Strand) Synthesis	Cell Cycle	0.000140294	0.00124989	-0.581932	-2.28292	22	16	0.727273	1	0	Extension of Telomeres	1	DNA2,FEN1,LIG1,PCNA,POLA1,POLA2,POLD3,POLE,POLE2,PRIM2,RFC2,RFC3,RFC5,RPA1,RPA2,RPA3
Extension of Telomeres	Cell Cycle	0.000335088	0.00258281	-0.51678	-2.13209	27	17	0.62963	1	0	Telomere Maintenance	1	DNA2,FEN1,LIG1,PCNA,POLA1,POLA2,POLD3,POLE,POLE2,PRIM2,RFC2,RFC3,RFC5,RPA1,RPA2,RPA3,TERT
PCNA-Dependent Long Patch Base Excision Repair	Cell Cycle	0.000546922	0.00399137	-0.589793	-2.19417	18	12	0.666667	1	0	DNA Repair	1	FEN1,LIG1,PCNA,POLD3,POLE,POLE2,RFC2,RFC3,RFC5,RPA1,RPA2,RPA3
Resolution of AP sites via the multiple-nucleotide patch replacement pathway	Cell Cycle	0.0030907	0.0158225	-0.499391	-1.95911	22	13	0.590909	0.923077	0	DNA Repair	1	FEN1,LIG1,PARP1,PCNA,POLD3,POLE,POLE2,RFC2,RFC3,RFC5,RPA1,RPA2,RPA3
Base Excision Repair	Cell Cycle	0.00132057	0.00808849	-0.474108	-2.02512	30	16	0.533333	0.75	0	DNA Repair	1	FEN1,LIG1,MBD4,MPG,PARP1,PCNA,POLD3,POLE,POLE2,RFC2,RFC3,RFC5,RPA1,RPA2,RPA3,UNG
Resolution of Abasic Sites (AP sites)	Cell Cycle	0.00132057	0.00808849	-0.474108	-2.02512	30	16	0.533333	0.75	0	DNA Repair	1	FEN1,LIG1,MBD4,MPG,PARP1,PCNA,POLD3,POLE,POLE2,RFC2,RFC3,RFC5,RPA1,RPA2,RPA3,UNG
Recognition of DNA damage by PCNA-containing replication complex	Cell Cycle	0.00458166	0.0226117	-0.485959	-1.91262	23	11	0.478261	0.909091	0	DNA Repair	1	DTL,PCNA,POLD3,POLE,POLE2,RFC2,RFC3,RFC5,RPA1,RPA2,RPA3
Gap-filling DNA repair synthesis and ligation in GG-NER	Cell Cycle	0.00266643	0.0141796	-0.503987	-1.97714	22	12	0.545455	0.916667	0	DNA Repair	1	LIG1,PCNA,POLD3,POLE,POLE2,POLK,RFC2,RFC3,RFC5,RPA1,RPA2,RPA3
DNA Damage Bypass	Cell Cycle, DNA Repair	0.00239605	0.0129425	-0.444494	-1.92651	32	16	0.5	0.625	0	DNA Repair	1	DTL,PCLAF,PCNA,POLD3,POLE,POLE2,POLH,POLK,RFC2,RFC3,RFC5,RPA1,RPA2,RPA3,TRIM25,UBE2L6
Translesion synthesis by Y family DNA polymerases bypasses lesions on DNA template	Cell Cycle, DNA Repair	0.00313266	0.0159185	-0.455828	-1.92039	28	15	0.535714	0.666667	0	DNA Repair	1	PCLAF,PCNA,POLD3,POLE,POLE2,POLH,POLK,RFC2,RFC3,RFC5,RPA1,RPA2,RPA3,TRIM25,UBE2L6
Termination of translesion DNA synthesis	Cell Cycle, DNA Repair	0.00057369	0.00409949	-0.515685	-2.11879	26	15	0.576923	0.666667	0	DNA Repair	1	PCLAF,PCNA,POLD3,POLE,POLE2,POLH,POLK,RFC2,RFC3,RFC5,RPA1,RPA2,RPA3,TRIM25,UBE2L6
Telomere Maintenance	Cell Cycle	1.26e-05	0.000146076	-0.512591	-2.34452	38	24	0.631579	1	0	Cell Cycle	1	DNA2,FEN1,H2AFV,HIST1H2AB,HIST1H2AE,HIST1H2BN,HIST1H4D,HIST1H4I,HIST1H4J,LIG1,PCNA,POLA1,POLA2,POLD3,POLE,POLE2,PRIM2,RFC2,RFC3,RFC5,RPA1,RPA2,RPA3,TERT
Chromosome Maintenance	Cell Cycle	6.91e-09	4.74e-07	-0.533428	-2.7493	57	39	0.684211	1	0	Cell Cycle	1	CENPC,CENPH,CENPI,CENPK,CENPL,CENPM,CENPS,CENPU,CENPX,DNA2,FEN1,H2AFV,HIST1H2AB,HIST1H2AE,HIST1H2BN,HIST1H4D,HIST1H4I,HIST1H4J,KNL1,LIG1,MIS18A,MIS18BP1,OIP5,PCNA,POLA1,POLA2,POLD3,POLE,POLE2,PRIM2,RBBP7,RFC2,RFC3,RFC5,RPA1,RPA2,RPA3,SMARCA5,TERT
DNA Repair	Retain	8.22e-06	0.000108217	-0.303796	-1.89061	162	68	0.419753	0.470588	0	DNA Double-Strand Break Repair	0.647059	ACTL6A,APBB1,BABAM1,BRCA1,BRIP1,CCNA2,CDK2,CENPS,CENPX,CHEK2,CLSPN,DNA2,DTL,EME1,EXO1,EYA1,FANCA,FANCB,FANCC,FANCD2,FANCG,FANCI,FEN1,GEN1,HIST1H2BN,HIST1H4D,HIST1H4I,HIST1H4J,KPNA2,LIG1,MBD4,MLH1,MPG,MSH2,MSH3,MSH6,PARP1,PCLAF,PCNA,PIAS3,POLD3,POLE,POLE2,POLH,POLK,POLL,POLM,POLR2L,RAD51C,RAD51D,RFC2,RFC3,RFC5,RPA1,RPA2,RPA3,RTEL1,TIMELESS,TIPIN,TOP3A,TOPBP1,TRIM25,UBE2L6,UBE2T,UNG,WRN,XRCC2,XRCC3
DNA Double-Strand Break Repair	Cell Cycle, DNA Repair	8.73e-07	2.09e-05	-0.417224	-2.34635	83	45	0.542169	0.644444	0	DNA Repair	0.977778	APBB1,BABAM1,BRCA1,BRIP1,CCNA2,CDK2,CHEK2,CLSPN,DNA2,EME1,EXO1,EYA1,FEN1,GEN1,HIST1H2BN,HIST1H4D,HIST1H4I,HIST1H4J,KPNA2,PARP1,PCNA,POLD3,POLE,POLE2,POLH,POLK,POLL,POLM,RAD51C,RAD51D,RFC2,RFC3,RFC5,RPA1,RPA2,RPA3,RTEL1,SMARCA5,TIMELESS,TIPIN,TOP3A,TOPBP1,WRN,XRCC2,XRCC3
HDR through Homologous Recombination (HRR) or Single Strand Annealing (SSA)	Cell Cycle	3.47e-06	5.29e-05	-0.440056	-2.31582	66	36	0.545455	0.722222	0	DNA Repair	1	BABAM1,BRCA1,BRIP1,CCNA2,CDK2,CLSPN,DNA2,EME1,EXO1,GEN1,HIST1H2BN,HIST1H4D,HIST1H4I,HIST1H4J,PCNA,POLD3,POLE,POLE2,POLH,POLK,RAD51C,RAD51D,RFC2,RFC3,RFC5,RPA1,RPA2,RPA3,RTEL1,TIMELESS,TIPIN,TOP3A,TOPBP1,WRN,XRCC2,XRCC3
Homology Directed Repair	Cell Cycle	2e-06	3.43e-05	-0.439831	-2.35254	70	38	0.542857	0.710526	0	DNA Repair	1	BABAM1,BRCA1,BRIP1,CCNA2,CDK2,CLSPN,DNA2,EME1,EXO1,FEN1,GEN1,HIST1H2BN,HIST1H4D,HIST1H4I,HIST1H4J,PARP1,PCNA,POLD3,POLE,POLE2,POLH,POLK,RAD51C,RAD51D,RFC2,RFC3,RFC5,RPA1,RPA2,RPA3,RTEL1,TIMELESS,TIPIN,TOP3A,TOPBP1,WRN,XRCC2,XRCC3
G2/M Checkpoints	Cell Cycle	2.36e-06	3.92e-05	-0.404478	-2.27467	83	38	0.457831	1	0	Cell Cycle	1	BABAM1,BRCA1,BRIP1,CCNB2,CDC45,CDC6,CDK2,CHEK2,CLSPN,DNA2,EXO1,GTSE1,HIST1H2BN,HIST1H4D,HIST1H4I,HIST1H4J,MCM2,MCM3,MCM4,MCM5,MCM6,MCM7,ORC1,PSMA7,PSMB2,PSMD1,PSMD2,PSME1,PSME4,RFC2,RFC3,RFC5,RPA1,RPA2,RPA3,TOP3A,TOPBP1,WRN
DNA Replication Pre-Initiation	Cell Cycle	2.42e-05	0.000268054	-0.443175	-2.22394	54	25	0.462963	1	0	Cell Cycle	1	CDC45,CDC6,CDK2,E2F2,GMNN,MCM2,MCM3,MCM4,MCM5,MCM6,MCM7,ORC1,POLA1,POLA2,POLE,POLE2,PRIM2,PSMB2,PSMD1,PSMD2,PSME1,PSME4,RPA1,RPA2,RPA3
G1/S Transition	Cell Cycle	1.89e-06	3.42e-05	-0.418605	-2.37128	85	38	0.447059	1	0	Mitotic G1-G1/S phases	1	AKT3,CCNA2,CCND1,CCNE1,CCNE2,CDC45,CDC6,CDK2,DHFR,FBXO5,GMNN,HDAC1,MCM2,MCM3,MCM4,MCM5,MCM6,MCM7,ORC1,PCNA,POLA1,POLA2,POLE,POLE2,PPP2R1B,PRIM2,PSMB2,PSMD1,PSMD2,PSME1,RBL2,RPA1,RPA2,RPA3,RRM2,SKP2,TK1,TYMS
Mitotic G1-G1/S phases	Cell Cycle	9.41e-07	2.15e-05	-0.400917	-2.3335	99	43	0.434343	1	0	Cell Cycle	1	AKT3,CCNA2,CCND1,CCND3,CCNE1,CCNE2,CDC45,CDC6,CDK2,CDKN2D,DHFR,E2F2,FBXO5,GMNN,HDAC1,LYN,MCM2,MCM3,MCM4,MCM5,MCM6,MCM7,ORC1,PCNA,POLA1,POLA2,POLE,POLE2,PPP2R1B,PRIM2,PSMB2,PSMD1,PSMD2,PSME1,RBL2,RPA1,RPA2,RPA3,RRM2,SKP2,TK1,TOP2A,TYMS
S Phase	Cell Cycle	1.06e-06	2.21e-05	-0.382652	-2.24111	106	45	0.424528	1	0	Cell Cycle	1	AKT3,CCNA2,CCND1,CCNE1,CCNE2,CDC23,CDC25B,CDC45,CDC6,CDK2,DNA2,ESCO2,FEN1,GINS2,LIG1,MCM2,MCM3,MCM4,MCM5,MCM6,MCM7,ORC1,PCNA,POLA1,POLA2,POLD3,POLE,POLE2,PRIM2,PSMB2,PSMD1,PSMD2,PSME1,PSME4,RAD21,RBL2,RFC2,RFC3,RFC5,RPA1,RPA2,RPA3,SKP2,SMC3,STAG1
Synthesis of DNA	Cell Cycle	1.1e-07	4.73e-06	-0.440985	-2.44563	81	37	0.45679	1	0	S Phase	1	CCNA2,CCNE1,CCNE2,CDC23,CDC45,CDC6,CDK2,DNA2,FEN1,GINS2,LIG1,MCM2,MCM3,MCM4,MCM5,MCM6,MCM7,ORC1,PCNA,POLA1,POLA2,POLD3,POLE,POLE2,PRIM2,PSMB2,PSMD1,PSMD2,PSME1,PSME4,RFC2,RFC3,RFC5,RPA1,RPA2,RPA3,SKP2
DNA Replication	Cell Cycle	2.19e-07	7.92e-06	-0.442536	-2.50684	85	39	0.458824	1	0	Cell Cycle	1	CCNA2,CCNE1,CCNE2,CDC23,CDC45,CDC6,CDK2,DNA2,E2F2,FEN1,GINS2,GMNN,LIG1,MCM2,MCM3,MCM4,MCM5,MCM6,MCM7,ORC1,PCNA,POLA1,POLA2,POLD3,POLE,POLE2,PRIM2,PSMB2,PSMD1,PSMD2,PSME1,PSME4,RFC2,RFC3,RFC5,RPA1,RPA2,RPA3,SKP2
Cellular responses to stress	Cell Cycle, DNA Repair	0.0015078	0.0089445	-0.233173	-1.50226	211	66	0.312796	0.606061	0	Cell Cycle	0.606061	AAAS,AGO1,AR,CBX2,CBX6,CCNA2,CCNE1,CCNE2,CDC23,CDK2,CDKN2D,DNAJA1,DNAJC7,DYNLL1,E2F2,EGLN3,GPX8,GSTP1,H2AFV,HDAC6,HIST1H1A,HIST1H1B,HIST1H1C,HIST1H1D,HIST1H1E,HIST1H2AB,HIST1H2AE,HIST1H3A,HIST1H3B,HIST1H3C,HIST1H3E,HIST1H3F,HIST1H3G,HIST1H3I,HIST1H4D,HIST1H4I,HIST1H4J,HIST2H3A,HSPA12A,HSPA1A,HSPA1B,HSPA2,HSPA4L,HSPA8,HSPH1,ID1,MAP2K6,MAPK3,MOV10,NUP155,NUP85,NUP93,PSMB2,PSMD1,PSMD2,PSME1,PSME4,RB…
RUNX1 regulates transcription of genes involved in differentiation of HSCs	Cell Cycle	0.0043077	0.0214137	-0.34583	-1.78241	57	24	0.421053	0.916667	0	Transcriptional regulation by RUNX1	1	H2AFV,H3F3A,HIST1H2AB,HIST1H2AE,HIST1H2BN,HIST1H3A,HIST1H3B,HIST1H3C,HIST1H3E,HIST1H3F,HIST1H3G,HIST1H3I,HIST1H4D,HIST1H4I,HIST1H4J,HIST2H3A,PSMA7,PSMB2,PSMD1,PSMD2,PSME1,PSME4,RUNX1,TCF3
Transcriptional regulation by RUNX1	Cell Cycle, Signaling by WNT	0.00196773	0.0109745	-0.296387	-1.74136	104	43	0.413462	0.581395	0	Signaling by WNT	0.627907	ACTL6A,AGO1,AUTS2,CBX2,CBX6,CCND1,CCND3,DPY30,ESR1,H2AFV,H3F3A,HDAC1,HIST1H2AB,HIST1H2AE,HIST1H2BN,HIST1H3A,HIST1H3B,HIST1H3C,HIST1H3E,HIST1H3F,HIST1H3G,HIST1H3I,HIST1H4D,HIST1H4I,HIST1H4J,HIST2H3A,KAT2B,LIFR,MOV10,PML,PSMA7,PSMB2,PSMD1,PSMD2,PSME1,PSME4,RUNX1,SIN3A,SMARCA2,SMARCC2,TCF3,TNRC6A,TNRC6B
TCF dependent signaling in response to WNT	Cell Cycle, Signaling by WNT	0.00908129	0.0418105	-0.278102	-1.61867	99	38	0.383838	0.710526	0	Signaling by WNT	1	AMER1,BCL9,BCL9L,BTRC,CBY1,FZD1,FZD2,FZD6,H2AFV,H3F3A,HDAC1,HIST1H2AB,HIST1H2AE,HIST1H2BN,HIST1H3A,HIST1H3B,HIST1H3C,HIST1H3E,HIST1H3F,HIST1H3G,HIST1H3I,HIST1H4D,HIST1H4I,HIST1H4J,HIST2H3A,MEN1,PPP2R1B,PSMA7,PSMB2,PSMD1,PSMD2,PSME1,PSME4,TCF7L1,TCF7L2,TERT,XIAP,XPO1
Signaling by WNT	Retain	0.00461824	0.0226294	-0.254246	-1.55159	134	49	0.365672	0.55102	0	TCF dependent signaling in response to WNT	0.77551	AGO1,AMER1,AP2S1,BCL9,BCL9L,BTRC,CALM3,CBY1,FZD1,FZD2,FZD6,GNAO1,GNB4,GNG11,H2AFV,H3F3A,HDAC1,HIST1H2AB,HIST1H2AE,HIST1H2BN,HIST1H3A,HIST1H3B,HIST1H3C,HIST1H3E,HIST1H3F,HIST1H3G,HIST1H3I,HIST1H4D,HIST1H4I,HIST1H4J,HIST2H3A,MEN1,MOV10,PPP2R1B,PSMA7,PSMB2,PSMD1,PSMD2,PSME1,PSME4,TCF7L1,TCF7L2,TERT,TNRC6A,TNRC6B,VANGL2,WNT10A,XIAP,XPO1
Signaling by Nuclear Receptors	Cell Cycle	0.00277109	0.0146166	-0.318434	-1.80914	86	37	0.430233	0.567568	0	ESR-mediated signaling	0.891892	AGO1,CCND1,CPT1A,CXCL12,CXXC5,GTF2A2,H2AFV,HDAC1,HIST1H2AB,HIST1H2AE,HIST1H2BN,HIST1H3A,HIST1H3B,HIST1H3C,HIST1H3E,HIST1H3F,HIST1H3G,HIST1H3I,HIST1H4D,HIST1H4I,HIST1H4J,HIST2H3A,KAT2B,KPNA2,MAPK3,MOV10,PDK2,PDK3,PDK4,POLR2L,POU2F1,RAD21,SMC3,STAG1,TNRC6A,TNRC6B,ZNF217
Estrogen-dependent gene expression	Cell Cycle, Signaling by WNT	0.00175908	0.0100561	-0.338228	-1.81252	71	32	0.450704	0.625	0	Signaling by Nuclear Receptors	1	AGO1,CCND1,CXCL12,CXXC5,GTF2A2,H2AFV,HDAC1,HIST1H2AB,HIST1H2AE,HIST1H2BN,HIST1H3A,HIST1H3B,HIST1H3C,HIST1H3E,HIST1H3F,HIST1H3G,HIST1H3I,HIST1H4D,HIST1H4I,HIST1H4J,HIST2H3A,KAT2B,KPNA2,MOV10,POLR2L,POU2F1,RAD21,SMC3,STAG1,TNRC6A,TNRC6B,ZNF217
ESR-mediated signaling	Cell Cycle, Signaling by WNT	0.0010135	0.00637855	-0.339899	-1.85635	73	33	0.452055	0.636364	0	Signaling by Nuclear Receptors	1	AGO1,CCND1,CXCL12,CXXC5,GTF2A2,H2AFV,HDAC1,HIST1H2AB,HIST1H2AE,HIST1H2BN,HIST1H3A,HIST1H3B,HIST1H3C,HIST1H3E,HIST1H3F,HIST1H3G,HIST1H3I,HIST1H4D,HIST1H4I,HIST1H4J,HIST2H3A,KAT2B,KPNA2,MAPK3,MOV10,POLR2L,POU2F1,RAD21,SMC3,STAG1,TNRC6A,TNRC6B,ZNF217
Mitotic Prophase	Cell Cycle	0.00203701	0.0111791	-0.326782	-1.78471	73	30	0.410959	1	0	M Phase	1	AAAS,CCNB2,H2AFV,HIST1H2AB,HIST1H2AE,HIST1H2BN,HIST1H3A,HIST1H3B,HIST1H3C,HIST1H3E,HIST1H3F,HIST1H3G,HIST1H3I,HIST1H4D,HIST1H4I,HIST1H4J,HIST2H3A,MAPK3,MASTL,NCAPD3,NCAPG2,NUP133,NUP155,NUP85,NUP93,PLK1,PPP2R1B,SMC2,SMC4,VRK2
Meiotic recombination	Cell Cycle	5.91e-07	1.56e-05	-0.583403	-2.60862	35	24	0.685714	1	0	Cell Cycle	1	BRCA1,CDK2,H2AFV,HIST1H2AB,HIST1H2AE,HIST1H2BN,HIST1H3A,HIST1H3B,HIST1H3C,HIST1H3E,HIST1H3F,HIST1H3G,HIST1H3I,HIST1H4D,HIST1H4I,HIST1H4J,HIST2H3A,MLH1,MLH3,RAD51C,RPA1,RPA2,RPA3,TOP3A
Meiosis	Cell Cycle	1.44e-06	2.9e-05	-0.513017	-2.48052	47	30	0.638298	1	0	Cell Cycle	1	BRCA1,CDK2,DIDO1,H2AFV,H3F3A,HIST1H2AB,HIST1H2AE,HIST1H2BN,HIST1H3A,HIST1H3B,HIST1H3C,HIST1H3E,HIST1H3F,HIST1H3G,HIST1H3I,HIST1H4D,HIST1H4I,HIST1H4J,HIST2H3A,HSPA2,MLH1,MLH3,RAD21,RAD51C,RPA1,RPA2,RPA3,SMC3,STAG1,TOP3A
Reproduction	Cell Cycle	6.61e-07	1.68e-05	-0.519738	-2.52284	48	31	0.645833	0.967742	0	Cell Cycle	0.967742	BRCA1,CD9,CDK2,DIDO1,H2AFV,H3F3A,HIST1H2AB,HIST1H2AE,HIST1H2BN,HIST1H3A,HIST1H3B,HIST1H3C,HIST1H3E,HIST1H3F,HIST1H3G,HIST1H3I,HIST1H4D,HIST1H4I,HIST1H4J,HIST2H3A,HSPA2,MLH1,MLH3,RAD21,RAD51C,RPA1,RPA2,RPA3,SMC3,STAG1,TOP3A
Cellular Senescence	Cell Cycle, DNA Repair	0.000247549	0.00199786	-0.333614	-1.90203	89	31	0.348315	0.645161	0	Cellular responses to stress	1	AGO1,CBX6,CCNA2,CCNE1,CCNE2,CDC23,CDK2,CDKN2D,E2F2,HIST1H1A,HIST1H1B,HIST1H1C,HIST1H1D,HIST1H1E,HIST1H2AB,HIST1H2AE,HIST1H3A,HIST1H3B,HIST1H3C,HIST1H3E,HIST1H3F,HIST1H3G,HIST1H3I,HIST1H4I,HIST1H4J,HIST2H3A,ID1,MAP2K6,MOV10,RBBP7,TNRC6B
Transcriptional regulation by small RNAs	Cell Cycle	0.00328142	0.0165519	-0.367959	-1.81573	51	24	0.470588	0.875	0	Gene Silencing by RNA	1	AAAS,AGO1,H2AFV,H3F3A,HIST1H2AB,HIST1H2AE,HIST1H2BN,HIST1H3A,HIST1H3B,HIST1H3C,HIST1H3E,HIST1H3F,HIST1H3G,HIST1H3I,HIST1H4D,HIST1H4I,HIST1H4J,HIST2H3A,NUP133,NUP155,NUP85,NUP93,POLR2L,TNRC6A
Gene Silencing by RNA	Cell Cycle	0.000171047	0.00144862	-0.410407	-2.12223	58	29	0.5	0.724138	0	Transcriptional regulation by small RNAs	0.827586	AAAS,AGO1,DGCR8,H2AFV,H3F3A,HIST1H2AB,HIST1H2AE,HIST1H2BN,HIST1H3A,HIST1H3B,HIST1H3C,HIST1H3E,HIST1H3F,HIST1H3G,HIST1H3I,HIST1H4D,HIST1H4I,HIST1H4J,HIST2H3A,NUP133,NUP155,NUP85,NUP93,POLR2L,PRKRA,TARBP2,TDRKH,TNRC6A,TNRC6B
Oxidative Stress Induced Senescence	Cell Cycle	0.000767645	0.00516279	-0.38013	-1.9341	56	27	0.482143	0.703704	0	Cellular responses to stress	0.925926	AGO1,CBX2,CBX6,CDKN2D,E2F2,H2AFV,HIST1H2AB,HIST1H2AE,HIST1H2BN,HIST1H3A,HIST1H3B,HIST1H3C,HIST1H3E,HIST1H3F,HIST1H3G,HIST1H3I,HIST1H4D,HIST1H4I,HIST1H4J,HIST2H3A,MAP2K6,MAPK3,MINK1,MOV10,RBBP7,TNRC6A,TNRC6B
RUNX1 regulates genes involved in megakaryocyte differentiation and platelet function	Cell Cycle	9.72e-06	0.000119021	-0.514368	-2.3533	39	25	0.641026	0.68	0	Transcriptional regulation by RUNX1	1	AGO1,DPY30,H2AFV,H3F3A,HDAC1,HIST1H2AB,HIST1H2AE,HIST1H2BN,HIST1H3A,HIST1H3B,HIST1H3C,HIST1H3E,HIST1H3F,HIST1H3G,HIST1H3I,HIST1H4D,HIST1H4I,HIST1H4J,HIST2H3A,KAT2B,MOV10,RUNX1,SIN3A,TNRC6A,TNRC6B
Pre-NOTCH Expression and Processing	Cell Cycle	0.00780804	0.0364375	-0.34717	-1.7032	50	25	0.5	0.6	0	Pre-NOTCH Transcription and Translation	0.92	AGO1,CCND1,H2AFV,HIST1H2AB,HIST1H2AE,HIST1H3A,HIST1H3B,HIST1H3C,HIST1H3E,HIST1H3F,HIST1H3G,HIST1H3I,HIST1H4D,HIST1H4I,HIST1H4J,HIST2H3A,KAT2B,LFNG,MAML2,MAML3,MOV10,NOTCH1,ST3GAL4,TNRC6A,TNRC6B
Pre-NOTCH Transcription and Translation	Cell Cycle	0.0010135	0.00637855	-0.417332	-1.95726	42	24	0.571429	0.666667	0	Pre-NOTCH Expression and Processing	0.958333	AGO1,CCND1,H2AFV,HIST1H2AB,HIST1H2AE,HIST1H2BN,HIST1H3A,HIST1H3B,HIST1H3C,HIST1H3E,HIST1H3F,HIST1H3G,HIST1H3I,HIST1H4D,HIST1H4I,HIST1H4J,HIST2H3A,KAT2B,MAML2,MAML3,MOV10,NOTCH1,TNRC6A,TNRC6B
Formation of the beta-catenin:TCF transactivating complex	Cell Cycle, Signaling by WNT	0.000258896	0.00206515	-0.456135	-2.08688	39	22	0.564103	0.772727	0	Signaling by WNT	1	BCL9,BCL9L,H2AFV,HDAC1,HIST1H2AB,HIST1H2AE,HIST1H2BN,HIST1H3A,HIST1H3B,HIST1H3C,HIST1H3E,HIST1H3F,HIST1H3G,HIST1H3I,HIST1H4D,HIST1H4I,HIST1H4J,HIST2H3A,MEN1,TCF7L1,TCF7L2,TERT
Condensation of Prophase Chromosomes	Cell Cycle	1.94e-06	3.42e-05	-0.617231	-2.60038	28	21	0.75	1	0	M Phase	1	H2AFV,H3F3A,HIST1H2AB,HIST1H2AE,HIST1H2BN,HIST1H3A,HIST1H3B,HIST1H3C,HIST1H3E,HIST1H3F,HIST1H3G,HIST1H3I,HIST1H4D,HIST1H4I,HIST1H4J,HIST2H3A,NCAPD3,NCAPG2,PLK1,SMC2,SMC4
RMTs methylate histone arginines	Cell Cycle	0.000706302	0.00489417	-0.435733	-2.02934	40	24	0.6	0.708333	0	Transcriptional regulation by RUNX1	0.75	ACTL6A,CCND1,H2AFV,HIST1H2AB,HIST1H2AE,HIST1H2AG,HIST1H2AH,HIST1H2AI,HIST1H2AK,HIST1H3A,HIST1H3B,HIST1H3C,HIST1H3E,HIST1H3F,HIST1H3G,HIST1H3I,HIST1H4D,HIST1H4I,HIST1H4J,HIST2H3A,JAK2,RBBP7,SMARCA2,SMARCC2
HDACs deacetylate histones	Cell Cycle	4.38e-06	6.14e-05	-0.527943	-2.41474	38	23	0.605263	0.695652	0	RMTs methylate histone arginines	0.782609	HDAC1,HIST1H2AB,HIST1H2AE,HIST1H2AG,HIST1H2AH,HIST1H2AI,HIST1H2AK,HIST1H2BN,HIST1H3A,HIST1H3B,HIST1H3C,HIST1H3E,HIST1H3F,HIST1H3G,HIST1H3I,HIST1H4D,HIST1H4I,HIST1H4J,HIST2H3A,PHF21A,RBBP7,SAP18,TBL1XR1
Amyloid fiber formation	Cell Cycle, Signaling by WNT	0.000477348	0.00352108	-0.449853	-2.03443	37	19	0.513514	0.789474	0	Signaling by WNT	0.789474	APH1B,BACE1,H3F3A,HIST1H2AB,HIST1H2AE,HIST1H2BN,HIST1H3A,HIST1H3B,HIST1H3C,HIST1H3E,HIST1H3F,HIST1H3G,HIST1H3I,HIST1H4D,HIST1H4I,HIST1H4J,HIST2H3A,TSPAN14,UBE2L6
Activation of HOX genes during differentiation	Cell Cycle	0.00713868	0.0337733	-0.356436	-1.72343	47	20	0.425532	0.8	0	Activation of anterior HOX genes in hindbrain development during early embryogenesis	1	CNOT6,EGR2,H2AFV,HIST1H2AB,HIST1H2AE,HIST1H2BN,HIST1H3A,HIST1H3B,HIST1H3C,HIST1H3E,HIST1H3F,HIST1H3G,HIST1H3I,HIST1H4D,HIST1H4I,HIST1H4J,HIST2H3A,PBX1,POLR2L,RBBP7
Activation of anterior HOX genes in hindbrain development during early embryogenesis	Cell Cycle	0.00713868	0.0337733	-0.356436	-1.72343	47	20	0.425532	0.8	0	Activation of HOX genes during differentiation	1	CNOT6,EGR2,H2AFV,HIST1H2AB,HIST1H2AE,HIST1H2BN,HIST1H3A,HIST1H3B,HIST1H3C,HIST1H3E,HIST1H3F,HIST1H3G,HIST1H3I,HIST1H4D,HIST1H4I,HIST1H4J,HIST2H3A,PBX1,POLR2L,RBBP7
PRC2 methylates histones and DNA	Cell Cycle	0.000125299	0.00116156	-0.538083	-2.26693	28	22	0.785714	0.772727	0	ERCC6 (CSB) and EHMT2 (G9a) positively regulate rRNA expression	0.772727	DNMT1,EZH2,H2AFV,H3F3A,HIST1H2AB,HIST1H2AE,HIST1H2BN,HIST1H3A,HIST1H3B,HIST1H3C,HIST1H3D,HIST1H3E,HIST1H3F,HIST1H3G,HIST1H3I,HIST1H4D,HIST1H4I,HIST1H4J,HIST2H3A,JARID2,MTF2,RBBP7
ERCC6 (CSB) and EHMT2 (G9a) positively regulate rRNA expression	Cell Cycle	0.000160008	0.00137207	-0.51922	-2.21781	30	19	0.633333	0.947368	0	Cell Cycle	0.947368	CBX3,H2AFV,H3F3A,HDAC1,HIST1H2AB,HIST1H2AE,HIST1H2BN,HIST1H3A,HIST1H3B,HIST1H3C,HIST1H3E,HIST1H3F,HIST1H3G,HIST1H3I,HIST1H4D,HIST1H4I,HIST1H4J,HIST2H3A,RBBP7
RNA Polymerase I Promoter Opening	Cell Cycle	4.67e-06	6.4e-05	-0.654348	-2.51998	21	17	0.809524	1	0	RHO GTPase Effectors	1	H2AFV,H3F3A,HIST1H2AB,HIST1H2AE,HIST1H2BN,HIST1H3A,HIST1H3B,HIST1H3C,HIST1H3E,HIST1H3F,HIST1H3G,HIST1H3I,HIST1H4D,HIST1H4I,HIST1H4J,HIST2H3A,MAPK3
DNA methylation	Cell Cycle, Signaling by WNT	1.05e-05	0.000126902	-0.630653	-2.47406	22	17	0.772727	0.941176	0	Signaling by WNT	0.941176	H2AFV,H3F3A,HIST1H2AB,HIST1H2AE,HIST1H2BN,HIST1H3A,HIST1H3B,HIST1H3C,HIST1H3E,HIST1H3F,HIST1H3G,HIST1H3I,HIST1H4D,HIST1H4I,HIST1H4J,HIST2H3A,UHRF1
Activated PKN1 stimulates transcription of AR (androgen receptor) regulated genes KLK2 and KLK3	Cell Cycle	7.41e-05	0.000794079	-0.578302	-2.28026	24	17	0.708333	0.941176	0	RHO GTPase Effectors	1	AR,H2AFV,H3F3A,HIST1H2AB,HIST1H2AE,HIST1H2BN,HIST1H3A,HIST1H3B,HIST1H3C,HIST1H3E,HIST1H3F,HIST1H3G,HIST1H3I,HIST1H4D,HIST1H4I,HIST1H4J,HIST2H3A

## Sheet: Column definitions
Tab 1 - GSEA	Gene set enrichment analysis of REACTOME pathways using PC1 weights as gene ranks; Related to Fig. 2C
Pathway	Name of REACTOME pathway
Retained pathway	"Retain" if pathway was included in the list of minimally-redundant gene sets for visualization. Otherwise, this column names the pathway(s) selected to represent it
Pval	Nominal p-value for pathway enrichment
Padj	Benjamini-Hochberg corrected p-value for pathway enrichment
ES	Nominal enrichment score
NES	Enrichment score normalized to mean enrichment of random samples of the same size
Size	Number of genes from the input gene list annotated as part of this pathway
nLeadingEdge	Number of genes in the leading edge
fracLeading	Fraction of genes in the leading edge (nLeadingEdge/Size)
Cell cycle overlap	The fraction of leading edge genes overlapping with leading edge genes of the "Cell Cycle" pathway
Translation overlap	The fraction of leading edge genes overlapping with leading edge genes of the "Eukaryotic Translation Initiation" pathway
Max overlap pathway	The pathway with the most shared leading edge genes
Max overlap fraction	The fraction of overlap in leading edge genes with the max overlap pathway
Leading edge genes	List of leading edge genes
