# Supplementary material for: Distinct mitochondrial defects trigger the integrated stress response depending on the metabolic state of the cell
Source: eLife. 2020 May 28;9:e49178. doi: 10.7554/eLife.49178 (PMC7255802; doi:10.7554/eLife.49178)
Supplement: Figure 4—source data 1. [file elife-49178-fig4-data1.xlsx]

## Sheet: 1 - Metabolite Profiling
Metabolite	m/z	Retention time (min)	Ctrl_Pier_DMSO_Log2FC	Ctrl_Pier_DMSO_Pval	Ctrl_Pier_DMSO_Padj	Lb_Pier_DMSO_Log2FC	Lb_Pier_DMSO_Pval	Lb_Pier_DMSO_Padj	Ctrl_DMSO_1	Ctrl_DMSO_2	Ctrl_DMSO_3	Ctrl_Pier_1	Ctrl_Pier_2	Ctrl_Pier_3	Lb_DMSO_1	Lb_DMSO_2	Lb_DMSO_3	Lb_Pier_1	Lb_Pier_2	Lb_Pier_3
Phosphoserine	184.001	9.7809	-4.86809	4.59157e-20	3.16818e-18	-0.28056	0.00567594	0.0122387	1717.22	1530.33	1974.86	54.9053	56.6485	66.9911	9472.4	8031.05	8783.31	6679.74	7194.97	7757.66
Aspartate	132.03	8.70795	-3.66397	4.05883e-19	1.4003e-17	-1.21187	3.49558e-14	4.8239e-13	574947	557719	614566	45829.2	47921.2	44060	804647	700529	807791	333185	317030	346831
AICAR	337.054	8.90372	3.15321	4.55994e-18	1.04879e-16	0.805882	1.58076e-08	9.9157e-08	705.003	698.343	699.828	6289.94	5933.13	6500.62	423.25	493.07	585.977	938.437	759.844	916.306
Asparagine	131.046	8.21213	-2.26485	7.031e-15	1.21285e-13	0.0901925	0.329154	0.412939	8969.78	9575.98	10985.3	2013.95	1996.13	2114.33	9140.12	8923.68	8994.82	10415.8	9102.29	9334.61
Citrate	191.019	11.1084	-1.83806	1.54965e-13	1.78677e-12	-1.10254	4.10186e-13	4.71714e-12	896133	907726	1.02531e+06	266431	251697	272136	1.20218e+06	1.20092e+06	1.24384e+06	628401	535293	539167
IMP	347.038	9.17862	2.3222	1.55372e-13	1.78677e-12	-0.313711	0.00205699	0.00525676	2192.07	2051.47	2092.74	8687.11	10294.3	13161.8	2213.63	1935.52	2272.52	1733.77	1626.24	1798.56
Succinate	117.019	9.06042	-1.49242	5.87603e-12	5.79209e-11	-1.64158	5.08972e-17	3.51191e-15	18996.9	17222.6	16582	6509.3	5927.68	6312.65	32519	24753	27150.1	9438.91	8548.05	8917.63
Alpha-ketoglutarate	145.014	9.2383	-0.940543	7.67972e-09	6.62375e-08	-0.176237	0.0652391	0.115423	55227.3	58373.7	59709	31699.4	28983.1	29636	94693.8	93939	101990	93445.5	82907.3	81174.2
Malate	133.014	9.6254	-0.71332	6.70937e-07	5.14385e-06	0.0926008	0.320827	0.411536	330830	366855	384411	216835	226550	215480	451770	407378	473698	489360	459983	469541
Phosphocreatine	210.028	8.94303	-0.746137	9.10252e-07	6.28074e-06	-1.24263	1.43683e-14	3.30471e-13	36656.9	38451.2	44477.1	21987	23707.6	25487.1	46601.9	42970.9	50463.4	19420.1	19416.3	20227
Mannitol/Sorbitol / Galactitol	181.071	7.27528	0.710867	1.54878e-06	9.71509e-06	0.032614	0.732649	0.765952	67515.1	71435.2	74526.6	108569	110085	131876	39129.8	33251.8	40425.6	38734.6	36531.1	39780.5
Proline	114.056	6.43823	0.781878	3.08952e-06	1.77647e-05	-1.05838	4.39204e-12	4.32929e-11	5587.53	6155.59	7310.48	9321.35	11161.8	12283.7	6249.62	6057.36	6724.35	3528.84	2845.48	2806.62
UDP-N-Acetylglucosamine / UDP-N-Acetylgalactosamine	628.054	9.00178	-0.617471	3.36784e-06	1.78755e-05	-0.396234	0.000181396	0.000625815	22321.4	24388.4	24698.4	15111.1	15704.5	15689.9	26724.8	23716.8	27451.9	20656	18342	20147.2
Serine	104.035	8.498	0.557448	1.83148e-05	9.02658e-05	0.20518	0.0323737	0.0603726	20681	19144.9	20447.1	27132	30402.5	31281.6	27182.5	25072	28347.1	32704.5	30633.3	29544.8
Creatine	130.062	7.7372	0.590478	2.06355e-05	9.49231e-05	0.797714	7.25826e-10	5.56467e-09	28136.7	32421.2	35081.6	50806	44743.9	48060.4	34980.6	31844.7	31945.3	60127.1	53732.7	57858.9
Ornithine / D-Ornithine	131.082	11.3705	0.555635	4.69105e-05	0.000202302	0.111196	0.347402	0.420539	1015.76	866.487	855.078	1202	1389.72	1430.59	898.598	613.514	969.66	812.355	923.287	898.147
Tyrosine	180.066	6.85585	0.571756	5.16522e-05	0.000203209	0.0302607	0.753437	0.775928	204607	160464	163502	239408	273250	269446	186375	159046	201405	184416	183028	188363
Glycerol 3-Phosphate	171.006	8.76635	0.519938	5.3011e-05	0.000203209	-0.156477	0.116211	0.192766	11051.6	10308.1	12392	15444.3	16173.7	16661.7	10770.4	8813.57	10286.1	9468.77	8120.78	9171.27
Alanine / D-Alanine	88.04	7.7372	0.525566	6.08942e-05	0.000221142	0.677277	1.82368e-08	1.04861e-07	24636	29566.7	29936.8	41554	38680.1	40468	32115.1	29965	31079.2	51527.8	46864.5	50646.6
Histidine	154.062	7.69942	0.446436	0.000162139	0.000559379	0.0355485	0.70223	0.745445	460810	427654	452220	580019	608881	638501	478649	424371	494461	473630	461996	494221
Tryptophan	203.082	5.74077	0.495153	0.000229631	0.000754501	0.0522425	0.584396	0.650376	124199	99281.5	100422	137732	160385	156958	126783	108626	134741	129466	125087	127735
Glutamine	145.061	8.05985	0.44474	0.000258599	0.00081106	0.110356	0.243198	0.332616	2.57556e+06	2.44155e+06	2.5653e+06	3.13161e+06	3.46522e+06	3.74815e+06	2.8779e+06	2.46127e+06	2.84872e+06	3.03256e+06	2.82487e+06	2.96305e+06
Fructose 1,6-bisphosphate	360.969	11.1084	0.637762	0.00029839	0.000895169	-0.0755042	0.414357	0.484588	5636.95	6584.18	8216.85	8458.38	10474.5	12965.4	3283.21	3664.29	3719.06	3475.43	3243.13	3392.83
Phenylalanine	164.071	4.7297	0.451662	0.000327248	0.000940838	0.316175	0.00146748	0.00421902	580095	471746	484414	668164	723850	701108	443558	500008	449573	578690	568957	584436
Leucine / Norleucine	130.087	5.13647	0.457437	0.00040136	0.00110775	0.144214	0.117336	0.192766	831340	669643	686627	925012	1.06763e+06	1.00203e+06	739514	722139	792326	833858	823782	831392
Valine / Norvaline	116.071	6.33888	0.464634	0.000455298	0.00120829	0.00394882	0.968181	0.968181	86048.7	67638.5	69032.3	93440.8	107956	104668	90843.2	74364.5	98081	87666.6	86239.3	88362.8
CDP	402.009	10.2312	0.402488	0.000549209	0.00140353	0.875713	2.14654e-10	1.85139e-09	2891.56	2894.79	2621.17	3918.5	3672.64	3520.7	3293.42	3342.96	3070.72	6251.45	5238.04	6378.48
Methionine	148.043	5.74077	0.398627	0.000615149	0.0015159	0.0889402	0.33776	0.416168	102920	95606	100348	121389	133567	139512	102274	94032.3	108439	106055	105930	111686
Threonine / Allothreonine	118.051	7.68057	0.415867	0.00114489	0.00272404	0.145684	0.122019	0.195798	298731	346165	372531	413316	442161	500529	419667	383022	416670	443205	424848	481558
3-Phosphoglycerate / 2-Phosphoglycerate	184.985	10.2114	-0.360359	0.00128364	0.00295238	-0.561772	1.12422e-06	5.96701e-06	99409	95392.4	106921	79329.3	75641.8	79867.3	118484	110407	115576	86526.6	74040.9	73378.7
Phosphoenolpyruvate	166.974	10.6319	-0.343518	0.00214648	0.00477765	-0.517266	2.26075e-06	1.11423e-05	40358.1	42220.4	45806.5	32930.4	32789	35385.7	54058.9	51653.3	55763.1	38291.4	36452	38049.8
2-Hydroxyglutarate	147.029	9.06042	-0.333366	0.00221725	0.00478094	-0.122734	0.201491	0.289644	57014.6	60209.8	62834.3	48076	48288.7	46453.3	71235.1	60575.3	72066.6	64037.5	58925.1	63848.3
4-Aminobutanoate	102.056	8.51688	0.305715	0.00635585	0.0132895	0.13719	0.14179	0.215713	207502	213503	242386	257152	275284	286451	227870	207616	235093	254332	237576	244838
Glutamate	146.045	8.51688	0.302599	0.0067382	0.0136746	0.108421	0.243656	0.332616	3.71643e+06	3.88284e+06	4.32308e+06	4.61379e+06	4.88019e+06	5.19814e+06	4.34972e+06	3.94011e+06	4.48509e+06	4.72158e+06	4.41103e+06	4.62409e+06
Palmitate	255.232	1.80608	-0.402307	0.00876304	0.0172757	0.206929	0.0676649	0.116722	759664	936612	581055	638054	545026	514997	422700	519238	507490	667814	554281	462719
ATP	505.987	9.76145	-0.289018	0.0127346	0.024408	-0.315145	0.00219615	0.00541195	1.74094e+06	1.72488e+06	2.05739e+06	1.44073e+06	1.41841e+06	1.65754e+06	1.7552e+06	1.92872e+06	1.84604e+06	1.44625e+06	1.35723e+06	1.65324e+06
N-Acetylneuraminate	308.097	7.64278	-0.263443	0.0198166	0.0369554	-0.402799	0.000125045	0.000454112	128732	140549	154163	128024	116249	108369	165754	149610	156025	121650	109969	125162
Arginine	173.104	12.8088	0.269927	0.0256215	0.0457172	-0.117396	0.245846	0.332616	142077	110391	107951	135172	150908	145497	138472	113691	151541	124391	126962	118342
Dihydroxyacetone Phosphate	168.99	9.00178	0.420191	0.0258401	0.0457172	-1.29164	3.01552e-14	4.8239e-13	15161.6	16105.7	22605.5	17138.4	24099	32021.4	9805.34	10585.1	12483	4376.31	4185.34	4821.33
Lysine	145.098	12.2835	0.278718	0.0306875	0.052936	-0.0693308	0.491899	0.561315	89281.1	66236.8	63745.5	81299.5	92631.6	89365.1	74856.8	63532.2	85170.9	70089.7	74178.5	67448.4
dGDP	426.021	9.80037	-0.236051	0.0354724	0.0596975	-0.280072	0.00459106	0.0102188	246274	256988	298853	216248	216706	247054	258393	263933	264813	217215	198788	233617
Hexose(2)	179.055	7.07787	-0.2122	0.0398872	0.0655289	-0.39994	0.000273636	0.000899091	6789.13	6434.18	6669.4	5414.12	5603.02	6177.45	5477.12	4490.9	5821.78	4003.05	3855.59	4039.04
D-Gluconate	195.05	7.81312	0.210365	0.046384	0.0744302	0.0158926	0.862578	0.875263	381990	384919	412940	415322	463285	488713	279234	258734	298000	282625	274830	286493
NAD+	662.1	7.98412	-0.193736	0.0673451	0.105609	-0.194507	0.0436295	0.0792221	185599	210229	223845	178856	174727	186806	197179	195772	215164	187733	162689	181479
Glutathione Reduced	328.057	8.30818	0.173984	0.0815592	0.125058	-0.0475356	0.607274	0.66511	58481.8	63282.5	63899	69096.8	67874.1	72403.6	94173.7	90881	97968	88538.6	86698.3	98949.7
Oleate/Elaidate	281.248	1.787	-0.217193	0.0849971	0.127496	0.151057	0.138729	0.215713	146829	158923	109849	117853	121645	113820	89304.1	111622	97833.4	115428	118260	97808.6
UMP	323.027	8.94303	-0.164846	0.0971021	0.142554	0.486764	5.95923e-06	2.61259e-05	4671.93	4553.36	4998.63	4381.43	4135.23	4165.73	5124.91	4946.74	5066.26	7215.54	6735.1	7272.3
GDP	442.015	10.8511	0.171474	0.107878	0.155075	0.222345	0.0194386	0.0383218	16387.9	15304.8	18845.8	19586.7	18179	18962.2	17044.1	17017.1	17617.9	20665.8	18801.3	20882
Ribose 5-Phosphate	229.011	9.25805	-0.169946	0.129913	0.182939	-1.6494	1.9633e-15	6.7734e-14	37586.4	35279.8	38212	28454.2	33451.4	37386.9	33423.1	25857.8	30435.8	11726.7	9169.19	7924.36
N-Methylaspartate	146.045	6.87575	0.15894	0.135621	0.187157	-0.0632413	0.496235	0.561315	29928.8	29884.6	33911.9	31612.8	35461.3	37653.8	28075.5	26910.7	30717.8	27542.3	25867.5	28561.2
GTP	521.981	11.7968	0.166933	0.16068	0.21739	-0.364466	0.00158679	0.00437954	89694.1	84113.3	109763	99401.3	98710.2	119422	78587.9	99829.7	86404.7	65401.5	60313.9	80538.1
UDP	402.993	9.85888	0.142349	0.1704	0.226108	0.488956	6.43681e-06	2.61259e-05	98068.1	90431.8	106541	114760	101703	108842	95897.7	97083.9	92658	140171	125475	135580
AMP/dGMP	346.054	7.94612	-0.124835	0.215174	0.280132	-0.0913003	0.322072	0.411536	51533	52828.4	60096.1	50911.2	49318.2	50262.2	63906.3	59254.4	62098.5	61379.4	54681.9	57946.5
Phosphorylcholine	182.058	8.40338	-0.118312	0.229721	0.293532	-0.2565	0.00956171	0.0199927	99087.7	98610.7	110373	94925.5	96183.2	92359.1	88659	79790.9	89145.1	77096.3	71967	66675.2
UTP	482.96	10.8119	-0.134499	0.236784	0.297056	-0.500551	6.16082e-06	2.61259e-05	420284	436138	508938	380458	391099	473995	431293	467330	477425	332025	299561	341667
Palmitoleate	253.216	1.82515	-0.119166	0.284906	0.351044	0.13727	0.162839	0.239062	15914.2	13058.6	11921.3	12469.1	12643.8	12265.1	8910.04	11426	9929.1	10847.8	11236.7	11032.3
Glucosamine 6-Phosphate	258.037	8.98225	0.106995	0.317026	0.383768	-0.36022	0.000434878	0.00136393	6837.27	7039.89	7563.82	7073.53	7323.76	8778.99	5661.2	5791.2	5882.77	4379.67	4238.1	4912.87
Cysteate	167.997	9.25805	-0.0820964	0.408653	0.486157	-0.143383	0.143808	0.215713	2189.34	1969.47	2276.33	1962.65	2102.67	2005.13	1735.05	1969.71	2177.22	1813.17	1677.97	1815.13
UDP Glucuronate	579.025	11.8578	-0.0849332	0.451159	0.527627	-0.795607	7.11153e-09	4.90695e-08	69767.5	74460.2	91600.5	79265.8	72986.1	68936.2	80131.7	79735.1	95651.4	46488.7	44396.9	56616.1
Xylitol / Ribitol / Arabitol	151.061	6.61707	0.0823341	0.505936	0.581826	-0.250789	0.0149407	0.0303208	2166	2846.6	3144.77	2652.69	2842.84	3051.34	1169.36	1335.38	1513.66	1174.84	1110.9	1075.09
Hydroxyphenyllactate	181.05	5.05917	-0.0665894	0.532423	0.602249	0.20574	0.0298312	0.0571765	8436.48	9460.94	10107.3	7999.22	9537.91	9206.47	6248.79	6710.89	7016.84	7890.02	7529.18	7597.91
ADP	426.021	8.86437	0.0565946	0.564109	0.621825	0.322938	0.00115648	0.00346944	128838	132375	148465	141071	144247	139972	151269	140416	153471	187557	177640	191497
N-Acetylglutamate	188.056	8.32728	0.0580042	0.567754	0.621825	-0.102388	0.27665	0.367093	24840.8	25859.4	29712.6	26834.7	27723.1	28944.7	30144	26581.1	29723.8	27456.6	25032.5	28006.7
3-Hydroxymethylglutarate	161.045	8.34633	-0.0503325	0.618456	0.666772	0.464541	3.48998e-05	0.000133783	17811.9	20433.5	20375.6	19852.3	19084.4	17628.7	19793.3	15640.7	18416.6	25843	24175.1	23976.8
Glycine	74.0244	8.46015	-0.0264555	0.793353	0.842175	-0.316354	0.00194893	0.00517217	15191.2	15326.6	17414	14576.7	15908.5	16548.4	20262.8	18192.1	21723.5	16799.6	15226.1	16215.4
Thiopurine S-Methylether	187.006	2.75957	-0.039351	0.812786	0.849731	-0.0815124	0.376488	0.447891	11889.5	7240.17	6578.44	8299.92	9169.46	6856.15	10640.3	10024.4	10739.9	10105.9	10357.3	9237.96
Guanidinoacetate	116.046	8.46015	0.0165003	0.869404	0.895357	-0.283817	0.00430502	0.00990154	2578.45	2712.97	2915.73	2699.52	2604.02	3002.77	4036.62	3655.42	3820.1	3395.73	3128.37	2940.8
dGMP	346.054	8.88403	0.00563324	0.95316	0.967177	0.296341	0.00304389	0.00724236	8890.45	8491.32	9570.31	9056.73	8947	9021.19	9198.27	8909.61	10155.1	11531.8	10932.4	12225.4
3-Methyladenine	148.062	3.64047	-0.00315948	0.975841	0.975841	-0.0827878	0.667835	0.720009	5670.15	6454.37	5347.01	5635.49	5481.15	6293.66	7996.84	16035.5	7341.97	6535.84	13682	8863.36

## Sheet: Column definitions
Tab 1 - Metabolite Profiling	LC/MS peak intensities and differential abundance analysis for metabolites identified based on in-house standard library in control (Luc) and LbNOX cells treated with DMSO or Piericidin; Related to Fig. 4C, S4C
Metabolite	Metabolite name
m/z	Charge over mass ratio
Retention time (min)	Retention time on column
Ctrl_Pier_DMSO_Log2FC	Log2 fold-change of metabolite abundance between Pieircidin- and DMSO-treated cells expressing Luciferase (control)
Ctrl_Pier_DMSO_Pval	P-value for differential metabolite peak intensity, based on a moderated t-statistic
Ctrl_Pier_DMSO_Padj	Benjamini-Hochberg adjusted p-value
Lb_Pier_DMSO_Log2FC	Log2 fold-change of metabolite abundance between Pieircidin- and DMSO-treated cell expressing LbNOX
Lb_Pier_DMSO_Pval	P-value for differential metabolite peak intensity, based on a moderated t-statistic
Lb_Pier_DMSO_Padj	Benjamini-Hochberg adjusted p-value
Ctrl_DMSO_1	Metabolite peak intensity in: Control cells, treated, with DMSO, biological replicate #1
…	…
