# Supplementary material for: Distinct mitochondrial defects trigger the integrated stress response depending on the metabolic state of the cell
Source: eLife. 2020 May 28;9:e49178. doi: 10.7554/eLife.49178 (PMC7255802; doi:10.7554/eLife.49178)
Supplement: Supplementary file 1. — Related to Figure 2A, D-F, Figure 2—figure supplement 1A, Figure 3F, Figure 5A,I, Figure 5—figure supplement 1D. [file elife-49178-supp1.xlsx]

## Sheet: 1 - Ctrl Myoblasts PCA
Gene_ID	Gene_symbol	Human_gene_symbol	Human_gene_entrez	ATF4_DDIT3_target	Cell_cycle	Cholesterol_biosynthesis	PC1_weight	PC1_js_pval	PC1_js_padj	PC2_weight	PC2_js_pval	PC2_js_padj	PC3_weight	PC3_js_pval	PC3_js_padj
ENSMUSG00000000001	Gnai3	GNAI3	2773	0	0	0	0.000619373	0.409634	0.467173	-0.00619748	0.00255594	0.0121601	0.00554283	0.0193803	0.0699183
ENSMUSG00000000028	Cdc45	CDC45	8318	0	1	0	-0.0145747	3.92e-05	0.000678932	0.00766786	0.00280822	0.012904	-0.0041895	0.116564	0.245307
ENSMUSG00000000031	H19	H19	283120	0	0	0	0.00437593	0.0167333	0.0279403	0.029777	0.00011521	0.00307044	-0.0185345	0.00257963	0.0220239
ENSMUSG00000000056	Narf	NARF	26502	0	0	0	-0.0258471	0.000289161	0.00167071	-0.00210291	0.661726	0.754449	-0.00374558	0.604366	0.747453
ENSMUSG00000000058	Cav2	CAV2	858	0	0	0	-0.0279933	1.34e-05	0.000437989	0.00451182	0.0957556	0.172865	-0.00482209	0.214085	0.375461
ENSMUSG00000000078	Klf6	KLF6	1316	0	0	0	0.0390826	4.02e-06	0.000286596	0.0389415	5.59e-05	0.00269317	0.0180442	0.00378261	0.0263378
ENSMUSG00000000085	Scmh1	SCMH1	22955	0	0	0	0.00180288	0.184295	0.231655	0.00277927	0.226239	0.33947	-0.00780927	0.0425775	0.121196
ENSMUSG00000000088	Cox5a	COX5A	9377	0	0	0	0.000188433	0.736585	0.775923	-0.00468617	0.00263549	0.0124074	-0.00724236	0.00238925	0.0213201
ENSMUSG00000000126	Wnt9a	WNT9A	7483	0	0	0	-0.00368905	0.065624	0.0930172	0.00417623	0.19601	0.304051	-0.0116246	0.0331841	0.101573
ENSMUSG00000000127	Fer	FER	2241	0	0	0	-0.00454208	0.00508942	0.0105534	0.00174169	0.383478	0.507032	-0.00940956	0.0130787	0.0533261
ENSMUSG00000000131	Xpo6	XPO6	23214	0	0	0	0.00249765	0.0285496	0.044576	-0.000702135	0.671079	0.761697	-0.0037091	0.164372	0.310863
ENSMUSG00000000134	Tfe3	TFE3	7030	0	0	0	0.00815349	0.00124231	0.00385621	-0.00161034	0.496284	0.612261	0.007585	0.0603109	0.153665
ENSMUSG00000000148	Brat1	BRAT1	221927	0	0	0	0.00437726	0.0127462	0.0221807	0.00381684	0.138668	0.232877	0.0138591	0.00591233	0.0333456
ENSMUSG00000000149	Gna12	GNA12	2768	0	0	0	0.00244345	0.0466595	0.0686894	-0.00729206	0.00539012	0.019626	-0.0153437	0.00162247	0.0184109
ENSMUSG00000000167	Pih1d2	PIH1D2	120379	0	0	0	-0.00418372	0.0279083	0.0436939	-0.000146586	0.957609	0.972917	0.0054905	0.209782	0.370495
ENSMUSG00000000168	Dlat	DLAT	1737	0	0	0	0.00351467	0.0362825	0.0550566	-0.00309699	0.230762	0.344457	-0.00467905	0.231066	0.395126
ENSMUSG00000000171	Sdhd	SDHD	6392	0	0	0	-0.00596903	0.000622378	0.00253833	0.00306576	0.0551785	0.111943	0.00665875	0.0129076	0.0528879
ENSMUSG00000000184	Ccnd2	CCND2	894	0	1	0	0.0123332	3.24e-05	0.0006336	-0.0355458	2.71e-06	0.00159313	-0.000632875	0.74668	0.843906
ENSMUSG00000000194	Gpr107	GPR107	57720	0	0	0	4.49e-05	0.954115	0.962275	-0.0074964	0.00163357	0.00937513	0.00794946	0.0056972	0.0325659
ENSMUSG00000000223	Drp2	DRP2	1821	0	0	0	-0.00359813	0.0195183	0.0319532	0.00737373	0.0101154	0.030533	-0.0030773	0.357375	0.530534
ENSMUSG00000000253	Gmpr	GMPR	2766	0	0	0	-0.0173507	0.000432255	0.002066	0.0119053	0.0117814	0.0341559	-0.0203615	0.00685717	0.0362505
ENSMUSG00000000266	Mid2	MID2	11043	0	0	0	0.00208732	0.272443	0.326362	0.00238511	0.452943	0.57155	0.00447972	0.355937	0.528914
ENSMUSG00000000275	Trim25	TRIM25	7706	0	0	0	-0.0135636	0.000210927	0.00142059	0.00106024	0.646506	0.742052	-0.00823791	0.0423381	0.12075
ENSMUSG00000000276	Dgke	DGKE	8526	0	0	0	-0.00518845	0.0388907	0.058554	-0.00473798	0.223529	0.336588	-0.00646973	0.266434	0.433818
ENSMUSG00000000278	Scpep1	SCPEP1	59342	1	0	0	0.0205118	1.48e-05	0.000458215	-0.014289	0.000503409	0.00533735	-0.005528	0.0740465	0.178073
ENSMUSG00000000282	Mnt	MNT	4335	0	0	0	0.00125457	0.424985	0.482277	-0.00313672	0.258446	0.374635	0.0114428	0.0206913	0.0731257
ENSMUSG00000000290	Itgb2	ITGB2	3689	0	0	0	0.00280947	0.033571	0.0514264	-0.00784145	0.0049965	0.0186068	-0.00885655	0.0157208	0.0607383
ENSMUSG00000000295	Hddc2	HDDC2	51020	0	0	0	-0.00725979	0.000801049	0.00294284	-0.00827782	0.00329187	0.0141522	-0.0130147	0.00280166	0.0226844
ENSMUSG00000000296	Tpd52l1	TPD52L1	7164	0	0	0	0.00495686	0.0192396	0.0315467	0.00147423	0.621197	0.720228	-0.0146519	0.0116534	0.0493771
ENSMUSG00000000301	Pemt	PEMT	10400	0	0	0	0.00689614	0.00825498	0.0155222	0.00240939	0.479002	0.596407	-0.00192529	0.703894	0.816564
ENSMUSG00000000317	Bcl6b	BCL6B	255877	0	0	0	-0.0119784	0.00041049	0.00200856	0.0152105	0.00114895	0.00773972	-0.00704941	0.0885625	0.201997
ENSMUSG00000000325	Arvcf	ARVCF	421	0	0	0	-0.0124512	0.00142823	0.0042329	0.00377333	0.325185	0.447144	0.00351201	0.535066	0.691422
ENSMUSG00000000326	Comt	COMT	1312	0	0	0	0.00324436	0.00127483	0.00392043	-0.00209474	0.0541949	0.110436	0.00387977	0.0243448	0.0818407
ENSMUSG00000000339	Rtca	RTCA	8634	0	0	0	0.00436525	0.000207955	0.00141326	-0.000764525	0.313893	0.434896	0.00234751	0.0636428	0.159421
ENSMUSG00000000340	Dbt	DBT	1629	0	0	0	0.00530275	0.00998287	0.0181247	-0.0133602	0.00247474	0.0119154	0.00483374	0.258311	0.425558
ENSMUSG00000000346	Dazap2	DAZAP2	9802	0	0	0	-0.00444418	0.00092465	0.00319288	0.00151133	0.218629	0.330573	0.00609823	0.00919344	0.0426319
ENSMUSG00000000355	Mcts1	MCTS1	28985	0	0	0	-0.00544677	0.00611626	0.0122027	-0.015526	0.00107981	0.00751701	6.76e-05	0.98544	0.992293
ENSMUSG00000000359	Rem1	REM1	28954	0	0	0	-0.0155284	0.000446678	0.00209684	0.00642376	0.0810359	0.151727	-0.00968191	0.0802749	0.187724
ENSMUSG00000000374	Trappc10	TRAPPC10	7109	0	0	0	-0.00206539	0.3334	0.390388	-0.00250308	0.487242	0.604036	-0.0121097	0.0511494	0.137585
ENSMUSG00000000378	Ccm2	CCM2	83605	0	0	0	0.00700227	0.0160623	0.0270146	0.00111223	0.782599	0.849614	-0.000269418	0.964269	0.981687
ENSMUSG00000000384	Tbrg4	TBRG4	9238	0	0	0	0.013644	8.58e-05	0.000930381	0.000943253	0.609399	0.710799	0.000455406	0.868706	0.925412
ENSMUSG00000000399	Ndufa9	NDUFA9	4704	0	0	0	0.00044429	0.485311	0.541549	-0.00481792	0.00359677	0.0149709	-0.00484492	0.0176981	0.0657998
ENSMUSG00000000409	Lck	LCK	3932	0	0	0	0.00244054	0.0864318	0.118527	-0.0324982	4.82e-05	0.00257001	-0.00423867	0.224436	0.387965
ENSMUSG00000000420	Galnt1	GALNT1	2589	0	0	0	-0.00645616	0.0128547	0.0223391	-0.00344105	0.339075	0.461898	-0.00451738	0.402272	0.574459
ENSMUSG00000000435	Myf5	MYF5	4617	0	0	0	0.0398329	6.56e-06	0.000305067	0.0383874	9.14e-05	0.00291258	0.0102762	0.0530493	0.140624
ENSMUSG00000000439	Mkrn2	MKRN2	23609	0	0	0	0.00755525	0.000217308	0.00144257	0.000169725	0.896209	0.931491	0.000767761	0.693426	0.810378
ENSMUSG00000000440	Pparg	PPARG	5468	0	0	0	0.00575958	0.00585848	0.011814	0.034016	7.51e-05	0.00274839	-0.0140817	0.00770542	0.0385946
ENSMUSG00000000441	Raf1	RAF1	5894	0	0	0	0.0268977	0.00143864	0.00425161	0.00663936	0.418353	0.539872	-0.00559938	0.64571	0.777022
ENSMUSG00000000532	Acvr1b	ACVR1B	91	0	0	0	-0.000627541	0.736012	0.775613	0.00177825	0.582957	0.687626	-0.00338958	0.489195	0.651729
ENSMUSG00000000538	Tom1l2	TOM1L2	146691	0	0	0	0.00623023	0.000299563	0.00170054	0.00428662	0.00741337	0.0243145	0.0170857	0.000240122	0.0116398
ENSMUSG00000000555	Itga5	ITGA5	3678	0	0	0	0.0289241	1.44e-05	0.000458215	0.0310019	0.000102885	0.00300496	-0.00422246	0.2899	0.458961
ENSMUSG00000000561	Wdr77	WDR77	79084	0	0	0	0.00434796	0.000335315	0.00179383	-0.0207443	4.2e-06	0.001716	0.0148262	0.000121329	0.0101511
ENSMUSG00000000563	Atp5f1	ATP5PB	515	0	0	0	-0.0021445	0.00062028	0.00253338	-0.00187167	0.00669939	0.0227686	-0.0126771	2.55e-05	0.00705467
ENSMUSG00000000567	Sox9	SOX9	6662	0	0	0	-0.00102089	0.427553	0.484854	0.0129784	0.00130367	0.00827217	-0.00921802	0.0220736	0.0764292
ENSMUSG00000000568	Hnrnpd	HNRNPD	3184	0	0	0	0.00215331	0.0640858	0.0910129	-0.00116952	0.511293	0.624846	-0.00348577	0.215256	0.376884
ENSMUSG00000000579	Dynlt1c	NA	NA	0	0	0	-0.00868855	0.00130935	0.00399095	0.00536662	0.0644308	0.126756	-0.0005526	0.884573	0.935606
ENSMUSG00000000581	C1d	C1D	10438	0	0	0	-0.00393771	0.00956521	0.0174886	-0.00049345	0.805203	0.867456	0.00120331	0.688385	0.806382
ENSMUSG00000000594	Gm2a	GM2A	2760	0	0	0	-0.00665656	0.00050035	0.00224383	0.00901741	0.00112098	0.00766527	-0.00648976	0.0173812	0.0649174
ENSMUSG00000000600	Krit1	KRIT1	889	0	0	0	-0.00434413	0.00212649	0.00553389	-0.00358215	0.0393808	0.0865378	-0.0117178	0.00191617	0.0195027
ENSMUSG00000000605	Clcn4	CLCN4	1183	0	0	0	-0.00487961	0.00170953	0.00477816	0.00127511	0.416127	0.538213	0.00467023	0.0750949	0.17965
ENSMUSG00000000627	Sema4f	SEMA4F	10505	0	0	0	0.0165063	5.07e-05	0.000736986	-0.0130748	0.000893094	0.00690338	0.0109179	0.00714659	0.0369941
ENSMUSG00000000628	Hk2	HK2	3099	0	0	0	0.0354018	3.36e-05	0.000648202	0.000143984	0.969639	0.980611	-0.022122	0.00576914	0.0327864
ENSMUSG00000000631	Myo18a	MYO18A	399687	0	0	0	-0.0118838	0.000150262	0.00120631	0.0103623	0.00158374	0.009207	0.00672721	0.0397325	0.115044
ENSMUSG00000000686	Abhd15	ABHD15	116236	0	0	0	-0.00857301	0.0109389	0.0195655	0.00336318	0.458822	0.576742	-0.000883895	0.895487	0.942172
ENSMUSG00000000693	Loxl3	LOXL3	84695	0	0	0	-0.0150335	8.98e-05	0.000953864	0.0177487	0.000354458	0.00472235	-0.0122313	0.00537552	0.0315536
ENSMUSG00000000708	Kat2b	KAT2B	8850	0	0	0	-0.0114399	4.08e-05	0.000680397	0.0105183	0.000438199	0.00504628	0.000352421	0.855069	0.916861
ENSMUSG00000000711	Rab5b	RAB5B	5869	0	0	0	-0.00329198	0.0233751	0.0373271	-0.00101184	0.626029	0.724509	0.0100166	0.0125541	0.0519295
ENSMUSG00000000738	Spg7	SPG7	6687	0	0	0	0.00274082	0.0440337	0.065242	0.00239094	0.256419	0.372655	-0.00395524	0.218932	0.381796
ENSMUSG00000000740	Rpl13	RPL13	6137	0	0	0	0.00162796	0.0106641	0.0191699	-0.000182912	0.829598	0.885153	-0.0206516	3.15e-05	0.0075075
ENSMUSG00000000743	Chmp1a	CHMP1A	5119	0	0	0	-0.00971704	3.5e-05	0.00065398	2.71e-05	0.979396	0.987162	-0.00591136	0.00667413	0.0356375
ENSMUSG00000000751	Rpa1	RPA1	6117	0	1	0	-0.0199082	8.74e-08	0.000105368	0.0013904	0.0263802	0.0633079	-0.0112715	5.06e-05	0.00807156
ENSMUSG00000000753	Serpinf1	SERPINF1	5176	1	0	0	0.0123985	1.42e-05	0.000456315	-0.0221132	1.15e-05	0.00213819	-0.00773644	0.00285673	0.022918
ENSMUSG00000000759	Tubgcp3	TUBGCP3	10426	0	1	0	-0.000308772	0.784017	0.817831	0.0051628	0.0287709	0.067585	-0.00521491	0.107699	0.232073
ENSMUSG00000000776	Polr3d	POLR3D	661	0	0	0	0.016749	1.52e-05	0.000460611	0.00192063	0.225114	0.338346	-0.000581087	0.797176	0.878837
ENSMUSG00000000782	Tcf7	TCF7	6932	0	0	0	-0.00401907	0.00638225	0.0126042	0.00665846	0.00789441	0.02544	-0.00694179	0.0346844	0.104666
ENSMUSG00000000787	Ddx3x	DDX3X	1654	0	0	0	0.00599155	0.000365385	0.00187025	-0.00516994	0.00390682	0.0157843	0.00859733	0.00270909	0.0224487
ENSMUSG00000000791	Il12rb1	IL12RB1	3594	0	0	0	0.00228374	0.179879	0.226832	0.00662814	0.0403817	0.0882627	0.0170983	0.00454948	0.0291534
ENSMUSG00000000804	Usp32	USP32	84669	0	0	0	-0.00204699	0.258846	0.311968	3.47e-05	0.990742	0.994218	-0.00840869	0.0927808	0.208981
ENSMUSG00000000811	Txnrd3	TXNRD3	114112	0	0	0	0.0255037	0.00572762	0.0116157	-0.00372185	0.743824	0.820019	0.00133325	0.937512	0.965967
ENSMUSG00000000823	Zfp512b	ZNF512B	57473	0	0	0	-0.0088836	0.00185586	0.00506828	0.00251996	0.390582	0.513892	-0.00199622	0.645903	0.777022
ENSMUSG00000000826	Dnajc5	DNAJC5	80331	0	0	0	0.00362191	0.00150157	0.0043911	0.00138237	0.231742	0.345333	0.0107144	0.000986364	0.0152021
ENSMUSG00000000827	Tpd52l2	TPD52L2	7165	0	0	0	0.00316059	0.000346941	0.00182903	-0.000459969	0.462479	0.58051	0.00228972	0.0373631	0.110282
ENSMUSG00000000838	Fmr1	FMR1	2332	0	0	0	-0.00290508	0.0463862	0.0683478	0.00167526	0.446425	0.565901	0.00253969	0.44444	0.613169
ENSMUSG00000000876	Pxmp4	PXMP4	11264	0	0	0	-0.00706662	0.00844554	0.0158181	0.00694699	0.0765191	0.145339	0.00950103	0.100904	0.222117
ENSMUSG00000000881	Dlg3	DLG3	1741	0	0	0	-0.0141291	0.000147203	0.00119348	0.00588786	0.0268559	0.0641401	-0.00363082	0.288541	0.457457
ENSMUSG00000000884	Gnb1l	GNB1L	54584	0	0	0	-0.00523431	0.0023889	0.00601144	0.00333897	0.100045	0.178914	-0.00423014	0.155169	0.298702
ENSMUSG00000000901	Mmp11	MMP11	4320	0	0	0	0.00819339	0.00112037	0.00361756	-0.0219841	0.00024222	0.00398132	-0.02078	0.00122684	0.0163578
ENSMUSG00000000902	Smarcb1	SMARCB1	6598	0	0	0	-0.0053372	0.000569843	0.00240641	-0.0162879	6.83e-05	0.00271749	-0.0179142	0.000228584	0.0116087
ENSMUSG00000000915	Hip1r	HIP1R	9026	0	0	0	0.0102327	0.000201136	0.00138781	0.0139589	0.000444056	0.00509018	0.0127491	0.00242614	0.0214159
ENSMUSG00000000916	Nsun5	NSUN5	55695	0	0	0	0.00656837	0.000467133	0.0021531	-0.00324438	0.0473051	0.099553	0.0124335	0.00133549	0.0170647
ENSMUSG00000000934	Top1mt	TOP1MT	116447	0	0	0	0.00738474	0.0019076	0.00514936	-0.00736474	0.0162023	0.0435103	-0.00356451	0.341193	0.514534
ENSMUSG00000000938	Hoxa10	HOXA10	3206	0	0	0	-0.00827262	5e-05	0.000731051	-0.00889869	0.000301049	0.00439286	0.0053016	0.00801425	0.0393658
ENSMUSG00000000957	Mmp14	MMP14	4323	0	0	0	-0.0068381	0.00498584	0.0103894	0.0136968	0.00299851	0.0133839	-0.0099503	0.0514533	0.137884
ENSMUSG00000000959	Oxa1l	OXA1L	5018	0	0	0	-0.0039399	0.0235109	0.0374999	0.00568958	0.048746	0.101855	-0.0161447	0.00388208	0.0267053
ENSMUSG00000000976	Heatr6	HEATR6	63897	0	0	0	0.00418864	0.0201363	0.0328521	0.00641857	0.0342601	0.0775035	0.0069728	0.0997732	0.220306
ENSMUSG00000001016	Ilf2	ILF2	3608	0	0	0	-0.00107231	0.0125878	0.0219553	-0.00126874	0.0577281	0.116126	0.00337862	0.00595664	0.0333876
ENSMUSG00000001017	Chtop	CHTOP	26097	0	0	0	0.00390746	0.00108619	0.00354214	0.00155995	0.175365	0.278441	0.00292677	0.103086	0.225376
ENSMUSG00000001018	Snapin	SNAPIN	23557	0	0	0	-0.0059558	0.000663374	0.00262825	-0.00768749	0.00172596	0.00962658	-0.00100238	0.636589	0.77008
ENSMUSG00000001020	S100a4	S100A4	6275	0	0	0	-0.0139563	6.38e-06	0.000305067	0.0128547	0.000105507	0.00300496	-0.00748519	0.00297893	0.0233861
ENSMUSG00000001021	S100a3	S100A3	6274	0	0	0	-0.00585578	0.00671547	0.0131257	-0.00569459	0.06616	0.129424	0.00462624	0.277333	0.446732
ENSMUSG00000001025	S100a6	S100A6	6277	0	0	0	-0.00557986	0.00282675	0.00679941	-0.00158692	0.444501	0.564321	-0.00192288	0.536111	0.692088
ENSMUSG00000001034	Mapk7	MAPK7	5598	0	0	0	0.00429045	0.035292	0.053696	0.0138406	0.0030618	0.0135404	0.00120141	0.788612	0.873267
ENSMUSG00000001036	Epn2	EPN2	22905	0	0	0	-0.00881623	0.000819668	0.00297907	0.00477786	0.0617399	0.122559	-0.00888439	0.0280156	0.0901541
ENSMUSG00000001039	B9d1	B9D1	27077	0	0	0	-0.00257816	0.0531242	0.0771049	-0.00116555	0.562931	0.671267	0.00468109	0.150958	0.29375
ENSMUSG00000001052	Sec24b	SEC24B	10427	0	0	0	0.0100138	0.00848837	0.0158853	0.00388056	0.436871	0.556921	0.00183547	0.80385	0.882737
ENSMUSG00000001053	N4bp3	N4BP3	23138	0	0	0	-0.0149508	0.000456206	0.00213015	-0.000727553	0.818882	0.876662	0.00582535	0.244674	0.41118
ENSMUSG00000001054	Rmnd5b	RMND5B	64777	0	0	0	-0.00439191	0.00219572	0.00565234	0.00216082	0.177129	0.280503	0.00292871	0.219742	0.382798
ENSMUSG00000001056	Nhp2	NHP2	55651	0	1	0	0.00230378	0.000701311	0.00271782	-0.00546398	0.000221416	0.003845	0.00230507	0.0234246	0.079615
ENSMUSG00000001062	Vps9d1	VPS9D1	9605	0	0	0	0.00343137	0.00171827	0.00479907	0.00234486	0.0605506	0.120679	-0.00375069	0.0483792	0.132851
ENSMUSG00000001065	Zfp276	ZNF276	92822	0	0	0	0.00055694	0.628992	0.678516	-0.00174822	0.387486	0.510814	0.00406266	0.201144	0.359833
ENSMUSG00000001082	Mfsd10	MFSD10	10227	0	0	0	0.00092444	0.526822	0.582472	0.00546111	0.0579941	0.116579	-0.000857123	0.819311	0.892581
ENSMUSG00000001089	Luzp1	LUZP1	7798	0	0	0	0.00314905	0.00305761	0.00719584	0.00126446	0.30022	0.420124	-0.00225274	0.229972	0.39408
ENSMUSG00000001098	Kctd10	KCTD10	83892	0	0	0	0.00203267	0.0240524	0.0382397	0.00170968	0.207911	0.318194	-0.0108075	0.00160621	0.018377
ENSMUSG00000001100	Poldip2	POLDIP2	26073	0	0	0	0.000605658	0.535537	0.591023	-0.00691622	0.0046958	0.0178422	-0.00518964	0.0694825	0.169937
ENSMUSG00000001105	Ift20	IFT20	90410	0	0	0	-0.011255	0.000246853	0.00154203	-0.00907285	0.00328724	0.0141429	0.0105197	0.0088903	0.0418496
ENSMUSG00000001119	Col6a1	COL6A1	1291	0	0	0	-0.00217495	0.197936	0.246746	0.0246513	0.000308741	0.00446785	-0.00732864	0.106685	0.230627
ENSMUSG00000001120	Pcbp3	PCBP3	54039	0	0	0	-0.00420724	0.0110511	0.0197323	0.00819141	0.00712972	0.0237312	0.00770999	0.0461518	0.128399
ENSMUSG00000001123	Lgals9	LGALS9	3965	0	0	0	-0.00749579	5.99e-05	0.00079987	0.0124933	6.73e-05	0.00271749	-0.00539056	0.00586407	0.0331388
ENSMUSG00000001127	Araf	ARAF	369	0	0	0	-0.00419508	0.006825	0.0133035	-0.0120202	0.00116565	0.00778914	0.00232558	0.436418	0.605754
ENSMUSG00000001131	Timp1	TIMP1	7076	0	0	0	-0.00313549	0.00033243	0.00179383	-0.0250649	2.62e-07	0.00074932	-0.0136132	4.48e-05	0.00807156
ENSMUSG00000001134	Uxt	UXT	8409	0	0	0	-0.00274571	0.072128	0.101207	-0.00882142	0.00660918	0.0225295	-0.00541259	0.153656	0.297199
ENSMUSG00000001138	Cnnm3	CNNM3	26505	0	0	0	-0.00588861	0.0037153	0.00830508	0.000865434	0.711811	0.795071	0.00459554	0.216565	0.378707
ENSMUSG00000001143	Lman2l	LMAN2L	81562	0	0	0	0.00233842	0.0421961	0.0628464	0.00489058	0.0208462	0.0528984	0.00331767	0.221187	0.38444
ENSMUSG00000001150	Mcm3ap	MCM3AP	8888	0	0	0	-0.00692447	0.00105105	0.00348003	0.00217088	0.269055	0.386391	-0.00146827	0.606929	0.7486
ENSMUSG00000001151	Pcnt	PCNT	5116	0	1	0	-0.00995145	0.00205629	0.0054103	0.00539547	0.136144	0.229477	0.00887548	0.10885	0.23385
ENSMUSG00000001156	Mxd1	MXD1	4084	0	0	0	0.00717874	0.012871	0.0223571	0.0160755	0.0047521	0.0179656	0.0202779	0.00944808	0.0434255
ENSMUSG00000001157	Gmcl1	GMCL1	64395	0	0	0	0.00333709	0.120369	0.158936	0.0037436	0.284006	0.402906	-0.00161708	0.749643	0.845531
ENSMUSG00000001158	Snrnp27	SNRNP27	11017	0	0	0	0.00309075	0.0244102	0.038726	-0.00292269	0.16471	0.265206	0.00255219	0.397124	0.569097
ENSMUSG00000001173	Ocrl	OCRL	4952	0	0	0	-0.00327993	0.0776041	0.107807	-0.00482245	0.122077	0.210452	-0.00620486	0.177085	0.327967
ENSMUSG00000001175	Calm1	CALM1	801	0	0	0	-0.00552164	0.000153934	0.00122377	-0.00275137	0.0133725	0.0375782	-0.00477151	0.00732264	0.0374812
ENSMUSG00000001211	Agpat3	AGPAT3	56894	0	0	0	0.00064169	0.348704	0.40623	0.00307719	0.0273087	0.0648694	-0.00881143	0.00217552	0.0205975
ENSMUSG00000001228	Uhrf1	UHRF1	29128	0	0	0	-0.0141853	4.9e-05	0.000722914	0.0044189	0.0291738	0.0682782	0.0112014	0.00353977	0.0254206
ENSMUSG00000001229	Dpp9	DPP9	91039	0	0	0	-0.00158705	0.16394	0.208897	-0.000324757	0.85912	0.90492	0.000712814	0.794385	0.877497
ENSMUSG00000001248	Gramd1a	GRAMD1A	57655	0	0	0	0.00515317	0.141926	0.183918	0.010895	0.0815642	0.152342	-0.0132772	0.143707	0.283205
ENSMUSG00000001270	Ckb	CKB	1152	0	0	0	-0.00854784	0.000313024	0.00173498	0.0123347	0.000562762	0.00563748	0.00501674	0.070013	0.170801
ENSMUSG00000001280	Sp1	SP1	6667	0	0	0	0.000903095	0.483935	0.540171	0.00570611	0.0311801	0.0719443	0.0116939	0.00858767	0.0411507
ENSMUSG00000001281	Itgb7	ITGB7	3695	1	0	0	0.0406432	0.000844493	0.00303708	0.00921938	0.382819	0.506634	-0.00904682	0.564285	0.715759
ENSMUSG00000001285	Myg1	C12orf10	60314	0	0	0	-0.00307706	0.0142989	0.0244294	-0.00618267	0.00807579	0.0259005	0.0173361	0.000876661	0.0147588
ENSMUSG00000001288	Rarg	RARG	5916	0	0	0	-0.00150831	0.148524	0.191557	0.0124971	0.000581469	0.00569521	-0.00891619	0.00819921	0.0398845
ENSMUSG00000001289	Pfdn5	PFDN5	5204	0	0	0	-0.00117228	0.168642	0.214244	0.0043861	0.0128749	0.0365421	-0.00314457	0.155781	0.299468
ENSMUSG00000001300	Efnb2	EFNB2	1948	0	0	0	-0.00728702	0.00136792	0.00411599	-0.00364345	0.122369	0.210861	-0.00845321	0.0298412	0.094378
ENSMUSG00000001305	Rrp15	RRP15	51018	0	0	0	0.0066393	0.000658042	0.00261969	-0.00680024	0.00387998	0.0157276	-0.0138154	0.00136294	0.0171529
ENSMUSG00000001313	Rnd2	RND2	8153	0	0	0	0.00918929	0.00142963	0.00423453	0.00513448	0.0942886	0.170975	0.00809815	0.0820249	0.19062
ENSMUSG00000001323	Srr	SRR	63826	0	0	0	-0.00314212	0.0294296	0.045775	-0.000481417	0.818198	0.876176	0.00139838	0.656552	0.783698
ENSMUSG00000001333	Sync	SYNC	81493	0	0	0	0.0251978	0.000309091	0.00172404	0.0159884	0.010828	0.0321354	0.00268068	0.708513	0.818761
ENSMUSG00000001349	Cnn1	CNN1	1264	0	0	0	0.013711	8.38e-05	0.000913891	0.0142407	0.000524738	0.00546995	-0.01705	0.0011479	0.0159539
ENSMUSG00000001366	Fbxo9	FBXO9	26268	0	0	0	0.0208755	0.000777448	0.00288579	0.00345595	0.509118	0.622921	-0.00644617	0.417799	0.588406
ENSMUSG00000001376	Vps50	VPS50	55610	0	0	0	-0.00167375	0.244319	0.296175	0.00249868	0.30385	0.424012	-0.00110022	0.755812	0.849655
ENSMUSG00000001380	Hars	HARS	3035	0	0	0	0.00717593	0.000107867	0.00102997	-0.00795977	0.000523776	0.00546995	0.00476106	0.0149684	0.0587035
ENSMUSG00000001383	Zmat2	ZMAT2	153527	0	0	0	-0.00574428	0.000263549	0.00159271	5.31e-05	0.959342	0.973985	0.00809042	0.00205726	0.0200665
ENSMUSG00000001403	Ube2c	UBE2C	11065	0	1	0	-0.00133412	0.0182057	0.0300495	0.000106535	0.893041	0.929326	0.00353508	0.0173454	0.0648891
ENSMUSG00000001415	Smg5	SMG5	23381	0	0	0	0.0167504	0.00668129	0.0130656	0.00047911	0.951007	0.968917	-0.0015463	0.894266	0.941775
ENSMUSG00000001416	Cct3	CCT3	7203	0	0	0	0.00521592	0.000154458	0.00122491	-0.00482452	0.00132893	0.00834413	0.00786528	0.00101766	0.0153995
ENSMUSG00000001418	Glmp	GLMP	112770	0	0	0	0.0030286	0.00948663	0.0173782	0.0136217	0.000324563	0.00454645	-0.000394489	0.863574	0.922436
ENSMUSG00000001419	Mef2d	MEF2D	4209	0	0	0	0.0123247	8.31e-05	0.000911471	0.0149442	0.000300262	0.00438697	0.00995075	0.0051403	0.0307236
ENSMUSG00000001424	Snd1	SND1	27044	0	0	0	4.52e-05	0.931665	0.944629	-0.00227138	0.0365434	0.081398	0.0143676	0.000184703	0.01114
ENSMUSG00000001435	Col18a1	COL18A1	80781	1	0	0	0.00102387	0.316728	0.372798	0.00394913	0.047214	0.0994345	-0.0141089	0.001691	0.0185922
ENSMUSG00000001436	Slc19a1	SLC19A1	6573	0	0	0	0.0144138	0.000224213	0.00146294	-0.00884762	0.00853724	0.0268784	-0.000999119	0.789293	0.873852
ENSMUSG00000001440	Kpnb1	KPNB1	3837	0	0	0	0.00137955	0.229434	0.28108	-0.00340666	0.100889	0.180254	0.00397093	0.187246	0.341641
ENSMUSG00000001441	Npepps	NPEPPS	9520	0	0	0	-0.0064955	0.00912561	0.0168192	0.0102429	0.0140914	0.0391087	0.00509124	0.31465	0.486892
ENSMUSG00000001445	Mrpl10	MRPL10	124995	0	0	0	-0.00166182	0.0967875	0.131051	-0.00139014	0.379969	0.504216	-0.00545779	0.045181	0.126529
ENSMUSG00000001467	Cyp51	CYP51A1	1595	0	0	1	-0.0147924	0.00019257	0.00136829	0.0158721	0.000974738	0.00717825	0.0135027	0.00735017	0.0375216
ENSMUSG00000001472	Tcf25	TCF25	22980	0	0	0	0.00394315	0.00329537	0.00759295	0.0017952	0.254783	0.370829	0.0048624	0.0614697	0.155441
ENSMUSG00000001473	Tubb6	TUBB6	84617	0	1	0	0.00472931	7.61e-05	0.000873204	0.000304183	0.62389	0.722435	0.0213366	7.34e-06	0.0067496
ENSMUSG00000001482	Def8	DEF8	54849	0	0	0	-0.0116887	0.000912675	0.00317067	0.00885967	0.0199727	0.0511961	0.00569403	0.239302	0.404554
ENSMUSG00000001506	Col1a1	COL1A1	1277	0	0	0	-0.00133772	0.215372	0.266075	0.00402621	0.0489868	0.102115	-0.010828	0.00477351	0.029622
ENSMUSG00000001507	Itga3	ITGA3	3675	0	0	0	-0.016142	4.91e-05	0.000722914	0.0098606	0.00208287	0.0106948	-0.0310589	0.000163287	0.0111191
ENSMUSG00000001508	Sgca	SGCA	6442	0	0	0	0.00343972	0.0818941	0.113039	0.00617239	0.073301	0.140533	0.00580478	0.229115	0.3932
ENSMUSG00000001510	Dlx3	DLX3	1747	0	0	0	-0.00571008	0.00428225	0.00921019	0.0231218	0.000225524	0.003845	-0.00310825	0.390649	0.562535
ENSMUSG00000001517	Foxm1	FOXM1	2305	0	1	0	-0.00813682	0.000389161	0.00195606	0.0104967	0.00103357	0.00736239	0.00825447	0.0108961	0.0475126
ENSMUSG00000001518	Itfg2	ITFG2	55846	0	0	0	0.0135347	0.00011958	0.00107801	-0.00556796	0.0231988	0.0574399	0.00611078	0.0718415	0.174198
ENSMUSG00000001520	Nrip2	NRIP2	83714	1	0	0	0.000192009	0.874048	0.895897	-0.00993393	0.00284082	0.0129964	-0.0118623	0.00670175	0.0356771
ENSMUSG00000001521	Tulp3	TULP3	7289	0	0	0	0.00224864	0.0616941	0.0880959	-0.00881275	0.00263776	0.0124087	-0.00652526	0.0422676	0.120674
ENSMUSG00000001524	Gtf2h4	GTF2H4	2968	0	0	0	0.000495951	0.713413	0.755759	-0.00512186	0.0570894	0.115036	0.000129359	0.970501	0.98533
ENSMUSG00000001525	Tubb5	TUBB	203068	0	1	0	-0.00630374	1.42e-05	0.000456315	0.00182834	0.0116844	0.0339754	0.0118607	5.67e-05	0.00817748
ENSMUSG00000001542	Ell2	ELL2	22936	0	0	0	-0.00116775	0.552176	0.607394	0.00732366	0.058869	0.117862	-0.00215069	0.671502	0.794467
ENSMUSG00000001552	Jup	JUP	3728	0	0	0	-0.0263434	1.81e-05	0.000498949	0.0400245	3.04e-05	0.00236478	0.00473432	0.223955	0.387426
ENSMUSG00000001555	Fkbp10	FKBP10	60681	0	0	0	-0.00292312	0.000567133	0.00240333	0.00434845	0.000928147	0.00704112	-0.00516842	0.00203444	0.0200465
ENSMUSG00000001569	Nom1	NOM1	64434	0	0	0	0.00154583	0.129329	0.169417	-0.00585979	0.00766093	0.0248627	0.00645182	0.0271588	0.0884121
ENSMUSG00000001576	Ergic1	ERGIC1	57222	0	0	0	0.00210084	0.0109685	0.0196001	-0.00302408	0.0247618	0.0603483	-0.0110627	0.000888462	0.0147733
ENSMUSG00000001604	Tcea3	TCEA3	6920	0	0	0	-0.00785966	0.00252561	0.00626474	0.00558329	0.0769285	0.1459	0.00121849	0.771466	0.861044
ENSMUSG00000001627	Ifrd1	IFRD1	3475	0	0	0	0.0427686	0.000150087	0.00120631	0.0119525	0.104001	0.184746	0.0087445	0.392422	0.564195
ENSMUSG00000001630	Stk38l	STK38L	23012	0	0	0	0.0140168	4.06e-05	0.000680035	0.00952385	0.0012278	0.00800171	-0.0012217	0.606872	0.7486
ENSMUSG00000001632	Brpf1	BRPF1	7862	0	0	0	-0.000749669	0.772102	0.807095	-0.000247534	0.956185	0.972163	-0.00322314	0.633469	0.767414
ENSMUSG00000001642	Akr1b3	AKR1B1	231	0	0	0	0.00390738	0.00173645	0.00483975	-0.00196039	0.144879	0.240205	0.00198398	0.30598	0.477741
ENSMUSG00000001655	Hoxc13	HOXC13	3229	0	0	0	-0.00595745	0.00740018	0.0141829	-0.00711862	0.0350742	0.0788618	-0.0100573	0.0434557	0.123083
ENSMUSG00000001666	Ddt	DDT	1652	0	0	0	-0.00603777	0.013356	0.0230457	0.000696989	0.834053	0.88843	-0.00170805	0.73166	0.833934
ENSMUSG00000001674	Ddx18	DDX18	8886	0	0	0	0.00485932	0.00170035	0.00476672	-0.00951988	0.00113645	0.00770658	-0.0185293	0.000477535	0.0130286
ENSMUSG00000001687	Ubl3	UBL3	5412	0	0	0	-7.5e-05	0.929434	0.942618	-0.00778497	0.00191442	0.0102064	-0.0108417	0.00249301	0.0217372
ENSMUSG00000001700	Gramd3	GRAMD2B	65983	0	0	0	-0.00466844	0.135655	0.176733	-0.00610439	0.238487	0.353176	0.00165311	0.823668	0.895019
ENSMUSG00000001707	Eef1e1	EEF1E1	9521	0	0	0	0.0112492	0.000150262	0.00120631	-0.0118841	0.000836364	0.00669629	-0.0127924	0.00257972	0.0220239
ENSMUSG00000001729	Akt1	AKT1	207	0	1	0	-0.00293986	0.00414642	0.00899412	0.00424601	0.00870079	0.0272406	0.0033734	0.093773	0.21007
ENSMUSG00000001739	Cldn15	CLDN15	24146	0	0	0	-0.00390308	0.0185155	0.0304992	0.00527606	0.0502498	0.104117	0.00329214	0.357881	0.530882
ENSMUSG00000001750	Tcirg1	TCIRG1	10312	0	0	0	-0.0156107	8.04e-06	0.000339401	0.0131336	0.000179196	0.00351028	-0.0123064	0.00095743	0.01511
ENSMUSG00000001751	Naglu	NAGLU	4669	0	0	0	0.000199362	0.941369	0.952358	0.00254021	0.590592	0.6946	-0.019528	0.0235934	0.0800676
ENSMUSG00000001755	Coasy	COASY	80347	1	0	0	-0.0138152	0.000131906	0.00113109	-0.0281584	6.73e-05	0.00271749	-0.012666	0.00498855	0.0303075
ENSMUSG00000001761	Smo	SMO	6608	0	0	0	-0.00338478	0.0214809	0.0347486	0.00359126	0.116199	0.2023	-0.00517515	0.130289	0.264744
ENSMUSG00000001767	Crnkl1	CRNKL1	51340	0	0	0	-0.00327997	0.0460737	0.0679406	-0.0032832	0.204771	0.314272	0.00537185	0.174086	0.32425
ENSMUSG00000001768	Rin2	RIN2	54453	0	0	0	-0.0366774	0.000124301	0.00109807	0.010916	0.0760198	0.144631	0.00210751	0.796376	0.878378
ENSMUSG00000001774	Chordc1	CHORDC1	26973	0	0	0	-0.00040305	0.65419	0.702124	-0.00964311	0.00112841	0.00767539	0.00493997	0.0636718	0.159458
ENSMUSG00000001783	Rtcb	RTCB	51493	0	0	0	0.0094483	7.43e-05	0.000870002	-0.00252821	0.0696276	0.134892	0.00763372	0.00459239	0.029215
ENSMUSG00000001785	Pwp1	PWP1	11137	0	0	0	0.0106748	8.7e-05	0.00093983	-0.00191352	0.209041	0.319411	-0.00828654	0.00628191	0.0344122
ENSMUSG00000001786	Fbxo7	FBXO7	25793	0	0	0	0.00027439	0.87117	0.893348	0.0128572	0.00374913	0.0153783	-0.00315967	0.479221	0.642706
ENSMUSG00000001794	Capns1	CAPNS1	826	0	0	0	0.0014397	0.175935	0.222373	0.0021745	0.225592	0.338773	0.00200731	0.442017	0.610857
ENSMUSG00000001829	Clpb	CLPB	81570	0	0	0	0.00464632	0.003475	0.00790652	-0.00119265	0.513167	0.626666	-0.00619929	0.0493781	0.134561
ENSMUSG00000001833	Sept7	SEPT7	989	0	0	0	-0.0025785	0.00522264	0.0107886	-0.00478195	0.00414711	0.0163948	0.000389269	0.816911	0.890893
ENSMUSG00000001844	Zdhhc4	ZDHHC4	55146	0	0	0	0.00249765	0.0493698	0.0722238	-0.0033156	0.112645	0.197379	-0.00686806	0.040776	0.117471
ENSMUSG00000001847	Rac1	RAC1	5879	0	0	0	0.0190006	0.0432867	0.064295	0.00913289	0.516059	0.629126	0.014832	0.484869	0.647852
ENSMUSG00000001855	Nup214	NUP214	8021	0	1	0	0.00374367	0.00650376	0.0127862	0.00387012	0.0525358	0.107747	0.0106863	0.0046604	0.029294
ENSMUSG00000001864	Aif1l	AIF1L	83543	0	0	0	0.00301432	0.0385713	0.0581288	0.00743657	0.00945594	0.0290497	-0.00564321	0.112643	0.239722
ENSMUSG00000001870	Ltbp1	LTBP1	4052	0	0	0	0.0116979	0.000103322	0.00101715	-0.00273774	0.127842	0.218025	-0.00110933	0.655046	0.78288
ENSMUSG00000001891	Ugp2	UGP2	7360	0	0	0	-0.000415495	0.723686	0.764942	0.013262	0.000958741	0.00713134	-0.0011247	0.712837	0.821565
ENSMUSG00000001909	Trmt1	TRMT1	55621	0	0	0	0.0158314	3.58e-06	0.000271226	-0.00363188	0.0108735	0.0322102	-0.00986538	0.00122963	0.0163589
ENSMUSG00000001910	Nacc1	NACC1	112939	0	0	0	-0.00391565	0.0060479	0.0121092	0.00526781	0.0177936	0.0466451	-0.00535288	0.0747992	0.179317
ENSMUSG00000001911	Nfix	NFIX	4784	0	0	0	-0.0114635	0.000184528	0.00133249	0.0152613	0.00044528	0.0050991	0.00385761	0.199008	0.35679
ENSMUSG00000001918	Slc1a5	SLC1A5	6510	1	0	0	0.00651052	0.000441871	0.00208626	-0.0453747	1.05e-06	0.0010868	-0.00449521	0.0570851	0.147984
ENSMUSG00000001924	Uba1	UBA1	7317	0	0	0	0.000544667	0.396406	0.454215	-0.00592138	0.00172666	0.00962658	-0.00250629	0.154914	0.298571
ENSMUSG00000001942	Siae	SIAE	54414	0	0	0	-0.00768371	0.00121844	0.00380847	0.000346773	0.875181	0.916941	-0.00424941	0.223802	0.387337
ENSMUSG00000001962	Fam50a	FAM50A	9130	0	0	0	0.011825	6.64e-06	0.000305067	-0.00479313	0.00200734	0.0104809	0.0121358	0.000348252	0.0123215
ENSMUSG00000001964	Emd	EMD	2010	0	1	0	0.00790113	0.000446678	0.00209684	-0.000125759	0.940083	0.961257	0.00564366	0.0513416	0.137843
ENSMUSG00000001983	Taco1	TACO1	51204	0	0	0	-0.00210887	0.360707	0.418211	-0.00434363	0.279414	0.398465	-0.00392393	0.505137	0.665509
ENSMUSG00000001995	Sipa1l2	SIPA1L2	57568	0	0	0	0.00853737	0.00128164	0.00393083	0.00941115	0.00650245	0.0222719	-0.0265147	0.000720979	0.0140407
ENSMUSG00000001998	Ap4e1	AP4E1	23431	0	0	0	-0.00134779	0.446997	0.504255	0.00553286	0.097995	0.176129	0.00626199	0.194609	0.351321
ENSMUSG00000001999	Blvra	BLVRA	644	0	0	0	-0.0133342	6.41e-05	0.000826724	0.00665112	0.00539371	0.019626	-0.00363479	0.177044	0.327967
ENSMUSG00000002010	Idh3g	IDH3G	3421	0	0	0	-0.00290518	0.00288663	0.00689992	-0.00497769	0.0030583	0.0135346	-0.00445101	0.0238633	0.0806528
ENSMUSG00000002014	Ssr4	SSR4	6748	0	0	0	0.00412945	0.00137561	0.00412713	-0.00602174	0.00247806	0.0119264	0.00122947	0.508514	0.667746
ENSMUSG00000002015	Bcap31	BCAP31	10134	0	0	0	-0.00128306	0.151886	0.195541	-6.58e-05	0.963349	0.976927	-0.0057281	0.0269995	0.0881084
ENSMUSG00000002017	Fam98a	FAM98A	25940	0	0	0	-0.00444355	0.000306119	0.00171331	-0.0094378	0.000135927	0.00314343	0.0226947	1.93e-05	0.00689975
ENSMUSG00000002020	Ltbp2	LTBP2	4053	0	0	0	-0.00263644	0.00605953	0.0121212	0.000994488	0.411057	0.533525	0.00569109	0.0132946	0.0539709
ENSMUSG00000002028	Kmt2a	KMT2A	4297	0	0	0	-0.00217678	0.102625	0.137975	-0.00171086	0.416965	0.538931	-0.00393852	0.231689	0.395873
ENSMUSG00000002031	Ift46	IFT46	56912	0	0	0	-0.00896838	0.000358829	0.00185334	0.00227861	0.222257	0.334908	-0.000283619	0.91509	0.953963
ENSMUSG00000002043	Trappc6a	TRAPPC6A	79090	0	0	0	0.000918842	0.51054	0.566497	-0.00551848	0.0477149	0.100158	-0.00268646	0.460986	0.627893
ENSMUSG00000002052	Supt6	SUPT6H	6830	0	0	0	0.0116399	0.000377885	0.0019184	0.0118638	0.002216	0.0111553	0.0217387	0.00114117	0.0159539
ENSMUSG00000002055	Spag5	SPAG5	10615	0	0	0	0.0015291	0.0778544	0.108076	0.00010318	0.938504	0.960158	-0.000184945	0.926075	0.960373
ENSMUSG00000002057	Foxn1	FOXN1	8456	0	0	0	0.00532427	0.00498671	0.0103894	0.00128655	0.575985	0.681273	0.00819396	0.0421072	0.120336
ENSMUSG00000002058	Unc119	UNC119	9094	0	0	0	-0.00129279	0.433086	0.490206	-0.00333168	0.253483	0.369313	-0.0127219	0.016326	0.0622979
ENSMUSG00000002059	Rab34	RAB34	83871	0	0	0	-0.00015138	0.833508	0.861834	0.00552196	0.00362649	0.0150533	0.00589823	0.0139054	0.0557386
ENSMUSG00000002064	Sdf2	SDF2	6388	0	0	0	-0.0040793	0.00326241	0.00753067	-0.000498098	0.75026	0.825524	0.0216992	0.000290997	0.0119749
ENSMUSG00000002068	Ccne1	CCNE1	898	0	1	0	-0.0357187	1.49e-05	0.000458215	0.00109864	0.731591	0.811703	-0.00906728	0.0907951	0.20556
ENSMUSG00000002102	Psmc3	PSMC3	5702	0	1	0	-0.000304058	0.598736	0.651283	0.00779161	0.000506119	0.00535812	0.0142123	0.000262762	0.0119222
ENSMUSG00000002103	Acp2	ACP2	53	0	0	0	0.00186569	0.218636	0.269699	-0.00313017	0.227228	0.340514	-0.00431725	0.265999	0.433603
ENSMUSG00000002104	Rapsn	RAPSN	5913	0	0	0	-0.000353023	0.596863	0.649554	0.0117641	0.000195455	0.00372047	-0.00858747	0.00238051	0.0213201
ENSMUSG00000002105	Slc39a13	SLC39A13	91252	0	0	0	-0.0164289	6.41e-05	0.000826724	-0.00402022	0.0824018	0.153431	-0.0056981	0.0978429	0.217007
ENSMUSG00000002107	Celf2	CELF2	10659	0	0	0	-0.00905472	7.52e-06	0.000324637	0.00340248	0.0028667	0.0130866	-0.00877601	0.00046722	0.0130286
ENSMUSG00000002109	Ddb2	DDB2	1643	0	0	0	-0.00262088	0.201563	0.250803	0.00224739	0.50268	0.617175	0.000311351	0.950098	0.97333
ENSMUSG00000002129	Sf3a1	SF3A1	10291	0	0	0	0.00433287	0.00163995	0.00465558	-0.00172257	0.226195	0.33947	0.00833181	0.0048264	0.029765
ENSMUSG00000002205	Vrk3	VRK3	51231	0	0	0	-0.00681744	0.00778479	0.0147692	-0.00161637	0.623841	0.722435	0.00769514	0.1499	0.292339
ENSMUSG00000002210	Smg9	SMG9	56006	0	0	0	0.00658804	0.00404432	0.00882284	0.000391095	0.884206	0.922891	0.0112136	0.0227478	0.0778914
ENSMUSG00000002221	Paxip1	PAXIP1	22976	0	0	0	-0.00671468	0.00892211	0.016512	0.00223967	0.506733	0.620799	0.00181315	0.71831	0.825296
ENSMUSG00000002222	Rmnd5a	RMND5A	64795	0	0	0	0.00364859	0.05347	0.0775281	-0.00797068	0.0227316	0.0566558	0.00146034	0.732099	0.834184
ENSMUSG00000002227	Mov10	MOV10	4343	0	0	0	-0.0173829	0.000454808	0.0021271	0.0252454	0.000807517	0.00657041	-0.00637906	0.269823	0.438028
ENSMUSG00000002233	Rhoc	RHOC	389	0	0	0	0.0126534	2.15e-05	0.000533536	-0.000206987	0.865253	0.909036	0.00588188	0.0125859	0.0519794
ENSMUSG00000002249	Tead3	TEAD3	7005	0	0	0	0.00800012	0.00134231	0.00405921	0.0112988	0.00270603	0.0126574	0.000574662	0.870655	0.926281
ENSMUSG00000002250	Ppard	PPARD	5467	0	0	0	0.000800836	0.573512	0.627604	0.00574924	0.0448245	0.0955276	-0.0035358	0.349819	0.522855
ENSMUSG00000002257	Def6	DEF6	50619	0	0	0	-0.00874307	0.0116417	0.0205876	0.00401261	0.3959	0.519456	-0.00252808	0.717376	0.82472
ENSMUSG00000002265	Peg3	PEG3	5178	0	0	0	-0.0176467	2.81e-05	0.000600867	0.0192573	0.000169318	0.00347184	0.0072817	0.0270073	0.0881084
ENSMUSG00000002274	Metrn	METRN	79006	0	0	0	-0.00519142	0.00558147	0.0113757	0.00101022	0.661193	0.754078	-0.0138654	0.00516897	0.0307824
ENSMUSG00000002279	Lmf1	LMF1	64788	0	0	0	0.00321552	0.0295741	0.045981	-4.57e-05	0.982991	0.989739	-0.00240154	0.461873	0.628727
ENSMUSG00000002280	Narfl	CIAO3	64428	0	0	0	0.00106204	0.384821	0.442314	0.00747341	0.00780927	0.0252011	0.00523123	0.123283	0.255176
ENSMUSG00000002289	Angptl4	ANGPTL4	51129	1	0	0	-0.0177437	1.49e-05	0.000458215	-0.0413647	2.97e-06	0.00159313	0.0123954	0.00203208	0.0200405
ENSMUSG00000002297	Dbf4	DBF4	10926	0	1	0	0.00455911	0.136264	0.177426	-0.00209542	0.66622	0.75844	-0.00151713	0.834445	0.90297
ENSMUSG00000002307	Daxx	DAXX	1616	0	0	0	0.00120791	0.101879	0.137134	-0.00408856	0.00847509	0.0267758	0.00570023	0.0114032	0.0487857
ENSMUSG00000002308	Cd320	CD320	51293	0	0	0	-0.00286315	0.0143275	0.0244637	-0.00101209	0.529857	0.642047	-0.00779666	0.0122279	0.0509978
ENSMUSG00000002319	Ipo4	IPO4	79711	0	0	0	0.0137881	1.51e-05	0.000460611	-0.0033536	0.0260889	0.0627708	-0.00131496	0.48478	0.647808
ENSMUSG00000002320	Tm9sf1	TM9SF1	10548	0	0	0	-0.00326821	0.00439563	0.00938522	0.00352075	0.0310753	0.0717646	0.000474954	0.815498	0.889945
ENSMUSG00000002325	Irf9	IRF9	10379	0	0	0	-0.000116336	0.937932	0.949636	-0.000402252	0.877051	0.918647	-0.00126569	0.744756	0.842306
ENSMUSG00000002326	Gmpr2	GMPR2	51292	0	0	0	0.00331733	0.00387325	0.00855405	-0.00478213	0.00812841	0.02604	0.0105129	0.00197753	0.0198273
ENSMUSG00000002329	Mdp1	MDP1	145553	0	0	0	-0.000742252	0.657936	0.70535	0.00258501	0.380641	0.504991	-0.00299086	0.496614	0.658256
ENSMUSG00000002332	Dhrs1	DHRS1	115817	0	0	0	-0.00855573	0.000355157	0.00184392	0.00446937	0.0286958	0.0674363	0.00733841	0.0196675	0.0705759
ENSMUSG00000002342	Tmem161a	TMEM161A	54929	0	0	0	0.00648048	0.000210664	0.00142015	0.00240934	0.0573409	0.115428	0.00132681	0.43068	0.599827
ENSMUSG00000002343	Armc6	ARMC6	93436	0	0	0	0.00401336	0.00259904	0.00639144	0.003234	0.0525475	0.107751	0.00357321	0.130532	0.264908
ENSMUSG00000002345	Borcs8	BORCS8	729991	0	0	0	-0.0100261	0.000399038	0.00197704	-0.00311598	0.156341	0.254888	-0.00447118	0.174838	0.325332
ENSMUSG00000002346	Slc25a42	SLC25A42	284439	0	0	0	0.00143099	0.379938	0.437272	0.00187605	0.498248	0.614021	0.000453278	0.912238	0.952103
ENSMUSG00000002365	Snx9	SNX9	51429	0	0	0	0.00482151	0.00317089	0.00738019	0.00906052	0.00241434	0.0117375	-0.0101502	0.00721005	0.0371044
ENSMUSG00000002372	Ranbp3	RANBP3	8498	0	0	0	0.0029827	0.00136941	0.00411745	0.00579237	0.000940385	0.00708762	0.000435238	0.742731	0.840606
ENSMUSG00000002379	Ndufa11	NDUFA11	126328	0	0	0	-0.00248383	0.0355047	0.053991	-0.00113914	0.514068	0.627452	0.000857674	0.741568	0.839747
ENSMUSG00000002393	Nr2f6	NR2F6	2063	0	0	0	-0.00653557	0.00125892	0.00389165	0.00476707	0.0344613	0.0778048	-0.00279823	0.338761	0.512352
ENSMUSG00000002395	Use1	USE1	55850	0	0	0	0.00654953	0.000406381	0.00199528	0.00514185	0.00626844	0.0216751	0.00623464	0.0149196	0.0585925
ENSMUSG00000002396	Ocel1	OCEL1	79629	0	0	0	0.00290791	0.120717	0.15934	-0.000807347	0.784564	0.851234	-0.000271845	0.950815	0.973798
ENSMUSG00000002409	Dyrk1b	DYRK1B	9149	0	0	0	0.000516239	0.712226	0.754642	0.0171835	0.000713724	0.00620441	-0.0026065	0.479441	0.642927
ENSMUSG00000002413	Braf	BRAF	673	0	0	0	0.00457995	0.0122913	0.0215497	0.00120272	0.627173	0.725393	0.00309475	0.413129	0.584419
ENSMUSG00000002416	Ndufb2	NDUFB2	4708	0	0	0	-0.0044656	0.0101639	0.0184096	-0.00246365	0.29862	0.418517	0.00131864	0.702525	0.815845
ENSMUSG00000002428	Hltf	HLTF	6596	0	0	0	-0.011338	0.000482255	0.00219841	-0.00104789	0.668775	0.759987	-0.00142416	0.697923	0.812728
ENSMUSG00000002455	Prpf6	PRPF6	24148	0	0	0	-0.000280272	0.773467	0.808305	0.00584294	0.00944843	0.0290408	0.00953142	0.00670192	0.0356771
ENSMUSG00000002458	Rgs19	RGS19	10287	0	0	0	0.00341478	0.0116865	0.0206571	-0.00745938	0.00478864	0.018056	0.00552543	0.0736372	0.177299
ENSMUSG00000002459	Rgs20	RGS20	8601	0	0	0	0.0048466	0.0032035	0.00743257	-0.00444046	0.0411682	0.0894519	-0.00332686	0.252719	0.41967
ENSMUSG00000002477	Snrpd1	SNRPD1	6632	0	0	0	0.00445296	0.000445192	0.00209675	-0.000167219	0.858931	0.904887	0.0162517	0.00012736	0.0101655
ENSMUSG00000002486	Tchp	TCHP	84260	0	0	0	0.00696241	0.0176238	0.0292451	0.00314222	0.447426	0.566839	0.0159091	0.0306221	0.0959636
ENSMUSG00000002489	Tiam1	TIAM1	7074	0	0	0	-0.00975048	0.00195157	0.00523225	0.00318096	0.334517	0.457322	-0.0137868	0.0207689	0.073309
ENSMUSG00000002496	Tsc2	TSC2	7249	0	0	0	0.00127224	0.156169	0.200356	0.00179158	0.232222	0.345779	-0.0048629	0.050758	0.136983
ENSMUSG00000002504	Slc9a3r2	SLC9A3R2	9351	0	0	0	0.00268911	0.479456	0.535852	0.00853701	0.212005	0.322735	0.006394	0.51605	0.674082
ENSMUSG00000002524	Puf60	PUF60	22827	0	0	0	0.000397231	0.46259	0.519386	0.00428991	0.00300315	0.0133987	0.000426436	0.757621	0.850643
ENSMUSG00000002546	Golga2	GOLGA2	2801	0	1	0	-0.00436021	0.000146503	0.00119275	0.00935463	6.05e-05	0.0027044	-0.00509667	0.00228234	0.0209545
ENSMUSG00000002550	Uck1	UCK1	83549	0	0	0	0.000372329	0.559867	0.614848	0.00542178	0.00242692	0.0117594	0.00717143	0.00382858	0.0265288
ENSMUSG00000002580	Mien1	MIEN1	84299	0	0	0	0.00483286	0.00692963	0.0134753	0.00861388	0.00639694	0.0219865	0.00015365	0.963752	0.98125
ENSMUSG00000002602	Axl	AXL	558	0	0	0	-0.000350857	0.611448	0.662277	0.00374293	0.0141197	0.0391442	-0.0033836	0.0903009	0.204806
ENSMUSG00000002608	Ccdc97	CCDC97	90324	0	0	0	0.00661047	0.00186442	0.0050856	0.00677905	0.0139658	0.0388638	0.00911881	0.0216794	0.0753378
ENSMUSG00000002617	Zfp40	NA	NA	0	0	0	-0.00371565	0.12921	0.169301	-0.00151298	0.696239	0.782952	0.017487	0.0166162	0.0630896
ENSMUSG00000002625	Akap8l	AKAP8L	26993	0	0	0	0.00353006	0.0491602	0.0719633	-0.00590513	0.0563964	0.114009	0.0141512	0.00883374	0.0417423
ENSMUSG00000002635	Pdcd2l	PDCD2L	84306	0	0	0	0.00900455	0.000192395	0.00136829	0.0103954	0.000755682	0.00638479	-0.00753967	0.0104281	0.0460073
ENSMUSG00000002658	Gtf2f1	GTF2F1	2962	0	0	0	0.00477321	0.00017299	0.00130441	0.00412485	0.00181364	0.00989652	0.0216433	1.65e-05	0.0067496
ENSMUSG00000002660	Clpp	CLPP	8192	0	0	0	0.00992225	0.000436189	0.00207048	0.00273495	0.212007	0.322735	0.0116436	0.00692963	0.0364004
ENSMUSG00000002661	Alkbh7	ALKBH7	84266	0	0	0	-0.00158596	0.237305	0.28899	0.00394425	0.10421	0.185061	0.0046879	0.184356	0.338366
ENSMUSG00000002679	Med6	MED6	10001	0	0	0	0.00172391	0.176295	0.222778	-0.00449852	0.0567307	0.114543	0.0117213	0.00636224	0.0346426
ENSMUSG00000002718	Cse1l	CSE1L	1434	0	0	0	-0.0063558	0.000331119	0.0017899	-0.00276179	0.0521161	0.107116	-0.00241499	0.216172	0.378194
ENSMUSG00000002728	Naa20	NAA20	51126	0	0	0	-0.00364637	0.00149283	0.00437337	0.00188393	0.120283	0.208017	0.00100021	0.551034	0.704574
ENSMUSG00000002731	Prkra	PRKRA	8575	0	0	0	-0.0198568	1.53e-05	0.000460611	-0.00149344	0.410893	0.533373	-0.0215673	0.000478059	0.0130286
ENSMUSG00000002732	Fkbp7	FKBP7	51661	0	0	0	-0.00749545	0.00126722	0.00390965	0.0102059	0.00290184	0.0131578	0.0029342	0.379832	0.551571
ENSMUSG00000002733	Plekha3	PLEKHA3	65977	0	0	0	0.00201107	0.24054	0.292275	-0.00549469	0.0816722	0.152469	0.000402569	0.923709	0.958827
ENSMUSG00000002741	Ykt6	YKT6	10652	0	0	0	-9.78e-05	0.93364	0.946296	0.00409146	0.0754354	0.143835	-0.00152318	0.619753	0.75861
ENSMUSG00000002748	Baz1b	BAZ1B	9031	0	0	0	0.00130234	0.638804	0.687826	0.00167475	0.727167	0.807885	0.00716417	0.334368	0.507788
ENSMUSG00000002763	Pex6	PEX6	5190	0	0	0	-0.000240295	0.911909	0.928027	-0.00929339	0.0375802	0.0833172	0.00622012	0.290742	0.460104
ENSMUSG00000002767	Mrpl2	MRPL2	51069	0	0	0	0.00047217	0.648401	0.696629	0.00264283	0.16729	0.268453	-0.0050985	0.0894544	0.20334
ENSMUSG00000002768	Mea1	MEA1	4201	0	0	0	0.0112132	0.000157255	0.00122715	-0.0113536	0.0010014	0.00725983	-0.00232288	0.391576	0.563404
ENSMUSG00000002778	Kdelr1	KDELR1	10945	0	0	0	-0.00311321	0.0123839	0.0216823	0.00943628	0.00157028	0.00917143	-0.00168766	0.50818	0.66769
ENSMUSG00000002781	Tmem143	TMEM143	55260	0	0	0	-0.000901334	0.607359	0.658534	-0.00549657	0.100519	0.179734	-0.0011769	0.795076	0.877791
ENSMUSG00000002797	Ggct	GGCT	79017	0	0	0	0.00160501	0.366855	0.42435	-0.00401085	0.20449	0.313967	-0.00908998	0.0737456	0.177498
ENSMUSG00000002799	Jag2	JAG2	3714	0	0	0	-0.00974045	0.00858837	0.0160384	0.00697052	0.174537	0.277474	-0.00717937	0.335266	0.508611
ENSMUSG00000002803	Btbd6	BTBD6	90135	0	0	0	-0.00751956	0.00386119	0.00853565	-0.00246456	0.420266	0.541789	-0.00201317	0.657331	0.784381
ENSMUSG00000002804	Nudt14	NUDT14	256281	0	0	0	-0.00650336	0.00337273	0.00772762	-0.00378399	0.16055	0.260118	-0.005523	0.172933	0.322575
ENSMUSG00000002808	Epdr1	EPDR1	54749	0	0	0	0.00633494	0.219948	0.271114	-0.0202722	0.0410026	0.0892383	-0.0327227	0.0307193	0.0962028
ENSMUSG00000002812	Flii	FLII	2314	0	0	0	-0.0085323	5e-05	0.000731051	0.00900373	0.000324213	0.00454645	-0.0158716	0.000185927	0.01114
ENSMUSG00000002814	Top3a	TOP3A	7156	0	1	0	-0.0107756	0.000690822	0.00270004	-0.0104014	0.00513295	0.0189423	0.0104694	0.0259249	0.0854729
ENSMUSG00000002820	Atg4d	ATG4D	84971	0	0	0	0.0004342	0.713962	0.756201	0.00571524	0.0233163	0.0576482	-0.00317096	0.319572	0.491582
ENSMUSG00000002825	Qtrt1	QTRT1	81890	0	0	0	0.0179714	2.42e-05	0.000569646	0.000358059	0.84117	0.892907	0.00354151	0.212316	0.373275
ENSMUSG00000002831	Plin4	PLIN4	729359	0	0	0	0.0166853	0.00125708	0.00388835	0.0476107	0.000220717	0.003845	-0.0111314	0.154985	0.298641
ENSMUSG00000002833	Hdgfl2	HDGFL2	84717	0	0	0	0.00505916	0.000552797	0.00237476	0.00537731	0.00281075	0.0129085	0.00505833	0.017581	0.065471
ENSMUSG00000002835	Chaf1a	CHAF1A	10036	0	0	0	0.00338763	0.474127	0.530518	0.00667723	0.414815	0.53688	0.0166988	0.196275	0.353159
ENSMUSG00000002844	Adprh	ADPRH	141	0	0	0	0.00262375	0.000867657	0.00307402	-0.00403973	0.00128129	0.00819799	-0.0071686	0.000740647	0.0140929
ENSMUSG00000002845	Tmem39a	TMEM39A	55254	0	0	0	0.00987028	0.000254283	0.00156882	0.00859124	0.00256949	0.0122072	0.0144935	0.00173392	0.0186429
ENSMUSG00000002846	Timmdc1	TIMMDC1	51300	0	0	0	0.000657532	0.456588	0.513606	-0.00949289	0.00106661	0.00747921	-0.0106608	0.00286154	0.0229244
ENSMUSG00000002847	Pla1a	PLA1A	51365	0	0	0	0.0075669	0.00571276	0.0115921	0.00366263	0.292587	0.412285	-0.0114979	0.0500126	0.135743
ENSMUSG00000002870	Mcm2	MCM2	4171	1	1	0	-0.0114519	5.59e-06	0.000300233	-0.00679329	0.000472465	0.00522307	-0.000875682	0.497726	0.659255
ENSMUSG00000002871	Tpra1	TPRA1	131601	0	0	0	-0.0031842	0.0847769	0.116512	0.00366207	0.22138	0.333894	-0.0122797	0.0203259	0.0722707
ENSMUSG00000002881	Nab1	NAB1	4664	0	0	0	-0.00239703	0.152546	0.196259	0.00904825	0.0102985	0.0309469	-0.00353303	0.389116	0.560782
ENSMUSG00000002885	Adgre5	ADGRE5	976	0	0	0	-0.0151756	4.81e-06	0.000286596	0.018096	2.85e-05	0.00232828	-0.0194437	0.000117832	0.0101511
ENSMUSG00000002897	Il17ra	IL17RA	23765	0	0	0	0.0126778	0.000343269	0.00181805	0.00584556	0.0441747	0.0943889	-0.0192492	0.00208112	0.0201369
ENSMUSG00000002900	Lamb1	LAMB1	3912	0	0	0	0.00309195	0.00655883	0.0128679	-0.0156101	0.000150612	0.00327567	-0.0196097	0.000303059	0.0120417
ENSMUSG00000002908	Kcnn1	KCNN1	3780	0	0	0	-0.00200083	0.418354	0.476074	-0.00826781	0.0796124	0.149896	-0.00345901	0.584651	0.731475
ENSMUSG00000002910	Arrdc2	ARRDC2	27106	0	0	0	0.000306414	0.886949	0.90644	-0.0101443	0.0259554	0.0625568	-0.00299881	0.59505	0.740012
ENSMUSG00000002948	Map2k7	MAP2K7	5609	0	0	0	0.0152092	0.0014979	0.00438485	0.00353883	0.449674	0.568805	0.00283625	0.683488	0.8027
ENSMUSG00000002949	Timm44	TIMM44	10469	0	0	0	0.00606858	0.000150874	0.00120953	0.00166509	0.109756	0.193052	0.000777829	0.586078	0.7326
ENSMUSG00000002957	Ap2a2	AP2A2	161	0	0	0	0.00640001	0.00017535	0.00130684	-0.00547682	0.00190796	0.0101853	-0.00958794	0.00114904	0.0159539
ENSMUSG00000002963	Pnkp	PNKP	11284	0	0	0	0.00726215	0.00115874	0.0036812	-0.00729051	0.00841119	0.0266276	0.00107685	0.726127	0.829871
ENSMUSG00000002968	Med25	MED25	81857	0	0	0	0.00547643	0.0214216	0.0346673	0.00611887	0.101012	0.18039	0.00334032	0.513672	0.671974
ENSMUSG00000002980	Bcam	BCAM	4059	0	0	0	-0.00136738	0.442473	0.499594	0.00611309	0.0741584	0.141884	0.00056622	0.90058	0.945354
ENSMUSG00000002981	Clptm1	CLPTM1	1209	0	0	0	0.0176476	0.0120171	0.0211404	0.00504031	0.595706	0.699663	-0.00807485	0.572252	0.722244
ENSMUSG00000002983	Relb	RELB	5971	0	0	0	0.0183972	0.000388462	0.00195606	0.00794702	0.0622983	0.123431	0.00790106	0.18633	0.340594
ENSMUSG00000002984	Tomm40	TOMM40	10452	0	0	0	0.0179356	0.00442596	0.00942887	-0.0136335	0.0994325	0.17807	-0.00702077	0.534884	0.691265
ENSMUSG00000002996	Hbp1	HBP1	26959	0	0	0	0.00298663	0.0258623	0.0408202	0.0018553	0.345815	0.46957	0.0271024	0.000275437	0.0119222
ENSMUSG00000002997	Prkar2b	PRKAR2B	5577	0	1	0	-0.0170406	0.000156993	0.00122678	0.0024935	0.361997	0.486462	-0.0104697	0.0301627	0.0949579
ENSMUSG00000003031	Cdkn1b	CDKN1B	1027	0	1	0	-0.00596278	0.00641556	0.0126505	0.00412873	0.159816	0.259076	0.0173297	0.0042951	0.02808
ENSMUSG00000003032	Klf4	KLF4	9314	1	0	0	0.0327278	1.28e-05	0.000426915	0.00787379	0.0231277	0.0573182	-0.00323844	0.451574	0.619627
ENSMUSG00000003033	Ap1m1	AP1M1	8907	0	0	0	0.00177416	0.031742	0.0489854	0.00476528	0.00548287	0.0198337	0.0010689	0.556967	0.708833
ENSMUSG00000003037	Rab8a	RAB8A	4218	0	1	0	-8.73e-05	0.91263	0.928373	8.01e-05	0.953965	0.971026	0.0104546	0.00227526	0.0209525
ENSMUSG00000003038	Hmgn2	HMGN2	3151	0	0	0	-0.0109737	0.000128934	0.00112424	-0.00278875	0.120565	0.208443	0.0043628	0.109236	0.234591
ENSMUSG00000003039	Fam32a	FAM32A	26017	0	0	0	-0.00226311	0.093727	0.127435	-0.00535177	0.0328425	0.0749487	0.00967329	0.0152422	0.0594717
ENSMUSG00000003062	Stard3nl	STARD3NL	83930	0	0	0	0.00900099	0.000642133	0.00258571	-0.0114017	0.00177491	0.00974844	-0.012435	0.00562552	0.0323722
ENSMUSG00000003068	Stk11	STK11	6794	0	0	0	-0.000377935	0.81032	0.840974	-0.00823407	0.0168498	0.0447555	-0.00152236	0.710508	0.820184
ENSMUSG00000003072	Atp5d	ATP5F1D	513	0	0	0	0.000797138	0.100103	0.135029	0.00213305	0.0220326	0.0552869	0.000822807	0.47384	0.638333
ENSMUSG00000003099	Ppp5c	PPP5C	5536	0	0	0	-0.00451259	0.00159484	0.0045681	0.00369093	0.029084	0.0681107	-0.00078064	0.710444	0.820184
ENSMUSG00000003119	Cdk12	CDK12	51755	0	0	0	0.00135091	0.427417	0.484748	-0.00577793	0.0763733	0.145112	0.00348954	0.429552	0.599257
ENSMUSG00000003123	Lipe	LIPE	3991	0	0	0	-0.00314231	0.110763	0.14765	0.00164129	0.596059	0.699691	-0.000522749	0.909837	0.950639
ENSMUSG00000003131	Pafah1b2	PAFAH1B2	5049	1	0	0	0.00314512	0.0013	0.00397435	-0.00799952	0.000347203	0.00470296	0.00445856	0.0123802	0.0514001
ENSMUSG00000003134	Tbc1d8	TBC1D8	11138	0	0	0	-0.0043048	0.00629904	0.0124889	0.0061851	0.014083	0.0391044	-8.89e-05	0.975926	0.987594
ENSMUSG00000003135	Cnot11	CNOT11	55571	0	0	0	0.00090232	0.46311	0.519766	-0.00262441	0.231973	0.345588	0.00506546	0.139084	0.276469
ENSMUSG00000003154	Foxj2	FOXJ2	55810	0	0	0	-0.00329861	0.211224	0.261714	0.00478229	0.28137	0.400158	-0.00416747	0.521661	0.67955
ENSMUSG00000003161	Sri	SRI	6717	0	0	0	-0.00507039	0.000483741	0.00220032	-0.00518845	0.00280708	0.012904	-0.00196175	0.254653	0.421719
ENSMUSG00000003166	Dgcr2	DGCR2	9993	0	0	0	-0.0020364	0.00116364	0.00368845	0.00399911	0.000765647	0.00641362	0.000566823	0.515738	0.673941
ENSMUSG00000003184	Irf3	IRF3	3661	0	0	0	-0.00166084	0.0146356	0.0249339	-0.00350648	0.00674939	0.0228791	0.0128559	0.000300612	0.0120245
ENSMUSG00000003190	Bcl2l12	BCL2L12	83596	0	0	0	0.000341632	0.801684	0.833675	0.00548291	0.0465684	0.0983463	0.00544541	0.155068	0.298699
ENSMUSG00000003198	Zfp959	NA	NA	0	0	0	-0.00521767	0.00381617	0.00846694	-0.00598663	0.0206969	0.0526045	0.00805611	0.0315157	0.0978096
ENSMUSG00000003199	Mpnd	MPND	84954	0	0	0	-0.00377504	0.00993934	0.0180629	-0.00232308	0.24907	0.364416	-0.00185504	0.526529	0.684323
ENSMUSG00000003200	Sh3gl1	SH3GL1	6455	0	0	0	0.00100412	0.139782	0.181307	0.00410077	0.00643199	0.0220702	-0.00332476	0.0702734	0.171176
ENSMUSG00000003208	Ccdc94	YJU2	55702	0	0	0	0.00451077	0.00142299	0.00422173	0.010819	0.000470979	0.00522093	0.0149514	0.000643007	0.0138891
ENSMUSG00000003226	Ranbp2	RANBP2	5903	0	1	0	0.00321184	0.014276	0.0243975	0.00318054	0.107667	0.190254	0.0161356	0.0012757	0.0166579
ENSMUSG00000003228	Grk5	GRK5	2869	0	0	0	0.00274925	0.180272	0.227228	0.000491347	0.882152	0.921964	-0.00590103	0.256414	0.423409
ENSMUSG00000003233	Dvl3	DVL3	1857	0	0	0	0.00300732	0.0396352	0.0594892	0.00473204	0.0570551	0.114995	0.00215834	0.510113	0.669001
ENSMUSG00000003234	Abcf3	ABCF3	55324	0	0	0	0.0054612	0.000490997	0.00221744	0.00207604	0.110643	0.194493	0.00982313	0.00166949	0.0185922
ENSMUSG00000003235	Eif2b5	EIF2B5	8893	0	0	0	0.00582284	0.00112823	0.00362862	-0.00447412	0.0246538	0.0602004	0.000272264	0.911032	0.951198
ENSMUSG00000003269	Cyth2	CYTH2	9266	0	0	0	0.0137684	0.0154232	0.0260853	0.00858444	0.288958	0.408522	-0.0226763	0.085535	0.196846
ENSMUSG00000003282	Plag1	PLAG1	5324	0	0	0	-0.00254725	0.00344764	0.00786618	0.00300141	0.0164823	0.0440666	-0.00405077	0.0250865	0.0835242
ENSMUSG00000003299	Mrpl4	MRPL4	51073	0	0	0	0.00327905	0.00889213	0.0164685	0.00157239	0.34654	0.470442	-0.000333834	0.891487	0.940138
ENSMUSG00000003308	Keap1	KEAP1	9817	0	0	0	-0.00302074	0.164166	0.209108	-0.00238871	0.495403	0.611438	-0.00871385	0.127015	0.260257
ENSMUSG00000003316	Glg1	GLG1	2734	0	0	0	-0.00134154	0.0363147	0.0550908	0.00449309	0.0027493	0.0127906	-0.0045136	0.0130516	0.053306
ENSMUSG00000003344	Btbd2	BTBD2	55643	0	0	0	-0.00233339	0.30523	0.360614	0.0041081	0.293421	0.413188	-0.000307888	0.956666	0.977622
ENSMUSG00000003345	Csnk1g2	CSNK1G2	1455	0	0	0	-0.00597908	0.00673488	0.0131569	0.00442396	0.14119	0.235694	-0.00364071	0.393489	0.56566
ENSMUSG00000003346	Abhd17a	ABHD17A	81926	0	0	0	-0.0024457	0.177337	0.223897	0.0087439	0.0172155	0.0454314	-0.00435499	0.334915	0.508207
ENSMUSG00000003348	Mob3a	MOB3A	126308	0	0	0	0.00589209	0.00108724	0.00354214	-0.00145	0.381491	0.505527	0.00961386	0.00560289	0.0322907
ENSMUSG00000003352	Cacnb3	CACNB3	784	0	0	0	-0.0216077	9.48e-05	0.000983511	0.0239231	0.000466084	0.0052179	-0.00544636	0.246598	0.41274
ENSMUSG00000003355	Fkbp11	FKBP11	51303	0	0	0	-0.00695983	0.000694668	0.00270582	-0.0101205	0.00121766	0.00797882	0.0126464	0.00226984	0.0209525
ENSMUSG00000003360	Ddx23	DDX23	9416	0	0	0	-0.00295263	0.00132928	0.00403048	-0.000765668	0.385447	0.509182	0.00999976	0.000558129	0.0136951
ENSMUSG00000003363	Pld3	PLD3	23646	0	0	0	-3.4e-05	0.973829	0.978362	0.00415501	0.0474269	0.099736	0.00418956	0.151554	0.29456
ENSMUSG00000003380	Rabac1	RABAC1	10567	0	0	0	0.00304559	0.00997867	0.01812	0.00685341	0.00371189	0.015271	0.00297319	0.229383	0.393425
ENSMUSG00000003382	Etv3	ETV3	2117	0	0	0	0.00814379	0.00799799	0.0151074	0.00644194	0.133389	0.225802	0.00724584	0.245338	0.411474
ENSMUSG00000003402	Prkcsh	PRKCSH	5589	0	0	0	0.00568158	7.52e-06	0.000324637	0.00292245	0.00098785	0.00722109	0.0143447	1.03e-05	0.0067496
ENSMUSG00000003411	Rab3b	RAB3B	5865	0	0	0	0.000218286	0.853488	0.878839	0.0107051	0.00200315	0.0104687	-0.00239168	0.444841	0.613426
ENSMUSG00000003420	Fcgrt	FCGRT	2217	0	0	0	0.000211124	0.765097	0.801311	0.00557313	0.00325997	0.0140732	0.00536763	0.0189689	0.0689339
ENSMUSG00000003421	Nosip	NOSIP	51070	1	0	0	0.00147005	0.184312	0.231655	-0.00285798	0.139352	0.23358	0.0263739	0.000231731	0.0116087
ENSMUSG00000003423	Pih1d1	PIH1D1	55011	0	0	0	0.00133096	0.137438	0.17871	-0.0042052	0.0181293	0.0473298	0.00146504	0.496805	0.658416
ENSMUSG00000003429	Rps11	RPS11	6205	0	0	0	0.005925	8.61e-05	0.00093275	0.000871607	0.291312	0.411049	0.00857341	0.000714073	0.0140407
ENSMUSG00000003435	Supt5	SUPT5H	6829	0	0	0	0.00818567	0.000231381	0.00148624	0.0168274	0.000113724	0.00307044	0.0270293	9.13e-05	0.00973459
ENSMUSG00000003437	Paf1	PAF1	54623	0	0	0	0.00273753	0.0408419	0.0610839	0.00403362	0.0723366	0.138987	0.00895267	0.0166816	0.0632123
ENSMUSG00000003438	Timm50	TIMM50	92609	0	0	0	0.002478	0.0134414	0.0231826	0.00282805	0.068377	0.133	0.0118778	0.00142395	0.0174156
ENSMUSG00000003444	Med29	MED29	55588	0	0	0	0.00527175	0.00748033	0.0143126	0.00801822	0.0133015	0.0374616	0.0153149	0.00498794	0.0303075
ENSMUSG00000003452	Bicd1	BICD1	636	0	0	0	-0.0117289	0.00160437	0.00458821	0.00430696	0.256429	0.372655	-0.00143418	0.792974	0.876655
ENSMUSG00000003458	Ncstn	NCSTN	23385	0	0	0	-4.78e-05	0.969514	0.974797	0.00301868	0.190022	0.296346	-0.00957714	0.0184065	0.0676204
ENSMUSG00000003464	Pex19	PEX19	5824	0	0	0	-0.00416668	0.00168042	0.0047264	0.00425361	0.0124773	0.0357297	0.00145022	0.468652	0.634038
ENSMUSG00000003500	Impdh1	IMPDH1	3614	0	0	0	-0.000177174	0.849302	0.875159	-0.00596978	0.00725673	0.023983	0.0118388	0.00256093	0.0220239
ENSMUSG00000003518	Dusp3	DUSP3	1845	0	0	0	0.0236383	1.31e-06	0.000197189	0.0129098	0.00031014	0.00446852	0.00305057	0.185637	0.339845
ENSMUSG00000003526	Prodh	PRODH	5625	0	0	0	-0.00846374	0.00130227	0.00397917	-0.0240061	0.000232605	0.00390749	-0.0128512	0.0093465	0.0431008
ENSMUSG00000003527	Dgcr14	ESS2	8220	0	0	0	0.00509775	0.000282517	0.00164562	0.0119283	8.55e-05	0.00285166	0.0169131	0.000110839	0.00985268
ENSMUSG00000003528	Slc25a1	SLC25A1	6576	0	0	0	-0.0102295	0.000486976	0.00220625	0.0128731	0.00139143	0.00857527	-0.0188739	0.00151906	0.0177559
ENSMUSG00000003531	Dgcr6	DGCR6	8214	0	0	0	0.000622492	0.597221	0.649882	0.00339677	0.124969	0.214135	-0.00632744	0.0677681	0.166868
ENSMUSG00000003534	Ddr1	DDR1	780	0	0	0	-0.0128762	0.00139353	0.00416784	0.0134127	0.0090715	0.0281241	-0.0114171	0.0786649	0.185675
ENSMUSG00000003541	Ier3	IER3	8870	0	0	0	0.0205581	2.11e-05	0.000533536	0.0198861	0.000203147	0.00377273	-0.0197683	0.000883916	0.0147635
ENSMUSG00000003546	Klc4	KLC4	89953	0	0	0	-0.00210954	0.13798	0.179292	0.0119654	0.00189292	0.0101334	0.00967595	0.0205957	0.0728781
ENSMUSG00000003549	Ercc1	ERCC1	2067	0	0	0	0.00134009	0.221392	0.2726	-0.0124519	0.000760664	0.00640088	-0.00961603	0.00812046	0.0396918
ENSMUSG00000003559	As3mt	AS3MT	57412	0	0	0	-0.00266533	0.243067	0.294874	0.0032614	0.391695	0.515115	-0.00187538	0.738645	0.838386
ENSMUSG00000003573	Homer3	HOMER3	9454	0	0	0	-0.0037258	0.232652	0.284322	-0.00075864	0.88231	0.922045	-0.00507533	0.512422	0.670952
ENSMUSG00000003575	Crtc1	CRTC1	23373	0	0	0	0.00595734	0.00553112	0.0112899	0.00465301	0.108434	0.191285	0.000151474	0.969318	0.984639
ENSMUSG00000003581	Rnf215	RNF215	200312	0	0	0	0.00503241	0.0494404	0.0723179	-0.000620757	0.871816	0.914084	-0.00285905	0.620727	0.759254
ENSMUSG00000003604	Aven	AVEN	57099	0	0	0	0.00231766	0.0551719	0.0796827	0.00306583	0.123243	0.211775	-0.00147786	0.590904	0.736908
ENSMUSG00000003617	Cp	CP	1356	1	0	0	-0.000906297	0.376438	0.433856	-0.000589209	0.733445	0.812714	-0.00105221	0.685095	0.80401
ENSMUSG00000003623	Crot	CROT	54677	0	0	0	-0.00891631	0.000635839	0.00257487	-0.00781504	0.0067792	0.0229314	0.00821182	0.0290241	0.0925149
ENSMUSG00000003660	Snrnp200	SNRNP200	23020	0	0	0	0.00283163	0.0044625	0.0094908	-0.000197428	0.867746	0.911013	0.000805558	0.650568	0.780218
ENSMUSG00000003662	Ciao1	CIAO1	9391	0	0	0	0.00368478	0.00330691	0.00761187	-0.000540089	0.703508	0.788754	0.014379	0.000855332	0.0146418
ENSMUSG00000003665	Has1	HAS1	3036	0	0	0	0.033096	3.98e-05	0.000678932	0.0348287	0.000258566	0.00407437	0.0272789	0.00246853	0.0215408
ENSMUSG00000003680	Taf6l	TAF6L	10629	0	0	0	-0.00469607	0.00842028	0.0157785	0.00772962	0.0108208	0.0321354	0.00188279	0.588912	0.735096
ENSMUSG00000003721	Insig2	INSIG2	51141	0	0	0	-0.00349138	0.0173136	0.0287806	0.0125432	0.00116862	0.00779767	-0.00976064	0.0132085	0.0537549
ENSMUSG00000003731	Kpna6	KPNA6	23633	0	0	0	0.004957	0.00079021	0.0029146	0.00384012	0.0150621	0.0411787	-0.000315345	0.865204	0.923143
ENSMUSG00000003752	Itpkc	ITPKC	80271	0	0	0	0.00660484	0.00576801	0.0116893	0.00954344	0.0124981	0.0357445	0.00127574	0.772961	0.862196
ENSMUSG00000003762	Coq8b	COQ8B	79934	0	0	0	-0.00229061	0.297586	0.352603	0.00485	0.208379	0.318569	0.00618375	0.279743	0.449159
ENSMUSG00000003778	Brd8	BRD8	10902	0	0	0	0.000323787	0.632076	0.681458	0.00459828	0.00559607	0.0201128	0.00786827	0.00341101	0.0249501
ENSMUSG00000003779	Kif20a	KIF20A	10112	0	1	0	-0.00913887	6.64e-06	0.000305067	-0.0101512	5.35e-05	0.00267262	0.0164622	3.92e-05	0.00794883
ENSMUSG00000003808	Farsa	FARSA	2193	0	0	0	0.00284393	0.0024896	0.00620096	-0.00216265	0.0612944	0.121992	-0.00100351	0.511911	0.670436
ENSMUSG00000003809	Gcdh	GCDH	2639	0	0	0	-0.0147221	0.000479545	0.00219177	0.00669406	0.0641376	0.12631	-5.54e-05	0.990714	0.995674
ENSMUSG00000003810	Mast2	MAST2	23139	0	0	0	0.000649177	0.46972	0.526204	0.0109918	0.000684353	0.00607841	-0.00587558	0.032344	0.0995735
ENSMUSG00000003812	Dnase2a	DNASE2	1777	0	0	0	-0.00764971	0.00373785	0.00833541	0.00756833	0.0363219	0.0810616	0.00159841	0.726282	0.829871
ENSMUSG00000003813	Rad23a	RAD23A	5886	0	0	0	0.00399462	0.00171539	0.00479336	-0.00661072	0.00200927	0.0104809	-0.00649053	0.00993899	0.0447998
ENSMUSG00000003814	Calr	CALR	811	0	0	0	0.00115764	0.013056	0.0226236	0.0109524	2.26e-05	0.00215564	0.0208668	8.83e-06	0.0067496
ENSMUSG00000003847	Nfat5	NFAT5	10725	0	0	0	-0.00658862	0.00963907	0.0176067	0.0138669	0.00461757	0.0176672	0.000274859	0.956219	0.977495
ENSMUSG00000003848	Nob1	NOB1	28987	0	0	0	0.0192447	4.69e-05	0.000710644	-0.00124315	0.581881	0.686826	0.00348098	0.318868	0.490831
ENSMUSG00000003849	Nqo1	NQO1	1728	0	0	0	-0.0128175	2.12e-05	0.000533536	-0.00617346	0.00227832	0.0113273	-0.00970053	0.00196189	0.0197313
ENSMUSG00000003865	Gys1	GYS1	2997	0	0	0	0.0198782	5.01e-05	0.000731051	-0.0276152	0.000116434	0.00307044	6.57e-06	0.99853	0.999491
ENSMUSG00000003868	Ruvbl2	RUVBL2	10856	1	1	0	0.0117669	2.19e-05	0.000539948	-0.0152567	6.96e-05	0.00271749	0.00447439	0.0292957	0.0930694
ENSMUSG00000003873	Bax	BAX	581	0	0	0	0.00692095	0.000593182	0.00247033	0.00339413	0.0615899	0.122343	-0.00717652	0.0165479	0.0629348
ENSMUSG00000003923	Tfam	TFAM	7019	0	0	0	0.00528276	0.00230297	0.00584298	-0.00294248	0.138126	0.232103	0.00892167	0.0122047	0.0509383
ENSMUSG00000003929	Zfp81	NA	NA	0	0	0	0.00794317	0.00384502	0.00850812	0.0127919	0.00518811	0.0190904	0.00613838	0.224346	0.387926
ENSMUSG00000003948	Mmd	MMD	23531	0	0	0	-0.00238531	0.00154091	0.00447714	0.00320201	0.00378252	0.0154598	-0.0220014	1.36e-05	0.0067496
ENSMUSG00000003955	Fam162a	FAM162A	26355	0	0	0	0.00178253	0.0281546	0.0440193	-0.0040851	0.00920122	0.0284261	-0.00446728	0.0332854	0.101779
ENSMUSG00000003970	Rpl8	RPL8	6132	0	0	0	0.00427439	0.000483741	0.00220032	-0.00233891	0.0337301	0.0766075	-0.005657	0.00484143	0.0298255
ENSMUSG00000003992	Ssbp2	SSBP2	23635	0	0	0	0.0134597	0.000191783	0.00136528	0.0157152	0.000724301	0.00623604	0.00992358	0.017615	0.065555
ENSMUSG00000004018	Fancl	FANCL	55120	0	0	0	0.00286872	0.0183217	0.0302191	-0.00523752	0.0154006	0.0418586	0.00220776	0.397703	0.569783
ENSMUSG00000004032	Gstm5	GSTM5	2949	0	0	0	-0.00661879	0.000510927	0.00226941	0.00485176	0.0108689	0.0322102	-0.00672362	0.0149962	0.0587545
ENSMUSG00000004040	Stat3	STAT3	6774	0	0	0	-0.00336372	0.0219548	0.0353751	0.00930495	0.00348706	0.014704	-0.00619785	0.078618	0.185675
ENSMUSG00000004043	Stat5a	STAT5A	6776	0	0	0	-0.0185072	0.000770892	0.00287545	0.00721156	0.146111	0.242002	-0.00597296	0.39707	0.56909
ENSMUSG00000004044	Cavin1	CAVIN1	284119	0	0	0	-0.00657826	1.62e-05	0.00048184	0.0128682	8.04e-06	0.00193765	0.0138377	4.03e-05	0.00794883
ENSMUSG00000004054	Map3k11	MAP3K11	4296	0	0	0	0.00219864	0.506402	0.562341	-0.000324811	0.954467	0.971363	0.00957163	0.280308	0.449572
ENSMUSG00000004056	Akt2	AKT2	208	0	1	0	0.00416446	0.000965385	0.00327618	0.00246144	0.0547353	0.11128	0.00576065	0.0093993	0.0432882
ENSMUSG00000004069	Dnaja3	DNAJA3	9093	1	0	0	0.0131254	1.66e-05	0.000484449	-0.0154887	8.06e-05	0.00278569	-0.0159832	0.000338724	0.0123215
ENSMUSG00000004070	Hmox2	HMOX2	3163	0	0	0	-0.00821415	0.000452535	0.00211825	0.00546395	0.0141441	0.0391787	0.0122008	0.00296434	0.0233072
ENSMUSG00000004071	Cdip1	CDIP1	29965	0	0	0	0.00129344	0.461221	0.518104	0.00698571	0.0457502	0.0970304	-0.000610153	0.891672	0.940159
ENSMUSG00000004085	Map3k20	MAP3K20	51776	0	0	0	-0.000445492	0.64051	0.689511	-0.000138778	0.933089	0.956119	-0.0112861	0.00322177	0.02428
ENSMUSG00000004096	Cwc15	CWC15	51503	0	0	0	-0.00105623	0.171273	0.217177	-0.00570864	0.00311355	0.0136891	-0.000368421	0.842645	0.908585
ENSMUSG00000004098	Col5a3	COL5A3	50509	0	0	0	0.014987	0.00267465	0.00651704	-0.010689	0.0798987	0.150322	-0.0152241	0.0936696	0.21007
ENSMUSG00000004099	Dnmt1	DNMT1	1786	0	0	0	-0.00614822	0.000204633	0.00140084	0.00560367	0.001775	0.00974844	0.00123881	0.433896	0.603058
ENSMUSG00000004100	Ppan	PPAN	56342	0	0	0	0.0128405	5.44e-05	0.000775473	0.00495275	0.0130584	0.0369681	-0.00813575	0.00890315	0.0418496
ENSMUSG00000004105	Angptl2	ANGPTL2	23452	0	0	0	0.00356279	0.00115621	0.00367417	-0.000789031	0.437419	0.557432	0.00262467	0.113963	0.241881
ENSMUSG00000004127	Trmt10a	TRMT10A	93587	0	0	0	0.00457283	0.017042	0.0283743	0.0135034	0.00222107	0.0111701	0.00988117	0.0368656	0.109288
ENSMUSG00000004151	Etv1	ETV1	2115	0	0	0	-0.0235777	0.000311189	0.00172984	0.0106019	0.0434697	0.0932061	0.00668959	0.334538	0.507979
ENSMUSG00000004207	Psap	PSAP	5660	0	0	0	-0.000246938	0.736203	0.775613	0.00531142	0.0044535	0.0172406	-0.00430712	0.0510121	0.137409
ENSMUSG00000004221	Ikbkg	IKBKG	8517	0	0	0	0.00665152	0.000964248	0.00327329	0.00067783	0.702593	0.788141	0.00185196	0.491434	0.653974
ENSMUSG00000004233	Wars2	WARS2	10352	1	0	0	0.00491689	0.0100411	0.0182189	-0.00126152	0.618299	0.717708	-0.00329171	0.395518	0.567916
ENSMUSG00000004263	Atn1	ATN1	1822	0	0	0	0.00597591	0.0293426	0.0456582	0.00958182	0.0407754	0.0889024	0.00069862	0.906472	0.94867
ENSMUSG00000004264	Phb2	PHB2	11331	0	0	0	0.00489112	4.97e-05	0.000729869	-0.00658623	0.000130944	0.00312083	-0.00201406	0.0468799	0.129825
ENSMUSG00000004266	Ptpn6	PTPN6	5777	0	0	0	-0.014193	0.000322203	0.00176364	0.00574526	0.0643899	0.126698	-0.00618268	0.160543	0.305848
ENSMUSG00000004267	Eno2	ENO2	2026	0	0	0	0.00996859	0.00698129	0.0135573	0.0301595	0.000991171	0.00723342	-0.0142404	0.0729983	0.176219
ENSMUSG00000004268	Emg1	EMG1	10436	0	0	0	0.000348258	0.620293	0.670777	-0.00581016	0.00270961	0.0126574	-0.00317955	0.113005	0.240248
ENSMUSG00000004270	Lpcat3	LPCAT3	10162	0	0	0	-0.00764982	0.00158164	0.00454393	0.00262211	0.284269	0.403229	0.000944162	0.790204	0.874692
ENSMUSG00000004285	Atp6v1f	ATP6V1F	9296	0	0	0	0.00629011	0.000757517	0.00284944	0.00100445	0.520459	0.633477	0.00523859	0.0519649	0.13869
ENSMUSG00000004317	Clcn5	CLCN5	1184	0	0	0	0.00396411	0.0336805	0.0515665	0.0122077	0.00346888	0.0146584	0.00463368	0.278213	0.447737
ENSMUSG00000004319	Clcn3	CLCN3	1182	1	0	0	0.0180839	0.000113899	0.00105323	-0.0132604	0.00227019	0.0113036	-0.00302867	0.450754	0.619118
ENSMUSG00000004356	Utp20	UTP20	27340	0	0	0	0.00811663	0.00233977	0.00591405	-0.00855237	0.0165667	0.0442294	-0.000264584	0.950068	0.97333
ENSMUSG00000004364	Cul3	CUL3	8452	0	0	0	0.00504936	0.00159432	0.00456774	0.00154244	0.336383	0.459269	0.00176563	0.459644	0.626812
ENSMUSG00000004371	Il11	IL11	3589	0	0	0	0.0109418	0.000284353	0.00165379	0.00284615	0.184794	0.289952	0.00736403	0.0392094	0.113991
ENSMUSG00000004383	Large1	LARGE1	9215	0	0	0	0.00660716	0.00192928	0.0051944	0.000510226	0.814694	0.873978	0.00475621	0.174456	0.32478
ENSMUSG00000004393	Ddx56	DDX56	54606	0	0	0	0.0162813	2.81e-05	0.000600867	0.00332226	0.077999	0.147587	0.0175346	0.000766346	0.0142321
ENSMUSG00000004394	Tmed4	TMED4	222068	0	0	0	-2.96e-05	0.975948	0.979974	0.00678258	0.00537771	0.0195989	-0.00477001	0.0942588	0.210939
ENSMUSG00000004446	Bid	BID	637	0	0	0	-0.00256987	0.00542701	0.0111283	-0.0127512	0.000134878	0.00314023	-0.0240245	5.7e-05	0.00817748
ENSMUSG00000004451	Ralb	RALB	5899	0	0	0	-0.00420177	0.00417614	0.00903119	0.00697958	0.00502316	0.0186354	0.00378927	0.172537	0.322151
ENSMUSG00000004455	Ppp1cc	PPP1CC	5501	0	1	0	-0.00236667	0.101618	0.136814	-0.00949225	0.00432657	0.0169275	0.00913028	0.0260089	0.0856729
ENSMUSG00000004460	Dnajb11	DNAJB11	51726	0	0	0	0.0177186	0.0218203	0.035195	0.00766433	0.487884	0.604374	-0.0036527	0.823893	0.895178
ENSMUSG00000004462	Tbccd1	TBCCD1	55171	0	0	0	-0.00759467	0.000387937	0.00195593	-0.00512214	0.0110367	0.0325748	-0.00275501	0.254918	0.421852
ENSMUSG00000004500	Zfp324	ZNF324	25799	0	0	0	-0.0090125	0.00104108	0.00346006	0.00938175	0.00631066	0.021778	0.0305425	0.000431643	0.0130286
ENSMUSG00000004508	Gab2	GAB2	9846	0	0	0	0.0105392	0.00140586	0.00419046	0.00708673	0.0520564	0.107051	-0.0122533	0.030572	0.0958728
ENSMUSG00000004530	Coro1c	CORO1C	23603	0	0	0	-0.00261918	0.008775	0.0162885	0.00344206	0.0286219	0.0672794	-0.00217352	0.285174	0.453993
ENSMUSG00000004535	Tax1bp1	TAX1BP1	8887	0	0	0	0.00427807	0.00100315	0.0033743	0.000253316	0.826392	0.882719	0.00659808	0.00633086	0.0345539
ENSMUSG00000004558	Ndrg2	NDRG2	57447	0	0	0	-0.0165725	0.000508392	0.00226392	0.020805	0.00146058	0.00877375	-0.00413812	0.454196	0.621978
ENSMUSG00000004561	Mettl17	METTL17	64745	0	0	0	-0.00236794	0.0674034	0.0951969	0.00567478	0.0205279	0.0522561	0.0205333	0.000786101	0.0143344
ENSMUSG00000004562	Arhgef40	ARHGEF40	55701	0	0	0	-0.0111841	0.000155332	0.00122552	0.00678712	0.00601888	0.0210956	0.00774992	0.0183365	0.0674498
ENSMUSG00000004565	Pnpla6	PNPLA6	10908	0	0	0	-0.014108	0.000425699	0.00204622	0.00740162	0.0345105	0.0778912	-0.000431891	0.921637	0.957719
ENSMUSG00000004567	Mcoln1	MCOLN1	57192	0	0	0	0.0152792	0.00100848	0.00338328	0.00958946	0.0464101	0.0981131	-0.0111178	0.104775	0.227919
ENSMUSG00000004568	Arhgef18	ARHGEF18	23370	0	0	0	-0.00235163	0.0264175	0.0415989	0.00856166	0.00156539	0.00916479	-0.00371502	0.136056	0.272255
ENSMUSG00000004591	Pkn2	PKN2	5586	0	0	0	-0.00293394	0.144471	0.18692	0.00101115	0.751979	0.8267	-0.0124076	0.0307768	0.0962963
ENSMUSG00000004610	Etfb	ETFB	2109	0	0	0	-0.00139161	0.050341	0.0734706	-0.00484954	0.00325524	0.0140634	-0.00301056	0.0919244	0.207706
ENSMUSG00000004626	Stxbp2	STXBP2	6813	0	0	0	-0.00418021	0.00186862	0.00508996	0.00290316	0.0623711	0.123533	-0.0152063	0.000619668	0.0138187
ENSMUSG00000004631	Sgce	SGCE	8910	0	0	0	-0.00420723	0.0640909	0.0910129	0.0070964	0.0703025	0.135924	-0.00659182	0.228636	0.392732
ENSMUSG00000004633	Chn2	CHN2	1124	0	0	0	-0.00862514	0.0165663	0.0277318	0.00719996	0.176228	0.27958	-0.00495568	0.512827	0.671239
ENSMUSG00000004637	Wwox	WWOX	51741	0	0	0	0.00165365	0.125174	0.164559	-0.00348044	0.0709783	0.137022	-0.00758847	0.0175088	0.0652659
ENSMUSG00000004642	Slbp	SLBP	7884	0	0	0	-0.0107932	0.000123252	0.00109303	0.0010432	0.517479	0.630454	0.0172615	0.000700962	0.0140407
ENSMUSG00000004655	Aqp1	AQP1	358	0	0	0	-0.0151403	0.000161888	0.00125203	0.0275311	0.000126049	0.00307758	-0.00457994	0.228599	0.392732
ENSMUSG00000004661	Arid3b	ARID3B	10620	0	0	0	-0.00578662	0.00472762	0.00995106	0.00347644	0.18295	0.287652	-0.00274715	0.462459	0.6293
ENSMUSG00000004665	Cnn2	CNN2	1265	0	0	0	0.00769091	0.000221416	0.00145658	0.00664141	0.00231617	0.0114706	-0.0179471	0.000318444	0.0121839
ENSMUSG00000004667	Polr2e	POLR2E	5434	0	0	0	4.54e-05	0.915089	0.930295	0.00336891	0.00323033	0.0139928	-0.00117812	0.30575	0.477513
ENSMUSG00000004677	Myo9b	MYO9B	4650	0	0	0	-0.00308621	0.00777596	0.0147597	-0.00116589	0.438441	0.558549	0.00302895	0.202165	0.360975
ENSMUSG00000004748	Mtfp1	MTFP1	51537	0	0	0	-0.00560595	0.00862963	0.0160944	-0.000824562	0.766563	0.837581	-0.00426353	0.321854	0.494362
ENSMUSG00000004768	Rab23	RAB23	51715	0	0	0	0.00110084	0.390086	0.447691	-0.00130861	0.5474	0.657731	0.000890591	0.78353	0.869238
ENSMUSG00000004771	Rab11a	RAB11A	8766	0	0	0	-0.00497705	0.00117928	0.00372989	-0.00516724	0.00748977	0.0244697	-0.000256793	0.903229	0.946586
ENSMUSG00000004788	Eif2b2	EIF2B2	8892	0	0	0	0.00450357	0.00121652	0.00380787	0.0067321	0.002	0.0104646	0.0158991	0.000443969	0.0130286
ENSMUSG00000004789	Dlst	DLST	1743	0	0	0	0.00215566	0.00207946	0.00545517	0.00637349	0.000335839	0.00461224	-0.00118173	0.296459	0.467148
ENSMUSG00000004791	Pgf	PGF	5228	0	0	0	0.0103197	0.000446416	0.00209684	0.0481793	6.99e-06	0.0018174	-0.0431965	7.6e-05	0.00936303
ENSMUSG00000004798	Ulk2	ULK2	9706	0	0	0	-0.01079	0.000276573	0.00162757	0.00167549	0.403686	0.527429	-0.00221168	0.462674	0.629368
ENSMUSG00000004815	Dgkq	DGKQ	1609	0	0	0	-0.000213509	0.955841	0.963675	0.00596302	0.380906	0.505228	-0.00194793	0.845788	0.910392
ENSMUSG00000004843	Chmp2b	CHMP2B	25978	0	0	0	0.00730943	0.000985402	0.00332969	0.00761991	0.00587465	0.0207811	0.00405797	0.195479	0.352222
ENSMUSG00000004846	Plod3	PLOD3	8985	0	0	0	0.00240078	0.0108601	0.0194551	-0.000156182	0.90135	0.935024	-0.00234674	0.237459	0.402568
ENSMUSG00000004849	Ap1s1	AP1S1	1174	0	0	0	-0.00705379	3.81e-05	0.000674487	0.000981607	0.227054	0.340388	-0.000411174	0.723657	0.828922
ENSMUSG00000004865	Srpk1	SRPK1	6732	1	0	0	-0.00133669	0.0105553	0.0190123	-0.0146499	9.18e-06	0.0020196	0.00878332	0.000405682	0.0127678
ENSMUSG00000004880	Lbr	LBR	3930	0	0	1	-0.00897164	5.44e-05	0.000775473	0.00213998	0.0787192	0.148581	0.00256059	0.145913	0.286249
ENSMUSG00000004885	Crabp2	CRABP2	1382	0	0	0	0.00906071	0.0136124	0.0234245	0.0104491	0.066808	0.130446	-0.0143076	0.088702	0.202142
ENSMUSG00000004891	Nes	NES	10763	0	0	0	0.0151093	3.41e-05	0.000653441	-0.00766723	0.00280865	0.012904	0.00747891	0.0151088	0.0589915
ENSMUSG00000004895	Prcc	PRCC	5546	0	0	0	-0.000189622	0.920857	0.934997	0.00205614	0.537219	0.648775	0.0100289	0.0744982	0.178821
ENSMUSG00000004896	Rrnad1	RRNAD1	51093	0	0	0	0.00718944	0.00185454	0.0050659	0.00484749	0.0681595	0.132723	0.00997236	0.0210874	0.0740227
ENSMUSG00000004897	Hdgf	HDGF	3068	0	0	0	0.00701902	0.000338811	0.00180531	0.00218141	0.140376	0.234781	0.00265023	0.222058	0.385485
ENSMUSG00000004929	Thop1	THOP1	7064	0	0	0	0.00284469	0.00535245	0.011009	-0.00140496	0.276513	0.395364	0.00270062	0.178217	0.329584
ENSMUSG00000004931	Apba3	APBA3	9546	0	0	0	0.0162262	3.3e-05	0.000638782	0.00192485	0.280431	0.399221	0.00877509	0.010168	0.0454738
ENSMUSG00000004934	Pias4	PIAS4	51588	0	1	0	0.00812989	0.00077299	0.00287858	0.00795496	0.00561136	0.0201361	0.00752022	0.0363624	0.108203
ENSMUSG00000004936	Map2k1	MAP2K1	5604	0	0	0	-0.000919696	0.271372	0.325249	-0.00538709	0.00582649	0.020649	0.00618779	0.0173006	0.0647853
ENSMUSG00000004937	Sgta	SGTA	6449	0	0	0	0.00358042	0.00364318	0.00817857	0.00752487	0.00187754	0.010103	0.00449221	0.0637444	0.15957
ENSMUSG00000004945	Tmem242	TMEM242	729515	0	0	0	-0.00540926	0.00409519	0.00891174	0.00350422	0.14183	0.23667	-0.00170049	0.608973	0.749828
ENSMUSG00000004947	Dtx2	DTX2	113878	0	0	0	0.00849054	0.000223689	0.00146233	0.0129153	0.000333741	0.00459446	0.000822664	0.709011	0.819137
ENSMUSG00000004951	Hspb1	HSPB1	3315	0	0	0	0.0122085	6.99e-06	0.000313591	0.012172	8.6e-05	0.00286	0.02082	5.23e-05	0.00811477
ENSMUSG00000004952	Rasa4	RASA4	10156	0	0	0	0.003312	0.0125402	0.0218923	0.0158706	0.000328409	0.00457613	-0.0227062	0.000404371	0.0127678
ENSMUSG00000004980	Hnrnpa2b1	HNRNPA2B1	3181	0	0	0	-0.014713	8.74e-08	0.000105368	-0.0135532	5.42e-06	0.0018174	0.0130391	4.25e-05	0.00807156
ENSMUSG00000004994	Ccdc130	CCDC130	81576	0	0	0	0.0142649	0.00021049	0.00141981	0.00137182	0.573127	0.679227	-0.00410651	0.279084	0.448657
ENSMUSG00000004996	Mri1	MRI1	84245	0	0	0	0.00653246	0.00116425	0.00368845	-0.000476281	0.796698	0.860807	-0.00880285	0.0133008	0.0539769
ENSMUSG00000005034	Prkacb	PRKACB	5567	0	0	0	-0.00132184	0.0659406	0.0934192	0.00159506	0.172374	0.274789	-0.00569059	0.00933986	0.0431008
ENSMUSG00000005043	Sgsh	SGSH	6448	0	0	0	-0.0131507	0.00116259	0.00368783	-0.000448476	0.90414	0.936814	-0.0128787	0.0470761	0.130129
ENSMUSG00000005054	Cstb	CSTB	1476	0	0	0	0.0064917	0.000451836	0.00211584	0.00260827	0.0890195	0.163229	0.00184202	0.383159	0.554783
ENSMUSG00000005057	Sh2b2	SH2B2	10603	0	0	0	0.00351861	0.147576	0.190528	0.00198382	0.608956	0.710581	-0.00253085	0.663168	0.788632
ENSMUSG00000005069	Pex5	PEX5	5830	0	0	0	0.00652463	0.0010028	0.00337412	0.00381074	0.0590599	0.118182	0.00100055	0.704566	0.816805
ENSMUSG00000005078	Jkamp	JKAMP	51528	0	0	0	-0.00874936	0.00121189	0.00379732	-0.0053255	0.0627579	0.124148	-0.00814103	0.0588288	0.151033
ENSMUSG00000005087	Cd44	CD44	960	0	0	0	0.000776674	0.240466	0.292217	-0.00403253	0.00704423	0.0235082	-0.0132056	0.000465734	0.0130286
ENSMUSG00000005102	Eif2ak4	EIF2AK4	440275	0	0	0	-0.0081569	0.00106171	0.0035013	0.00158601	0.482167	0.599304	-0.0148219	0.00364003	0.0258331
ENSMUSG00000005103	Wdr1	WDR1	9948	0	0	0	0.00370087	5.73e-05	0.00079746	0.00236448	0.00196591	0.0103832	0.00130791	0.0845683	0.195131
ENSMUSG00000005107	Slc2a9	SLC2A9	56606	0	0	0	-0.00135913	0.607194	0.658534	0.00263183	0.565459	0.672972	-0.00576383	0.409166	0.580607
ENSMUSG00000005124	Wisp1	WISP1	8840	1	0	0	0.0111844	3.96e-05	0.000678932	0.00941171	0.000568269	0.00565304	-0.0110474	0.00132666	0.0170359
ENSMUSG00000005125	Ndrg1	NDRG1	10397	1	0	0	0.0551325	1.49e-06	0.00021044	-0.00186751	0.580869	0.685844	-0.0161442	0.0130515	0.053306
ENSMUSG00000005142	Man2b1	MAN2B1	4125	0	0	0	-0.00288768	0.0253886	0.0401446	0.0126764	0.00081014	0.00657772	-0.00722593	0.030283	0.0952797
ENSMUSG00000005148	Klf5	KLF5	688	0	0	0	0.0109812	0.000122902	0.00109155	0.0024118	0.166321	0.26731	-0.0171488	0.000753497	0.0141775
ENSMUSG00000005150	Wdr83	WDR83	84292	0	0	0	0.00145529	0.180718	0.227639	-0.00648889	0.00712587	0.0237311	0.00193213	0.468605	0.634038
ENSMUSG00000005161	Prdx2	PRDX2	7001	0	0	0	-0.00460327	0.000305157	0.00171295	0.0113902	7.64e-05	0.00274839	0.00168193	0.222474	0.385973
ENSMUSG00000005198	Polr2a	POLR2A	5430	0	0	0	0.00368952	0.00301267	0.00712234	0.0216388	3.77e-05	0.00243542	0.0428019	1.17e-05	0.0067496
ENSMUSG00000005204	Senp3	SENP3	26168	0	0	0	0.00707771	0.011712	0.0206831	0.000222138	0.953221	0.970614	0.00337209	0.554492	0.706784
ENSMUSG00000005225	Plekha8	PLEKHA8	84725	0	0	0	-0.00541157	0.00867579	0.016162	0.00160482	0.551368	0.661734	-0.00311362	0.446443	0.615412
ENSMUSG00000005233	Spc25	SPC25	57405	0	1	0	-0.0211418	2.8e-06	0.000271226	-0.00518052	0.00637649	0.0219522	0.00179568	0.389844	0.561591
ENSMUSG00000005262	Ufd1	UFD1	7353	0	0	0	-0.00243515	0.0368295	0.0557682	-0.00413643	0.0407979	0.0889345	0.0156956	0.00120315	0.016212
ENSMUSG00000005267	Zfp287	ZNF287	57336	0	0	0	-0.00660449	0.00300594	0.00711084	0.0021572	0.39063	0.513892	-0.00120651	0.744885	0.842306
ENSMUSG00000005299	Letm1	LETM1	3954	0	0	0	0.0198992	0.00224624	0.00573789	0.0016481	0.810162	0.871404	0.00266811	0.794886	0.877727
ENSMUSG00000005312	Ubqln1	UBQLN1	29979	0	0	0	0.00812041	0.0197852	0.0323486	-0.00615112	0.231296	0.3449	-0.00272653	0.711208	0.820648
ENSMUSG00000005354	Txn2	TXN2	25828	0	0	0	0.00557813	0.000242483	0.00153087	-0.00713174	0.000666259	0.0060117	-0.00509499	0.00958505	0.0438222
ENSMUSG00000005360	Slc1a3	SLC1A3	6507	0	0	0	-0.018098	4.35e-05	0.000689213	0.0103369	0.00233969	0.0115485	-0.00955295	0.0152752	0.0595394
ENSMUSG00000005362	Crbn	CRBN	51185	0	0	0	-0.000956279	0.189064	0.237107	0.00648251	0.00166556	0.00946077	0.0145217	0.000441696	0.0130286
ENSMUSG00000005370	Msh6	MSH6	2956	0	0	0	-0.0185704	1.28e-05	0.000426915	-0.000908927	0.573263	0.679247	-0.0094171	0.00576775	0.0327864
ENSMUSG00000005371	Fbxo11	FBXO11	80204	1	0	0	0.00148771	0.322356	0.378774	-0.0118925	0.00282177	0.0129487	-0.0072851	0.0848583	0.195643
ENSMUSG00000005374	Tbl2	TBL2	26608	0	0	0	-0.00450052	0.010081	0.018274	-0.00844922	0.0075528	0.0246025	0.0137156	0.00550935	0.031961
ENSMUSG00000005378	Bud23	BUD23	114049	0	0	0	0.00453725	0.00932404	0.017138	0.00286814	0.231299	0.3449	0.00994009	0.0195897	0.0704293
ENSMUSG00000005397	Nid1	NID1	4811	0	0	0	0.0157387	0.000113024	0.00105122	0.00581062	0.0334578	0.0760948	-0.00401579	0.263491	0.430928
ENSMUSG00000005410	Mcm5	MCM5	4174	0	1	0	-0.0164795	2.62e-06	0.000271226	0.00799963	0.000565385	0.00564891	0.00280664	0.108826	0.233841
ENSMUSG00000005413	Hmox1	HMOX1	3162	1	0	0	0.0447204	2.36e-06	0.000269984	0.0239176	0.000393794	0.00481819	0.00574572	0.205263	0.364686
ENSMUSG00000005417	Mprip	MPRIP	23164	0	0	0	0.00189831	0.0364316	0.0552463	0.00192531	0.175832	0.279029	-0.0118501	0.00132596	0.0170359
ENSMUSG00000005442	Cic	CIC	23152	0	0	0	-0.00379606	0.125668	0.165132	0.0175629	0.00340393	0.0144924	-0.000704987	0.904027	0.947076
ENSMUSG00000005447	Pafah1b3	PAFAH1B3	5050	0	0	0	-0.00416515	0.015145	0.0256814	0.00599506	0.0335655	0.0763094	0.00804942	0.0500135	0.135743
ENSMUSG00000005469	Prkaca	PRKACA	5566	0	1	0	-0.00841975	3.97e-05	0.000678932	0.0126716	6.74e-05	0.00271749	-0.00531015	0.00661302	0.035427
ENSMUSG00000005470	Asf1b	ASF1B	55723	0	0	0	-0.0212822	5.59e-06	0.000300233	-0.00826241	0.00199257	0.0104625	0.017461	0.000643094	0.0138891
ENSMUSG00000005481	Ddx39	DDX39A	10212	0	0	0	-8.01e-05	0.726952	0.767401	-0.00649317	3.02e-05	0.00236478	0.00473494	0.000497115	0.0131824
ENSMUSG00000005483	Dnajb1	DNAJB1	3337	0	0	0	-0.00490692	0.00163086	0.00464105	0.017735	0.000121766	0.00307112	0.0164912	0.000706731	0.0140407
ENSMUSG00000005501	Usp40	USP40	55230	0	0	0	-0.00342712	0.051833	0.0753648	-0.00681513	0.0318576	0.0731682	-0.0115164	0.0194963	0.0701819
ENSMUSG00000005505	Kbtbd4	KBTBD4	55709	0	0	0	-0.0140474	0.000381643	0.001931	0.00472753	0.125602	0.215	0.000688278	0.870994	0.926339
ENSMUSG00000005506	Celf1	CELF1	10658	0	0	0	0.00697228	0.0119949	0.0211078	-0.00508872	0.198179	0.306374	0.000928108	0.86827	0.925205
ENSMUSG00000005510	Ndufs3	NDUFS3	4722	0	0	0	0.00410467	0.00151276	0.00441592	0.00551845	0.00368042	0.015189	0.00778247	0.00463121	0.0292187
ENSMUSG00000005514	Por	POR	5447	0	0	0	-0.0104619	8.38e-05	0.000913891	0.00424268	0.0166651	0.0444017	-0.0121139	0.00146451	0.0175864
ENSMUSG00000005533	Igf1r	IGF1R	3480	0	0	0	-0.0026289	0.136994	0.178216	0.00152888	0.586619	0.691064	-0.00350687	0.413583	0.584844
ENSMUSG00000005534	Insr	INSR	3643	1	0	0	0.00116297	0.553804	0.608928	-0.00457224	0.200102	0.308513	0.00415928	0.420608	0.590763
ENSMUSG00000005566	Trim28	TRIM28	10155	0	0	0	0.00124047	0.353817	0.411474	0.00249777	0.282586	0.401389	-0.000871798	0.795717	0.878075
ENSMUSG00000005575	Ube2m	UBE2M	9040	0	0	0	0.0032778	0.0701733	0.0986825	0.000193805	0.944311	0.964546	0.00687793	0.129583	0.263777
ENSMUSG00000005580	Adcy9	ADCY9	115	0	0	0	0.00335687	0.025083	0.0397161	-0.00357448	0.126659	0.216524	-0.00679372	0.0645995	0.161041
ENSMUSG00000005609	Ctr9	CTR9	9646	0	0	0	0.000324876	0.798068	0.830368	0.00245174	0.282033	0.400753	0.00727796	0.0558781	0.145614
ENSMUSG00000005610	Eif4g2	EIF4G2	1982	1	0	0	0.00206824	0.0120321	0.0211504	-0.00527406	0.00278619	0.0128576	-0.00544039	0.0118715	0.0499301
ENSMUSG00000005615	Pcyt1a	PCYT1A	5130	0	0	0	0.00169849	0.01857	0.0305758	0.0174735	2.27e-05	0.00215564	0.0223927	4.76e-05	0.00807156
ENSMUSG00000005621	Zfp592	ZNF592	9640	0	0	0	0.0144346	0.000976573	0.00330954	0.0109717	0.0214705	0.0541736	-0.00520847	0.380131	0.551905
ENSMUSG00000005625	Psmd4	PSMD4	5710	0	1	0	0.00473949	0.0013035	0.00398184	-0.00221374	0.139821	0.234158	0.00781309	0.00671512	0.0356975
ENSMUSG00000005656	Snx6	SNX6	58533	0	0	0	-0.00241102	0.00451731	0.00958776	0.00121756	0.247799	0.36319	-0.00803905	0.00191975	0.0195044
ENSMUSG00000005667	Mthfd2	MTHFD2	10797	1	0	0	0.0265299	1.47e-05	0.000458215	-0.001959	0.410882	0.533373	-0.01035	0.018492	0.0677869
ENSMUSG00000005674	Tomm40l	TOMM40L	84134	0	0	0	-0.00411462	0.000169406	0.00128771	0.00562957	0.000371853	0.00477156	0.00246737	0.035376	0.106082
ENSMUSG00000005682	Pan2	PAN2	9924	0	0	0	-0.00531371	0.0282424	0.0441505	-0.0064557	0.0965583	0.174067	-0.00390883	0.463453	0.630053
ENSMUSG00000005683	Cs	CS	1431	0	0	0	-0.00606704	7.23e-05	0.000863307	0.00240265	0.0154227	0.0418988	0.0016133	0.196475	0.353352
ENSMUSG00000005686	Ampd3	AMPD3	272	0	0	0	0.018839	0.000193619	0.00136829	0.020896	0.000875437	0.00686497	-0.0340128	0.000678147	0.0139731
ENSMUSG00000005687	Bcas2	BCAS2	10286	0	0	0	0.00299315	0.00288191	0.00689296	0.00108721	0.337368	0.46023	-0.00518539	0.0143507	0.0570834
ENSMUSG00000005698	Ctcf	CTCF	10664	0	0	0	-0.000592049	0.683599	0.728493	0.0078327	0.0146245	0.0402367	0.0116339	0.0150666	0.058907
ENSMUSG00000005699	Pard6a	PARD6A	50855	0	0	0	0.00898503	0.000705245	0.0027266	-0.00311531	0.177194	0.280529	0.00242392	0.46252	0.629308
ENSMUSG00000005718	Tfap4	TFAP4	7023	0	0	0	-0.000289561	0.846293	0.872765	-0.00444814	0.117177	0.2036	-0.00673155	0.115888	0.244285
ENSMUSG00000005732	Ranbp1	RANBP1	5902	0	0	0	0.00322365	0.0242864	0.0385616	-0.00448454	0.0569541	0.114852	-0.000846877	0.782387	0.868391
ENSMUSG00000005779	Psmb4	PSMB4	5692	0	1	0	0.00251819	0.00318768	0.00740748	-0.00387604	0.00505315	0.018702	0.00134592	0.36235	0.534599
ENSMUSG00000005802	Slc30a4	SLC30A4	7782	0	0	0	0.00369409	0.00749353	0.0143299	0.0124171	0.000731031	0.00623604	-0.00781859	0.0180369	0.0667773
ENSMUSG00000005803	Sqor	SQOR	58472	0	0	0	-0.00653596	0.00156704	0.0045271	0.00416479	0.0692368	0.134295	0.00481605	0.143252	0.282504
ENSMUSG00000005804	Bloc1s6	BLOC1S6	26258	0	0	0	0.00709002	0.000483916	0.00220032	0.00378458	0.0370669	0.0823708	-0.00611293	0.0275184	0.0892066
ENSMUSG00000005813	Metap1	METAP1	23173	0	0	0	0.00796082	0.000486276	0.00220491	0.00615331	0.00823663	0.0262764	0.00691411	0.0268792	0.0877813
ENSMUSG00000005823	Gpr108	GPR108	56927	0	0	0	0.00267547	0.00652788	0.012826	0.00537614	0.00381442	0.0155513	0.00339838	0.0986677	0.218329
ENSMUSG00000005846	Rsl1d1	RSL1D1	26156	0	0	0	0.0171736	1.22e-06	0.000191189	-0.00538142	0.00204441	0.0105828	0.0187152	0.000109615	0.00985268
ENSMUSG00000005871	Apc	APC	324	0	0	0	0.00276462	0.114698	0.152151	0.00433114	0.144733	0.240033	-0.00351803	0.403951	0.575706
ENSMUSG00000005873	Reep5	REEP5	7905	0	0	0	-0.00257304	0.00441661	0.0094142	0.00329418	0.0154676	0.0419808	-0.00170606	0.306249	0.478031
ENSMUSG00000005881	Ergic3	ERGIC3	51614	0	0	0	0.000348621	0.724395	0.76548	0.00408404	0.0424142	0.0914879	-0.000196503	0.938861	0.966686
ENSMUSG00000005882	Uqcc1	UQCC1	55245	0	0	0	0.00613912	0.0022896	0.00581421	0.000474077	0.823756	0.880314	0.00515912	0.137425	0.274275
ENSMUSG00000005886	Ncoa2	NCOA2	10499	0	0	0	-0.00648621	0.00268059	0.00652746	0.0123817	0.00194572	0.0103003	-0.00673067	0.0881911	0.201383
ENSMUSG00000005893	Nr2c2	NR2C2	7182	0	0	0	-0.00193814	0.378577	0.435901	-0.00474207	0.223549	0.336588	-0.00229515	0.680614	0.800828
ENSMUSG00000005897	Nr2c1	NR2C1	7181	0	0	0	0.0142142	0.000425699	0.00204622	-0.000322002	0.913555	0.943049	0.000504717	0.909216	0.950357
ENSMUSG00000005899	Smpd4	SMPD4	55627	0	0	0	-0.00476096	0.0160709	0.027021	-0.000658877	0.810047	0.871362	0.00642627	0.148881	0.290698
ENSMUSG00000005907	Pex1	PEX1	5189	0	0	0	-0.00912354	0.000457692	0.00213241	0.00458606	0.0435556	0.0933276	0.00303248	0.313948	0.486155
ENSMUSG00000005917	Otx1	OTX1	5013	0	0	0	-0.01051	0.000492657	0.00222152	0.00522604	0.0488295	0.101968	0.00864185	0.0338906	0.103114
ENSMUSG00000005936	Kctd20	KCTD20	222658	0	0	0	0.00269305	0.0188469	0.030965	-0.00209871	0.214964	0.326618	0.00456918	0.0902883	0.204806
ENSMUSG00000005949	Ctns	CTNS	1497	0	0	0	-0.00187398	0.43104	0.488325	0.00507226	0.230948	0.344555	-0.000759178	0.900144	0.945354
ENSMUSG00000005958	Ephb3	EPHB3	2049	0	0	0	-0.00564555	0.0216399	0.034971	0.00421664	0.246177	0.361384	6.92e-06	0.998942	0.999594
ENSMUSG00000005968	Tuft1	TUFT1	7286	0	0	0	0.000758458	0.728616	0.768875	0.0122619	0.0124475	0.0356711	-0.00568736	0.332341	0.505314
ENSMUSG00000005973	Rcn1	RCN1	5954	0	0	0	0.00692619	3.16e-05	0.000624359	-0.00994115	6.49e-05	0.00271749	-0.0027743	0.0332916	0.101779
ENSMUSG00000005981	Trap1	TRAP1	10131	0	0	0	0.00661314	0.000586713	0.00245053	-0.00868419	0.0014507	0.00872555	-0.00713794	0.013826	0.0554756
ENSMUSG00000005982	Naa60	NAA60	79903	0	0	0	-0.00701167	0.000931381	0.00320644	0.0133153	0.000672552	0.0060117	0.00346384	0.235901	0.400759
ENSMUSG00000005983	1700037C18Rik	C16orf90	646174	0	0	0	-0.00244293	0.044317	0.0656123	0.00105042	0.563007	0.671267	0.00688756	0.0331858	0.101573
ENSMUSG00000005986	Ankrd13d	ANKRD13D	338692	0	0	0	-0.00253217	0.309476	0.365103	0.0113377	0.0252648	0.0612999	-0.00154763	0.803503	0.882737
ENSMUSG00000006005	Tpr	TPR	7175	0	1	0	0.0130382	8.38e-05	0.000913891	-0.00356064	0.0721216	0.138754	0.0031375	0.254257	0.421304
ENSMUSG00000006010	BC003331	ODR4	54953	0	0	0	0.00280003	0.0293523	0.0456671	-0.00516793	0.0236846	0.0584074	-0.00613059	0.056526	0.146968
ENSMUSG00000006014	Prg4	PRG4	10216	0	0	0	0.0472187	2.76e-05	0.000594621	0.00110468	0.819539	0.877201	0.0471874	0.000967483	0.01511
ENSMUSG00000006019	Dhx34	DHX34	9704	0	0	0	-0.00375551	0.180592	0.227546	0.00549149	0.244175	0.358997	0.00362199	0.595018	0.740012
ENSMUSG00000006021	Kptn	KPTN	11133	0	0	0	0.000376064	0.788161	0.82178	0.0140667	0.00141259	0.00863709	0.00952156	0.0296247	0.0938281
ENSMUSG00000006024	Napa	NAPA	8775	0	0	0	0.0115921	9.7e-06	0.00037113	-0.00745475	0.000509615	0.00535812	0.0048709	0.0100858	0.0452834
ENSMUSG00000006050	Sra1	SRA1	10011	0	0	0	0.0042875	0.000104895	0.00101781	0.00552608	0.00029799	0.00436701	0.000475835	0.604066	0.747325
ENSMUSG00000006057	Atp5g1	NA	NA	0	0	0	-0.00142198	0.0034701	0.00790325	-0.0123119	6.82e-06	0.0018174	-0.00106092	0.227217	0.391308
ENSMUSG00000006058	Snf8	SNF8	11267	0	0	0	-0.0070231	0.00140568	0.00419046	-0.0106566	0.00220376	0.011116	-0.00609802	0.0844488	0.194985
ENSMUSG00000006095	Tbcb	TBCB	1155	0	0	0	-0.00163819	0.01666	0.027864	-0.00103706	0.290205	0.409724	-0.00112996	0.435931	0.605225
ENSMUSG00000006127	Inpp5k	INPP5K	51763	0	0	0	-0.00762348	0.00204974	0.00539554	0.00214784	0.40735	0.530577	0.00664487	0.115468	0.243673
ENSMUSG00000006134	Crkl	CRKL	1399	0	0	0	0.00230715	0.0209774	0.0340303	0.00172751	0.241966	0.357034	0.0121404	0.00148654	0.0176411
ENSMUSG00000006169	Clint1	CLINT1	9685	0	0	0	0.00739415	0.00188601	0.00511643	-4.13e-05	0.986381	0.991669	0.0129202	0.00830184	0.0401917
ENSMUSG00000006191	Cdkal1	CDKAL1	54901	0	0	0	-0.000640859	0.674949	0.720597	0.00174137	0.512846	0.626343	0.00537326	0.202827	0.361932
ENSMUSG00000006205	Htra1	HTRA1	5654	1	0	0	0.0405585	0.000588199	0.00245584	-0.00919123	0.333239	0.455902	-0.0269684	0.0842148	0.194669
ENSMUSG00000006215	Zbtb17	ZBTB17	7709	0	0	0	0.0109421	0.000369843	0.00188884	0.0138051	0.00106573	0.00747921	-0.00452769	0.195791	0.352509
ENSMUSG00000006219	Fblim1	FBLIM1	54751	0	0	0	-0.00816532	0.00156844	0.0045271	0.00400218	0.142166	0.237117	-0.00566284	0.164782	0.311486
ENSMUSG00000006235	Epor	EPOR	2057	0	0	0	-0.0145144	6.99e-05	0.000856163	0.00850299	0.00319484	0.013891	0.00521041	0.0939436	0.210357
ENSMUSG00000006262	Mob1b	MOB1B	92597	0	0	0	6.8e-05	0.944465	0.954645	0.00510888	0.0168463	0.0447555	0.00181015	0.482437	0.645674
ENSMUSG00000006273	Atp6v1b2	ATP6V1B2	526	0	0	0	0.0108952	0.000236626	0.0015106	0.00685397	0.00818706	0.026184	-0.00480198	0.126605	0.259892
ENSMUSG00000006276	Eps15l1	EPS15L1	58513	0	0	0	0.0053165	0.00364694	0.00818439	0.00255565	0.243846	0.358656	0.00642258	0.0721185	0.17479
ENSMUSG00000006281	Tep1	TEP1	7011	0	0	0	0.0107981	0.000275874	0.00162667	-0.00394668	0.0768343	0.145793	-0.00324451	0.293205	0.462706
ENSMUSG00000006288	Ttc5	TTC5	91875	0	0	0	0.00313084	0.00854047	0.0159645	0.0111084	0.000677972	0.0060405	-0.00356512	0.154923	0.298571
ENSMUSG00000006289	Osgep	OSGEP	55644	0	0	0	-0.00695224	0.00114222	0.00365	-0.00153799	0.436101	0.55632	-0.00738603	0.0340781	0.103496
ENSMUSG00000006299	Aamp	AAMP	14	0	0	0	0.00402421	0.00196031	0.0052434	-0.000157041	0.906254	0.937646	0.0103634	0.00205743	0.0200665
ENSMUSG00000006301	Tmbim1	TMBIM1	64114	0	0	0	0.000554701	0.464356	0.521004	-0.015118	0.000116434	0.00307044	-1.52e-05	0.993768	0.997016
ENSMUSG00000006304	Arpc2	ARPC2	10109	0	0	0	0.00811128	9.01e-05	0.000956148	-0.00461843	0.00448995	0.0173472	-0.0166876	0.000215385	0.011514
ENSMUSG00000006307	Kmt2b	KMT2B	9757	0	0	0	-0.00139686	0.501157	0.557134	-0.00427806	0.248318	0.36364	0.00798022	0.164842	0.311546
ENSMUSG00000006315	Tmem147	TMEM147	10430	0	0	0	0.004357	0.00712719	0.0137872	-0.00942473	0.00316066	0.013825	-0.00688824	0.0530567	0.140624
ENSMUSG00000006333	Rps9	RPS9	6203	0	0	0	0.00494287	0.00034729	0.00182935	-0.000509987	0.600213	0.702808	-0.00177775	0.245302	0.411474
ENSMUSG00000006335	Tfpt	TFPT	29844	0	0	0	0.0122906	0.000961014	0.00326522	-0.00303088	0.363457	0.487907	0.00860888	0.111786	0.238499
ENSMUSG00000006356	Crip2	CRIP2	1397	0	0	0	-0.0128155	2.62e-06	0.000271226	-0.00451452	0.0016861	0.00951702	0.00294131	0.0420115	0.120123
ENSMUSG00000006360	Crip1	CRIP1	1396	0	0	0	-0.0439171	8.74e-07	0.00018653	0.00174592	0.475299	0.592505	-0.0174184	0.00272701	0.0224834
ENSMUSG00000006369	Fbln1	FBLN1	2192	0	0	0	-0.0031345	0.0135309	0.0233087	0.00619676	0.00817037	0.0261525	-0.00784918	0.0163458	0.0623528
ENSMUSG00000006373	Pgrmc1	PGRMC1	10857	0	0	0	-0.00266898	0.0180916	0.029892	-0.00335294	0.063111	0.124761	-0.00219036	0.367665	0.539658
ENSMUSG00000006378	Gcat	GCAT	23464	0	0	0	0.000134734	0.917682	0.932352	0.00170444	0.456144	0.574069	0.00290854	0.402089	0.574347
ENSMUSG00000006390	Elovl1	ELOVL1	64834	0	0	0	-0.0012867	0.010241	0.0185258	0.00229774	0.00942841	0.0290016	-0.00300701	0.0164897	0.062776
ENSMUSG00000006392	Med8	MED8	112950	0	0	0	-0.00133649	0.158113	0.202531	-0.0101116	0.00087701	0.00686962	-0.00397719	0.112138	0.238937
ENSMUSG00000006395	Hyi	HYI	81888	0	0	0	0.00840164	0.0487315	0.0713996	-0.00184101	0.77326	0.842405	-0.00402463	0.674559	0.796383
ENSMUSG00000006398	Cdc20	CDC20	991	0	1	0	-0.00640809	0.000393357	0.00196593	-0.00980942	0.00057771	0.00568127	0.01263	0.000988112	0.0152021
ENSMUSG00000006403	Adamts4	ADAMTS4	9507	0	0	0	-0.0172552	0.000197727	0.0013782	0.0106875	0.00710489	0.0236761	-0.00694333	0.140063	0.277794
ENSMUSG00000006412	Pfdn2	PFDN2	5202	0	0	0	0.00377791	0.0131945	0.0228145	-0.00761143	0.00737273	0.02423	-0.00503506	0.137041	0.273681
ENSMUSG00000006418	Rnf114	RNF114	55905	1	0	0	0.0141411	7.31e-05	0.000863307	0.0115595	0.00105612	0.00742594	0.0079339	0.0196578	0.0705632
ENSMUSG00000006423	C330007P06Rik	CXorf56	63932	0	0	0	-0.00540153	0.00116101	0.00368535	-0.00586825	0.00612395	0.0213587	0.0103627	0.00331259	0.0245759
ENSMUSG00000006442	Srm	SRM	6723	0	0	0	0.0282869	0.000579108	0.002428	-0.0044692	0.490797	0.606865	0.00404592	0.675613	0.797381
ENSMUSG00000006445	Epha2	EPHA2	1969	0	0	0	0.0211262	3.68e-05	0.000672511	0.0119146	0.00206836	0.010655	-0.0132935	0.00614292	0.0339329
ENSMUSG00000006456	Rbm14	RBM14	10432	0	0	0	-0.00687634	0.00111775	0.00361113	-0.00749365	0.00576766	0.0205168	0.00683712	0.0426146	0.121241
ENSMUSG00000006457	Actn3	ACTN3	89	0	0	0	-0.0039353	0.0110848	0.0197804	0.0119698	0.00142124	0.00864806	-0.00102842	0.740428	0.839328
ENSMUSG00000006463	Zdhhc24	ZDHHC24	254359	0	0	0	-0.0049031	0.00780341	0.0147939	-0.0196776	0.000408829	0.00488715	0.000241838	0.945475	0.971198
ENSMUSG00000006464	Bbs1	BBS1	582	0	0	0	0.000392333	0.878811	0.899812	0.00697436	0.147568	0.243817	0.0108714	0.136461	0.272922
ENSMUSG00000006471	Ndor1	NDOR1	27158	0	0	0	0.00242113	0.122553	0.161429	-0.00109953	0.656764	0.750737	0.0143849	0.00590044	0.0333174
ENSMUSG00000006476	Nsmf	NSMF	26012	0	0	0	0.0132407	0.0170281	0.0283553	0.0118451	0.153627	0.251843	-0.00678613	0.560701	0.712476
ENSMUSG00000006494	Pdk1	PDK1	5163	0	0	0	-0.00394261	0.104392	0.140137	0.00463912	0.241228	0.356313	-0.00919773	0.137564	0.274361
ENSMUSG00000006498	Ptbp1	PTBP1	5725	1	0	0	0.00277621	0.0031701	0.00738019	-0.00367645	0.00916163	0.0283268	0.000803507	0.613203	0.752909
ENSMUSG00000006517	Mvd	MVD	4597	0	0	1	-0.0173934	0.000272115	0.00162279	0.0129982	0.00480455	0.0180981	0.01086	0.0493267	0.134485
ENSMUSG00000006526	Tmem110	STIMATE	375346	0	0	0	-0.00714576	0.00161486	0.00460928	-0.00364076	0.132254	0.224146	-0.000161623	0.961238	0.980523
ENSMUSG00000006527	Sfmbt1	SFMBT1	51460	0	0	0	-0.00139439	0.460652	0.517566	0.00341776	0.302905	0.423054	0.00651766	0.20473	0.363991
ENSMUSG00000006575	Rundc3a	RUNDC3A	10900	0	0	0	0.00106461	0.549686	0.605295	-0.00888903	0.0195825	0.0503639	-0.00153654	0.737611	0.837878
ENSMUSG00000006576	Slc4a3	SLC4A3	6508	0	0	0	0.00109915	0.550727	0.606149	0.00661519	0.0665224	0.129977	-0.00680931	0.180804	0.333076
ENSMUSG00000006585	Cdt1	CDT1	81620	0	1	0	0.00166558	0.0350458	0.0533854	0.00769693	0.000896329	0.00690842	-0.011122	0.0010271	0.0154063
ENSMUSG00000006589	Aprt	APRT	353	0	0	0	-0.00289482	0.00265254	0.00647567	-0.00760724	0.000652622	0.0060117	-0.0183553	0.000121853	0.0101511
ENSMUSG00000006599	Gtf2h1	GTF2H1	2965	0	0	0	0.0134847	5.08e-05	0.000737503	0.00604392	0.00670551	0.0227697	-0.0122624	0.00220778	0.0207041
ENSMUSG00000006611	Hfe	HFE	3077	1	0	0	0.00314709	0.0587269	0.084285	-0.00367452	0.17199	0.274302	-0.00232706	0.541677	0.696972
ENSMUSG00000006638	Abhd1	ABHD1	84696	0	0	0	-0.00799832	0.00609318	0.0121684	0.010834	0.0174359	0.0458756	-0.00336736	0.539403	0.695063
ENSMUSG00000006641	Slc5a6	SLC5A6	8884	0	0	0	-0.0012896	0.237921	0.289617	0.00120933	0.502691	0.617175	-0.00617431	0.0480936	0.132289
ENSMUSG00000006673	Qrich1	QRICH1	54870	0	0	0	0.00652012	0.00284423	0.00682568	0.00241794	0.326424	0.448509	0.00714083	0.0788335	0.185873
ENSMUSG00000006675	P4htm	P4HTM	54681	0	0	0	-0.00261763	0.0774045	0.107569	0.00426159	0.092668	0.168487	-0.00319273	0.363118	0.53525
ENSMUSG00000006676	Usp19	USP19	10869	0	0	0	0.00537187	0.0335129	0.0513512	0.0065369	0.108089	0.190824	0.00913368	0.131468	0.266524
ENSMUSG00000006678	Pola1	POLA1	5422	0	1	0	-0.0082554	7.25e-05	0.000863307	0.00487746	0.00316504	0.0138304	-0.012511	0.00051993	0.0133363
ENSMUSG00000006699	Cdc42	CDC42	998	0	0	0	0.0021718	0.0016528	0.00467672	-0.00320221	0.00290603	0.0131716	0.00703493	0.000810052	0.0144077
ENSMUSG00000006705	Pknox1	PKNOX1	5316	0	0	0	-0.00551237	0.002866	0.00686351	-0.000534299	0.793329	0.858545	0.00227599	0.46292	0.629628
ENSMUSG00000006715	Gmnn	GMNN	51053	0	1	0	-0.016071	2.97e-05	0.000611907	0.00896511	0.00180673	0.0098753	0.0177985	0.000720455	0.0140407
ENSMUSG00000006717	Acot13	ACOT13	55856	0	0	0	-0.00582088	0.00503033	0.0104631	-0.00173428	0.492943	0.608926	0.000689867	0.854351	0.916607
ENSMUSG00000006720	Zfp184	NA	NA	1	0	0	0.00345812	0.107939	0.144187	0.0108814	0.0124922	0.0357419	0.00305895	0.547804	0.701822
ENSMUSG00000006728	Cdk4	CDK4	1019	0	1	0	0.00411055	0.000784353	0.00290013	0.00187094	0.099667	0.178378	0.00476618	0.0148552	0.0584197
ENSMUSG00000006731	B4galnt1	B4GALNT1	2583	0	0	0	-0.00540755	0.0319119	0.0491944	-0.00930518	0.0338853	0.0768518	-0.00737787	0.207688	0.367738
ENSMUSG00000006732	Mettl1	METTL1	4234	0	0	0	0.0119419	0.000231381	0.00148624	-0.0066347	0.0133682	0.0375782	0.0130661	0.00445699	0.0287349
ENSMUSG00000006736	Tspan31	TSPAN31	6302	0	0	0	-0.0109104	2.02e-05	0.000531237	-0.00654543	0.00104939	0.00740136	-0.0115526	0.000615997	0.0138047
ENSMUSG00000006740	Kif5b	KIF5B	3799	0	0	0	0.00554658	0.000852098	0.00304781	-0.00192682	0.19999	0.308382	0.000696285	0.74404	0.84167
ENSMUSG00000006763	Saal1	SAAL1	113174	0	0	0	-0.00824596	0.000848514	0.00304484	0.0032116	0.156662	0.255155	-0.00536332	0.12258	0.254043
ENSMUSG00000006782	Cnp	CNP	1267	0	0	0	-0.01384	0.000279633	0.00163883	0.010048	0.00553016	0.0199448	0.00694735	0.101009	0.22222
ENSMUSG00000006800	Sulf2	SULF2	55959	0	0	0	0.00224589	0.0818727	0.113023	0.00919164	0.00307666	0.0135709	-0.00205366	0.496463	0.658256
ENSMUSG00000006818	Sod2	SOD2	6648	0	0	0	-0.00289668	0.0117606	0.0207561	-0.000480961	0.756052	0.830105	0.00163016	0.487629	0.6504
ENSMUSG00000006850	Tmco6	TMCO6	55374	0	0	0	0.00128296	0.711952	0.754422	-0.00493916	0.417958	0.539545	-0.00271163	0.763682	0.855285
ENSMUSG00000006906	Stambp	STAMBP	10617	0	0	0	0.00114822	0.198163	0.247002	0.00568321	0.0056382	0.0202108	0.00304904	0.188429	0.343307
ENSMUSG00000006920	Ezh1	EZH1	2145	0	0	0	0.00691384	0.0123663	0.0216628	0.00179098	0.63227	0.729812	-0.00033932	0.951522	0.974173
ENSMUSG00000006931	P3h4	P3H4	10609	0	0	0	0.000686505	0.386246	0.443684	-0.00061234	0.647916	0.743223	-0.018772	0.000279021	0.0119222
ENSMUSG00000006932	Ctnnb1	CTNNB1	1499	0	0	0	-0.00562767	0.0178013	0.0294799	-0.00169726	0.609755	0.711142	-0.0125018	0.0345304	0.104284
ENSMUSG00000006941	Eif1b	EIF1B	10289	0	0	0	0.00625704	0.000275699	0.00162661	0.00312225	0.0254672	0.0616734	-0.0060249	0.00889738	0.0418496
ENSMUSG00000006958	Chrd	CHRD	8646	0	0	0	-0.00280958	0.0523068	0.076015	0.00213844	0.337049	0.459905	-0.000429406	0.895144	0.942084
ENSMUSG00000006998	Psmd2	PSMD2	5708	0	1	0	-0.00945545	0.000118969	0.00107504	0.000156733	0.910636	0.941328	-0.0136785	0.000950612	0.01511
ENSMUSG00000007021	Syngr3	SYNGR3	9143	0	0	0	-0.00687334	0.0016104	0.00459935	0.00609437	0.0213159	0.0538428	-2.12e-05	0.994755	0.99737
ENSMUSG00000007029	Vars	VARS	7407	1	0	0	0.0228388	0.00318864	0.0074082	-0.00551898	0.52798	0.64018	-0.0111159	0.404192	0.575762
ENSMUSG00000007036	Abhd16a	ABHD16A	7920	0	0	0	0.00468247	0.011156	0.0198855	-0.000765078	0.756821	0.830506	-0.013053	0.00867185	0.0413446
ENSMUSG00000007038	Neu1	NEU1	4758	0	0	0	0.000462945	0.606941	0.658358	0.0132309	0.00037535	0.00477864	-0.00178241	0.451253	0.619505
ENSMUSG00000007039	Ddah2	DDAH2	23564	0	0	0	-0.00474931	0.00355524	0.00803636	0.028335	4.21e-05	0.00244479	0.00635758	0.0499068	0.135608
ENSMUSG00000007041	Clic1	CLIC1	1192	0	0	0	-0.00148441	0.0363704	0.0551607	0.00497152	0.0027528	0.0127964	0.0066278	0.00422701	0.0277595
ENSMUSG00000007050	Lsm2	LSM2	57819	0	0	0	-0.00975245	0.000286713	0.00166413	-0.00858583	0.00277273	0.0128265	-0.000168751	0.950103	0.97333
ENSMUSG00000007080	Pole	POLE	5426	0	1	0	-0.00956895	0.000949913	0.00324388	0.00408801	0.137335	0.231079	-0.00752622	0.0794449	0.186853
ENSMUSG00000007207	Stx1a	STX1A	6804	0	0	0	0.00552314	0.00146364	0.00430991	0.00743161	0.0035361	0.0148404	-0.000678213	0.786428	0.871861
ENSMUSG00000007216	Zfp775	NA	NA	0	0	0	-0.00640346	0.026038	0.0410713	0.00218473	0.598515	0.701528	-0.00479678	0.447001	0.616052
ENSMUSG00000007338	Mrpl49	MRPL49	740	0	0	0	-0.0113807	0.000199038	0.00138083	-0.0105802	0.00162115	0.00933367	0.00484821	0.121974	0.253338
ENSMUSG00000007379	Dennd2c	DENND2C	163259	0	0	0	-0.00785191	0.0195212	0.0319534	0.00280265	0.555374	0.66513	-0.000241428	0.97277	0.986564
ENSMUSG00000007411	Mark3	MARK3	4140	0	0	0	0.00238646	0.16617	0.211362	0.00305988	0.283884	0.402782	-0.000812807	0.844177	0.909285
ENSMUSG00000007415	Gatad1	GATAD1	57798	0	0	0	-0.0049622	0.00231294	0.00586696	0.00287781	0.125401	0.214759	-0.0111308	0.0039778	0.0270291
ENSMUSG00000007458	M6pr	M6PR	4074	0	0	0	-0.00467228	0.000190997	0.00136471	-0.00419054	0.00175358	0.00968195	-0.00879849	0.00058208	0.0137814
ENSMUSG00000007476	Lrrc8a	LRRC8A	56262	0	0	0	0.0170286	1.48e-05	0.000458215	0.00538807	0.0083035	0.026394	-0.00510688	0.0514011	0.137866
ENSMUSG00000007564	Ppp2r1a	PPP2R1A	5518	0	1	0	0.000851789	0.0777933	0.108017	0.00331875	0.00346984	0.0146584	0.00475801	0.0040993	0.0272721
ENSMUSG00000007570	Fance	FANCE	2178	0	0	0	0.0147015	0.0596882	0.0855145	0.00356124	0.76366	0.83529	0.00371851	0.833686	0.902547
ENSMUSG00000007589	Tinf2	TINF2	26277	0	1	0	0.00183553	0.0845445	0.116277	0.0108979	0.000899038	0.00691196	-0.0019824	0.429685	0.599257
ENSMUSG00000007594	Hapln4	HAPLN4	404037	0	0	0	-0.000701776	0.739043	0.778226	-0.00753488	0.0692695	0.134335	-0.00433007	0.437406	0.606757
ENSMUSG00000007603	Dus3l	DUS3L	56931	0	0	0	0.00601212	0.00155865	0.00451189	0.0120606	0.000962937	0.0071486	0.00683459	0.0376162	0.110824
ENSMUSG00000007610	Gtpbp3	GTPBP3	84705	0	0	0	0.00418349	0.00377762	0.00840615	0.0128666	0.000532955	0.00550768	-0.00386556	0.153665	0.297199
ENSMUSG00000007613	Tgfbr1	TGFBR1	7046	0	0	0	-0.00145343	0.341193	0.398547	0.0045706	0.105442	0.18693	0.000156695	0.967331	0.983668
ENSMUSG00000007617	Homer1	HOMER1	9456	0	0	0	-0.00371773	0.0664169	0.0939953	0.000291344	0.92502	0.951211	-0.00381375	0.419308	0.589806
ENSMUSG00000007646	Rad51c	RAD51C	5889	0	1	0	-0.01534	0.000130944	0.00113109	-0.0136868	0.00130533	0.00827313	0.00516265	0.165778	0.312902
ENSMUSG00000007655	Cav1	CAV1	857	1	0	0	-0.00642457	0.000258916	0.00158058	0.0149186	8.02e-05	0.00278027	-0.0307381	2.12e-05	0.00692937
ENSMUSG00000007656	Arpp19	ARPP19	10776	0	1	0	-0.00580289	0.000754458	0.00284476	-0.00604264	0.00427832	0.0167962	0.00914593	0.00413986	0.0274233
ENSMUSG00000007659	Bcl2l1	BCL2L1	598	0	0	0	-0.00438131	0.0124734	0.0218078	-0.00233149	0.336578	0.459426	-0.0450382	8.97e-05	0.00971321
ENSMUSG00000007670	Khsrp	KHSRP	8570	0	0	0	0.00156314	0.223759	0.27513	0.00577095	0.0244998	0.0599397	0.00625768	0.0778752	0.184388
ENSMUSG00000007721	Ccdc124	CCDC124	115098	0	0	0	-0.00176482	0.0300156	0.0465851	0.0045149	0.00628103	0.0216859	0.000783084	0.65906	0.785707
ENSMUSG00000007739	Cct4	CCT4	10575	0	0	0	0.00404936	0.00221023	0.00567737	-0.00723367	0.00201005	0.0104809	-0.0159631	0.000561451	0.0136951
ENSMUSG00000007777	0610009B22Rik	NA	NA	0	0	0	-0.00419942	0.00542989	0.0111323	-0.0133878	0.000661014	0.0060117	0.00225477	0.42479	0.594891
ENSMUSG00000007783	Cpt1c	CPT1C	126129	0	0	0	-0.00260708	0.0854033	0.117317	0.011953	0.00215586	0.0109375	-0.0236154	0.000873077	0.0147581
ENSMUSG00000007805	Twist2	TWIST2	117581	0	0	0	0.0162316	0.0179589	0.0296979	0.00583766	0.544487	0.655125	0.00622962	0.665304	0.789859
ENSMUSG00000007812	Zfp655	ZNF655	79027	0	0	0	0.0224894	7.17e-06	0.000314271	0.00229987	0.216646	0.328574	-0.00203253	0.451436	0.61959
ENSMUSG00000007815	Rhoa	RHOA	387	0	0	0	0.00266262	0.000820192	0.00297907	0.00301371	0.00348514	0.014704	0.000416252	0.681294	0.801324
ENSMUSG00000007817	Zmiz1	ZMIZ1	57178	0	0	0	0.00329789	0.0301995	0.0468387	0.00134889	0.543681	0.654294	0.00320292	0.348121	0.521202
ENSMUSG00000007827	Ankrd26	ANKRD26	22852	0	0	0	-0.00815732	0.00131871	0.00400797	-0.00666579	0.0232816	0.0575872	0.00745259	0.0678689	0.167044
ENSMUSG00000007833	Aldh16a1	ALDH16A1	126133	0	0	0	0.00339114	0.00427552	0.00919744	0.00453509	0.0124071	0.0355821	0.00348132	0.129475	0.263633
ENSMUSG00000007836	Hnrnpa0	HNRNPA0	10949	0	0	0	0.000599974	0.739376	0.778473	-0.00669141	0.0615729	0.122342	0.00529488	0.279116	0.448657
ENSMUSG00000007837	Prrg2	PRRG2	5639	0	0	0	0.000699669	0.589858	0.642909	0.00355514	0.141533	0.236232	0.0100421	0.017068	0.0641874
ENSMUSG00000007850	Hnrnph1	HNRNPH1	3187	0	0	0	-0.0116566	2.09e-05	0.000533536	-0.0157378	5.57e-05	0.00269317	0.00840641	0.00228357	0.0209545
ENSMUSG00000007867	Ift43	IFT43	112752	0	0	0	0.0015756	0.0928437	0.126384	-0.00425183	0.0191401	0.0494385	-0.00504382	0.0470807	0.130129
ENSMUSG00000007872	Id3	ID3	3399	0	0	0	-0.0173025	3.5e-07	0.000125125	0.0282023	1.14e-06	0.0010868	0.00821164	0.00115525	0.0159771
ENSMUSG00000007880	Arid1a	ARID1A	8289	0	0	0	0.005231	0.00118523	0.00373835	-0.000409998	0.782995	0.849854	0.00378098	0.122307	0.253757
ENSMUSG00000007888	Crlf1	CRLF1	9244	0	0	0	0.00725122	0.00795909	0.0150549	-0.0064499	0.0979545	0.176084	-0.00571907	0.29685	0.46757
ENSMUSG00000007891	Ctsd	CTSD	1509	0	0	0	0.00523693	0.000517308	0.00228406	0.0115721	0.00020778	0.00380321	-0.00429484	0.0360312	0.107595
ENSMUSG00000007892	Rplp1	RPLP1	6176	0	0	0	0.00606906	0.000413462	0.00201705	-0.00242978	0.0835163	0.155076	-0.0021085	0.281692	0.450564
ENSMUSG00000007950	Abhd8	ABHD8	79575	0	0	0	-0.0211896	5.7e-05	0.000794251	0.0222609	0.00035708	0.00472235	0.0037607	0.345196	0.517903
ENSMUSG00000007987	Ift22	IFT22	64792	0	0	0	-0.00143304	0.286888	0.341378	0.00163673	0.467571	0.585744	0.00858642	0.031953	0.0987744
ENSMUSG00000007989	Fzd3	FZD3	7976	0	0	0	-0.00700327	0.00455962	0.00965784	-0.0143182	0.00256215	0.0121825	0.00423093	0.351727	0.524473
ENSMUSG00000008035	Mid1ip1	MID1IP1	58526	1	0	0	0.0058712	6.87e-05	0.000853342	-0.0171664	6.03e-06	0.0018174	-0.0102304	0.000307343	0.0120825
ENSMUSG00000008036	Ap2s1	AP2S1	1175	0	0	0	-0.0117433	4.37e-05	0.000689213	0.000553578	0.681807	0.770434	-0.0109016	0.00181442	0.0190956
ENSMUSG00000008090	Fgfrl1	FGFRL1	53834	0	0	0	-0.00143694	0.451216	0.508564	0.0123285	0.00646818	0.0221678	-0.0115101	0.04354	0.123282
ENSMUSG00000008136	Fhl2	FHL2	2274	0	0	0	0.0151678	3.73e-05	0.000674487	0.0136242	0.000425874	0.00501234	0.00364109	0.172785	0.322405
ENSMUSG00000008140	Emc10	EMC10	284361	0	0	0	0.0106796	0.0181281	0.0299376	-0.00183452	0.771924	0.84143	0.00328437	0.728993	0.832054
ENSMUSG00000008167	Fbxw9	FBXW9	84261	0	0	0	0.00550749	0.000601049	0.00248662	0.00961159	0.000562325	0.00563748	-0.00567348	0.017253	0.0646704
ENSMUSG00000008200	Fnbp4	FNBP4	23360	0	0	0	-0.000499662	0.677332	0.722757	-0.00732617	0.00872133	0.0272803	0.0126652	0.00495393	0.0302256
ENSMUSG00000008206	Cers4	CERS4	79603	0	0	0	-0.00694572	0.00777308	0.0147592	0.00466252	0.189265	0.295429	0.000504481	0.919736	0.956439
ENSMUSG00000008226	Scrn3	SCRN3	79634	0	0	0	-0.0095127	0.00212561	0.00553389	-0.00185577	0.566462	0.673696	-0.00887535	0.0987077	0.218375
ENSMUSG00000008301	Phax	PHAX	51808	0	0	0	0.00466306	0.00173881	0.00484226	0.00579985	0.00580455	0.0205968	0.00828157	0.00706032	0.0368644
ENSMUSG00000008305	Tle1	TLE1	7088	0	0	0	-0.00228286	0.0472399	0.0694008	-0.000764405	0.657237	0.751128	0.00950364	0.00726993	0.0372951
ENSMUSG00000008318	Relt	RELT	84957	0	0	0	-0.00461094	0.0100132	0.018174	0.012998	0.0016861	0.00951702	0.00771448	0.0583772	0.150244
ENSMUSG00000008333	Snrpb2	SNRPB2	6629	0	0	0	-0.000235438	0.820577	0.849834	-0.000836995	0.643066	0.739215	0.000663014	0.805984	0.883863
ENSMUSG00000008348	Ubc	UBC	7316	0	1	0	0.00701431	0.000459266	0.00213317	0.018418	9.65e-05	0.00294429	-0.00768842	0.00964991	0.0439471
ENSMUSG00000008373	Prpf31	PRPF31	26121	0	0	0	-0.00183526	0.01862	0.0306484	-0.0142427	7.76e-05	0.00274839	0.0122136	0.000617832	0.0138047
ENSMUSG00000008384	Sertad1	SERTAD1	29950	0	0	0	-0.00471212	0.00141879	0.0042149	0.00174669	0.236944	0.351621	0.00670983	0.0135165	0.0546042
ENSMUSG00000008393	Carhsp1	CARHSP1	23589	0	0	0	0.00724994	0.000289948	0.00167356	-0.0157023	0.000117045	0.00307044	0.0121665	0.0012514	0.0165312
ENSMUSG00000008398	Elk3	ELK3	2004	0	0	0	-0.0229369	0.000132255	0.00113229	0.0133771	0.00599546	0.0210651	-0.0103188	0.0777432	0.184213
ENSMUSG00000008429	Herpud2	HERPUD2	64224	0	0	0	0.0102998	0.00133628	0.00404525	-0.00209902	0.492021	0.607985	0.000239218	0.957892	0.97836
ENSMUSG00000008435	Rdh13	RDH13	112724	0	0	0	0.00868576	0.000597815	0.00248132	0.00747067	0.00681748	0.0230201	0.011102	0.00707343	0.0368992
ENSMUSG00000008450	Nutf2	NUTF2	10204	0	0	0	0.00134716	0.384583	0.442085	0.00326416	0.23317	0.3468	-0.0113706	0.0195382	0.0702807
ENSMUSG00000008475	Arpc5	ARPC5	10092	0	0	0	-0.00562344	0.000244318	0.00153235	-0.00237499	0.0425388	0.0916985	0.00640396	0.00407072	0.0272174
ENSMUSG00000008540	Mgst1	MGST1	4257	0	0	0	-0.00682999	0.0086868	0.0161772	0.0139749	0.00466372	0.0177784	0.008577	0.123433	0.255334
ENSMUSG00000008575	Nfib	NFIB	4781	0	0	0	-0.0175765	6.99e-05	0.000856163	-0.0174416	0.000524388	0.00546995	-0.00681003	0.074558	0.178889
ENSMUSG00000008604	Ubqln4	UBQLN4	56893	0	0	0	0.01244	0.00110927	0.00359213	0.000756595	0.827208	0.883027	-0.00604517	0.265685	0.433318
ENSMUSG00000008668	Rps18	RPS18	6222	0	0	0	0.00709043	0.000159003	0.00123894	-0.00406198	0.00774379	0.0250747	-0.00418186	0.0357477	0.106944
ENSMUSG00000008682	Rpl10	RPL10	6134	0	0	0	0.00623365	0.00165079	0.004675	-0.00299976	0.154029	0.252268	-0.00443061	0.161735	0.307351
ENSMUSG00000008683	Rps15a	RPS15A	6210	0	0	0	0.00629913	0.00380796	0.00845391	-0.00243709	0.343872	0.467375	-0.00203039	0.592964	0.738141
ENSMUSG00000008690	Ncaph2	NCAPH2	29781	0	1	0	-0.00505128	0.000593969	0.00247181	0.00268559	0.0468147	0.0987389	-0.00691077	0.00536565	0.0315536
ENSMUSG00000008730	Hipk1	HIPK1	204851	0	0	0	0.00407693	0.00304895	0.00718139	-8.41e-05	0.956381	0.972274	-0.00149662	0.519398	0.677527
ENSMUSG00000008734	Gprc5b	GPRC5B	51704	0	0	0	0.000331423	0.810317	0.840974	0.015873	0.000904283	0.006929	-0.00343201	0.353506	0.526098
ENSMUSG00000008763	Man1a2	MAN1A2	10905	0	0	0	0.00397224	0.0580486	0.0833952	-0.000888215	0.779619	0.847359	-0.000510942	0.91418	0.95346
ENSMUSG00000008822	Acyp1	ACYP1	97	0	0	0	-0.0063612	0.0135213	0.0233028	-0.00401361	0.270017	0.387578	0.00154631	0.768709	0.85896
ENSMUSG00000008855	Hdac5	HDAC5	10014	0	0	0	-0.00414916	0.00948811	0.0173782	0.0287118	6.44e-05	0.00271749	-0.00123676	0.695032	0.810764
ENSMUSG00000008859	Rala	RALA	5898	0	0	0	0.0108358	0.0177305	0.0293967	0.00177145	0.781484	0.848733	-0.0129566	0.203035	0.362189
ENSMUSG00000008892	Vdac3	VDAC3	7419	0	0	0	0.00255567	0.0038708	0.0085503	-0.0168742	2.87e-05	0.00232828	0.000205266	0.893759	0.941492
ENSMUSG00000008958	Vps72	VPS72	6944	0	0	0	0.00807387	0.000643619	0.00258987	0.00732616	0.00598488	0.0210498	0.0116311	0.00480367	0.0296884
ENSMUSG00000008976	Gabpa	GABPA	2551	0	0	0	0.0019771	0.186116	0.233718	-0.00418108	0.114231	0.199631	0.00252126	0.49151	0.653974
ENSMUSG00000009013	Dynll1	DYNLL1	8655	0	1	0	-0.0153932	1.75e-07	0.000105368	-0.00470552	0.00085472	0.00677978	0.00543779	0.00206582	0.020079
ENSMUSG00000009030	Pdcl	PDCL	5082	0	0	0	-0.0138805	0.000143182	0.00118202	-0.0112123	0.00195323	0.0103353	0.0116364	0.00765026	0.0383855
ENSMUSG00000009035	Tmem184b	TMEM184B	25829	0	0	0	0.00104638	0.415936	0.473463	0.0082534	0.00654135	0.0223649	-0.0122288	0.00687378	0.0362619
ENSMUSG00000009073	Nf2	NF2	4771	0	0	0	-0.0030925	0.00164659	0.0046684	-0.0104553	0.000158566	0.00335925	0.0043562	0.0170621	0.0641874
ENSMUSG00000009076	Zmat5	ZMAT5	55954	0	0	0	-0.00250261	0.131978	0.172395	0.0112515	0.00406302	0.0162237	0.00488988	0.238861	0.403928
ENSMUSG00000009079	Ewsr1	EWSR1	2130	0	0	0	0.0053879	0.000209091	0.00141455	0.00370026	0.00502675	0.0186354	0.0124367	0.000312325	0.0121254
ENSMUSG00000009090	Ap1b1	AP1B1	162	0	0	0	-0.00322743	0.00488986	0.0102265	0.00138803	0.327133	0.44916	-0.00106	0.610662	0.75126
ENSMUSG00000009112	Bcl2l13	BCL2L13	23786	0	0	0	0.00279511	0.015955	0.0268696	0.00680326	0.00421521	0.0166054	-0.00130824	0.588828	0.735072
ENSMUSG00000009207	Lnpk	LNPK	80856	0	0	0	-0.00232869	0.081805	0.112943	0.00200344	0.342061	0.465355	-0.00471082	0.158499	0.302963
ENSMUSG00000009291	Pttg1ip	PTTG1IP	754	0	0	0	0.00256232	0.00913724	0.0168352	-0.00175546	0.19695	0.305052	0.000948231	0.624235	0.761557
ENSMUSG00000009293	Ube2g2	UBE2G2	7327	1	0	0	0.017693	1.31e-06	0.000197189	-0.00366045	0.0100151	0.0303588	0.0134207	0.000422552	0.0130286
ENSMUSG00000009376	Met	MET	4233	0	0	0	-0.0097773	0.00085708	0.00305291	0.018036	0.000681294	0.00606537	-0.0162144	0.00399047	0.0270326
ENSMUSG00000009406	Elk1	ELK1	2002	0	0	0	0.00123662	0.377962	0.435348	-0.000285365	0.904238	0.936831	-0.00426695	0.252091	0.418809
ENSMUSG00000009418	Nav1	NAV1	89796	0	0	0	-0.00381844	0.177748	0.224342	0.0119899	0.0292873	0.0684328	-0.00684763	0.332237	0.505282
ENSMUSG00000009470	Tnpo1	TNPO1	3842	1	0	0	0.00296898	0.00410603	0.00893213	-0.00390748	0.0126452	0.0360319	0.00451478	0.0361421	0.10773
ENSMUSG00000009471	Myod1	MYOD1	4654	0	0	0	-0.0012645	0.15916	0.203691	0.0257503	1.94e-05	0.00215564	-0.00356736	0.129735	0.263992
ENSMUSG00000009535	Rnmt	RNMT	8731	0	0	0	0.0103916	0.000183654	0.00133249	-0.013795	0.000446766	0.00510968	0.00517717	0.0730773	0.176298
ENSMUSG00000009549	Srp14	SRP14	6727	0	0	0	0.00285378	0.00594248	0.0119434	-0.00514399	0.00525961	0.0192914	0.00671713	0.00912762	0.042499
ENSMUSG00000009555	Cdk9	CDK9	1025	0	0	0	0.000393093	0.847828	0.873876	0.00209086	0.558296	0.667628	-0.00646729	0.248555	0.415347
ENSMUSG00000009563	Tor2a	TOR2A	27433	0	0	0	0.00706766	7.99e-05	0.000894867	0.0061596	0.00092465	0.0070259	-0.00733224	0.002016	0.0200026
ENSMUSG00000009566	Fpgs	FPGS	2356	0	0	0	0.0023056	0.113367	0.150612	-0.00764484	0.0108118	0.0321182	-0.0132957	0.00591381	0.0333456
ENSMUSG00000009569	Mkl2	MRTFB	57496	0	0	0	-0.00300342	0.144219	0.186658	0.00772319	0.0438126	0.0937553	0.00302012	0.541468	0.696909
ENSMUSG00000009575	Cbx5	CBX5	23468	0	0	0	-0.0106526	3.39e-05	0.000652889	-0.00190191	0.125627	0.215	0.00643258	0.00668278	0.0356375
ENSMUSG00000009585	Apobec3	APOBEC3H	164668	0	0	0	-0.0196168	0.000226399	0.00146965	-0.00405859	0.252755	0.368534	-0.0017971	0.725214	0.829871
ENSMUSG00000009614	Sardh	SARDH	1757	0	0	0	0.000518916	0.775912	0.810485	-0.0146819	0.00302649	0.0134526	0.0128509	0.0256941	0.0849555
ENSMUSG00000009621	Vav2	VAV2	7410	0	0	0	-0.00428897	0.105596	0.14147	0.000395898	0.924041	0.950375	-0.00295344	0.635506	0.769251
ENSMUSG00000009630	Ppp2cb	PPP2CB	5516	0	1	0	-0.00225586	0.150105	0.193444	-0.00216561	0.393183	0.516597	-0.00603103	0.139104	0.276469
ENSMUSG00000009633	G0s2	G0S2	50486	0	0	0	0.000467971	0.724974	0.765934	-0.0198213	0.000363636	0.00473804	-0.00709003	0.0706672	0.171893
ENSMUSG00000009640	Dmap1	DMAP1	55929	0	0	0	0.00292542	0.0114419	0.0202834	0.00660435	0.00414886	0.0163948	0.00670535	0.0199764	0.071371
ENSMUSG00000009647	Mcu	MCU	90550	0	0	0	0.0266548	0.000516434	0.00228373	-0.00390315	0.508298	0.62225	-0.0016812	0.848035	0.912054
ENSMUSG00000009681	Bcr	BCR	613	0	0	0	-0.00322978	0.0922376	0.125619	0.0124528	0.00443164	0.0172208	-0.00815728	0.0998962	0.22045
ENSMUSG00000009687	Fxyd5	FXYD5	53827	0	0	0	-0.00293049	0.0494671	0.0723477	0.00131261	0.558748	0.667789	-0.00740198	0.055322	0.144587
ENSMUSG00000009733	Tfcp2	TFCP2	7024	0	0	0	0.00283945	0.0751765	0.104816	0.00131376	0.592781	0.696888	-0.0014076	0.701684	0.815364
ENSMUSG00000009741	Ubp1	UBP1	7342	1	0	0	0.00723454	0.00188435	0.00511506	-0.00721754	0.0159164	0.0428736	0.00161712	0.64912	0.779544
ENSMUSG00000009772	Nuak2	NUAK2	81788	0	0	0	0.00523082	0.00144746	0.00427329	0.000889657	0.574327	0.680085	-0.00796442	0.0105127	0.046238
ENSMUSG00000009828	Ick	ICK	22858	1	0	0	0.00808341	0.0012757	0.00392206	0.00583905	0.0362942	0.0810158	-0.0104329	0.0178308	0.0662125
ENSMUSG00000009863	Sdhb	SDHB	6390	0	0	0	0.00159012	0.0696303	0.0980274	-0.0025749	0.0856726	0.158386	-0.0045149	0.0519844	0.13869
ENSMUSG00000009894	Snap47	SNAP47	116841	0	0	0	0.0022941	0.0366771	0.0555743	0.00628572	0.00585857	0.0207306	-0.000717796	0.766791	0.857822
ENSMUSG00000009905	Kdsr	KDSR	2531	0	0	0	-0.00411177	0.00179755	0.00494446	-0.00742665	0.00157255	0.00917389	0.00103608	0.603677	0.747006
ENSMUSG00000009907	Vps4b	VPS4B	9525	0	0	0	0.00467411	0.00059257	0.00246958	-0.000887508	0.413599	0.535913	0.00331045	0.0695742	0.170107
ENSMUSG00000009927	Rps25	RPS25	6230	0	0	0	0.00287633	0.0070743	0.013703	0.00121614	0.377531	0.502205	-0.00318456	0.148246	0.289771
ENSMUSG00000009995	Taz	TAZ	6901	0	0	0	-0.00208675	0.132666	0.173154	-0.00678738	0.0151047	0.0412603	-0.00518672	0.14667	0.287456
ENSMUSG00000010025	Aldh3a2	ALDH3A2	224	0	0	0	0.00243991	0.0186559	0.0306863	-0.0176262	0.000103059	0.00300496	0.00552263	0.0335544	0.102391
ENSMUSG00000010045	Tmem115	TMEM115	11070	0	0	0	0.00819445	0.000391696	0.00195977	-0.000902304	0.588894	0.693102	0.0056059	0.0521114	0.138864
ENSMUSG00000010047	Hyal2	HYAL2	8692	0	0	0	-0.0138194	7.6e-05	0.000873204	0.000222761	0.902118	0.935247	-0.00419835	0.152425	0.295778
ENSMUSG00000010048	Ifrd2	IFRD2	7866	0	0	0	0.0103761	0.000207692	0.00141326	0.00531965	0.0164705	0.0440549	-0.00383265	0.175304	0.325935
ENSMUSG00000010051	Hyal1	HYAL1	3373	0	0	0	0.00488385	0.0201324	0.0328505	0.00642034	0.0591627	0.118367	0.00537348	0.249898	0.416435
ENSMUSG00000010054	Tusc2	TUSC2	11334	0	0	0	0.0103245	0.00256818	0.0063442	0.0105878	0.02078	0.052757	-0.00600349	0.297309	0.467843
ENSMUSG00000010057	Nprl2	NPRL2	10641	0	0	0	-0.000849411	0.47035	0.526806	0.0030792	0.153901	0.252116	0.00536918	0.107045	0.231023
ENSMUSG00000010067	Rassf1	RASSF1	11186	0	0	0	0.0162155	3.5e-07	0.000125125	7.61e-05	0.928135	0.952702	0.0182434	5.25e-05	0.00811477
ENSMUSG00000010095	Slc3a2	SLC3A2	6520	1	0	0	0.0338648	1.22e-06	0.000191189	-0.0119238	0.00135446	0.00843954	-0.00371958	0.245815	0.411973
ENSMUSG00000010097	Nxf1	NXF1	10482	0	0	0	-0.00130746	0.128731	0.168769	-0.0079076	0.00139388	0.00857527	0.00983326	0.00265778	0.0222747
ENSMUSG00000010110	Stx5a	STX5	6811	0	0	0	0.00155757	0.0175849	0.0291891	-0.00301228	0.0116026	0.0338004	0.0167676	0.000104108	0.00984294
ENSMUSG00000010205	Raver1	RAVER1	125950	0	0	0	-0.00556656	0.00584755	0.0118038	0.00421187	0.122294	0.210762	0.0100529	0.0266399	0.0872488
ENSMUSG00000010277	2610507B11Rik	KIAA0100	9703	0	0	0	-0.0025266	0.191944	0.240245	0.00193327	0.539112	0.650231	-0.00296705	0.531461	0.688474
ENSMUSG00000010290	AI597479	C2orf49	79074	0	0	0	-0.00325217	0.00341477	0.00780208	-0.00310717	0.037672	0.0834562	0.00129644	0.498468	0.659704
ENSMUSG00000010307	Tmem86a	TMEM86A	144110	0	0	0	-0.00633996	0.00384764	0.00851063	0.00420107	0.128852	0.219453	-0.0172936	0.00330096	0.024553
ENSMUSG00000010358	Ifi35	IFI35	3430	0	0	0	0.000257988	0.886279	0.905999	-0.000477611	0.879114	0.919966	0.0105794	0.0516178	0.138094
ENSMUSG00000010362	Rdm1	RDM1	201299	0	0	0	-0.0057204	0.00218033	0.0056292	0.000619886	0.751228	0.826351	-0.00955835	0.0119441	0.0501615
ENSMUSG00000010376	Nedd8	NEDD8	4738	0	0	0	-0.00202553	0.00339178	0.00776195	-0.004105	0.00198505	0.0104361	0.00909006	0.000549388	0.0136951
ENSMUSG00000010392	Gosr1	GOSR1	9527	0	0	0	0.00341062	0.00469353	0.00989022	-0.00241786	0.124748	0.213961	-0.00630611	0.0191765	0.0694897
ENSMUSG00000010406	Mrpl52	MRPL52	122704	0	0	0	-0.000240845	0.859939	0.88389	-0.00679602	0.0207139	0.0526359	-0.00663397	0.0941844	0.210814
ENSMUSG00000010453	Kansl3	KANSL3	55683	0	0	0	0.0166858	7.52e-05	0.000873204	0.00643706	0.018199	0.0475008	0.00401628	0.242334	0.408413
ENSMUSG00000010461	Eya4	EYA4	2070	0	0	0	-6.11e-05	0.94866	0.958293	0.0160648	0.000229895	0.00389053	-0.0124988	0.00225463	0.0208674
ENSMUSG00000010476	Ebf3	EBF3	253738	0	0	0	-0.00465892	0.0172355	0.028659	-0.00280256	0.316372	0.437669	-0.00373516	0.372948	0.544686
ENSMUSG00000010517	Faf1	FAF1	11124	0	0	0	0.0131617	0.00293934	0.00699376	-0.00117468	0.810718	0.871674	-0.00951939	0.220942	0.384305
ENSMUSG00000010554	Mettl16	METTL16	79066	0	0	0	0.00455539	0.00135621	0.00409151	-0.00868878	0.000989598	0.00722925	-0.00333349	0.130982	0.265727
ENSMUSG00000010607	Pigyl	PIGY	84992	0	0	0	-0.0104763	0.00109554	0.00356355	-0.00761446	0.0295646	0.0689564	0.00469687	0.299104	0.470085
ENSMUSG00000010608	Rbm25	RBM25	58517	0	0	0	0.00372256	0.00162832	0.00463573	-0.00323223	0.0235228	0.0580961	0.0118752	0.000840035	0.0146299
ENSMUSG00000010609	Psen2	PSEN2	5664	0	0	0	-0.00125031	0.365326	0.422795	-0.00396491	0.118994	0.206256	0.00290043	0.415064	0.585707
ENSMUSG00000010651	Acaa1b	ACAA1	30	0	0	0	-0.000274733	0.855738	0.880601	-0.0031473	0.249585	0.364982	-0.00936842	0.0423109	0.120748
ENSMUSG00000010660	Plcd1	PLCD1	5333	0	0	0	0.000284213	0.800596	0.832696	0.0112999	0.00141774	0.00864806	0.000531464	0.855755	0.917253
ENSMUSG00000010663	Fads1	FADS1	3992	0	0	0	-0.00424783	0.00109021	0.00354923	0.0011745	0.329369	0.451364	-0.00880116	0.00235297	0.0211619
ENSMUSG00000010721	Lmbr1	LMBR1	64327	0	0	0	-0.0074757	0.00469353	0.00989022	-0.00312535	0.334895	0.457566	-0.00337443	0.483097	0.646238
ENSMUSG00000010751	Tnfrsf22	NA	NA	0	0	0	-0.0136086	0.00115297	0.00366982	-0.0113503	0.0181264	0.0473298	-0.00481566	0.41197	0.583356
ENSMUSG00000010755	Cars	CARS	833	1	0	0	0.0158648	1.63e-05	0.00048184	-0.00859807	0.00130446	0.00827217	-0.00121513	0.578253	0.726467
ENSMUSG00000010830	Kdelr3	KDELR3	11015	0	0	0	-0.00627774	3.96e-05	0.000678932	0.00498516	0.00069764	0.00614209	0.0153311	5.01e-05	0.00807156
ENSMUSG00000010911	Apip	APIP	51074	0	0	0	-0.00205658	0.0829593	0.114303	-0.00559007	0.0158644	0.0427857	0.00273237	0.334611	0.508022
ENSMUSG00000010914	Pdhx	PDHX	8050	0	0	0	-0.00297958	0.206059	0.255785	-0.00667312	0.11233	0.196943	-0.00313976	0.586633	0.73305
ENSMUSG00000010936	Vac14	VAC14	55697	1	0	0	0.00398645	0.0781314	0.108434	-0.00319808	0.36703	0.491436	-0.00221677	0.671464	0.794467
ENSMUSG00000011096	Akt1s1	AKT1S1	84335	0	0	0	0.00894736	0.00014528	0.00118969	0.00603784	0.00375734	0.0153958	0.0115481	0.00162247	0.0184109
ENSMUSG00000011114	Tbrg1	TBRG1	84897	0	0	0	0.00485621	0.000706294	0.00272973	0.000747194	0.526049	0.638193	0.0188452	0.000169668	0.01114
ENSMUSG00000011148	Adssl1	ADSSL1	122622	0	0	0	0.00879006	0.0988972	0.133528	0.00347349	0.675858	0.765223	-0.00568883	0.648271	0.778933
ENSMUSG00000011158	Brf1	BRF1	2972	0	0	0	-0.000388952	0.892552	0.911434	0.00349762	0.487523	0.604058	-0.00795739	0.306318	0.478073
ENSMUSG00000011179	Odc1	ODC1	4953	0	0	0	0.0166772	2.45e-05	0.000573119	-0.00568265	0.00980454	0.0298581	-0.00914018	0.00734921	0.0375216
ENSMUSG00000011254	Thg1l	THG1L	54974	0	0	0	-0.0027692	0.00715909	0.0138298	-0.0107133	0.000431731	0.0050284	-0.00304983	0.151134	0.293992
ENSMUSG00000011256	Adam19	ADAM19	8728	0	0	0	-0.00303322	0.0930295	0.126607	0.0104844	0.00685236	0.0231174	-0.0273301	0.000968706	0.01511
ENSMUSG00000011257	Pabpc4	PABPC4	8761	0	0	0	0.011157	0.000286713	0.00166413	-0.00560401	0.0258277	0.0623484	0.00714827	0.0473044	0.130594
ENSMUSG00000011267	Zfp296	ZNF296	162979	0	0	0	0.00680171	0.00255717	0.00632793	0.00588291	0.0402041	0.0879801	0.00160036	0.661434	0.78747
ENSMUSG00000011306	Sugp1	SUGP1	57794	0	0	0	0.0125525	8.3e-06	0.000342787	0.000776323	0.449635	0.568805	0.023809	3.77e-05	0.00794883
ENSMUSG00000011427	Zfp790	NA	NA	0	0	0	0.0063196	0.0058861	0.0118593	-0.00053852	0.849853	0.898551	0.0156312	0.00738488	0.0375981
ENSMUSG00000011658	Fuz	FUZ	80199	0	0	0	-0.00304824	0.288683	0.343335	-0.00156137	0.743637	0.820014	-0.00500994	0.48914	0.651729
ENSMUSG00000011752	Pgam1	PGAM1	5223	0	0	0	-0.00665155	1.24e-05	0.000425595	0.00162319	0.0212962	0.0538048	-0.00195547	0.0488723	0.133789
ENSMUSG00000011831	Evi5	EVI5	7813	0	0	0	-0.000680235	0.70164	0.744805	-0.0126315	0.00474939	0.0179613	0.00594277	0.223145	0.386609
ENSMUSG00000011832	Evi5l	EVI5L	115704	0	0	0	0.00642729	0.00551145	0.0112591	6.38e-05	0.982119	0.989036	-0.00210034	0.623151	0.760572
ENSMUSG00000011837	Snapc2	SNAPC2	6618	0	0	0	0.00233277	0.0808895	0.111841	0.0135401	0.00092736	0.00703981	0.0145203	0.00289948	0.0230187
ENSMUSG00000011877	Git1	GIT1	28964	0	0	0	-0.000232546	0.867245	0.890121	0.0037001	0.154222	0.252511	-0.00635203	0.111953	0.238678
ENSMUSG00000011884	Gltp	GLTP	51228	0	0	0	-0.00839686	0.0190823	0.0313111	0.0124653	0.0368122	0.0818525	-0.00658418	0.3938	0.565893
ENSMUSG00000011958	Bnip2	BNIP2	663	0	0	0	-0.000907675	0.0248826	0.0394098	-0.017688	1.66e-06	0.00135646	0.00507516	0.00139554	0.0172408
ENSMUSG00000011960	Ccnt1	CCNT1	904	0	0	0	0.0111689	0.000478497	0.00218873	0.00327574	0.197176	0.305237	0.00297912	0.417416	0.588011
ENSMUSG00000012017	Scarf2	SCARF2	91179	0	0	0	-0.00299466	0.047237	0.0694008	0.00476656	0.0641203	0.12631	-0.00669423	0.079076	0.186214
ENSMUSG00000012076	Brms1l	BRMS1L	84312	0	0	0	-0.0167019	0.000205507	0.00140358	-0.0117269	0.00452963	0.0174381	0.00684344	0.137337	0.274146
ENSMUSG00000012114	Med15	MED15	51586	0	0	0	0.00775834	0.000160052	0.00124119	0.0174897	5.42e-05	0.00267262	-0.00222876	0.249393	0.415971
ENSMUSG00000012117	Dhdds	DHDDS	79947	0	0	0	-8.99e-05	0.933631	0.946296	-0.00669573	0.00825656	0.0262959	0.00562328	0.0764116	0.182076
ENSMUSG00000012296	Tjap1	TJAP1	93643	0	0	0	0.0043911	0.00157168	0.00452783	0.0109368	0.000459965	0.00518935	0.00645201	0.013474	0.0544675
ENSMUSG00000012405	Rpl15	RPL15	6138	0	0	0	0.00300688	0.00578392	0.0117112	-0.00339866	0.0341267	0.0772483	-0.0066445	0.0114889	0.0489144
ENSMUSG00000012422	Tmem167	TMEM167A	153339	0	0	0	-0.00709143	8.86e-05	0.000947275	-0.00452143	0.00293252	0.0132444	0.00942229	0.000966171	0.01511
ENSMUSG00000012429	Mplkip	MPLKIP	136647	0	0	0	-0.00190777	0.255812	0.308766	-0.00365606	0.209633	0.319974	0.00806534	0.0834088	0.193236
ENSMUSG00000012443	Kif11	KIF11	3832	0	0	0	-0.00825614	0.000345892	0.00182826	0.00122864	0.452336	0.571099	0.013613	0.00159327	0.0183186
ENSMUSG00000012483	Rpa3	RPA3	6119	1	1	0	-0.0124231	0.000189248	0.00135651	-0.0138392	0.000845892	0.00673417	-0.0013914	0.651452	0.780786
ENSMUSG00000012519	Mlkl	MLKL	197259	0	0	0	-0.00648084	0.000481906	0.00219817	-0.00490772	0.00885026	0.0275577	0.00331618	0.144967	0.284956
ENSMUSG00000012535	Tnpo3	TNPO3	23534	0	0	0	0.00355434	0.00649502	0.0127756	-0.00579855	0.0085701	0.0269642	0.000442259	0.856796	0.917804
ENSMUSG00000012609	Ttll5	TTLL5	23093	0	0	0	-0.00629955	0.00897587	0.016578	0.00191401	0.545168	0.655669	-0.0027594	0.561804	0.713223
ENSMUSG00000012640	Zfp715	NA	NA	0	0	0	0.0192275	0.000168706	0.00128562	0.0180338	0.00135656	0.00844046	0.0155593	0.0104168	0.0459753
ENSMUSG00000012848	Rps5	RPS5	6193	0	0	0	0.00426571	0.000209615	0.00141726	-0.00477978	0.000915647	0.00698333	-0.0080253	0.00063549	0.0138891
ENSMUSG00000012889	Podnl1	PODNL1	79883	0	0	0	-0.00384752	0.00494344	0.0103255	0.0307274	1.7e-05	0.00214971	-0.0138659	0.00160638	0.018377
ENSMUSG00000013033	Adgrl1	ADGRL1	22859	0	0	0	-0.0119848	0.00160507	0.00458821	0.0144083	0.00602264	0.0210986	0.00145182	0.794875	0.877727
ENSMUSG00000013076	Amotl1	AMOTL1	154810	0	0	0	-0.00096257	0.220797	0.272014	-0.00436857	0.0100656	0.030463	-0.000724663	0.706588	0.817989
ENSMUSG00000013089	Etv5	ETV5	2119	0	0	0	0.00991851	0.000647115	0.00259754	-0.0162138	0.000761976	0.00640088	0.0116971	0.0107567	0.0471483
ENSMUSG00000013150	Gfod2	GFOD2	81577	0	0	0	-0.00627598	0.00203785	0.00537134	0.0040108	0.0874251	0.160846	0.0041102	0.218136	0.380883
ENSMUSG00000013155	Enkd1	ENKD1	84080	0	0	0	0.00460147	0.00542124	0.0111245	0.00376222	0.0943484	0.170975	0.0177158	0.00139554	0.0172408
ENSMUSG00000013160	Atp6v0d1	ATP6V0D1	9114	0	0	0	0.00657039	0.00274196	0.00664154	0.0114082	0.00276687	0.0128195	-0.00837183	0.0458101	0.127793
ENSMUSG00000013236	Ptprs	PTPRS	5802	1	0	0	0.00774087	0.000243706	0.00153235	-0.00242941	0.107604	0.190173	-0.000742641	0.718101	0.825139
ENSMUSG00000013275	Slc41a1	SLC41A1	254428	0	0	0	-0.00664243	0.0021924	0.00565015	-0.00499008	0.0564408	0.114058	0.00311227	0.373323	0.545095
ENSMUSG00000013419	Zfp651	ZBTB47	92999	0	0	0	7.82e-05	0.940314	0.951627	0.00456956	0.0345336	0.0778912	-0.00174217	0.525952	0.683816
ENSMUSG00000013465	Nelfb	NELFB	25920	0	0	0	-0.00363787	0.0107899	0.0193534	0.000993177	0.602572	0.704993	-0.00059687	0.833936	0.902576
ENSMUSG00000013495	Tmem175	TMEM175	84286	0	0	0	0.000667413	0.536545	0.592022	-0.00236004	0.224953	0.338257	-0.0189026	0.000843881	0.0146299
ENSMUSG00000013539	Tango2	TANGO2	128989	0	0	0	-0.0114457	0.000488199	0.00220838	0.00439887	0.106964	0.189159	0.00665136	0.105857	0.229431
ENSMUSG00000013593	Ndufs2	NDUFS2	4720	0	0	0	0.00160456	0.0104078	0.0187834	0.00323717	0.00584213	0.020698	-0.00494556	0.005434	0.0317706
ENSMUSG00000013622	Atraid	ATRAID	51374	0	0	0	-0.00870656	0.000390909	0.00195797	-0.00117911	0.507439	0.621597	-0.00450281	0.121606	0.252894
ENSMUSG00000013629	Cad	CAD	790	0	0	0	0.00587888	0.00137788	0.00413077	-0.00145426	0.411369	0.53387	-0.000417864	0.872979	0.927804
ENSMUSG00000013646	Sh3bp5l	SH3BP5L	80851	1	0	0	0.00233664	0.145485	0.188086	0.0019681	0.445575	0.565182	0.0222789	0.00140944	0.0172819
ENSMUSG00000013662	Atad1	ATAD1	84896	0	0	0	0.00509633	0.00163881	0.00465558	-0.00588247	0.0072771	0.0240329	-0.00324673	0.202486	0.361435
ENSMUSG00000013663	Pten	PTEN	5728	0	0	0	-0.0104819	0.000103322	0.00101715	-0.00801624	0.00176608	0.00972281	-0.00376209	0.122506	0.253988
ENSMUSG00000013698	Pea15a	PEA15	8682	0	0	0	-0.00475564	0.000156206	0.00122678	0.0116269	3.9e-05	0.00243542	-0.00489313	0.00379843	0.0263998
ENSMUSG00000013701	Timm23	TIMM23	100287932	0	0	0	0.00462428	0.0616979	0.0880959	-0.0180234	0.00269178	0.0126153	-0.000391941	0.944351	0.970828
ENSMUSG00000013736	Trnt1	TRNT1	51095	0	0	0	0.0116532	0.000230157	0.00148338	-0.011875	0.00137238	0.00849567	0.0069391	0.0497036	0.135254
ENSMUSG00000013787	Ehmt2	EHMT2	10919	0	0	0	-0.00248603	0.0839678	0.115553	0.00858298	0.00601276	0.0210935	-0.0167651	0.00228802	0.0209545
ENSMUSG00000013822	Elof1	ELOF1	84337	0	0	0	-0.0194101	6.82e-06	0.000308383	-0.002727	0.103155	0.183444	-0.0019292	0.406025	0.577583
ENSMUSG00000013833	Med16	MED16	10025	0	0	0	0.00557823	0.200888	0.250071	0.0068019	0.346687	0.470587	0.0110634	0.31417	0.486315
ENSMUSG00000013846	St3gal1	ST3GAL1	6482	0	0	0	0.000338079	0.830318	0.858923	0.0432367	3.59e-05	0.00243542	-0.00591807	0.179139	0.330718
ENSMUSG00000013858	Tmem259	TMEM259	91304	0	0	0	0.00670696	0.0236019	0.0376315	0.00420221	0.331968	0.454544	-0.000875175	0.890055	0.93906
ENSMUSG00000013878	Rnf170	RNF170	81790	0	0	0	-0.00924746	0.000718619	0.00275595	-0.0123986	0.00165271	0.00943463	-0.00227951	0.503342	0.66385
ENSMUSG00000013921	Clip3	CLIP3	25999	0	0	0	-0.00418297	0.103671	0.1393	0.0126276	0.0140129	0.0389424	0.00988644	0.132412	0.267584
ENSMUSG00000013973	Dedd	DEDD	9191	0	0	0	-0.00066315	0.571253	0.625431	-0.00143081	0.481423	0.598623	-0.0120123	0.00539484	0.031585
ENSMUSG00000013997	Nit1	NIT1	4817	0	0	0	0.00301578	0.0534018	0.0774533	0.00332583	0.18314	0.287911	0.00178233	0.614621	0.754185
ENSMUSG00000014039	Prdm15	PRDM15	63977	1	0	0	0.00637174	0.000171766	0.00129875	-0.00125518	0.240415	0.35548	-0.0189944	9.96e-05	0.00984294
ENSMUSG00000014074	Rnf168	RNF168	165918	0	1	0	0.000799876	0.8686	0.891277	-0.00439514	0.601671	0.704227	-0.000388088	0.975362	0.987447
ENSMUSG00000014075	Tctex1d2	TCTEX1D2	255758	0	0	0	0.00064044	0.604155	0.656112	-0.00125242	0.558321	0.667628	0.00304436	0.354373	0.527017
ENSMUSG00000014077	Chp1	CHP1	11261	0	0	0	-0.00504138	0.000245629	0.00153804	0.00879103	0.000224563	0.003845	0.00381662	0.0211408	0.0741858
ENSMUSG00000014177	Tvp23b	TVP23B	51030	0	0	0	0.00148903	0.194861	0.243549	-0.00462996	0.0361163	0.0806975	0.0106792	0.00624047	0.0342567
ENSMUSG00000014195	Dnajc7	DNAJC7	7266	0	0	0	-0.0108568	6.29e-06	0.000305067	-0.0250497	1.66e-06	0.00135646	-0.00911374	0.000655944	0.0138891
ENSMUSG00000014226	Cacybp	CACYBP	27101	0	0	0	-0.00045247	0.190509	0.238606	-0.00937736	2.64e-05	0.00223753	-0.000176037	0.83332	0.902336
ENSMUSG00000014232	Cluap1	CLUAP1	23059	0	0	0	-0.000714474	0.680545	0.725646	-0.0133842	0.00350559	0.0147604	-0.00161947	0.719242	0.825844
ENSMUSG00000014243	Zswim7	ZSWIM7	125150	0	0	0	-0.00302846	0.280599	0.334834	-0.00212566	0.6483	0.743418	-0.0156076	0.0528391	0.140283
ENSMUSG00000014245	Pigl	PIGL	9487	0	0	0	0.00874275	0.00651608	0.0128082	0.00324568	0.426389	0.547524	0.00569525	0.359515	0.531935
ENSMUSG00000014294	Ndufa2	NDUFA2	4695	0	0	0	0.00342014	0.00543872	0.0111484	-0.00336506	0.0532087	0.108776	0.00459065	0.0726599	0.175624
ENSMUSG00000014301	Pam16	PAM16	51025	0	0	0	0.0031961	0.362906	0.420505	-0.00189826	0.748424	0.823979	-0.00141247	0.873159	0.927909
ENSMUSG00000014303	Glis2	GLIS2	84662	0	0	0	-0.00569917	0.0048771	0.0102075	-0.0101989	0.00444336	0.0172253	-0.00770426	0.0647899	0.161375
ENSMUSG00000014313	Cox6c	COX6C	1345	0	0	0	-0.00196151	0.115754	0.153408	-0.000120603	0.951047	0.968917	-0.00570717	0.0835742	0.19354
ENSMUSG00000014329	Bicc1	BICC1	80114	0	0	0	-0.0194004	0.000104458	0.00101781	0.00883731	0.0128226	0.0364447	-0.00311251	0.457517	0.624596
ENSMUSG00000014349	Ube2z	UBE2Z	65264	0	0	0	-0.00516151	0.00378628	0.00842049	-0.000506386	0.806112	0.86825	0.00171047	0.582281	0.729366
ENSMUSG00000014353	Tmem87b	TMEM87B	84910	0	0	0	0.00304107	0.00695708	0.013524	-0.00415142	0.0194295	0.0500502	0.0041424	0.0843397	0.19484
ENSMUSG00000014355	Anapc1	ANAPC1	64682	1	1	0	-0.00372433	0.00245218	0.00612778	-0.00338338	0.0318987	0.0732083	-0.00646238	0.0117482	0.0496304
ENSMUSG00000014361	Mertk	MERTK	10461	0	0	0	-0.0167638	8.11e-05	0.000901936	0.026803	0.00010507	0.00300496	-0.00211364	0.530665	0.68791
ENSMUSG00000014402	Tsg101	TSG101	7251	0	0	0	4.7e-05	0.934813	0.947233	-0.0133714	6.96e-05	0.00271749	-0.00931437	0.00112002	0.0159264
ENSMUSG00000014418	Hps5	HPS5	11234	0	0	0	0.00703989	0.00188173	0.00511209	0.00351118	0.155273	0.253659	0.000883371	0.797503	0.879029
ENSMUSG00000014426	Map3k4	MAP3K4	4216	0	0	0	-0.00212457	0.211536	0.262044	0.025992	0.000262675	0.00412209	-0.0171205	0.0046778	0.0293138
ENSMUSG00000014444	Piezo1	PIEZO1	9780	0	0	0	0.0162436	0.000110752	0.00104448	-0.0106203	0.00328007	0.0141272	-0.0105705	0.0166625	0.0632052
ENSMUSG00000014470	Rnf166	RNF166	115992	0	0	0	0.011811	0.00124738	0.00386721	-0.00184718	0.589106	0.693208	-0.00431343	0.40864	0.580221
ENSMUSG00000014496	Ankrd28	ANKRD28	23243	0	0	0	-0.0188948	0.000118094	0.00107392	0.0164419	0.00131923	0.0083093	-0.015262	0.00745787	0.0378518
ENSMUSG00000014498	Ankrd52	ANKRD52	283373	0	0	0	0.00541963	0.00212622	0.00553389	-0.00139814	0.451236	0.570088	0.0142318	0.00209388	0.0201973
ENSMUSG00000014503	Pkd2l2	PKD2L2	27039	0	0	0	0.00203557	0.224034	0.275393	-0.0115135	0.00432631	0.0169275	-0.00628609	0.156195	0.29961
ENSMUSG00000014504	Srp19	SRP19	6728	0	0	0	0.00259593	0.00207954	0.00545517	-0.00670544	0.000542832	0.00554861	0.00723324	0.00168365	0.0185922
ENSMUSG00000014547	Wdfy2	WDFY2	115825	0	0	0	-0.00284878	0.128385	0.168374	0.00229152	0.443577	0.563575	-0.00728591	0.132635	0.267892
ENSMUSG00000014550	Rbsn	RBSN	64145	0	0	0	0.0141047	0.000234091	0.0014986	0.00227351	0.366547	0.490903	0.00123841	0.738201	0.838216
ENSMUSG00000014551	Mrps25	MRPS25	64432	0	0	0	-0.0044655	0.00209589	0.00548171	-4.59e-05	0.975748	0.984352	0.00994842	0.00368182	0.0259428
ENSMUSG00000014554	Dguok	DGUOK	1716	0	0	0	-0.00361319	0.0219212	0.035326	-0.0021177	0.353954	0.478181	-0.0181035	0.00181276	0.0190956
ENSMUSG00000014592	Camta1	CAMTA1	23261	0	0	0	-0.00264191	0.129148	0.169238	-0.00262285	0.350418	0.474524	-0.00104922	0.798933	0.88018
ENSMUSG00000014599	Csf1	CSF1	1435	0	0	0	0.000174492	0.82786	0.856691	-0.0157203	0.00013479	0.00314023	-0.018755	0.000324738	0.0122607
ENSMUSG00000014601	Strip1	STRIP1	85369	0	0	0	0.00549513	0.00635594	0.0125669	-0.00323729	0.220739	0.333156	-0.0104166	0.023876	0.0806528
ENSMUSG00000014602	Kif1a	KIF1A	547	0	0	0	0.0110072	0.00118068	0.00373149	0.0162496	0.00202334	0.0105118	-0.00112768	0.809519	0.886334
ENSMUSG00000014606	Slc25a11	SLC25A11	8402	0	0	0	0.00150011	0.0875532	0.119853	0.00345279	0.033358	0.0759703	-0.00398548	0.0818214	0.190251
ENSMUSG00000014633	Cmc2	CMC2	56942	0	0	0	-0.00659012	0.00349843	0.0079456	0.00357895	0.19	0.296346	0.0147482	0.00630577	0.0344663
ENSMUSG00000014668	Chfr	CHFR	55743	0	0	0	-0.00262495	0.0206158	0.0335102	0.00213169	0.207092	0.317323	-0.000830942	0.729499	0.832466
ENSMUSG00000014748	Tex261	TEX261	113419	0	0	0	-0.00128805	0.154747	0.198778	-0.00162851	0.276245	0.39508	-0.000843632	0.697227	0.812367
ENSMUSG00000014763	Fam120b	FAM120B	84498	0	0	0	0.00056037	0.66826	0.714677	0.00113902	0.615444	0.715225	0.00317965	0.36172	0.533957
ENSMUSG00000014767	Tbp	TBP	6908	0	0	0	-0.000701525	0.603528	0.65556	-0.00331757	0.180743	0.284949	0.00385211	0.289493	0.458444
ENSMUSG00000014769	Psmb1	PSMB1	5689	0	1	0	-0.00058486	0.0223329	0.0359033	-0.00429358	0.00011285	0.00307044	-0.00143773	0.0287414	0.0918441
ENSMUSG00000014771	Pdcd2	PDCD2	5134	0	0	0	0.024517	0.000465734	0.00215087	0.00132204	0.800813	0.86396	-0.0181621	0.0469191	0.129845
ENSMUSG00000014776	Nol3	NOL3	8996	0	0	0	-0.00605688	0.00218925	0.00564712	0.0111916	0.001775	0.00974844	0.00293686	0.357677	0.530785
ENSMUSG00000014778	Fhod1	FHOD1	29109	0	0	0	-0.0177662	4.69e-05	0.000710644	-0.00444208	0.0615991	0.122343	-0.00147428	0.636936	0.77008
ENSMUSG00000014782	Plekhg4	PLEKHG4	25894	0	0	0	-0.0119471	0.000528322	0.0023099	0.00152294	0.566517	0.673696	-0.00777734	0.0814337	0.189581
ENSMUSG00000014786	Slc9a5	SLC9A5	6553	0	0	0	-0.00211622	0.178628	0.225378	0.0035336	0.188627	0.294577	-0.00776563	0.0714392	0.173352
ENSMUSG00000014837	4931428F04Rik	KIAA0895L	653319	0	0	0	-0.00218988	0.0740204	0.103381	0.00400862	0.0622213	0.123343	0.0200743	0.000719843	0.0140407
ENSMUSG00000014846	Tppp3	TPPP3	51673	0	0	0	-0.000640124	0.560679	0.615563	0.0202819	0.000162413	0.00342174	-0.0039981	0.187608	0.342083
ENSMUSG00000014850	Msh3	MSH3	4437	0	0	0	-0.0141958	0.00011521	0.00106014	-0.00359571	0.114168	0.199584	-0.0115051	0.00718234	0.0370424
ENSMUSG00000014856	Tmem208	TMEM208	29100	0	0	0	-0.00265121	0.0101132	0.0183294	-0.00663012	0.00257107	0.0122096	-0.00593401	0.0194712	0.0701737
ENSMUSG00000014859	E2f4	E2F4	1874	0	1	0	0.00353904	0.0448465	0.0663276	0.00212599	0.424315	0.545473	-0.00290532	0.467657	0.633736
ENSMUSG00000014867	Surf4	SURF4	6836	0	0	0	-0.00355731	0.000211101	0.00142059	0.00489296	0.000452098	0.00512587	0.00914979	0.000212762	0.011514
ENSMUSG00000014873	Surf2	SURF2	6835	0	0	0	0.0109878	0.000588899	0.00245786	-0.00414195	0.129749	0.220685	-0.0119562	0.0134425	0.0543591
ENSMUSG00000014905	Dnajb9	DNAJB9	4189	0	0	0	0.0319475	3.5e-07	0.000125125	0.00870815	0.00161547	0.00931033	0.0554468	6.29e-06	0.0067496
ENSMUSG00000014932	Yes1	YES1	7525	0	0	0	0.0161685	0.00206005	0.00541521	0.00112508	0.83608	0.889414	-0.00808609	0.335853	0.509165
ENSMUSG00000014956	Ppp1cb	PPP1CB	5500	0	1	0	0.0119784	0.000102622	0.00101715	0.00542112	0.0128586	0.0365289	0.0142132	0.00158872	0.0183129
ENSMUSG00000014959	Gorasp2	GORASP2	26003	0	1	0	0.00678441	6.4e-05	0.000826724	0.0116067	6.49e-05	0.00271749	0.0183825	5.32e-05	0.00811477
ENSMUSG00000014980	Tsen15	TSEN15	116461	0	0	0	-0.00375673	0.0285796	0.0446111	-0.00966612	0.00584502	0.0207019	-0.00695194	0.0940694	0.210598
ENSMUSG00000015002	Efr3a	EFR3A	23167	0	0	0	-0.00116322	0.247274	0.299377	-0.000951949	0.566187	0.673584	-0.000286199	0.907803	0.949554
ENSMUSG00000015013	Trappc2l	TRAPPC2L	51693	0	0	0	0.00133259	0.251257	0.303814	0.00209051	0.289321	0.408924	-0.00937364	0.0118337	0.0498976
ENSMUSG00000015016	Acsf3	ACSF3	197322	0	0	0	0.00391557	0.0776456	0.10785	-0.0035987	0.305216	0.425283	0.00660987	0.222048	0.385485
ENSMUSG00000015023	Ddx19a	DDX19A	55308	0	0	0	-0.00197103	0.213204	0.263797	0.00494423	0.0862975	0.159296	-0.0015174	0.694929	0.810727
ENSMUSG00000015027	Galns	GALNS	2588	0	0	0	0.000394188	0.763256	0.799748	0.00535421	0.0441316	0.0943516	-0.00781577	0.0483315	0.132784
ENSMUSG00000015053	Gata2	GATA2	2624	0	0	0	-0.00501965	0.0131976	0.0228145	-0.00335041	0.243587	0.358471	-0.00280335	0.502181	0.662701
ENSMUSG00000015087	Rabl6	RABL6	55684	0	0	0	0.00641778	0.0473316	0.0695266	0.00616607	0.22422	0.337332	0.0111992	0.15365	0.297199
ENSMUSG00000015092	Edf1	EDF1	8721	0	0	0	0.00192317	0.0368275	0.0557682	0.00245628	0.101285	0.180737	0.0014754	0.474268	0.63876
ENSMUSG00000015094	Npdc1	NPDC1	56654	0	0	0	0.00216243	0.00719344	0.0138747	-0.000102182	0.920568	0.947912	-0.00524065	0.00987194	0.0446207
ENSMUSG00000015095	Fbxw5	FBXW5	54461	0	0	0	-0.00555015	0.00363365	0.00816359	-0.00187395	0.399556	0.523169	-0.0171417	0.00203112	0.0200405
ENSMUSG00000015112	Slc25a13	SLC25A13	10165	0	0	0	-0.00872787	0.00599126	0.0120263	0.0010691	0.786387	0.852404	0.00559817	0.356935	0.52996
ENSMUSG00000015120	Ube2i	UBE2I	7329	0	1	0	0.00215253	0.00610551	0.0121876	-0.00189955	0.0827757	0.153876	0.00502814	0.00968322	0.0440111
ENSMUSG00000015126	Tsr3	TSR3	115939	0	0	0	0.01497	0.000111626	0.00104922	0.0072146	0.010952	0.0323499	0.0171317	0.00194423	0.0196311
ENSMUSG00000015127	Unkl	UNKL	64718	0	0	0	0.000614872	0.761771	0.798485	0.00615235	0.111497	0.195632	-0.00977463	0.0962835	0.214421
ENSMUSG00000015133	Lrrk1	LRRK1	79705	1	0	0	-0.00924622	0.000254545	0.00156882	-5.44e-05	0.973869	0.983193	-0.0125005	0.00229275	0.0209545
ENSMUSG00000015134	Aldh1a3	ALDH1A3	220	0	0	0	0.0163333	0.000618094	0.00252987	0.0129934	0.00974851	0.0297633	0.0140562	0.0366175	0.108722
ENSMUSG00000015143	Actn1	ACTN1	87	0	0	0	0.0135867	0.00013479	0.00114128	-8.93e-05	0.965473	0.978125	0.00427069	0.194737	0.351386
ENSMUSG00000015149	Sirt2	SIRT2	22933	0	0	0	0.00285903	0.00441573	0.00941409	0.00442746	0.00701652	0.0234636	-0.00325683	0.100552	0.221726
ENSMUSG00000015165	Hnrnpl	HNRNPL	3191	0	0	0	-0.00535647	0.00561469	0.0114292	-0.00201272	0.40401	0.527611	-0.00315657	0.387314	0.559031
ENSMUSG00000015176	Nolc1	NOLC1	9221	0	0	0	0.0104	0.000161713	0.00125169	-0.00453164	0.0245957	0.0601053	0.00448488	0.102164	0.224028
ENSMUSG00000015189	Casd1	CASD1	64921	0	0	0	-0.00180888	0.341204	0.398547	-0.000961622	0.763141	0.835119	-0.009734	0.0722482	0.174878
ENSMUSG00000015202	Cnksr3	CNKSR3	154043	0	0	0	-0.00114912	0.279045	0.333258	0.020318	0.000122028	0.00307112	-0.00517166	0.0812852	0.18939
ENSMUSG00000015214	Mtmr1	MTMR1	8776	0	0	0	-0.00691721	0.00799371	0.0151029	0.000694739	0.836376	0.889646	-0.00040462	0.935761	0.965123
ENSMUSG00000015217	Hmgb3	HMGB3	3149	0	0	0	-0.0296718	1.49e-06	0.00021044	-0.00575047	0.0136957	0.0382611	0.00224471	0.419433	0.589836
ENSMUSG00000015247	Nipsnap3b	NIPSNAP3B	55335	0	0	0	-0.014963	6.03e-06	0.000301237	0.0018227	0.136162	0.229477	-0.00763478	0.00336241	0.0247051
ENSMUSG00000015289	Lage3	LAGE3	8270	0	0	0	-0.00796158	0.000433916	0.00206703	-0.00711228	0.00412107	0.0163244	0.00220105	0.389874	0.561591
ENSMUSG00000015290	Ubl4a	UBL4A	8266	0	0	0	0.00497951	0.00429816	0.00922879	-0.00167327	0.422309	0.543688	0.00574387	0.0951131	0.21227
ENSMUSG00000015291	Gdi1	GDI1	2664	0	0	0	-0.00444117	0.00142684	0.00423063	-0.00311077	0.0458675	0.0972071	-0.0118464	0.0013257	0.0170359
ENSMUSG00000015312	Gadd45b	GADD45B	4616	0	0	0	0.00486039	0.00382622	0.00847802	0.0111609	0.00146101	0.00877375	0.0178611	0.00118811	0.0162002
ENSMUSG00000015335	Zdhhc12	ZDHHC12	84885	0	0	0	-0.0137468	0.000144318	0.00118521	-0.00480399	0.0503489	0.104255	-0.00788508	0.0360485	0.107619
ENSMUSG00000015337	Endog	ENDOG	2021	0	0	0	0.00382241	0.0338039	0.0517416	-0.00115217	0.66262	0.755243	-0.00390547	0.338117	0.511715
ENSMUSG00000015341	Golga7	GOLGA7	51125	0	0	0	0.00676122	0.000757168	0.00284934	0.000307597	0.854119	0.901727	0.0017623	0.487242	0.650035
ENSMUSG00000015354	Pcolce2	PCOLCE2	26577	0	0	0	-0.000344162	0.607356	0.658534	0.0195856	2.53e-05	0.0022264	0.00180094	0.315567	0.487981
ENSMUSG00000015357	Clpx	CLPX	10845	0	0	0	0.00182903	0.0373565	0.0564542	-0.0015519	0.24979	0.365188	-0.00249646	0.223944	0.387426
ENSMUSG00000015363	Trabd	TRABD	80305	0	0	0	0.00485116	0.000240647	0.00152436	0.000792985	0.363889	0.488373	0.00977742	0.000578497	0.0137814
ENSMUSG00000015377	Dennd6b	DENND6B	414918	0	0	0	0.0060184	0.00427282	0.00919334	0.00192692	0.442941	0.563028	-0.00292821	0.439961	0.609243
ENSMUSG00000015461	Atf6b	ATF6B	1388	0	0	0	0.00826713	0.000387238	0.00195326	-0.00258329	0.15152	0.249158	0.00983472	0.00569904	0.0325659
ENSMUSG00000015474	Ppt2	PPT2	9374	0	0	0	0.00182483	0.233476	0.285086	0.00392985	0.146417	0.242369	-0.00120156	0.74926	0.845402
ENSMUSG00000015478	Rnf5	RNF5	6048	0	0	0	-0.0055946	0.00266757	0.00650469	0.0042212	0.0670445	0.130819	0.00368322	0.248547	0.415347
ENSMUSG00000015488	Cacfd1	CACFD1	11094	0	0	0	-0.00385906	0.0149381	0.0253775	-0.00478821	0.0565213	0.114201	0.00708833	0.0589339	0.151167
ENSMUSG00000015501	Hivep2	HIVEP2	3097	0	0	0	0.00136768	0.499482	0.555412	0.00835005	0.0408621	0.0890575	-0.00549499	0.308178	0.480322
ENSMUSG00000015522	Arnt	ARNT	405	0	0	0	0.00509209	0.00882474	0.0163622	0.00852291	0.010593	0.031616	0.00141171	0.710442	0.820184
ENSMUSG00000015536	Mocs2	MOCS2	4338	0	0	0	-0.00782748	0.00102028	0.00341287	-0.0061395	0.0198918	0.0510572	-0.00226672	0.481804	0.645188
ENSMUSG00000015542	Nat9	NAT9	26151	0	0	0	0.0112218	0.000624476	0.00254145	-0.00834102	0.0131133	0.0370684	0.0081348	0.0676686	0.166766
ENSMUSG00000015568	Lpl	LPL	4023	0	0	0	0.00788058	0.00195507	0.00523671	-0.00196673	0.454592	0.572448	-0.0132431	0.0101958	0.0455269
ENSMUSG00000015575	Atp6v0e	ATP6V0E1	8992	0	0	0	0.00343767	0.00126809	0.0039113	0.00243775	0.0386383	0.0852337	0.00298836	0.0766778	0.182445
ENSMUSG00000015597	Zfp318	ZNF318	24149	0	0	0	-0.0113039	0.000223864	0.00146233	-0.00293472	0.161675	0.261459	-0.00136144	0.643586	0.775503
ENSMUSG00000015605	Srf	SRF	6722	0	0	0	0.0124981	0.000203322	0.00139676	0.0149164	0.000711801	0.00620183	-0.007074	0.052429	0.139388
ENSMUSG00000015619	Gata3	GATA3	2625	0	0	0	0.0103729	0.00036451	0.00186828	-0.0102774	0.00236565	0.0116093	0.0143542	0.00306425	0.0236995
ENSMUSG00000015647	Lama5	LAMA5	3911	0	0	0	0.00857858	0.00121888	0.00380857	0.00817903	0.011101	0.0327307	-0.0114774	0.0145331	0.0576488
ENSMUSG00000015652	Steap1	STEAP1	26872	1	0	0	0.00759862	3.5e-05	0.00065398	-0.0408954	8.74e-08	0.000499928	-0.00244793	0.0770969	0.182871
ENSMUSG00000015653	Steap2	STEAP2	261729	0	0	0	-0.00984094	0.00100227	0.00337335	-0.0124803	0.00288051	0.0131309	-0.015095	0.00646276	0.0349475
ENSMUSG00000015656	Hspa8	HSPA8	3312	0	0	0	-0.0166976	8.74e-08	0.000105368	0.00961539	2.6e-05	0.00223639	0.00697585	0.000455157	0.0130286
ENSMUSG00000015659	Serac1	SERAC1	84947	0	0	0	0.00683585	0.00711713	0.0137743	0.00653296	0.0731494	0.140303	0.00787657	0.135161	0.270748
ENSMUSG00000015668	Pdzd11	PDZD11	51248	0	0	0	0.00349296	0.000816346	0.0029742	-0.00532052	0.0012472	0.00806102	0.00969057	0.000663287	0.0139109
ENSMUSG00000015671	Psma2	PSMA2	5683	0	1	0	-0.00411767	0.000226136	0.00146962	-0.00734196	0.000191521	0.00366388	-0.00312204	0.0191642	0.0694674
ENSMUSG00000015672	Mrpl32	MRPL32	64983	0	0	0	0.00437724	0.00876005	0.0162687	-0.00858545	0.00553453	0.019948	-0.00449941	0.195722	0.35244
ENSMUSG00000015697	Setdb1	SETDB1	9869	0	0	0	-0.00221509	0.102061	0.137313	-0.00859513	0.00493392	0.0184397	-0.00776103	0.0381233	0.111886
ENSMUSG00000015702	Anxa9	ANXA9	8416	0	0	0	-0.00527661	0.00539746	0.0110876	-0.00779389	0.0106105	0.0316434	-0.000935966	0.787502	0.872363
ENSMUSG00000015709	Arnt2	ARNT2	9915	0	0	0	-0.00669937	0.0383011	0.0577749	0.0034729	0.470612	0.588072	0.00450201	0.533094	0.689984
ENSMUSG00000015711	Prune1	PRUNE1	58497	0	0	0	-0.00211932	0.0278833	0.0436667	0.00319577	0.0484948	0.101422	0.0145319	0.000776923	0.0143194
ENSMUSG00000015714	Cers2	CERS2	29956	0	0	0	0.00945121	2.97e-05	0.000611907	-0.00609018	0.00112421	0.00766547	0.000901644	0.543488	0.698379
ENSMUSG00000015733	Capza2	CAPZA2	830	0	0	0	-8.37e-05	0.860133	0.884011	-3.21e-05	0.96901	0.980321	-0.00148333	0.253322	0.420365
ENSMUSG00000015745	Plekho1	PLEKHO1	51177	0	0	0	0.00977799	0.00145393	0.00428763	0.0249182	0.000390035	0.00479613	-0.000870353	0.843949	0.909198
ENSMUSG00000015747	Vps45	VPS45	11311	0	0	0	-0.00648236	0.00560621	0.011416	0.00476186	0.128162	0.218473	-0.0053233	0.241115	0.406838
ENSMUSG00000015748	Prpf3	PRPF3	9129	0	0	0	-0.00613416	0.0013153	0.00400213	-0.00729977	0.00497098	0.0185298	0.00937171	0.00921967	0.0427189
ENSMUSG00000015749	Anp32e	ANP32E	81611	0	0	0	-0.00980418	1.52e-05	0.000460611	-0.00547628	0.00112386	0.00766547	0.00635122	0.00270393	0.0224478
ENSMUSG00000015750	Aph1a	APH1A	51107	0	0	0	-3.08e-05	0.968557	0.974092	0.00378967	0.0230542	0.0571639	0.00093235	0.647749	0.778796
ENSMUSG00000015755	Tab2	TAB2	23118	1	0	0	0.004718	0.00371949	0.00830588	-0.00989994	0.00192789	0.0102456	-0.0104853	0.00694414	0.0364241
ENSMUSG00000015757	Ppil4	PPIL4	85313	0	0	0	0.00991688	2.76e-05	0.000594621	-0.000651216	0.523955	0.636648	0.0129883	0.00038951	0.0127314
ENSMUSG00000015759	Cnih1	CNIH1	10175	0	0	0	0.00435064	0.00166477	0.00469667	-0.00469617	0.00977203	0.0298067	0.000640001	0.755097	0.849141
ENSMUSG00000015766	Eps8	EPS8	2059	1	0	0	-0.0104473	0.000182343	0.00132951	0.0109827	0.000999038	0.0072473	-0.0241418	0.000270979	0.0119222
ENSMUSG00000015776	Med22	MED22	6837	0	0	0	-0.001492	0.153339	0.19719	-0.0191573	0.000124563	0.00307112	0.00811314	0.0122211	0.050988
ENSMUSG00000015790	Surf1	SURF1	6834	0	0	0	-0.00709714	0.000748339	0.00282915	-0.0116607	0.000879196	0.00686962	-0.00992341	0.00650752	0.0350169
ENSMUSG00000015804	Med28	MED28	80306	0	0	0	0.00386571	0.000740822	0.00281095	0.00450105	0.00279353	0.0128707	-0.00353968	0.0358373	0.107128
ENSMUSG00000015806	Qdpr	QDPR	5860	0	0	0	-0.000913879	0.522506	0.578428	0.000447964	0.855243	0.902498	-0.00170628	0.643457	0.775464
ENSMUSG00000015837	Sqstm1	SQSTM1	8878	1	0	0	0.0404508	3.5e-07	0.000125125	-0.00286953	0.19917	0.307449	0.0197162	0.00112509	0.0159264
ENSMUSG00000015839	Nfe2l2	NFE2L2	4780	0	0	0	0.00798387	0.000634703	0.00257118	0.00432872	0.0466558	0.0984764	0.00133691	0.633813	0.767689
ENSMUSG00000015846	Rxra	RXRA	6256	0	0	0	-0.00590379	0.0180841	0.0298876	-0.000447214	0.898351	0.933241	-0.00510203	0.344456	0.517543
ENSMUSG00000015850	Adamtsl4	ADAMTSL4	54507	0	0	0	-0.0032222	0.116285	0.154042	0.00215669	0.506202	0.620349	-0.0250184	0.00207832	0.0201369
ENSMUSG00000015869	Prpsap1	PRPSAP1	5635	0	0	0	-0.0111873	7.17e-06	0.000314271	-0.0135732	3.98e-05	0.00243542	-0.013236	0.000217483	0.0115185
ENSMUSG00000015880	Ncapg	NCAPG	64151	0	1	0	-0.00669454	0.000548339	0.00235916	-0.00637082	0.00417491	0.0164636	0.0108322	0.00266722	0.0222782
ENSMUSG00000015882	Lcorl	LCORL	254251	0	0	0	0.0147177	0.000269843	0.00161623	-0.000466773	0.861936	0.90672	-0.000857315	0.830687	0.900678
ENSMUSG00000015889	Lta4h	LTA4H	4048	0	0	0	-0.00264398	0.0317813	0.0490367	0.0103233	0.00144572	0.00870279	0.00673947	0.0350719	0.105474
ENSMUSG00000015932	Dstn	DSTN	11034	0	0	0	0.00696635	6.51e-05	0.000833047	0.00279617	0.0132602	0.0373822	0.00164409	0.235826	0.40075
ENSMUSG00000015937	H2afy	H2AFY	9555	0	0	0	-0.00926596	0.00162185	0.00462372	0.0013146	0.650071	0.745022	0.00719453	0.129294	0.263471
ENSMUSG00000015942	Gtf2ird2	GTF2IRD2	84163	0	0	0	0.00614291	0.07524	0.104879	-0.00969821	0.0984658	0.176753	0.00145007	0.854916	0.916861
ENSMUSG00000015943	Bola1	BOLA1	51027	1	0	0	-0.00522363	0.00479073	0.0100561	-0.0193625	0.000347378	0.00470296	-0.00019565	0.953074	0.975152
ENSMUSG00000015944	Gatsl2	CASTOR2	729438	0	0	0	-0.0141259	0.000560577	0.00239024	-0.000989358	0.756244	0.830105	0.00215542	0.652413	0.781241
ENSMUSG00000015961	Adss	ADSS	159	0	0	0	0.00438695	0.000339598	0.00180614	-0.00776426	0.000298339	0.00436701	-0.0130308	0.000206731	0.0113429
ENSMUSG00000015971	Actr8	ACTR8	93973	0	0	0	0.00190214	0.0999767	0.134874	0.00778584	0.0039243	0.0158356	0.00322902	0.254706	0.421738
ENSMUSG00000015994	Fnta	FNTA	2339	0	0	0	0.00421507	0.184386	0.231723	-0.00129126	0.801221	0.864306	-0.00375853	0.625922	0.762288
ENSMUSG00000016018	Skiv2l2	MTREX	23517	0	0	0	-0.00168008	0.0374456	0.0565814	-0.00568283	0.00273217	0.0127316	0.00413307	0.0467108	0.129608
ENSMUSG00000016128	Stard13	STARD13	90627	0	0	0	-0.0107922	0.000795542	0.00292825	0.00528383	0.0821908	0.153132	-0.0195997	0.00265691	0.0222747
ENSMUSG00000016181	Diexf	UTP25	27042	0	0	0	0.0128992	0.00122649	0.00382108	-0.00525819	0.182011	0.286529	0.00380083	0.499038	0.660124
ENSMUSG00000016206	H2-M3	NA	NA	0	0	0	-0.00211598	0.236512	0.288239	0.00188214	0.523023	0.635787	0.000152048	0.972302	0.986429
ENSMUSG00000016239	Lonrf3	LONRF3	79836	0	0	0	0.00704429	0.004459	0.00948512	0.000329438	0.91105	0.941501	-0.0141999	0.012651	0.0521727
ENSMUSG00000016252	Atp5e	ATP5F1E	514	0	0	0	0.00140021	0.298932	0.353978	0.00360068	0.138152	0.232113	-0.00241423	0.478808	0.64253
ENSMUSG00000016253	Nelfcd	NELFCD	51497	0	0	0	-0.0187119	8.3e-05	0.000911248	-0.00577358	0.0474677	0.099785	-0.00126317	0.736153	0.837546
ENSMUSG00000016256	Ctsz	CTSZ	1522	0	0	0	-0.00273574	0.000851923	0.00304781	0.00749817	0.00016451	0.00344688	-0.0118165	0.000141783	0.0105649
ENSMUSG00000016257	Prelid3b	PRELID3B	51012	0	0	0	0.00345079	0.00148461	0.00435925	-0.00403434	0.00611809	0.0213517	-0.00241482	0.155513	0.299085
ENSMUSG00000016262	Sertad4	SERTAD4	56256	0	0	0	-0.00550741	0.00202063	0.0053435	0.00823399	0.00344327	0.0145979	0.00996093	0.00788234	0.0390026
ENSMUSG00000016308	Ube2a	UBE2A	7319	0	0	0	-0.000250625	0.807961	0.839059	0.00154089	0.396439	0.51992	-0.000903318	0.736465	0.837657
ENSMUSG00000016319	Slc25a5	SLC25A5	292	0	0	0	0.000233536	0.398849	0.456557	-1.3e-06	0.99779	0.998409	-0.00441737	0.00108689	0.0157592
ENSMUSG00000016344	Ppdpf	PPDPF	79144	0	0	0	-0.000534677	0.716629	0.758815	0.00143413	0.575724	0.681175	-0.003048	0.434242	0.603421
ENSMUSG00000016382	Pls3	PLS3	5358	0	0	0	0.00185617	0.0142539	0.0243635	0.0135713	7.67e-05	0.00274839	-0.0137391	0.000344318	0.0123215
ENSMUSG00000016409	Nkap	NKAP	79576	0	0	0	-0.0053191	0.000667657	0.00263721	-0.00365331	0.0199252	0.0510971	-0.00701034	0.00713418	0.0369941
ENSMUSG00000016427	Ndufa1	NDUFA1	4694	0	0	0	0.000210205	0.904156	0.921556	-0.000269036	0.929502	0.953731	-9.5e-05	0.983292	0.991309
ENSMUSG00000016477	E2f3	E2F3	1871	0	1	0	-0.00698088	0.00389117	0.00858203	-0.0129075	0.00313636	0.0137682	-0.00152658	0.717163	0.82464
ENSMUSG00000016481	Cr1l	CR1L	1379	1	0	0	0.00573532	0.00341573	0.00780272	-0.0323169	5.07e-05	0.00261486	-0.00345316	0.317736	0.489812
ENSMUSG00000016487	Ppfibp1	PPFIBP1	8496	0	0	0	0.00687237	0.00021049	0.00141981	-0.00202332	0.114264	0.199631	-0.00531359	0.0161774	0.0619167
ENSMUSG00000016494	Cd34	CD34	947	0	0	0	0.00118641	0.0127889	0.0222449	-0.00344965	0.00185017	0.010017	0.00856883	0.000341783	0.0123215
ENSMUSG00000016495	Plgrkt	PLGRKT	55848	0	0	0	-0.00557955	0.00412981	0.0089649	0.00800706	0.00888811	0.0276379	-0.000353367	0.917511	0.955602
ENSMUSG00000016503	Gtf3a	GTF3A	2971	0	0	0	-0.00273356	0.0120208	0.0211404	-0.00193013	0.211476	0.322227	-0.0178412	0.000465822	0.0130286
ENSMUSG00000016510	Mtif3	MTIF3	219402	0	0	0	-0.00056025	0.705615	0.7484	-0.00497639	0.0838446	0.155636	0.00151292	0.694788	0.810644
ENSMUSG00000016520	Lnx2	LNX2	222484	0	0	0	-0.00886194	0.00201801	0.0053378	-0.00298653	0.32461	0.446608	0.00312515	0.486609	0.649466
ENSMUSG00000016526	Dyrk3	DYRK3	8444	0	0	0	0.00808414	0.00574056	0.0116357	0.00869859	0.0407316	0.0888237	0.00801968	0.168493	0.316616
ENSMUSG00000016528	Mapkapk2	MAPKAPK2	9261	0	0	0	-0.000299361	0.79043	0.823845	0.00133326	0.498378	0.614049	-0.0157337	0.00184545	0.0191927
ENSMUSG00000016534	Lamp2	LAMP2	3920	0	0	0	0.000792279	0.0864027	0.118505	0.00236943	0.0112167	0.0329869	-0.0036255	0.0102722	0.045703
ENSMUSG00000016541	Atxn10	ATXN10	25814	0	0	0	-0.0046259	0.00027535	0.00162661	-0.00976961	0.000122815	0.00307112	-0.023841	1.66e-05	0.0067496
ENSMUSG00000016552	Foxred2	FOXRED2	80020	0	0	0	-0.00408751	0.0150711	0.0255768	0.00130381	0.574768	0.680285	-0.00688512	0.0785367	0.185621
ENSMUSG00000016554	Eif3d	EIF3D	8664	0	0	0	0.00970048	3.42e-05	0.00065398	-0.0144357	6.03e-05	0.0027044	-0.00949845	0.00120315	0.016212
ENSMUSG00000016559	H3f3b	H3F3B	3021	0	1	0	0.0023839	0.00873479	0.0162379	0.00131836	0.281282	0.400109	-0.000319954	0.85662	0.917804
ENSMUSG00000016619	Nup50	NUP50	10762	0	1	0	0.00311013	0.00174126	0.00484436	0.00342831	0.00949257	0.0291217	0.00947234	0.00104572	0.0155364
ENSMUSG00000016637	Ift27	IFT27	11020	0	0	0	-0.00869934	0.00060236	0.00248665	-0.00132489	0.510975	0.624708	-0.00102243	0.733501	0.835386
ENSMUSG00000016664	Pacsin2	PACSIN2	11252	1	0	0	0.0155479	8.74e-07	0.00018653	0.000231481	0.789514	0.854983	-0.00731642	0.00157203	0.0182209
ENSMUSG00000016756	Cmah	NA	NA	0	0	0	-0.00245807	0.349755	0.407288	-0.00182094	0.680473	0.769154	0.00449208	0.502452	0.662906
ENSMUSG00000016757	Ttll12	TTLL12	23170	0	0	0	-0.00329111	0.00370524	0.00829024	0.0139235	0.000166608	0.00346728	0.00599666	0.015587	0.0604048
ENSMUSG00000016831	Tox4	TOX4	9878	0	0	0	0.00705897	0.000698864	0.00271525	0.00787411	0.00303217	0.0134606	0.0130861	0.00212937	0.0203992
ENSMUSG00000016833	Mrps18c	MRPS18C	51023	0	0	0	-0.00143412	0.0905205	0.123516	-0.00732589	0.00159851	0.00925455	0.00982395	0.00235953	0.0212042
ENSMUSG00000016918	Sulf1	SULF1	23213	0	0	0	0.00108901	0.43351	0.490636	-0.00316799	0.204097	0.31349	-0.00222208	0.534505	0.691009
ENSMUSG00000016921	Srsf6	SRSF6	6431	0	0	0	-0.00135043	0.0677538	0.0956563	-0.0124105	0.000146591	0.00321839	0.0208292	0.000101661	0.00984294
ENSMUSG00000016933	Plcg1	PLCG1	5335	0	0	0	-0.000728241	0.606967	0.658358	0.0099127	0.00497089	0.0185298	-0.00856445	0.0451343	0.12646
ENSMUSG00000016940	Kctd2	KCTD2	23510	0	0	0	-0.00402634	0.0525872	0.0763934	0.00493593	0.143602	0.23885	-0.0111255	0.042744	0.121458
ENSMUSG00000016946	Kctd5	KCTD5	54442	0	0	0	0.0237219	0.00417089	0.00903009	0.00914537	0.356818	0.481275	0.0112961	0.446423	0.615412
ENSMUSG00000016984	Etaa1	ETAA1	54465	0	0	0	-0.0108857	0.00129292	0.00395985	-0.00488523	0.152614	0.250524	0.00170968	0.719572	0.825998
ENSMUSG00000017009	Sdc4	SDC4	6385	0	0	0	-0.00315766	0.00156879	0.0045271	0.00803671	0.000422203	0.00498452	-0.0139863	0.000258392	0.0119222
ENSMUSG00000017057	Il13ra1	IL13RA1	3597	0	0	0	-0.0192502	3.41e-05	0.000653441	0.00756015	0.00740857	0.0243057	-0.0268809	0.000362937	0.0123215
ENSMUSG00000017119	Nbr1	NBR1	4077	0	0	0	0.00374443	0.00416468	0.00902519	0.00512929	0.0108765	0.0322102	0.020253	0.000348252	0.0123215
ENSMUSG00000017132	Cyth1	CYTH1	9267	0	0	0	0.00795093	0.00896582	0.0165621	-0.00278809	0.486122	0.602926	0.0141343	0.04286	0.121667
ENSMUSG00000017144	Rnd3	RND3	390	0	0	0	0.0032915	0.00284694	0.00682645	-0.00238293	0.0805878	0.151216	0.00881543	0.00261976	0.0221106
ENSMUSG00000017146	Brca1	BRCA1	672	0	1	0	-0.0110233	0.00135865	0.00409268	0.00705475	0.0594073	0.118815	0.0191575	0.00571014	0.0326033
ENSMUSG00000017176	Nt5c3b	NT5C3B	115024	0	0	0	-0.00529594	0.00253287	0.00627866	-0.00100146	0.597045	0.700245	-0.00259318	0.372256	0.544178
ENSMUSG00000017188	Coa3	COA3	28958	0	0	0	-0.00680116	0.00281547	0.00677799	-0.00763993	0.0158635	0.0427857	-0.0134501	0.00810245	0.0396798
ENSMUSG00000017210	Med24	MED24	9862	0	0	0	-0.00782602	0.000638287	0.00257748	-0.000224348	0.902738	0.935619	0.00115	0.675844	0.797571
ENSMUSG00000017221	Psmd3	PSMD3	5709	0	1	0	0.0195264	0.0447547	0.0662175	-0.00552336	0.703535	0.788754	-0.0164777	0.455595	0.623016
ENSMUSG00000017264	Exosc10	EXOSC10	5394	0	0	0	0.00195441	0.00783199	0.0148415	-0.00935394	0.000217133	0.003845	-0.00206864	0.173749	0.323709
ENSMUSG00000017286	Glod4	GLOD4	51031	0	0	0	-0.0127736	0.000564948	0.00239548	-0.00651659	0.051414	0.106108	-0.0331183	0.000567308	0.0137648
ENSMUSG00000017288	Vps53	VPS53	55275	0	0	0	-0.00490082	0.00166984	0.00470732	-0.00442531	0.0207322	0.052659	0.002785	0.251966	0.418784
ENSMUSG00000017291	Taok1	TAOK1	57551	0	1	0	-0.00511934	0.00127054	0.00391543	-0.00168365	0.27389	0.392251	-0.00036166	0.870765	0.926311
ENSMUSG00000017299	Dnttip1	DNTTIP1	116092	0	0	0	-0.00175569	0.331088	0.387999	0.00463843	0.153735	0.251931	-0.00095612	0.832726	0.901779
ENSMUSG00000017307	Acot8	ACOT8	10005	0	0	0	0.00455323	0.0178499	0.029539	0.00238918	0.381588	0.505527	0.00335737	0.413933	0.585195
ENSMUSG00000017314	Mpp2	MPP2	4355	0	0	0	-0.0108203	0.00178173	0.00492105	0.00784138	0.0514982	0.106189	0.00200195	0.701132	0.814971
ENSMUSG00000017376	Nlk	NLK	51701	0	0	0	-0.00724745	0.0178559	0.0295445	-0.00889615	0.0673005	0.131273	0.00537839	0.411102	0.582632
ENSMUSG00000017386	Traf4	TRAF4	9618	0	0	0	0.00180861	0.676369	0.721864	0.00148022	0.843708	0.894451	-0.0161403	0.180396	0.332538
ENSMUSG00000017400	Stac2	STAC2	342667	0	0	0	0.0180286	5.83e-05	0.00079987	0.0125245	0.00150673	0.00893572	0.00673929	0.0721315	0.17479
ENSMUSG00000017404	Rpl19	RPL19	6143	0	0	0	0.00706486	8.82e-05	0.000945649	-0.0031166	0.0122784	0.0353157	-0.000476043	0.740813	0.839553
ENSMUSG00000017405	Nek8	NEK8	284086	0	0	0	-0.0154047	0.000226923	0.00147082	-0.00395409	0.167419	0.268584	-0.00420966	0.311943	0.484407
ENSMUSG00000017418	Arl5b	ARL5B	221079	0	0	0	0.00846091	0.000789948	0.0029146	0.00438383	0.0686099	0.133259	-0.000213659	0.946202	0.971762
ENSMUSG00000017421	Zfp207	ZNF207	7756	0	0	0	-0.0189846	3.5e-06	0.000271226	-0.0194567	4.49e-05	0.0025135	0.0140865	0.000684353	0.0140054
ENSMUSG00000017428	Psmd11	PSMD11	5717	0	1	0	-3.09e-05	0.969355	0.974723	-0.00269128	0.0852745	0.157701	0.00322351	0.155025	0.298666
ENSMUSG00000017446	C1qtnf1	C1QTNF1	114897	0	0	0	-0.00515301	0.00395385	0.00868067	0.00674859	0.012383	0.0355355	0.00306739	0.340854	0.514316
ENSMUSG00000017466	Timp2	TIMP2	7077	0	0	0	-0.00235992	0.102315	0.137593	0.0109698	0.00255638	0.0121601	-0.0138426	0.00480621	0.0296884
ENSMUSG00000017478	Zc3h18	ZC3H18	124245	1	0	0	0.00898312	0.000537937	0.00233548	0.000968422	0.629	0.727065	-0.00112499	0.707718	0.818505
ENSMUSG00000017485	Top2b	TOP2B	7155	0	0	0	-0.0061345	0.00295472	0.00701723	-0.00915792	0.00524021	0.0192511	0.00200787	0.561118	0.712689
ENSMUSG00000017493	Igfbp4	IGFBP4	3487	0	0	0	0.00215886	0.291212	0.345875	-0.0207134	0.00119187	0.00788562	-0.00538457	0.308171	0.480322
ENSMUSG00000017499	Cdc6	CDC6	990	0	1	0	-0.0180726	0.000127972	0.00111841	-0.00640541	0.0432918	0.0929887	0.0230575	0.00151906	0.0177559
ENSMUSG00000017548	Suz12	SUZ12	23512	0	0	0	-0.00527729	0.0080014	0.0151074	-0.003889	0.15754	0.256185	-0.000410368	0.914725	0.953829
ENSMUSG00000017550	Atad5	ATAD5	79915	0	0	0	-0.0120755	0.000166259	0.00127595	0.0011058	0.567461	0.674468	0.00942311	0.0119558	0.0501739
ENSMUSG00000017561	Crlf3	CRLF3	51379	0	0	0	-0.00463162	0.271191	0.325133	-0.00855708	0.239263	0.354143	-0.00868221	0.415038	0.585707
ENSMUSG00000017615	Tnfaip1	TNFAIP1	7126	0	0	0	0.00785685	2.83e-05	0.000602662	-0.00565162	0.000748427	0.00633358	0.00171815	0.185266	0.339437
ENSMUSG00000017631	Abr	ABR	29	0	0	0	-0.00504679	0.0350844	0.0534227	0.0116957	0.0110644	0.0326457	-0.0138599	0.0289082	0.0923513
ENSMUSG00000017664	Slc35c2	SLC35C2	51006	0	0	0	0.00913799	0.000474738	0.00217588	-0.00375329	0.0868188	0.159988	-0.00238002	0.427138	0.596974
ENSMUSG00000017667	Zfp334	ZNF334	55713	0	0	0	0.00596922	0.0143475	0.0244941	0.00206147	0.539306	0.650328	0.0177867	0.00844746	0.0406702
ENSMUSG00000017670	Elmo2	ELMO2	63916	0	0	0	-0.0107497	0.000176486	0.00131019	-2.28e-05	0.989542	0.993624	0.00624772	0.0415896	0.119261
ENSMUSG00000017677	Wsb1	WSB1	26118	0	0	0	0.00104118	0.210129	0.260527	-0.00460256	0.0100589	0.0304509	-0.00363301	0.105448	0.22899
ENSMUSG00000017679	Ttpal	TTPAL	79183	0	0	0	-0.00146723	0.323675	0.380169	-0.00279203	0.27768	0.39629	0.000731075	0.844189	0.909285
ENSMUSG00000017686	Rhot1	RHOT1	55288	0	0	0	0.0153002	0.00599607	0.01203	-0.00189813	0.783755	0.850517	-0.0145597	0.188592	0.34344
ENSMUSG00000017697	Ada	ADA	100	0	0	0	-0.00956195	0.00371696	0.00830508	0.0038316	0.325323	0.447265	-0.000593887	0.916763	0.955127
ENSMUSG00000017707	Serinc3	SERINC3	10955	0	0	0	0.00390919	0.00969056	0.017681	-0.00235039	0.256261	0.372506	-0.000553603	0.852591	0.9158
ENSMUSG00000017713	Tha1	NA	NA	0	0	0	0.00107642	0.405355	0.462892	-0.00372833	0.119588	0.207066	0.000366049	0.911038	0.951198
ENSMUSG00000017715	Pgs1	PGS1	9489	0	0	0	0.0114034	0.0104848	0.0188981	0.00658775	0.281798	0.400568	0.00607021	0.499206	0.660222
ENSMUSG00000017716	Birc5	BIRC5	332	0	1	0	-0.00643409	6.64e-06	0.000305067	0.00034311	0.495807	0.611803	0.00530642	0.000736538	0.0140929
ENSMUSG00000017718	Afmid	AFMID	125061	0	0	0	-0.00608893	0.0131371	0.0227296	0.00260758	0.43953	0.559624	-0.00847282	0.122689	0.254222
ENSMUSG00000017721	Pigt	PIGT	51604	0	0	0	0.000118873	0.861922	0.885451	0.00151402	0.224004	0.337141	-0.00511485	0.0202406	0.0720613
ENSMUSG00000017724	Etv4	ETV4	2118	0	0	0	-0.0100724	0.000833042	0.00301201	-0.00105722	0.680595	0.769216	-0.00857098	0.0535776	0.141489
ENSMUSG00000017734	Dbndd2	DBNDD2	55861	0	0	0	0.00301263	0.00463706	0.00979649	-0.0016146	0.226067	0.339442	-0.00447258	0.0447489	0.125868
ENSMUSG00000017747	Ghdc	GHDC	84514	0	0	0	-0.00747483	0.00126722	0.00390965	0.0017504	0.425023	0.546199	-0.000775035	0.811221	0.887082
ENSMUSG00000017754	Pltp	PLTP	5360	0	0	0	0.00469746	0.00309554	0.00726123	0.0116999	0.00091792	0.00699601	-0.00345709	0.219746	0.382798
ENSMUSG00000017756	Slc12a7	SLC12A7	10723	0	0	0	-0.00462759	0.0296916	0.0461323	0.00601433	0.0825142	0.153615	-0.0159046	0.00968094	0.0440111
ENSMUSG00000017760	Ctsa	CTSA	5476	0	0	0	0.00350521	0.00248435	0.00619194	0.0136651	0.000146853	0.00321839	-0.00632353	0.0101845	0.0455029
ENSMUSG00000017764	Zswim1	ZSWIM1	90204	0	0	0	0.00411715	0.00466005	0.00983779	0.00194541	0.279955	0.398862	0.0159722	0.00118811	0.0162002
ENSMUSG00000017765	Slc12a4	SLC12A4	6560	0	0	0	0.0064008	0.00110306	0.00357783	-0.002176	0.24102	0.356098	-0.00996319	0.00687517	0.0362619
ENSMUSG00000017774	Myo1c	MYO1C	4641	0	0	0	-0.00436779	0.000326224	0.00177714	-0.00077712	0.364348	0.48876	-0.0101361	0.000475962	0.0130286
ENSMUSG00000017776	Crk	CRK	1398	0	0	0	-0.00128652	0.422617	0.480304	-0.00286275	0.306815	0.426899	0.0126595	0.0147729	0.05828
ENSMUSG00000017778	Cox7c	COX7C	1350	0	0	0	-0.00116712	0.362074	0.419711	-0.000928757	0.667074	0.759109	0.0031878	0.338873	0.512453
ENSMUSG00000017781	Pitpna	PITPNA	5306	0	0	0	-0.00364428	0.0725436	0.101678	-0.00499814	0.137646	0.231467	0.00284302	0.545346	0.699883
ENSMUSG00000017801	Mlx	MLX	6945	0	0	0	0.00397578	0.00281897	0.00678213	0.00425924	0.0193969	0.049989	-0.00122854	0.577706	0.726339
ENSMUSG00000017802	Retreg3	RETREG3	162427	0	0	0	0.000536846	0.874942	0.896653	-0.00771993	0.215169	0.326854	-0.00413172	0.642674	0.774812
ENSMUSG00000017817	Jph2	JPH2	57158	0	0	0	0.0152496	0.000561101	0.00239092	0.0253173	0.000626573	0.00589647	-0.0144868	0.0221582	0.0765831
ENSMUSG00000017831	Rab5a	RAB5A	5868	0	0	0	0.00562772	0.00439388	0.00938324	0.00591783	0.0340839	0.0771813	0.0127969	0.00760087	0.0382889
ENSMUSG00000017837	Nkiras2	NKIRAS2	28511	0	0	0	0.00494183	0.00118077	0.00373149	-0.00510942	0.00763444	0.0248049	-0.00363299	0.116599	0.245315
ENSMUSG00000017843	Ppp2r5c	PPP2R5C	5527	0	1	0	-0.00379437	0.000666958	0.00263649	-0.00310658	0.00952386	0.0291943	-0.00531647	0.00558663	0.0322457
ENSMUSG00000017858	Ift52	IFT52	51098	0	0	0	-0.000133925	0.921685	0.935657	-0.00656738	0.023617	0.0582657	-0.00224264	0.531277	0.68847
ENSMUSG00000017861	Mybl2	MYBL2	4605	0	1	0	-0.00436291	0.00601975	0.0120712	0.00333503	0.121468	0.209656	0.0112049	0.00650691	0.0350169
ENSMUSG00000017929	B4galt5	B4GALT5	9334	0	0	0	-0.00440161	0.0472246	0.0693963	0.0241583	0.000647815	0.00599111	-0.0152827	0.0152944	0.0595737
ENSMUSG00000017943	Gdap1l1	GDAP1L1	78997	0	0	0	0.00279816	0.0102102	0.0184789	-0.0142161	0.000221766	0.003845	-0.00323899	0.164893	0.311592
ENSMUSG00000017969	Ptgis	PTGIS	5740	0	0	0	-0.00613362	0.00096049	0.003265	0.0145906	0.000316608	0.0045193	0.00171901	0.488137	0.650698
ENSMUSG00000017999	Ddx27	DDX27	55661	0	0	0	0.0100578	9.88e-06	0.000375506	-0.00820355	0.000218706	0.003845	-0.0121571	0.000237937	0.0116398
ENSMUSG00000018001	Cyth3	CYTH3	9265	0	0	0	-0.0120713	9.64e-05	0.000988186	0.00466976	0.0232316	0.057476	-0.018339	0.000665997	0.0139109
ENSMUSG00000018040	Rrp7a	RRP7A	27341	0	0	0	0.00394925	0.000907517	0.00315946	0.00351618	0.0100807	0.0304798	0.0132971	0.000380332	0.0126116
ENSMUSG00000018042	Cyb5r3	CYB5R3	1727	0	0	0	-0.00122834	0.0542926	0.0786206	0.00687309	0.000693794	0.00612896	-0.00170186	0.260171	0.427454
ENSMUSG00000018068	Ints2	INTS2	57508	0	0	0	-0.00389921	0.000693619	0.00270542	-0.00319934	0.00989729	0.030073	0.00291948	0.0674358	0.166408
ENSMUSG00000018076	Med13l	MED13L	23389	0	0	0	0.0088526	0.000308916	0.0017239	-0.00327761	0.0818599	0.152745	-0.00371222	0.170288	0.319255
ENSMUSG00000018102	Hist1h2bc	HIST1H2BC	8347	0	1	0	0.00236391	0.138315	0.179626	0.00566191	0.0529209	0.108303	0.0107542	0.0213704	0.0747408
ENSMUSG00000018143	Mafk	MAFK	7975	0	0	0	0.0298561	6.03e-06	0.000301237	0.00757383	0.0105969	0.0316195	7.91e-05	0.981276	0.989929
ENSMUSG00000018160	Med1	MED1	5469	0	0	0	0.00720473	0.000375437	0.00190974	0.00405703	0.0226365	0.0564677	-0.00715338	0.01144	0.0488801
ENSMUSG00000018167	Stard3	STARD3	10948	0	0	0	-0.00451503	0.0173938	0.0289012	0.00686098	0.0309105	0.0714809	-0.0015007	0.705435	0.817406
ENSMUSG00000018171	Vmp1	VMP1	81671	0	0	0	0.00543274	0.000281206	0.00164132	-0.00853203	0.000374913	0.00477864	0.00374002	0.0356922	0.106834
ENSMUSG00000018189	Uchl5	UCHL5	51377	0	0	0	-0.00421469	0.00243479	0.00609363	-0.00572582	0.00607954	0.0212561	-0.00632267	0.0212704	0.0745159
ENSMUSG00000018196	Glrx2	GLRX2	51022	0	0	0	0.00314718	0.189453	0.23749	-0.00300637	0.44288	0.563012	0.000252536	0.965203	0.98229
ENSMUSG00000018199	Trove2	TROVE2	6738	0	0	0	-0.0062801	0.000120542	0.00108327	0.0033707	0.00772002	0.0250255	0.00832245	0.00128409	0.0167122
ENSMUSG00000018209	Stk4	STK4	6789	0	0	0	-0.00304931	0.0411425	0.0614612	-0.00332099	0.161498	0.261284	-0.00902218	0.0253346	0.0840609
ENSMUSG00000018217	Pmp22	PMP22	5376	0	0	0	-0.0174441	6.56e-06	0.000305067	-0.00297129	0.0557812	0.112925	-0.00799102	0.00550848	0.031961
ENSMUSG00000018239	Zcchc10	ZCCHC10	54819	0	0	0	0.00698237	0.00130516	0.00398266	0.000312064	0.878874	0.919798	0.0102389	0.010824	0.0473522
ENSMUSG00000018286	Psmb6	PSMB6	5694	0	1	0	0.00282984	0.000636276	0.00257496	-0.00133777	0.0736954	0.141171	0.0068886	0.000782605	0.0143344
ENSMUSG00000018287	Spag7	SPAG7	9552	0	0	0	0.0038827	0.00300131	0.00710281	0.00738723	0.00219283	0.0110755	-0.00859309	0.00556565	0.0321733
ENSMUSG00000018293	Pfn1	PFN1	5216	0	0	0	0.00164301	0.00118566	0.0037387	-0.00218005	0.00296923	0.0132955	0.0032193	0.00315052	0.0239482
ENSMUSG00000018322	Tomm34	TOMM34	10953	0	0	0	-0.00898457	0.000351748	0.00183409	-0.00833432	0.00288392	0.0131309	-0.00526732	0.0786241	0.185675
ENSMUSG00000018326	Ywhab	YWHAB	7529	0	1	0	-0.00226012	0.0554519	0.0800366	-0.0137589	0.000528147	0.00548142	0.000186035	0.944261	0.970823
ENSMUSG00000018339	Gpx3	GPX3	2878	0	0	0	0.000268087	0.855429	0.880362	0.00307677	0.24789	0.36319	-0.00893162	0.04565	0.127592
ENSMUSG00000018340	Anxa6	ANXA6	309	0	0	0	-0.00326722	6.57e-05	0.000836581	0.00332034	0.000459441	0.00518855	0.0044801	0.000679108	0.0139731
ENSMUSG00000018347	Zkscan6	ZNF18	7566	0	0	0	0.00178222	0.226844	0.278371	0.000133025	0.956125	0.972163	-0.00045955	0.898603	0.944334
ENSMUSG00000018362	Kpna2	KPNA2	3838	0	0	0	-0.00964728	0.000801748	0.00294446	-0.0152428	0.00108138	0.00751701	-0.00609148	0.126492	0.259796
ENSMUSG00000018363	Smurf2	SMURF2	64750	0	0	0	0.00241201	0.133965	0.174691	0.00601341	0.043949	0.0940295	-0.014493	0.00647876	0.034967
ENSMUSG00000018372	Cep95	CEP95	90799	0	0	0	-0.000661996	0.658737	0.705878	-0.00704684	0.0256626	0.0620677	0.000308091	0.936615	0.965391
ENSMUSG00000018377	Vezf1	VEZF1	7716	0	0	0	0.0101251	0.00547491	0.0112025	0.00552526	0.236558	0.351093	0.000602806	0.928055	0.961158
ENSMUSG00000018378	Cuedc1	CUEDC1	404093	0	0	0	0.00759557	0.0138773	0.023813	-0.000737151	0.861522	0.906615	-0.00186995	0.767247	0.857899
ENSMUSG00000018379	Srsf1	SRSF1	6426	1	0	0	-0.00179742	0.16615	0.21136	-0.0200185	0.000240997	0.00397263	0.0143921	0.00310953	0.0238106
ENSMUSG00000018387	Shroom1	SHROOM1	134549	0	0	0	-0.00314679	0.146161	0.188914	0.00627958	0.0995808	0.178299	0.014106	0.0248821	0.0831098
ENSMUSG00000018395	Kif3a	KIF3A	11127	0	0	0	0.00649776	0.000710227	0.0027403	0.00580109	0.00722631	0.0239343	0.00301448	0.226191	0.390173
ENSMUSG00000018398	Sept8	SEPT8	23176	0	0	0	0.0197476	0.000498864	0.00224156	-0.00965098	0.0525352	0.107747	0.00154284	0.810701	0.886986
ENSMUSG00000018401	Mtmr4	MTMR4	9110	0	0	0	-0.00972555	0.0097896	0.0178276	0.00441839	0.381556	0.505527	-0.00616228	0.417224	0.588011
ENSMUSG00000018405	Mrm1	MRM1	79922	0	0	0	-0.000535981	0.687089	0.731803	-0.00890632	0.00600393	0.0210755	-0.00498059	0.178739	0.330176
ENSMUSG00000018412	Kansl1	KANSL1	284058	0	0	0	0.000381276	0.795488	0.828061	0.00648977	0.0334056	0.0760215	0.00991451	0.0307513	0.0962767
ENSMUSG00000018415	Gid4	GID4	79018	0	0	0	0.00216219	0.00352229	0.0079887	-0.00644319	0.000555944	0.00560847	-0.0141545	0.000145979	0.0107051
ENSMUSG00000018417	Myo1b	MYO1B	4430	0	0	0	-0.0052791	0.000620192	0.00253338	-0.0192226	3.74e-05	0.00243542	-0.0165688	0.000318357	0.0121839
ENSMUSG00000018425	Dhx40	DHX40	79665	0	0	0	-0.00488469	0.0018299	0.00501293	-0.00289412	0.0985819	0.176906	-0.0022227	0.36194	0.534063
ENSMUSG00000018428	Akap1	AKAP1	8165	0	0	0	0.00962138	0.00604091	0.012103	0.00801281	0.096889	0.17458	0.00591442	0.376889	0.548761
ENSMUSG00000018433	Nol11	NOL11	25926	0	0	0	-0.000353357	0.531155	0.586526	-0.00745035	0.000536364	0.00551799	-0.0197724	6.7e-05	0.00893916
ENSMUSG00000018442	Derl2	DERL2	51009	0	0	0	-0.00212275	0.0961324	0.130226	0.000123716	0.950415	0.968619	0.0100983	0.0101547	0.0454677
ENSMUSG00000018446	C1qbp	C1QBP	708	0	0	0	0.0123646	1.8e-05	0.000497391	-0.00761542	0.000903934	0.006929	0.000704179	0.683391	0.8027
ENSMUSG00000018449	Rpain	RPAIN	84268	0	0	0	-0.00799072	8.72e-05	0.000941102	0.00209027	0.0845879	0.156685	0.00972038	0.00127701	0.0166579
ENSMUSG00000018470	Kcnab3	KCNAB3	9196	0	0	0	-0.00906145	0.00294528	0.00700208	0.00371179	0.286905	0.406112	-0.0041064	0.425984	0.595899
ENSMUSG00000018474	Chd3	CHD3	1107	0	0	0	-0.00445969	0.00175385	0.00486424	0.0213345	4.55e-05	0.0025135	-0.00652096	0.0158473	0.0611031
ENSMUSG00000018476	Kdm6b	KDM6B	23135	1	0	0	0.0239031	8.3e-06	0.000342787	-0.00467096	0.0405468	0.0885051	-0.00650887	0.0524225	0.139388
ENSMUSG00000018481	Appbp2	APPBP2	10513	0	0	0	0.000304515	0.84343	0.870598	-0.000227679	0.932404	0.955712	0.0077372	0.0856339	0.196994
ENSMUSG00000018500	Adora2b	ADORA2B	136	0	0	0	-0.00556121	0.0161009	0.0270595	-0.00291635	0.370771	0.495169	-0.0056245	0.262953	0.430362
ENSMUSG00000018501	Ncor1	NCOR1	9611	0	0	0	0.00221945	0.0785419	0.108938	0.00302627	0.147998	0.244354	0.00452257	0.151355	0.294284
ENSMUSG00000018507	Trpv2	TRPV2	51393	0	0	0	0.00745216	0.00861241	0.0160727	0.0100411	0.0254562	0.0616597	-0.00560143	0.326861	0.499104
ENSMUSG00000018509	Cenpv	CENPV	201161	0	0	0	-0.00368169	0.0869886	0.119194	0.00132389	0.691048	0.778262	0.00549678	0.289739	0.45877
ENSMUSG00000018537	Pcgf2	PCGF2	7703	0	0	0	-0.00546968	0.00982063	0.0178699	0.00235694	0.405637	0.528951	0.000195983	0.962557	0.981035
ENSMUSG00000018541	Cwc25	CWC25	54883	0	0	0	0.0113599	0.000102972	0.00101715	0.00657285	0.00477561	0.0180307	0.00912328	0.00645402	0.0349427
ENSMUSG00000018547	Pip4k2b	PIP4K2B	8396	0	0	0	-0.00270858	0.0588831	0.0844774	-0.00574935	0.0284633	0.0669724	0.00713039	0.0568691	0.147625
ENSMUSG00000018548	Trim37	TRIM37	4591	0	0	0	0.000908568	0.756967	0.793958	-0.00196746	0.699737	0.785728	-0.0071446	0.362769	0.534873
ENSMUSG00000018559	Ctdnep1	CTDNEP1	23399	0	1	0	-0.00048372	0.59658	0.649308	0.00173084	0.287365	0.406562	-0.00301084	0.227717	0.391838
ENSMUSG00000018565	Elp5	ELP5	23587	0	0	0	0.00656638	0.000636538	0.00257496	-0.00467383	0.0161193	0.0433282	0.0125979	0.00173007	0.0186199
ENSMUSG00000018567	Gabarap	GABARAP	11337	0	0	0	0.00350947	0.000563549	0.00239398	0.0112678	5.47e-05	0.0026857	0.0044021	0.00713059	0.0369941
ENSMUSG00000018570	2810408A11Rik	NA	NA	1	0	0	-0.00394658	0.054299	0.0786206	-0.00166895	0.590383	0.694425	0.00209451	0.652097	0.781241
ENSMUSG00000018572	Phf23	PHF23	79142	0	0	0	0.00925379	4.82e-05	0.000718915	0.0117636	0.000158042	0.00335621	0.00791113	0.00263051	0.0221598
ENSMUSG00000018574	Acadvl	ACADVL	37	0	0	0	-0.00270751	0.0138637	0.0237987	0.00243096	0.13568	0.228966	-0.00468659	0.0675627	0.166613
ENSMUSG00000018583	G3bp1	G3BP1	10146	0	0	0	0.00468546	0.000658654	0.00262065	0.000119411	0.914274	0.943469	0.000419381	0.800277	0.880852
ENSMUSG00000018585	Atox1	ATOX1	475	0	0	0	-0.00216549	0.070683	0.0993505	0.00329059	0.103694	0.184317	-0.000993829	0.717673	0.824813
ENSMUSG00000018593	Sparc	SPARC	6678	0	0	0	7.07e-05	0.879863	0.900627	0.00689529	0.000379895	0.0047854	0.00135728	0.284695	0.453414
ENSMUSG00000018599	Mief2	MIEF2	125170	0	0	0	-0.000635064	0.67409	0.720037	-0.0020102	0.446472	0.565901	0.0126012	0.0126927	0.0522424
ENSMUSG00000018604	Tbx3	TBX3	6926	0	0	0	-0.0116265	0.000614598	0.00252098	0.00537324	0.0765156	0.145339	-0.0060951	0.161438	0.30704
ENSMUSG00000018648	Dusp14	DUSP14	11072	0	0	0	0.0038064	0.0105115	0.0189403	0.00288658	0.171422	0.273511	0.016655	0.00158427	0.0183071
ENSMUSG00000018651	Tada2a	TADA2A	6871	0	0	0	0.00481115	0.00866652	0.01615	-0.00210876	0.384168	0.50761	-0.00598494	0.126251	0.259487
ENSMUSG00000018659	Pnpo	PNPO	55163	0	0	0	0.00141249	0.279535	0.333704	-0.00458907	0.0633967	0.125239	0.00572181	0.110331	0.236099
ENSMUSG00000018661	Cog1	COG1	9382	0	0	0	-0.00122504	0.155157	0.199191	0.000337388	0.806457	0.868399	0.00141958	0.496555	0.658256
ENSMUSG00000018666	Cbx1	CBX1	10951	0	0	0	-0.00523152	0.00209851	0.00548355	-0.00609909	0.00950857	0.029163	0.000487599	0.853701	0.916427
ENSMUSG00000018669	Cdk5rap3	CDK5RAP3	80279	0	0	0	-0.00413594	0.00774327	0.0147123	-0.00221957	0.2813	0.400109	-0.00125721	0.674344	0.79631
ENSMUSG00000018672	Copz2	COPZ2	51226	0	0	0	0.00342012	0.0654731	0.0928259	0.0026315	0.361405	0.485763	-0.00187517	0.659052	0.785707
ENSMUSG00000018677	Slc25a39	SLC25A39	51629	1	0	0	0.0148542	8.57e-06	0.000345214	-0.0121173	0.00020778	0.00380321	-0.00441085	0.0387694	0.113086
ENSMUSG00000018678	Sp2	SP2	6668	0	0	0	0.00146485	0.452448	0.509701	0.00854706	0.0318519	0.0731682	0.000775311	0.876051	0.929893
ENSMUSG00000018697	Aatf	AATF	26574	0	0	0	0.0158825	5.56e-05	0.000786235	-0.0127243	0.000908042	0.00694385	-0.00118398	0.681852	0.801623
ENSMUSG00000018707	Dync1h1	DYNC1H1	1778	0	1	0	0.0136592	0.000129108	0.00112471	0.0039566	0.0843245	0.156355	-0.00443045	0.178335	0.329716
ENSMUSG00000018733	Pex12	PEX12	5193	0	0	0	0.00342125	0.0237038	0.0377729	-0.00484827	0.0524017	0.107587	0.00277351	0.402153	0.57436
ENSMUSG00000018736	Ndel1	NDEL1	81565	0	1	0	0.0130054	8.14e-05	0.000901936	0.00548209	0.0136095	0.0380761	-0.00410396	0.14527	0.285351
ENSMUSG00000018740	Slc25a35	SLC25A35	399512	0	0	0	-0.00892272	0.00053715	0.00233511	-0.00525972	0.0284128	0.0668813	-0.000988272	0.739875	0.83895
ENSMUSG00000018750	Zbtb4	ZBTB4	57659	0	0	0	-0.00599506	0.0123096	0.0215786	0.000872576	0.787616	0.853493	0.00293977	0.547863	0.701822
ENSMUSG00000018761	Mpdu1	MPDU1	9526	0	0	0	-0.000561675	0.625915	0.675707	0.0145468	0.000641259	0.00595057	-0.00561099	0.0921094	0.207928
ENSMUSG00000018765	Fxr2	FXR2	9513	0	0	0	0.00348772	0.0189	0.0310432	-0.00584984	0.0226226	0.0564456	-0.00164683	0.600301	0.743914
ENSMUSG00000018770	Atp5g3	ATP5MC3	518	0	0	0	-0.00619064	0.000264073	0.00159335	-0.000546263	0.626494	0.724753	0.00363726	0.0590551	0.151444
ENSMUSG00000018774	Cd68	CD68	968	0	0	0	0.0104442	0.000226224	0.00146962	0.0224251	9.59e-05	0.00294429	-0.0106379	0.00575253	0.0327408
ENSMUSG00000018796	Acsl1	ACSL1	2180	0	0	0	0.00505091	0.00304677	0.00717916	-0.0145571	0.000543619	0.00554861	-0.0028386	0.334253	0.507733
ENSMUSG00000018800	Abca5	ABCA5	23461	0	0	0	0.00847161	0.00508523	0.0105485	0.00724064	0.0790668	0.149065	-0.00495407	0.379255	0.550873
ENSMUSG00000018809	Smyd4	SMYD4	114826	0	0	0	-0.0112717	0.000602535	0.00248665	-0.00218269	0.406885	0.530095	-0.00545954	0.189259	0.344023
ENSMUSG00000018819	Lsp1	LSP1	4046	0	0	0	0.0142825	0.000250787	0.00155755	0.0174778	0.000802797	0.00657041	-0.00769662	0.0749147	0.179434
ENSMUSG00000018820	Zfyve27	ZFYVE27	118813	0	0	0	0.00531496	0.0145806	0.0248513	-0.00877041	0.018738	0.0486154	-0.00971522	0.0587485	0.150894
ENSMUSG00000018821	Avpi1	AVPI1	60370	0	0	0	0.0126068	1.6e-05	0.000479162	-0.00549388	0.00270455	0.0126574	0.00205925	0.253855	0.420884
ENSMUSG00000018841	Rad51d	RAD51D	5892	0	0	0	-0.00824908	0.0011167	0.00360978	0.00214734	0.360174	0.484819	-0.00952126	0.0238694	0.0806528
ENSMUSG00000018846	Pank3	PANK3	79646	0	0	0	-0.00267794	0.0229048	0.0366934	0.000973925	0.562978	0.671267	-0.00230996	0.370748	0.542719
ENSMUSG00000018848	Rars	RARS	5917	0	0	0	0.0184616	4.72e-06	0.000286596	-0.0256521	1.5e-05	0.00213819	-0.00321647	0.138686	0.276022
ENSMUSG00000018849	Wwc1	WWC1	23286	0	0	0	0.00368493	0.0162518	0.0272929	0.0244549	0.000123864	0.00307112	-0.0116415	0.00753252	0.0381273
ENSMUSG00000018858	Mrpl58	MRPL58	3396	0	0	0	0.00457391	0.00629126	0.0124756	1.37e-05	0.994772	0.996483	-0.00488476	0.150384	0.292932
ENSMUSG00000018861	Fdxr	FDXR	2232	0	0	0	0.00977892	0.000534353	0.00232965	0.0011258	0.605329	0.707278	0.0098998	0.0160512	0.0615988
ENSMUSG00000018882	Mrpl45	MRPL45	84311	0	0	0	0.000440475	0.60274	0.655015	0.00665117	0.00322989	0.0139928	-0.00321761	0.171472	0.320843
ENSMUSG00000018899	Irf1	IRF1	3659	0	0	0	-0.0166562	0.000177622	0.00131266	-0.0030525	0.275285	0.393855	0.0184128	0.00327911	0.0244863
ENSMUSG00000018900	Slc22a5	SLC22A5	6584	0	0	0	0.000988221	0.48708	0.543205	-0.0024839	0.319497	0.441111	0.00128083	0.725428	0.829871
ENSMUSG00000018906	P4ha2	P4HA2	8974	0	0	0	-0.00764487	0.000944056	0.0032316	0.0126544	0.00109851	0.00756799	0.00323188	0.305131	0.476871
ENSMUSG00000018909	Arrb1	ARRB1	408	0	0	0	-0.0195239	0.000103584	0.00101715	0.00961656	0.00915717	0.0283268	0.00713244	0.117239	0.24641
ENSMUSG00000018921	Pelp1	PELP1	27043	0	0	0	0.00181716	0.0672115	0.0949494	0.00782362	0.00207019	0.010655	0.00689397	0.0161201	0.0617389
ENSMUSG00000018923	Med11	MED11	400569	0	0	0	0.00988262	0.00070507	0.0027266	0.011062	0.00302684	0.0134526	0.00765222	0.061402	0.155372
ENSMUSG00000018930	Ccl4	CCL4	6351	0	0	0	0.0136109	0.000976661	0.00330954	0.0243184	0.000877535	0.00686962	-0.0163988	0.0168363	0.0635247
ENSMUSG00000018931	Natd1	NATD1	256302	0	0	0	0.00439931	0.00661294	0.0129563	0.00738113	0.0077771	0.0251399	0.0104587	0.00978392	0.0443918
ENSMUSG00000018932	Map2k3	MAP2K3	5606	0	0	0	-0.00585596	0.000204983	0.00140084	0.00875626	0.000326224	0.00455122	-0.00981051	0.000917395	0.0149289
ENSMUSG00000018965	Ywhah	YWHAH	7533	0	1	0	0.00193191	0.360145	0.417687	0.00206978	0.561724	0.67043	0.0115845	0.058238	0.150021
ENSMUSG00000018974	Sart3	SART3	9733	0	0	0	0.000877461	0.560371	0.615284	0.000214817	0.934137	0.956716	-0.00739084	0.0891858	0.202916
ENSMUSG00000018983	E2f2	E2F2	1870	0	1	0	-0.0173091	0.000562675	0.00239294	-0.00153558	0.69472	0.781859	0.00949349	0.137007	0.273681
ENSMUSG00000018995	Nars2	NARS2	79731	0	0	0	0.00940882	0.0018507	0.0050566	-0.0170458	0.00160428	0.00927387	0.0011467	0.802287	0.881668
ENSMUSG00000018999	Slc35b4	SLC35B4	84912	1	0	0	0.000885154	0.45791	0.51488	-0.00184601	0.372428	0.496803	0.0126565	0.00456766	0.0291759
ENSMUSG00000019039	Dalrd3	DALRD3	55152	0	0	0	0.00139808	0.518207	0.574169	0.00425271	0.268982	0.386335	0.0120399	0.0592469	0.1518
ENSMUSG00000019054	Fis1	FIS1	51024	0	0	0	-0.0060765	0.00035507	0.00184392	0.0072118	0.00125437	0.00810277	-0.00651614	0.0078333	0.0388039
ENSMUSG00000019055	Plod1	PLOD1	5351	0	0	0	-0.00398717	0.00665542	0.0130284	0.0133835	0.000662762	0.0060117	0.0032594	0.261677	0.429003
ENSMUSG00000019066	Rab3d	RAB3D	9545	0	0	0	-0.0187541	0.000400524	0.00198183	0.0140715	0.00737701	0.02423	-0.00461752	0.430203	0.599555
ENSMUSG00000019080	Mfsd3	MFSD3	113655	0	0	0	-0.00421635	0.011411	0.0202391	-0.00622829	0.0232132	0.0574554	0.00119541	0.721344	0.827203
ENSMUSG00000019082	Slc25a22	SLC25A22	79751	0	0	0	0.00374567	0.0132001	0.0228145	-0.00394275	0.0861743	0.159211	-0.0151915	0.00245935	0.0215408
ENSMUSG00000019087	Atp6ap1	ATP6AP1	537	0	0	0	0.00465655	0.00107622	0.00352376	0.00186838	0.172567	0.274992	-0.000543828	0.777282	0.865159
ENSMUSG00000019088	Dnase1l1	DNASE1L1	1774	0	0	0	-0.00693742	0.00104021	0.0034593	0.00813673	0.00398636	0.0160183	-0.000226766	0.936051	0.965123
ENSMUSG00000019102	Aldh3a1	ALDH3A1	218	0	0	0	-0.00723696	0.00215682	0.00558867	0.0127299	0.00206801	0.010655	0.00366621	0.336124	0.50944
ENSMUSG00000019124	Scrn1	SCRN1	9805	0	0	0	-0.00988313	0.000225	0.00146583	0.0165116	0.000239773	0.00395959	0.00453559	0.11009	0.235628
ENSMUSG00000019132	BC005537	C6orf62	81688	0	0	0	-0.003054	0.0323248	0.0497546	-0.00261056	0.231152	0.344814	0.0190702	0.00119642	0.016212
ENSMUSG00000019139	Isyna1	ISYNA1	51477	0	0	0	-0.00970673	0.000439423	0.00207985	0.00847425	0.00455507	0.0174879	0.000802203	0.792904	0.876655
ENSMUSG00000019143	Hars2	HARS2	23438	0	0	0	-0.00250584	0.0164535	0.0275832	-0.00505029	0.00914633	0.0283101	-0.00344436	0.144523	0.284289
ENSMUSG00000019158	Tmem160	TMEM160	54958	0	0	0	0.00370219	0.171552	0.217505	0.00278205	0.524752	0.637278	-0.000465172	0.942948	0.969909
ENSMUSG00000019173	Rab5c	RAB5C	5878	0	0	0	0.000494989	0.64512	0.693691	0.0065933	0.00848191	0.0267796	0.000216981	0.937714	0.966088
ENSMUSG00000019179	Mdh2	MDH2	4191	0	0	0	0.0036507	0.000424301	0.00204379	0.00243121	0.0130147	0.0368626	0.00384234	0.0104065	0.0459653
ENSMUSG00000019188	H13	HM13	81502	0	0	0	0.00324152	0.000860052	0.00305833	-0.00547884	0.00093007	0.00704636	0.0065219	0.00202823	0.0200405
ENSMUSG00000019189	Rnf145	RNF145	153830	0	0	0	-0.0178576	0.00334196	0.00767403	0.00457623	0.509284	0.623057	0.00419923	0.684752	0.80369
ENSMUSG00000019210	Atp6v1e1	ATP6V1E1	529	0	0	0	0.00456611	0.00122185	0.00381183	0.000677091	0.606297	0.708193	0.00251099	0.226547	0.390556
ENSMUSG00000019214	Chtf18	CHTF18	63922	0	0	0	-0.00571351	0.173849	0.220101	0.0185683	0.0245348	0.0599902	0.000167456	0.986816	0.993241
ENSMUSG00000019230	Lhx9	LHX9	56956	0	0	0	-0.00931574	0.00169187	0.00475553	-0.00467246	0.142231	0.23719	0.00467362	0.307689	0.479951
ENSMUSG00000019254	Ppp1r12c	PPP1R12C	54776	0	0	0	0.0104743	0.00311539	0.00729235	0.00657302	0.127542	0.217773	-0.0015992	0.787567	0.872363
ENSMUSG00000019256	Ahr	AHR	196	0	0	0	-0.00977789	0.00193348	0.0052008	0.010406	0.012527	0.0357825	0.00166047	0.730977	0.833546
ENSMUSG00000019261	Map1s	MAP1S	55201	0	0	0	0.00722954	0.00108645	0.00354214	0.0183846	0.000283392	0.0042546	0.0105645	0.00868969	0.0413691
ENSMUSG00000019295	Tmem129	TMEM129	92305	0	0	0	0.000269198	0.788615	0.822178	0.00555396	0.0132671	0.0373833	0.0090548	0.00933479	0.0431008
ENSMUSG00000019297	Nop9	NOP9	161424	0	0	0	0.0165583	0.0423406	0.0630289	5.36e-05	0.996471	0.997517	-0.0111618	0.542284	0.697534
ENSMUSG00000019302	Atp6v0a1	ATP6V0A1	535	0	0	0	0.000139967	0.879512	0.900449	0.000203643	0.899149	0.933502	-0.0101614	0.00426556	0.0279508
ENSMUSG00000019303	Psmc3ip	PSMC3IP	29893	0	1	0	-0.00551608	0.00144974	0.00427805	0.0118748	0.00069799	0.00614209	-0.00502876	0.0748321	0.179359
ENSMUSG00000019338	Zfp687	ZNF687	57592	0	0	0	-0.00625948	0.0107124	0.0192326	0.0120534	0.00723855	0.0239633	0.000288568	0.952866	0.975026
ENSMUSG00000019362	D8Ertd738e	C19orf53	28974	0	0	0	-0.0081684	3.23e-06	0.000271226	-0.00495494	0.00029292	0.00435779	0.00124001	0.158816	0.303365
ENSMUSG00000019370	Calm3	CALM3	808	0	0	0	-0.00789589	0.000169755	0.00128865	0.000669556	0.597617	0.700701	-0.0080839	0.00413584	0.0274233
ENSMUSG00000019373	Cops3	COPS3	8533	0	0	0	-0.00123239	0.0477277	0.0700815	-0.00888101	0.000248689	0.00400702	-0.00506534	0.00774467	0.0386389
ENSMUSG00000019428	Fkbp8	FKBP8	23770	0	0	0	-0.00293444	0.00901084	0.0166318	-0.00249248	0.120249	0.20799	-0.00805027	0.0075	0.0380151
ENSMUSG00000019432	Ddx39b	DDX39B	7919	0	0	0	0.00672834	0.000319056	0.0017524	-0.00941644	0.000640035	0.00595057	-0.00471281	0.0385683	0.112729
ENSMUSG00000019433	Gipc1	GIPC1	10755	0	0	0	-0.00698286	7.66e-05	0.000874824	5.31e-05	0.953885	0.971026	-0.00994958	0.000679895	0.0139731
ENSMUSG00000019437	Tlcd1	TLCD1	116238	0	0	0	-0.0120781	0.00106267	0.00350187	0.00407243	0.239682	0.354671	0.00945486	0.0892015	0.202916
ENSMUSG00000019461	Plscr3	PLSCR3	57048	0	0	0	0.000426982	0.471556	0.527899	0.00150721	0.164346	0.264693	0.00059695	0.694437	0.810612
ENSMUSG00000019464	Ptger1	PTGER1	5731	0	0	0	-0.00357274	0.303686	0.358947	-0.00190211	0.74255	0.819373	-0.00726127	0.412214	0.583557
ENSMUSG00000019467	Arhgef25	ARHGEF25	115557	0	0	0	0.00534861	0.00545315	0.0111683	0.00187024	0.432752	0.553211	-0.0116036	0.0116458	0.0493771
ENSMUSG00000019470	Xab2	XAB2	56949	0	0	0	0.00996187	0.000242483	0.00153087	0.00485933	0.0242565	0.0595225	0.0112165	0.00420271	0.0276885
ENSMUSG00000019471	Cdc37	CDC37	11140	0	0	0	-0.000257841	0.62863	0.67819	-0.00186719	0.0729909	0.140056	-0.00306482	0.0543197	0.142756
ENSMUSG00000019478	Rab4a	RAB4A	5867	0	0	0	-0.00326835	0.0816848	0.112795	-0.00248187	0.398042	0.521628	-0.00692088	0.142346	0.28125
ENSMUSG00000019487	Trip10	TRIP10	9322	0	0	0	-0.00949848	0.000173864	0.00130577	0.0117488	0.000540909	0.0055466	-0.00729048	0.0133458	0.0541319
ENSMUSG00000019494	Cops6	COPS6	10980	0	0	0	-0.00425168	0.000831556	0.00300854	-0.00114711	0.302956	0.423074	-0.0140887	0.000364336	0.0123215
ENSMUSG00000019505	Ubb	UBB	7314	0	1	0	-0.00366045	0.00178584	0.00492645	-0.005791	0.00245428	0.0118418	-0.00531202	0.0166773	0.0632123
ENSMUSG00000019518	Ap4m1	AP4M1	9179	0	0	0	-0.0045834	0.0191093	0.0313464	0.00548495	0.0766351	0.145487	0.00339955	0.418631	0.58907
ENSMUSG00000019528	Gyg	GYG1	2992	0	0	0	-0.00363929	0.00727002	0.0139968	0.0182192	0.00017229	0.00347184	-0.0135087	0.00202299	0.0200372
ENSMUSG00000019539	Rcn3	RCN3	57333	0	0	0	-0.00529432	0.000822203	0.00298036	0.00870557	0.000973339	0.00717461	0.00204128	0.326835	0.499104
ENSMUSG00000019558	Slc6a8	SLC6A8	6535	0	0	0	0.0141163	0.00014222	0.00118069	0.00843709	0.00582002	0.0206389	-0.000817105	0.801008	0.881071
ENSMUSG00000019577	Pdk4	PDK4	5166	0	0	0	-0.0308912	3.85e-06	0.000286364	0.0176207	0.000432955	0.0050284	-0.00405849	0.233405	0.397936
ENSMUSG00000019578	Ubxn6	UBXN6	80700	0	0	0	0.00392163	0.00979624	0.0178369	0.00559478	0.022992	0.0570683	0.00267705	0.384135	0.555633
ENSMUSG00000019579	Mydgf	MYDGF	56005	0	0	0	0.00214012	0.0126903	0.0221071	0.0160314	6.17e-05	0.0027044	0.0181012	0.000190472	0.01114
ENSMUSG00000019590	Cyb561	CYB561	1534	0	0	0	-0.00962487	0.00402054	0.00878365	0.00437151	0.279448	0.398465	0.00448315	0.451613	0.619627
ENSMUSG00000019659	Ccdc12	CCDC12	151903	0	0	0	-0.00376306	0.00862622	0.0160933	-0.000609476	0.743676	0.820014	-0.0100115	0.00811635	0.0396918
ENSMUSG00000019689	Fmc1	FMC1	154791	0	0	0	-0.00390311	0.0550283	0.0794954	-0.000381255	0.901333	0.935024	-0.0022844	0.620874	0.759254
ENSMUSG00000019699	Akt3	AKT3	10000	0	1	0	-0.0102459	0.000672115	0.00264864	0.00840297	0.00956329	0.0292837	-0.00751005	0.0702361	0.171169
ENSMUSG00000019710	Mrpl24	MRPL24	79590	1	0	0	0.00721412	0.000351136	0.00183409	-0.0192036	6.73e-05	0.00271749	-0.00956653	0.00342028	0.0249911
ENSMUSG00000019715	Gle1	GLE1	2733	0	0	0	-0.00114907	0.272191	0.326127	0.00154902	0.379036	0.503678	0.00372917	0.180106	0.33211
ENSMUSG00000019718	L3hypdh	L3HYPDH	112849	0	0	0	-0.0146169	0.000508042	0.00226392	-0.00552735	0.115045	0.200719	-0.00562454	0.262995	0.430362
ENSMUSG00000019726	Lyst	LYST	1130	0	0	0	0.00600884	0.0519761	0.0755536	0.00758876	0.132606	0.224643	-0.00634075	0.375126	0.54661
ENSMUSG00000019731	Slc35e1	SLC35E1	79939	0	0	0	-0.00324636	0.0145341	0.0247831	-0.00197997	0.292358	0.412148	0.01108	0.00500402	0.0303692
ENSMUSG00000019738	Polr2i	POLR2I	5438	0	0	0	-0.000348857	0.824092	0.853101	-0.00074459	0.784945	0.851486	0.000350263	0.931486	0.962794
ENSMUSG00000019761	Krt10	KRT10	3858	0	0	0	-0.00391288	0.0136948	0.0235557	-0.00092771	0.668964	0.760126	-0.00493419	0.159423	0.304373
ENSMUSG00000019763	Rmnd1	RMND1	55005	0	0	0	-0.00597653	0.00497133	0.0103724	-0.00426489	0.127445	0.217672	-0.0132061	0.00976906	0.0443484
ENSMUSG00000019768	Esr1	ESR1	2099	0	0	0	-0.00752973	0.00258182	0.00636277	-0.00139318	0.606908	0.708761	0.00457539	0.278784	0.448437
ENSMUSG00000019773	Fbxo5	FBXO5	26271	0	1	0	-0.014032	4.41e-05	0.000689213	-0.00965308	0.00127797	0.00818589	0.0141661	0.00138837	0.0172408
ENSMUSG00000019774	Mtrf1l	MTRF1L	54516	0	0	0	0.00572568	0.107701	0.143919	-0.00377206	0.501093	0.61597	0.0143017	0.119119	0.249564
ENSMUSG00000019777	Hdac2	HDAC2	3066	0	0	0	-0.00345923	0.00291993	0.00695482	-0.0018313	0.180521	0.284772	-0.00543497	0.0218274	0.0757373
ENSMUSG00000019779	Frk	FRK	2444	0	0	0	-0.0257659	0.000104633	0.00101781	-0.00263679	0.474585	0.591873	0.00853318	0.150878	0.293694
ENSMUSG00000019782	Rwdd1	RWDD1	51389	0	0	0	-0.00153834	0.0513492	0.0747373	-0.00543992	0.00315507	0.0138185	-0.0111384	0.00109921	0.0158663
ENSMUSG00000019790	Stxbp5	STXBP5	134957	0	0	0	-0.00366406	0.137556	0.178799	-0.000185385	0.962304	0.9763	0.00696554	0.257503	0.424533
ENSMUSG00000019791	Hint3	HINT3	135114	0	0	0	-0.00328028	0.136996	0.178216	-0.00289705	0.413581	0.535913	-0.00930832	0.108284	0.233027
ENSMUSG00000019792	Trmt11	TRMT11	60487	0	0	0	-0.000476259	0.674227	0.720116	0.000272658	0.889657	0.927046	-0.00339067	0.269912	0.438047
ENSMUSG00000019794	Katna1	KATNA1	11104	0	0	0	0.0022034	0.0101955	0.0184552	0.00437142	0.0061208	0.0213547	-0.00503946	0.0179466	0.0665076
ENSMUSG00000019795	Pcmt1	PCMT1	5110	0	0	0	0.00357141	0.0014299	0.00423453	0.00139077	0.217701	0.329605	0.00893071	0.00165192	0.0185618
ENSMUSG00000019796	Lrp11	LRP11	84918	0	0	0	-0.000622362	0.692561	0.736602	-0.000663139	0.807967	0.869534	0.00212306	0.605135	0.747571
ENSMUSG00000019797	1700021F05Rik	C6orf203	51250	0	0	0	-0.00582781	0.00179948	0.00494737	-0.0126118	0.000860664	0.00681328	-0.016886	0.00127273	0.0166579
ENSMUSG00000019802	Sec63	SEC63	11231	0	0	0	0.00123242	0.353708	0.411389	0.00168867	0.454117	0.572273	0.0163336	0.00256075	0.0220239
ENSMUSG00000019804	Snx3	SNX3	8724	0	0	0	0.00596921	0.0104332	0.018814	0.00789586	0.0329123	0.0750931	-4.72e-05	0.991896	0.996298
ENSMUSG00000019806	Aig1	AIG1	51390	0	0	0	0.00543647	0.0167739	0.0279891	-0.0235336	0.000601661	0.00580169	-0.00232087	0.625318	0.762079
ENSMUSG00000019808	Adat2	ADAT2	134637	0	0	0	0.00751102	0.00405131	0.00883473	0.00896461	0.0188083	0.0487354	-0.0032436	0.484688	0.647761
ENSMUSG00000019809	Pex3	PEX3	8504	0	0	0	0.000808319	0.257434	0.310494	0.000795253	0.501998	0.616842	-0.00585507	0.011148	0.0481257
ENSMUSG00000019810	Fuca2	FUCA2	2519	0	0	0	0.000613054	0.643456	0.692206	0.0101743	0.00353942	0.0148482	0.000776816	0.820646	0.893433
ENSMUSG00000019813	Cep57l1	CEP57L1	285753	0	0	0	0.000912004	0.560274	0.615236	-0.000988737	0.713835	0.796632	0.000807424	0.841253	0.907711
ENSMUSG00000019814	Ltv1	LTV1	84946	0	0	0	0.00879005	8.98e-05	0.000953864	-0.0101243	0.000388811	0.00479613	-0.0053611	0.01737	0.0649174
ENSMUSG00000019817	Plagl1	PLAGL1	5325	0	0	0	0.00584345	0.0114407	0.0202834	0.00493307	0.140987	0.23539	0.00761344	0.133322	0.268457
ENSMUSG00000019818	Cd164	CD164	8763	0	0	0	-0.00264093	0.00092229	0.00318761	0.00236006	0.0101372	0.0305747	0.000651117	0.535467	0.691638
ENSMUSG00000019820	Utrn	UTRN	7402	0	0	0	0.000483181	0.612374	0.663154	0.0143008	0.000348951	0.00471547	-0.0144501	0.00137902	0.017217
ENSMUSG00000019822	Smpd2	SMPD2	6610	0	0	0	-0.00681229	0.00506949	0.0105216	0.00700377	0.0427247	0.0920124	0.00589953	0.208495	0.36871
ENSMUSG00000019823	Mical1	MICAL1	64780	0	0	0	0.01216	0.000130594	0.0011301	0.00011177	0.951386	0.969177	0.00710317	0.0306108	0.0959636
ENSMUSG00000019826	Zbtb24	ZBTB24	9841	0	0	0	0.0116741	0.000299301	0.00170054	0.00202087	0.365106	0.489259	0.00908394	0.023607	0.0800902
ENSMUSG00000019831	Wasf1	WASF1	8936	0	0	0	-0.00328598	0.126053	0.165581	0.00764664	0.0514571	0.106143	0.00855562	0.124515	0.257029
ENSMUSG00000019832	Rab32	RAB32	10981	0	0	0	-0.00446012	0.0757813	0.105585	0.0034742	0.37599	0.500691	0.00102291	0.859309	0.919683
ENSMUSG00000019837	Gtf3c6	GTF3C6	112495	0	0	0	-0.00156646	0.274717	0.32881	-0.000322463	0.892192	0.929147	0.00643391	0.103038	0.22534
ENSMUSG00000019841	Rev3l	REV3L	5980	0	0	0	-0.00102715	0.457538	0.514522	0.00557489	0.0435872	0.0933779	0.00359964	0.324599	0.497444
ENSMUSG00000019842	Traf3ip2	TRAF3IP2	10758	1	0	0	0.00181134	0.290295	0.344929	-0.000750858	0.792066	0.857422	0.00212922	0.619082	0.758195
ENSMUSG00000019843	Fyn	FYN	2534	0	0	0	0.0235803	8.97e-05	0.000953864	-0.0174419	0.00175629	0.00969224	0.00493944	0.322083	0.494581
ENSMUSG00000019845	Tube1	TUBE1	51175	0	0	0	-0.0049672	0.00684371	0.0133331	0.00792721	0.0099146	0.0301096	0.00236139	0.502159	0.662701
ENSMUSG00000019848	Popdc3	POPDC3	64208	0	0	0	-0.00369851	0.0449995	0.0665366	0.00885964	0.0126712	0.0360864	-0.00359757	0.393793	0.565893
ENSMUSG00000019849	Prep	PREP	5550	0	0	0	0.00123764	0.156362	0.200558	-0.00950721	0.000820367	0.00660127	0.000907102	0.665061	0.789841
ENSMUSG00000019850	Tnfaip3	TNFAIP3	7128	0	0	0	0.0262788	0.000113024	0.00105122	0.0316036	0.000415734	0.00493161	-0.023211	0.00500935	0.0303784
ENSMUSG00000019853	Hebp2	HEBP2	23593	0	0	0	-0.0152332	0.000273252	0.00162305	0.00208127	0.459012	0.576917	-0.0118068	0.0215812	0.0752621
ENSMUSG00000019854	Reps1	REPS1	85021	0	0	0	0.000986606	0.397519	0.455217	0.00250266	0.226224	0.33947	-0.01094	0.00717046	0.0370339
ENSMUSG00000019857	Asf1a	ASF1A	25842	0	0	0	0.00323547	0.453954	0.510995	-0.0185816	0.0342872	0.0775496	0.00574586	0.604498	0.747455
ENSMUSG00000019861	Gopc	GOPC	57120	0	0	0	0.00172761	0.298494	0.353568	0.00215769	0.440089	0.560273	0.00523077	0.231808	0.395896
ENSMUSG00000019863	Qrsl1	QRSL1	55278	0	0	0	-0.00560075	0.0128262	0.0222997	-0.00643565	0.0644903	0.126812	-0.0156452	0.00985376	0.0445668
ENSMUSG00000019864	Rtn4ip1	RTN4IP1	84816	0	0	0	-0.00771367	0.00274344	0.00664296	-0.0103715	0.0072757	0.0240329	-0.00611418	0.17698	0.327932
ENSMUSG00000019866	Crybg1	CRYBG1	202	0	0	0	-0.0198906	6.61e-05	0.000836581	0.00649069	0.031483	0.0724972	0.000573894	0.878813	0.931668
ENSMUSG00000019868	Vta1	VTA1	51534	0	0	0	-0.00229856	0.0237164	0.0377877	-0.00326379	0.0520677	0.107055	-0.00971653	0.00349091	0.0252759
ENSMUSG00000019872	Smpdl3a	SMPDL3A	10924	0	0	0	0.00208362	0.308069	0.363555	0.0142776	0.00440988	0.0171654	-0.0220021	0.00398348	0.0270291
ENSMUSG00000019873	Reep3	REEP3	221035	0	0	0	-0.00140477	0.322705	0.379107	0.00164842	0.490742	0.606865	0.00273921	0.449244	0.618007
ENSMUSG00000019877	Serinc1	SERINC1	57515	0	0	0	0.00218751	0.0021729	0.00561636	-0.00618316	0.000413112	0.0049178	0.00556445	0.00238759	0.0213201
ENSMUSG00000019878	Hsf2	HSF2	3298	0	0	0	-0.00394203	0.00377465	0.00840117	0.00111622	0.481451	0.598623	0.00552266	0.0449607	0.126144
ENSMUSG00000019883	Echdc1	ECHDC1	55862	0	0	0	-0.0179545	0.000474476	0.00217555	-0.00679215	0.108978	0.192009	-0.012931	0.0527856	0.140206
ENSMUSG00000019889	Ptprk	PTPRK	5796	0	0	0	0.0149656	3.59e-05	0.000662413	-0.0071695	0.00363575	0.0150754	0.00110817	0.650054	0.779928
ENSMUSG00000019891	Dcbld1	DCBLD1	285761	0	0	0	0.00555122	0.0365309	0.0553821	-0.00312367	0.429263	0.550161	0.00903154	0.154069	0.297427
ENSMUSG00000019897	Ccdc59	CCDC59	29080	0	0	0	0.00815575	0.000529808	0.00231424	0.00467244	0.031281	0.072134	0.00416705	0.155174	0.298702
ENSMUSG00000019899	Lama2	LAMA2	3908	0	0	0	0.00531324	0.0133101	0.0229872	-0.0014458	0.621388	0.720343	-0.00393364	0.380833	0.552494
ENSMUSG00000019907	Ppp1r12a	PPP1R12A	4659	0	1	0	0.0137869	7.63e-05	0.000874621	0.00413179	0.0489589	0.102113	0.00757535	0.0225267	0.0773988
ENSMUSG00000019916	P4ha1	P4HA1	5033	0	0	0	0.000994606	0.0982853	0.132759	0.0104348	0.000140559	0.00320318	0.00682439	0.00258977	0.0220386
ENSMUSG00000019917	Sept10	SEPT10	151011	0	0	0	-0.00963066	0.000523164	0.00229574	-0.0131362	0.001141	0.0077191	-0.0100827	0.0135806	0.0547821
ENSMUSG00000019920	Lims1	LIMS1	3987	1	0	0	0.0101009	6.99e-05	0.000856163	0.00735649	0.00150358	0.00893095	-0.0110468	0.00151643	0.0177559
ENSMUSG00000019923	Zwint	ZWINT	11130	0	1	0	-0.00705895	0.000298427	0.00169816	-0.010322	0.000509441	0.00535812	0.00822803	0.00458322	0.0291938
ENSMUSG00000019927	Ube2d1	UBE2D1	7321	0	1	0	-0.00306257	0.201539	0.2508	-0.000945292	0.808243	0.869749	-0.00279954	0.63252	0.767015
ENSMUSG00000019942	Cdk1	CDK1	983	0	1	0	-0.00533053	0.00028715	0.00166498	-0.00284421	0.0202473	0.0516453	0.00749958	0.0022361	0.0208484
ENSMUSG00000019943	Atp2b1	ATP2B1	490	0	0	0	0.00572284	0.000740385	0.00281095	0.00777549	0.00163505	0.00937594	0.00186613	0.386564	0.558441
ENSMUSG00000019944	Rhobtb1	RHOBTB1	9886	0	0	0	-0.00105479	0.662418	0.709424	-0.00205348	0.623905	0.722435	0.0080628	0.22373	0.38727
ENSMUSG00000019947	Arid5b	ARID5B	84159	1	0	0	-0.000145248	0.885628	0.905495	0.0243921	6.01e-05	0.0027044	-0.00604966	0.0478733	0.131778
ENSMUSG00000019948	Actr6	ACTR6	64431	0	0	0	0.000856953	0.567464	0.6217	-0.00314523	0.242667	0.357654	0.00982202	0.0331963	0.101573
ENSMUSG00000019951	Uhrf1bp1l	UHRF1BP1L	23074	0	0	0	0.00544772	0.00209921	0.00548413	-0.00483803	0.0292464	0.0683791	-0.0111474	0.00506495	0.0305665
ENSMUSG00000019952	Poc1b	POC1B	282809	0	0	0	-0.00187458	0.307595	0.363071	0.000462213	0.880325	0.920626	-0.00347592	0.456209	0.623689
ENSMUSG00000019960	Dusp6	DUSP6	1848	1	0	0	-0.0054918	0.000570455	0.00240641	0.00489212	0.00562972	0.0201893	-0.0141274	0.000589336	0.0138047
ENSMUSG00000019961	Tmpo	TMPO	7112	0	1	0	-0.00501677	0.00276294	0.00667681	0.00212697	0.264038	0.381051	0.0044452	0.137953	0.275015
ENSMUSG00000019966	Kitl	KITLG	4254	0	0	0	-0.00552271	0.0147415	0.0250845	0.00451818	0.173451	0.276247	-0.0107938	0.0469619	0.129917
ENSMUSG00000019969	Psen1	PSEN1	5663	0	0	0	0.00276599	0.00359467	0.00809109	0.00365522	0.0106836	0.0318198	-0.00229652	0.188359	0.343235
ENSMUSG00000019970	Sgk1	SGK1	6446	0	0	0	0.0179368	0.000131206	0.00113109	0.0329196	0.000101049	0.00300496	-0.00896046	0.0547926	0.143674
ENSMUSG00000019971	Cep290	CEP290	80184	0	1	0	0.00142457	0.272229	0.326139	0.00810476	0.00658593	0.0224703	0.00462049	0.180366	0.332537
ENSMUSG00000019975	Ikbip	IKBIP	121457	0	0	0	-0.00884632	0.000191346	0.00136471	0.0124873	0.000373601	0.00477864	-0.00477186	0.0582855	0.150042
ENSMUSG00000019977	Hbs1l	HBS1L	10767	0	0	0	0.00866953	0.000199038	0.00138083	-0.00171608	0.25579	0.371964	-0.000384473	0.859538	0.919756
ENSMUSG00000019978	Epb41l2	EPB41L2	2037	0	0	0	0.00583023	0.0599223	0.0858176	0.00405204	0.395485	0.519085	-2.85e-05	0.996787	0.998563
ENSMUSG00000019979	Apaf1	APAF1	317	0	0	0	0.000331217	0.899542	0.917507	0.0119805	0.0292661	0.0684111	-0.0154368	0.0510803	0.137496
ENSMUSG00000019984	Med23	MED23	9439	0	0	0	-0.00482023	0.0480646	0.0705219	0.00264413	0.472371	0.589754	0.00489917	0.382127	0.553709
ENSMUSG00000019986	Ahi1	AHI1	54806	0	0	0	0.0027689	0.0221558	0.0356537	-0.00872403	0.00220778	0.0111264	-0.00769416	0.0173191	0.0648122
ENSMUSG00000019988	Nedd1	NEDD1	121441	0	1	0	-0.00661274	0.000960664	0.003265	9.93e-05	0.955168	0.971714	-0.00959918	0.00767474	0.0384577
ENSMUSG00000019989	Enpp3	ENPP3	5169	0	0	0	-0.00483732	0.0281216	0.0439856	4.19e-05	0.989514	0.993624	-0.00163915	0.731423	0.833821
ENSMUSG00000019992	Mtfr2	MTFR2	113115	0	0	0	-0.00851489	0.00131014	0.00399095	0.00826055	0.0112765	0.0331202	0.0204838	0.0017229	0.0186199
ENSMUSG00000019997	Ctgf	CTGF	1490	0	0	0	0.0405703	9.35e-06	0.000365065	0.0443221	7.19e-05	0.00274179	-0.0194473	0.00583951	0.0330529
ENSMUSG00000019998	Stx7	STX7	8417	0	0	0	0.00724525	0.000644231	0.0025903	-0.000503641	0.767225	0.838145	-0.00405404	0.143277	0.282504
ENSMUSG00000020003	Pex7	PEX7	5191	0	0	0	0.00477522	0.198951	0.247876	-0.00640617	0.301874	0.421872	-0.0163098	0.103531	0.226072
ENSMUSG00000020009	Ifngr1	IFNGR1	3459	0	0	0	-0.00489264	0.00260944	0.00640326	-0.00565767	0.0127996	0.0363977	0.00805043	0.015799	0.0609376
ENSMUSG00000020015	Cdk17	CDK17	5128	0	0	0	0.00781856	0.00262063	0.0064252	-0.00231865	0.416419	0.53853	-0.0077388	0.0992288	0.219316
ENSMUSG00000020018	Snrpf	SNRPF	6636	0	0	0	0.000311542	0.879603	0.900462	-0.00104256	0.770563	0.840508	0.00116916	0.826821	0.897518
ENSMUSG00000020021	Fgd6	FGD6	55785	0	0	0	0.00100273	0.366336	0.423878	-0.00267028	0.179556	0.283719	-0.00339143	0.249491	0.415971
ENSMUSG00000020022	Ndufa12	NDUFA12	55967	0	0	0	0.00406503	0.00260044	0.00639235	-0.00441413	0.0166295	0.0443351	0.00473689	0.0593901	0.152041
ENSMUSG00000020023	Tmcc3	TMCC3	57458	0	0	0	0.00661642	0.00872797	0.0162302	-0.00226712	0.493081	0.609032	-0.00456983	0.366202	0.538339
ENSMUSG00000020024	Cep83	CEP83	51134	0	0	0	0.00118612	0.385282	0.442691	3.53e-05	0.987803	0.992292	-0.00202344	0.561618	0.713166
ENSMUSG00000020027	Socs2	SOCS2	8835	0	0	0	0.00240186	0.127948	0.167878	-0.0214678	0.00035979	0.00473103	0.00178749	0.633519	0.767414
ENSMUSG00000020029	Nudt4	NUDT4	11163	0	0	0	0.00801506	0.00322526	0.00746752	-0.00111646	0.715644	0.798088	-0.000996593	0.827814	0.898203
ENSMUSG00000020032	Nuak1	NUAK1	9891	0	0	0	-0.00287959	0.164179	0.209108	0.0163537	0.00243462	0.011774	0.0015252	0.758843	0.851679
ENSMUSG00000020034	Tcp11l2	TCP11L2	255394	0	0	0	0.00361539	0.107145	0.143294	-0.0054699	0.148154	0.244536	0.00376391	0.48035	0.643768
ENSMUSG00000020038	Cry1	CRY1	1407	0	0	0	0.0188806	0.0012215	0.00381183	0.00217241	0.688817	0.776285	0.0238167	0.0186149	0.0680933
ENSMUSG00000020042	Btbd11	BTBD11	121551	0	0	0	0.00170007	0.485894	0.542094	-0.00221612	0.596373	0.699888	-0.00965695	0.153699	0.297209
ENSMUSG00000020044	Timp3	TIMP3	7078	0	0	0	0.0337932	8.92e-06	0.000351879	0.00647747	0.0448208	0.0955276	-0.0147061	0.00841171	0.0405691
ENSMUSG00000020048	Hsp90b1	HSP90B1	7184	0	0	0	-0.00174039	0.00744546	0.0142602	0.00578112	0.000759615	0.00640088	0.00992905	0.000489336	0.0131718
ENSMUSG00000020056	Washc3	WASHC3	51019	0	0	0	-0.00534475	0.000334615	0.00179383	-0.00920443	0.000324913	0.00454645	-0.0150535	0.000246416	0.0118445
ENSMUSG00000020057	Dram1	DRAM1	55332	0	0	0	-0.0149489	0.000231381	0.00148624	0.00998361	0.00626949	0.0216751	0.000182965	0.962578	0.981035
ENSMUSG00000020063	Sirt1	SIRT1	23411	0	0	0	0.00669401	0.00800551	0.0151127	0.0114121	0.0088847	0.0276349	0.0104461	0.0612648	0.155231
ENSMUSG00000020064	Herc4	HERC4	26091	0	0	0	-0.00392635	0.0112339	0.0199821	-0.00606209	0.0190737	0.0492891	0.00475765	0.156768	0.300472
ENSMUSG00000020069	Hnrnph3	HNRNPH3	3189	0	0	0	4.89e-06	0.997035	0.997297	-0.00900604	0.00550612	0.0198895	0.007491	0.0566395	0.147196
ENSMUSG00000020070	Rufy2	RUFY2	55680	0	0	0	-0.00214659	0.112278	0.149386	0.0111228	0.00196434	0.0103797	0.00410334	0.222327	0.385834
ENSMUSG00000020074	Ccar1	CCAR1	55749	0	0	0	-0.00381841	0.00304161	0.00717	-0.0276247	1.5e-05	0.00213819	0.0187137	0.000363287	0.0123215
ENSMUSG00000020075	Ddx21	DDX21	9188	0	0	0	0.0084984	6.93e-05	0.000856163	-0.0119649	0.000145455	0.00321839	-0.0115954	0.000720455	0.0140407
ENSMUSG00000020076	Ddx50	DDX50	79009	0	0	0	0.00673891	0.00125726	0.00388835	-0.00322694	0.128143	0.218473	-0.0111394	0.00635857	0.034639
ENSMUSG00000020078	Vps26a	VPS26A	9559	0	0	0	0.00620607	0.00201748	0.00533765	0.00585399	0.0219318	0.0551186	0.00437595	0.18751	0.34196
ENSMUSG00000020079	Supv3l1	SUPV3L1	6832	0	0	0	0.00385216	0.0125608	0.0219147	-0.00343793	0.129919	0.220881	-0.0191038	0.0012	0.016212
ENSMUSG00000020083	Fam241b	FAM241B	219738	0	0	0	-0.00350344	0.0157917	0.0266259	0.00449196	0.0528852	0.10825	0.00131851	0.661883	0.787759
ENSMUSG00000020085	Aifm2	AIFM2	84883	0	0	0	-0.0101614	0.00179834	0.00494543	-0.000881407	0.787989	0.853736	-0.010142	0.0690069	0.169081
ENSMUSG00000020086	H2afy2	H2AFY2	55506	0	0	0	-0.0164461	7.67e-05	0.000874824	0.00653192	0.0165291	0.0441497	-0.00729943	0.0514175	0.137866
ENSMUSG00000020087	Tysnd1	TYSND1	219743	0	0	0	0.0182563	0.0146627	0.0249726	0.00239151	0.816092	0.875149	0.0100097	0.520115	0.678231
ENSMUSG00000020088	Sar1a	SAR1A	56681	0	0	0	0.000792975	0.139803	0.181311	-0.00153399	0.103095	0.183366	0.0117565	0.000298601	0.0120245
ENSMUSG00000020089	Ppa1	PPA1	5464	0	0	0	0.00136007	0.00667885	0.0130631	-0.0146668	5.86e-06	0.0018174	0.0105829	0.000144318	0.0106516
ENSMUSG00000020091	Eif4ebp2	EIF4EBP2	1979	0	0	0	-0.00966549	0.000544056	0.00234779	0.000452795	0.834145	0.88843	0.00937355	0.0196193	0.0704694
ENSMUSG00000020092	Pald1	PALD1	27143	0	0	0	-0.0184988	0.000436451	0.00207048	0.00561531	0.174851	0.277883	0.00478247	0.42048	0.590726
ENSMUSG00000020097	Sgpl1	SGPL1	8879	0	0	0	0.00687225	0.004784	0.0100475	0.00272823	0.360437	0.485052	-0.0100684	0.0483155	0.132772
ENSMUSG00000020099	Unc5b	UNC5B	219699	0	0	0	0.00132682	0.178574	0.225335	-0.00449695	0.0217917	0.0548388	-0.0244186	0.000199301	0.0112157
ENSMUSG00000020100	Slc29a3	SLC29A3	55315	0	0	0	-0.006661	0.00569711	0.0115713	0.00207433	0.487846	0.604374	-0.00140332	0.752351	0.847135
ENSMUSG00000020101	Vsir	VSIR	64115	0	0	0	-0.00483616	0.00118164	0.00373322	0.00350503	0.0328399	0.0749487	0.00225215	0.293062	0.462603
ENSMUSG00000020105	Lrig3	LRIG3	121227	0	0	0	0.00416753	0.250707	0.30318	0.00850486	0.180556	0.284788	0.00523042	0.561932	0.713223
ENSMUSG00000020107	Anapc16	ANAPC16	119504	0	1	0	0.00721181	0.000166521	0.00127595	-0.00414931	0.00795079	0.0255857	0.00126192	0.470983	0.635729
ENSMUSG00000020108	Ddit4	DDIT4	54541	1	0	0	0.0239611	0.000304021	0.00170909	-0.000482766	0.915092	0.943888	-0.00397434	0.560536	0.712345
ENSMUSG00000020109	Dnajb12	DNAJB12	54788	1	0	0	-0.00379722	0.0123397	0.0216214	0.00499818	0.0390384	0.085934	-0.0156368	0.00220796	0.0207041
ENSMUSG00000020111	Micu1	MICU1	10367	0	0	0	0.000595184	0.584787	0.638355	-0.0096033	0.00213794	0.0108847	-0.0045401	0.138457	0.275709
ENSMUSG00000020114	Cand1	CAND1	55832	0	0	0	0.0204302	0.0090778	0.0167446	0.0118531	0.264644	0.381782	0.0070261	0.648069	0.778853
ENSMUSG00000020115	Tbk1	TBK1	29110	0	0	0	-0.00687274	0.000791084	0.00291559	0.00501822	0.0193588	0.0499132	-0.00781054	0.0163641	0.0624017
ENSMUSG00000020116	Pno1	PNO1	56902	0	0	0	0.00625861	0.000343094	0.00181805	-0.0128947	0.000174038	0.00348252	-0.00515204	0.0222653	0.0768139
ENSMUSG00000020120	Plek	PLEK	5341	0	0	0	0.00967476	0.00420114	0.0090664	-0.0422575	0.000168007	0.00347184	0.00871141	0.173767	0.323709
ENSMUSG00000020122	Egfr	EGFR	1956	0	0	0	-0.00123544	0.466346	0.522834	-0.00488898	0.121807	0.210085	-0.000450767	0.917035	0.955193
ENSMUSG00000020123	Avpr1a	AVPR1A	552	0	0	0	-0.0163251	0.000135402	0.00114317	0.0336565	6.63e-05	0.00271749	-0.000280106	0.939721	0.967372
ENSMUSG00000020124	Usp15	USP15	9958	0	0	0	0.0013571	0.152034	0.195687	0.0025603	0.120821	0.208727	-0.0126689	0.00160962	0.0183956
ENSMUSG00000020128	Vps54	VPS54	51542	1	0	0	0.000761721	0.665551	0.712179	0.00291556	0.348921	0.473054	-0.0102346	0.0526891	0.140015
ENSMUSG00000020130	Tbc1d15	TBC1D15	64786	0	0	0	0.00734146	0.000624388	0.00254145	0.00993032	0.00139362	0.00857527	0.0141357	0.00167832	0.0185922
ENSMUSG00000020131	Pcsk4	PCSK4	54760	0	0	0	0.00435082	0.0317838	0.0490367	-0.00322733	0.28982	0.409325	0.002595	0.560946	0.712689
ENSMUSG00000020132	Rab21	RAB21	23011	0	0	0	0.004665	0.0206802	0.0336053	0.00531874	0.0932621	0.169433	-0.00322457	0.457596	0.624615
ENSMUSG00000020133	2310011J03Rik	C19orf25	148223	0	0	0	-0.00252767	0.0472076	0.0693891	-0.0159531	0.000397815	0.00483491	0.00181202	0.52954	0.686841
ENSMUSG00000020134	Peli1	PELI1	57162	0	0	0	0.0167366	0.00681023	0.0132769	0.0118199	0.158235	0.257132	0.00997332	0.404342	0.575762
ENSMUSG00000020137	Thap2	THAP2	83591	0	0	0	0.00165865	0.270948	0.32491	-0.0109456	0.0036965	0.0152334	-0.00855944	0.0486145	0.133305
ENSMUSG00000020142	Slc1a4	SLC1A4	6509	1	0	0	0.019253	5.68e-05	0.000794251	-0.0195667	0.000400962	0.00483491	-0.00745989	0.0628937	0.157994
ENSMUSG00000020149	Rab1a	RAB1A	5861	0	1	0	-0.000580407	0.363084	0.420668	0.00123149	0.26886	0.386256	0.00338092	0.0655438	0.162686
ENSMUSG00000020150	Gamt	GAMT	2593	0	0	0	-0.00957617	0.00187788	0.00510528	0.015168	0.00258322	0.012247	-0.00613458	0.21682	0.379038
ENSMUSG00000020152	Actr2	ACTR2	10097	0	0	0	0.000868267	0.0858512	0.117833	0.000398694	0.610681	0.711642	-0.00472425	0.00509694	0.0306567
ENSMUSG00000020153	Ndufs7	NDUFS7	374291	0	0	0	-0.00102934	0.153436	0.19727	-0.00390793	0.0101598	0.0306067	-0.00339787	0.0802096	0.187724
ENSMUSG00000020156	Mum1	MUM1	84939	0	0	0	-0.0211163	2.67e-05	0.000585149	-0.00944611	0.00368462	0.0152009	-0.00702496	0.057708	0.149058
ENSMUSG00000020160	Meis1	MEIS1	4211	0	0	0	0.00789685	0.00077299	0.00287858	0.0018759	0.349651	0.473878	-0.00760845	0.0310355	0.0968282
ENSMUSG00000020163	Uqcr11	UQCR11	10975	0	0	0	-0.00702285	0.00195656	0.00523696	-0.00254096	0.288965	0.408522	-0.00895622	0.0315184	0.0978096
ENSMUSG00000020166	Cnot2	CNOT2	4848	0	0	0	-0.00387192	0.00202351	0.00534742	0.00433801	0.0107052	0.031872	-0.00058476	0.762759	0.854852
ENSMUSG00000020167	Tcf3	TCF3	6929	0	0	0	-0.00733298	0.00869126	0.0161803	0.00721021	0.0781378	0.1478	-0.00265772	0.627098	0.763186
ENSMUSG00000020170	Frs2	FRS2	10818	0	0	0	-0.013215	0.000287762	0.00166599	0.00454532	0.0945622	0.171167	0.00656432	0.106122	0.2298
ENSMUSG00000020171	Yeats4	YEATS4	8089	0	0	0	0.0065893	0.0592728	0.0849619	0.00290535	0.584271	0.688841	-0.000889454	0.910506	0.950903
ENSMUSG00000020173	Cobl	COBL	23242	0	0	0	-0.00020723	0.927002	0.940318	-0.00429361	0.289754	0.409325	-0.013155	0.0532535	0.140893
ENSMUSG00000020175	Rab36	RAB36	9609	0	0	0	-0.00371415	0.154975	0.199003	0.00362036	0.39248	0.515792	-0.00304953	0.62691	0.763044
ENSMUSG00000020178	Adora2a	ADORA2A	135	0	0	0	0.0204741	0.000130944	0.00113109	0.00934173	0.0163202	0.0437551	0.00735036	0.142899	0.281952
ENSMUSG00000020180	Snrpd3	SNRPD3	6634	0	0	0	0.00421867	0.0350673	0.053411	-0.000682487	0.816416	0.875224	0.00726858	0.130939	0.265688
ENSMUSG00000020181	Nav3	NAV3	89795	0	0	0	-0.00348119	0.0561709	0.080962	0.00140538	0.610609	0.711642	0.000151224	0.970688	0.98533
ENSMUSG00000020184	Mdm2	MDM2	4193	0	1	0	0.00994422	0.000473252	0.00217343	0.00922964	0.00390245	0.0157753	-0.0100486	0.0139517	0.0558656
ENSMUSG00000020185	E2f7	E2F7	144455	0	0	0	-0.017671	9.62e-07	0.00018653	-0.00011048	0.912972	0.942806	-0.00171197	0.278009	0.447568
ENSMUSG00000020186	Csrp2	CSRP2	1466	0	0	0	0.00916427	9.5e-05	0.000983511	0.0112244	0.000325087	0.00454645	0.0144063	0.000583129	0.0137814
ENSMUSG00000020189	Osbpl8	OSBPL8	114882	0	0	0	0.0127027	0.000942045	0.00322858	0.00989923	0.0185464	0.0481988	-0.00127789	0.799644	0.88054
ENSMUSG00000020190	Mknk2	MKNK2	2872	0	0	0	-0.00977348	0.000351748	0.00183409	0.00953638	0.00240201	0.0116932	0.00395638	0.198665	0.356342
ENSMUSG00000020196	Cabin1	CABIN1	23523	0	0	0	0.00176461	0.0253548	0.0401022	0.00762043	0.000855769	0.00677978	0.0131241	0.000548514	0.0136951
ENSMUSG00000020198	Ap3d1	AP3D1	8943	0	0	0	0.00538656	0.00069257	0.0027041	-0.00315454	0.038839	0.0855774	0.0115103	0.00131101	0.0169278
ENSMUSG00000020205	Phlda1	PHLDA1	22822	0	1	0	0.0362395	2.8e-06	0.000271226	0.0380339	3.08e-05	0.00236478	-0.00254689	0.473703	0.638243
ENSMUSG00000020211	Sf3a2	SF3A2	8175	0	0	0	0.00612408	0.00112456	0.00362563	0.0140072	0.000433392	0.0050284	0.0149832	0.00139502	0.0172408
ENSMUSG00000020212	Mdm1	MDM1	56890	0	0	0	-0.0155535	0.00141687	0.00421341	0.0113831	0.0388232	0.0855716	0.00663654	0.356013	0.528934
ENSMUSG00000020216	Jsrp1	JSRP1	126306	0	0	0	0.000644076	0.664651	0.711416	0.0098769	0.00614467	0.0213988	0.000881241	0.818801	0.892285
ENSMUSG00000020219	Timm13	TIMM13	26517	0	0	0	0.00277118	0.00750778	0.0143483	0.000302965	0.819253	0.876977	0.00401332	0.0741031	0.178144
ENSMUSG00000020220	Vps13d	VPS13D	55187	0	0	0	0.00252823	0.116409	0.154187	-0.00417319	0.129274	0.220041	0.000876801	0.816897	0.890893
ENSMUSG00000020224	Llph	LLPH	84298	1	0	0	0.0150033	2.29e-05	0.000549311	-0.017696	0.000104895	0.00300496	-0.000273189	0.901048	0.945427
ENSMUSG00000020225	Tmbim4	TMBIM4	51643	0	0	0	-0.000838814	0.205497	0.255198	-0.00188399	0.111063	0.195051	0.00379247	0.0443794	0.125234
ENSMUSG00000020228	Helb	HELB	92797	0	0	0	-0.0221827	0.000161713	0.00125169	0.00426504	0.245101	0.360114	0.00326928	0.53911	0.694921
ENSMUSG00000020230	Prmt2	PRMT2	3275	0	0	0	0.00179873	0.0131754	0.0227855	0.00060224	0.543471	0.654115	-0.0164422	0.000147028	0.0107134
ENSMUSG00000020231	Dip2a	DIP2A	23181	0	0	0	0.00617216	0.00133671	0.0040455	0.0125325	0.000786801	0.0065018	-0.0065398	0.041138	0.118319
ENSMUSG00000020232	Hmg20b	HMG20B	10362	0	0	0	-0.00473857	0.00268348	0.00653255	0.0110757	0.000992483	0.0072363	-0.0146411	0.00152605	0.0178143
ENSMUSG00000020235	Fzr1	FZR1	51343	0	1	0	-0.00248287	0.503793	0.559824	-0.000790492	0.901328	0.935024	-0.00094943	0.920464	0.957022
ENSMUSG00000020238	Ncln	NCLN	56926	0	0	0	-0.00277827	0.00454292	0.00963139	-0.00691384	0.00131014	0.00828066	-0.000274115	0.875217	0.929233
ENSMUSG00000020241	Col6a2	COL6A2	1292	0	0	0	0.006349	0.143941	0.186318	0.0105443	0.155346	0.253697	-0.00236218	0.819256	0.892581
ENSMUSG00000020246	Hcfc2	HCFC2	29915	0	0	0	0.00230482	0.0508215	0.0740634	0.0104751	0.00132098	0.00831243	0.00631946	0.0424571	0.12098
ENSMUSG00000020248	Nfyb	NFYB	4801	0	0	0	-0.0114141	7.88e-05	0.000886403	-0.0172492	0.000126748	0.00307758	0.00817569	0.00782351	0.0388039
ENSMUSG00000020250	Txnrd1	TXNRD1	7296	0	0	0	0.00632304	0.00949519	0.0173828	-0.0133273	0.00453024	0.0174381	0.00391534	0.424093	0.594271
ENSMUSG00000020251	Glt8d2	GLT8D2	83468	0	0	0	-0.00945464	0.000770804	0.00287545	0.0110121	0.00291993	0.0132136	-0.00578978	0.132282	0.267538
ENSMUSG00000020253	Ppm1m	PPM1M	132160	0	0	0	-0.00322717	0.400579	0.458308	0.00965191	0.165121	0.265718	-0.0023918	0.805808	0.883778
ENSMUSG00000020255	D10Wsu102e	C12orf45	121053	0	0	0	0.00178444	0.00754746	0.0144076	-0.00413519	0.00260262	0.0123045	0.00471924	0.00727867	0.0373064
ENSMUSG00000020256	Aldh1l2	ALDH1L2	160428	1	0	0	0.0336478	3.06e-06	0.000271226	-0.0471224	9.18e-06	0.0020196	-0.00719188	0.0610054	0.15478
ENSMUSG00000020257	Wdr82	WDR82	80335	0	0	0	-0.00514682	0.00179021	0.00493494	-0.0028029	0.121134	0.209141	0.00370828	0.165552	0.31263
ENSMUSG00000020260	Pofut2	POFUT2	23275	0	0	0	0.00325799	0.00314073	0.00733116	0.0034126	0.0240686	0.0591758	-0.000779864	0.674219	0.79631
ENSMUSG00000020261	Slc36a1	SLC36A1	206358	0	0	0	-0.0039124	0.0536189	0.0777243	-0.00177866	0.561781	0.67043	-0.00418696	0.372777	0.544576
ENSMUSG00000020262	Adarb1	ADARB1	104	0	0	0	-0.00647061	0.0121093	0.0212796	0.000817987	0.814264	0.87368	-0.00995989	0.0880788	0.201202
ENSMUSG00000020263	Appl2	APPL2	55198	0	0	0	-0.00452282	0.0128293	0.0223016	0.00845416	0.00975201	0.029766	-0.00418985	0.277248	0.446658
ENSMUSG00000020265	Sumo3	SUMO3	6612	0	0	0	-0.000576609	0.378931	0.436245	0.00523535	0.00281801	0.0129366	-0.00324786	0.0815884	0.189903
ENSMUSG00000020267	Hint1	HINT1	3094	0	0	0	0.000286428	0.655051	0.702718	-0.00838539	0.00056757	0.005651	-0.00138865	0.413102	0.584419
ENSMUSG00000020271	Fbxw11	FBXW11	23291	0	1	0	0.0136672	0.000315647	0.00174493	-0.00125274	0.631536	0.729116	-0.00485617	0.238285	0.403357
ENSMUSG00000020272	Stk10	STK10	6793	0	0	0	0.00838617	0.00446731	0.00949926	-0.00738458	0.0646849	0.127062	-0.00596782	0.276595	0.445919
ENSMUSG00000020273	Papolg	PAPOLG	64895	0	0	0	-0.00322434	0.0299679	0.0465174	-0.0121803	0.00153357	0.00902985	0.00656463	0.0730546	0.176298
ENSMUSG00000020275	Rel	REL	5966	0	0	0	-0.00492728	0.123717	0.16283	0.00269096	0.594901	0.698927	0.0190708	0.0341541	0.103649
ENSMUSG00000020277	Pfkl	PFKL	5211	0	0	0	-0.0129173	0.000112325	0.0010498	0.00559883	0.0173763	0.0457398	-0.0139126	0.00241687	0.0214147
ENSMUSG00000020280	Pus10	PUS10	150962	0	0	0	-0.00395249	0.00498261	0.0103846	-0.00691818	0.00493296	0.0184397	-0.0055369	0.0586108	0.15071
ENSMUSG00000020282	Rhbdf1	RHBDF1	64285	0	0	0	0.00163793	0.332165	0.389062	0.00864613	0.0158206	0.0427857	-0.0093431	0.0557512	0.145422
ENSMUSG00000020283	Pex13	PEX13	5194	0	0	0	0.00109734	0.245567	0.2975	-0.00702797	0.00330892	0.0141951	0.00613366	0.0287359	0.0918441
ENSMUSG00000020284	1810043G02Rik	CFAP410	755	0	0	0	-0.00508858	0.0347436	0.0530069	0.0129237	0.00749904	0.0244715	0.00111025	0.833752	0.902547
ENSMUSG00000020286	1700093K21Rik	C2orf74	339804	0	0	0	-0.00781881	0.000553934	0.00237519	0.00108443	0.53871	0.649884	0.00165827	0.532508	0.689597
ENSMUSG00000020287	Mpg	MPG	4350	0	0	0	-0.011229	5.48e-05	0.000777806	-0.00727353	0.00181967	0.00989691	-0.00859268	0.00426836	0.0279508
ENSMUSG00000020288	Ahsa2	NA	NA	0	0	0	-0.02168	1.75e-07	0.000105368	-0.000375889	0.674	0.764084	-0.000893752	0.508807	0.667977
ENSMUSG00000020289	Nprl3	NPRL3	8131	0	0	0	-0.00320652	0.076478	0.106462	-0.00664189	0.0420372	0.090874	0.00283976	0.500776	0.661589
ENSMUSG00000020290	Xpo1	XPO1	7514	0	1	0	-0.0151589	9.55e-05	0.000983511	-0.0124591	0.00130411	0.00827217	-0.0126414	0.00517631	0.0307941
ENSMUSG00000020300	Cpeb4	CPEB4	80315	0	0	0	0.0133268	7.08e-05	0.000862847	0.000644123	0.707007	0.791663	0.00699795	0.0250396	0.0834653
ENSMUSG00000020303	Stc2	STC2	8614	1	0	0	0.0322272	1.75e-07	0.000105368	-0.00701275	0.00253086	0.0121193	0.00328167	0.158449	0.302918
ENSMUSG00000020305	Asb3	ASB3	51130	0	0	0	-0.0100187	0.00071722	0.0027531	-0.00640558	0.0290135	0.0679961	0.0126593	0.00924869	0.0428187
ENSMUSG00000020307	Cdc34	CDC34	997	0	0	0	0.00251908	0.015154	0.0256833	-0.00113432	0.432537	0.553019	-0.00285027	0.210203	0.370747
ENSMUSG00000020308	Tpgs1	TPGS1	91978	0	0	0	-0.000377808	0.698831	0.742236	0.0104147	0.00115376	0.00774487	0.0146803	0.00143225	0.017468
ENSMUSG00000020309	Chac2	CHAC2	494143	0	0	0	-0.00577397	0.00885594	0.0164068	-0.0127104	0.00361539	0.0150182	1.49e-05	0.997261	0.998563
ENSMUSG00000020311	Erlec1	ERLEC1	27248	0	0	0	-0.0027713	0.0290765	0.0453058	-0.00348792	0.0892167	0.163433	-0.00136722	0.621559	0.759492
ENSMUSG00000020315	Sptbn1	SPTBN1	6711	0	0	0	-4.59e-05	0.965035	0.971147	0.00869981	0.00272089	0.0126945	-0.00708624	0.0303681	0.0953902
ENSMUSG00000020319	Wdpcp	WDPCP	51057	0	0	0	-0.00223408	0.246528	0.298506	-0.00220494	0.489724	0.606129	0.00420827	0.387073	0.558952
ENSMUSG00000020321	Mdh1	MDH1	4190	0	0	0	-0.00624014	3.74e-05	0.000674487	0.00422043	0.00113496	0.00770107	0.00270601	0.0282246	0.0905212
ENSMUSG00000020325	Fstl3	FSTL3	10272	0	0	0	0.00607933	0.000744231	0.00281641	0.00782789	0.0019743	0.0104131	0.00388951	0.114899	0.24313
ENSMUSG00000020326	Ccng1	CCNG1	900	0	0	0	-0.0126775	6.64e-06	0.000305067	0.00597167	0.00122124	0.00798343	-0.00671633	0.00328986	0.0245495
ENSMUSG00000020328	Nudcd2	NUDCD2	134492	0	0	0	-7.58e-05	0.942958	0.953543	-0.0117637	0.00101836	0.00733082	0.00305458	0.287753	0.456636
ENSMUSG00000020329	Polrmt	POLRMT	5442	0	0	0	-0.00281565	0.0375245	0.0566856	-0.00201206	0.325196	0.447144	-0.0119903	0.00522002	0.0309254
ENSMUSG00000020330	Hmmr	HMMR	3161	0	1	0	-0.00851904	0.000215909	0.00144082	-0.0146618	0.000207692	0.00380321	0.00429673	0.0809981	0.188874
ENSMUSG00000020334	Slc22a4	SLC22A4	6583	0	0	0	-0.00837727	0.000413636	0.00201705	0.00438042	0.0338487	0.0767908	-0.00929056	0.00814816	0.0397675
ENSMUSG00000020346	Mgat1	MGAT1	4245	0	0	0	-0.00706855	0.000354371	0.00184357	-0.00311389	0.0535829	0.109423	0.00185413	0.387168	0.558952
ENSMUSG00000020349	Ppp2ca	PPP2CA	5515	0	1	0	0.00512744	0.0028	0.00675496	-0.000110265	0.953434	0.970745	0.00409531	0.176372	0.327389
ENSMUSG00000020354	Sgcd	SGCD	6444	0	0	0	-0.00221273	0.25697	0.310001	-0.000516634	0.872699	0.914759	-0.0174786	0.00778601	0.0387098
ENSMUSG00000020358	Hnrnpab	HNRNPAB	3182	0	0	0	-0.00642467	0.00100454	0.00337632	-0.0100616	0.00140096	0.00859818	-0.00962121	0.00713759	0.0369941
ENSMUSG00000020359	Phykpl	PHYKPL	85007	0	0	0	-0.00322221	0.0465528	0.0685412	-0.00169959	0.48538	0.60225	-0.0111317	0.0153603	0.0597776
ENSMUSG00000020361	Hspa4	HSPA4	3308	0	0	0	0.00309511	0.277238	0.331446	-0.0112648	0.0421087	0.0909645	-0.0163315	0.0472953	0.130594
ENSMUSG00000020362	Cnot6	CNOT6	57472	0	0	0	-0.0162686	0.000152185	0.00121493	-0.00364398	0.178464	0.282227	0.00962361	0.0340367	0.103421
ENSMUSG00000020364	Zfp354a	AC113348.2	NA	0	0	0	-0.00426828	0.0581723	0.0835624	-0.000594114	0.861939	0.90672	0.00857888	0.125567	0.258315
ENSMUSG00000020366	Mapk9	MAPK9	5601	0	0	0	-0.00400813	0.00169371	0.0047565	-0.000244336	0.847411	0.897169	-0.00989232	0.00204449	0.0200665
ENSMUSG00000020368	Canx	CANX	821	0	0	0	0.00122843	0.0544142	0.0787673	0.00502492	0.00199738	0.0104625	0.00605336	0.00439633	0.0284147
ENSMUSG00000020372	Rack1	RACK1	10399	0	0	0	0.00524757	0.000167745	0.00128104	-0.00739386	0.000330944	0.00458384	-0.000668007	0.597184	0.741698
ENSMUSG00000020375	Rufy1	RUFY1	80230	0	0	0	-0.0112471	0.000741171	0.00281134	-0.0054697	0.0782767	0.148014	-0.0080419	0.0835535	0.193531
ENSMUSG00000020380	Rad50	RAD50	10111	0	1	0	-0.00689349	0.000297203	0.00169492	-0.00951762	0.000622028	0.00589647	-0.00864109	0.00348435	0.0252445
ENSMUSG00000020381	Mrnip	MRNIP	51149	0	0	0	-0.0096257	0.000420367	0.00203512	0.00527592	0.0287411	0.0675289	0.00839427	0.022399	0.0771162
ENSMUSG00000020385	Clk4	CLK4	57396	0	0	0	0.0155665	0.000113636	0.00105263	0.0141788	0.00109406	0.00755797	0.0166879	0.00249484	0.0217372
ENSMUSG00000020386	Sar1b	SAR1B	51128	0	0	0	0.00526356	0.00155297	0.0045	0.00563434	0.00927177	0.028612	0.0159798	0.000941608	0.0150754
ENSMUSG00000020387	Jade2	JADE2	23338	0	0	0	-0.00664023	0.000659353	0.00262092	-0.0104016	0.000900962	0.00691745	-0.00549993	0.0452564	0.126647
ENSMUSG00000020388	Pdlim4	PDLIM4	8572	0	0	0	-0.0178061	4.28e-06	0.000286596	0.0113935	0.000304021	0.00442494	-0.00498715	0.0286051	0.091494
ENSMUSG00000020389	Cdkl3	CDKL3	51265	0	0	0	-0.00243566	0.107637	0.143851	-0.0062354	0.0291017	0.0681244	-0.00919338	0.0307599	0.0962772
ENSMUSG00000020390	Ube2b	UBE2B	7320	0	0	0	-0.00396478	0.000400699	0.00198184	-0.00518345	0.00101626	0.00732116	0.00382902	0.0137819	0.0553793
ENSMUSG00000020392	Cdkn2aipnl	CDKN2AIPNL	91368	0	0	0	-0.0138686	5.07e-06	0.000290004	-0.0136285	6.93e-05	0.00271749	0.00206832	0.201868	0.360783
ENSMUSG00000020393	Kremen1	KREMEN1	83999	0	0	0	-0.00390946	0.0106754	0.0191812	0.0242462	0.000109178	0.00301933	-0.0169306	0.0016604	0.0185689
ENSMUSG00000020397	Med7	MED7	9443	0	0	0	0.00842259	0.00106416	0.00350432	0.00452884	0.0812348	0.151972	0.0100811	0.0193188	0.0697403
ENSMUSG00000020399	Havcr2	HAVCR2	84868	0	0	0	0.00179292	0.342449	0.399634	0.0104587	0.0114542	0.0334959	-0.00941865	0.0786254	0.185675
ENSMUSG00000020400	Tnip1	TNIP1	10318	0	0	0	-0.0154576	0.000568969	0.00240641	-0.0062535	0.10518	0.186511	0.0052559	0.332206	0.505282
ENSMUSG00000020402	Vdac1	VDAC1	7416	0	0	0	-0.000365497	0.567821	0.622031	-0.00338832	0.0153917	0.0418443	-0.00249089	0.161975	0.307704
ENSMUSG00000020407	Upp1	UPP1	7378	0	0	0	-0.00621034	0.00567657	0.0115387	-0.00933206	0.0104322	0.0312281	-0.0183825	0.00358147	0.0255915
ENSMUSG00000020409	Slu7	SLU7	10569	0	0	0	0.0124726	0.000101836	0.00101715	0.00448182	0.032677	0.0746687	0.022416	0.000389423	0.0127314
ENSMUSG00000020412	Ascc2	ASCC2	84164	1	0	0	0.0183188	4.72e-06	0.000286596	-0.027128	1.08e-05	0.00213819	0.00203581	0.320995	0.493374
ENSMUSG00000020413	Hus1	HUS1	3364	0	1	0	-0.00140346	0.334531	0.391553	-0.00271934	0.280432	0.399221	0.00114509	0.753751	0.848211
ENSMUSG00000020415	Pttg1	PTTG1	9232	0	1	0	-0.0186879	5.24e-07	0.000171273	-0.00301021	0.0170244	0.0451177	0.0069614	0.00305813	0.0236854
ENSMUSG00000020420	Zfp607a	NA	NA	0	0	0	-0.00126307	0.242182	0.293959	0.00770367	0.00384913	0.0156426	0.0135343	0.00220201	0.0207041
ENSMUSG00000020422	Tns3	TNS3	64759	0	0	0	0.00646127	0.000218094	0.00144386	0.0110305	0.000215734	0.003845	-0.000762685	0.647988	0.778839
ENSMUSG00000020423	Btg2	BTG2	7832	0	0	0	0.00990818	0.00065271	0.00261175	0.00435433	0.0932459	0.16943	-0.000117213	0.973188	0.986582
ENSMUSG00000020424	Gatsl3	CASTOR1	652968	0	0	0	-0.0073771	0.00452736	0.00960375	-0.00170623	0.582672	0.687497	0.00116793	0.800981	0.881071
ENSMUSG00000020430	Pes1	PES1	23481	0	0	0	0.0128824	3.05e-05	0.000616466	-0.00130475	0.343855	0.467375	0.0126374	0.00110778	0.0159009
ENSMUSG00000020432	Tcn2	TCN2	6948	0	0	0	0.000266035	0.893054	0.911865	0.00243935	0.481292	0.598623	0.00791744	0.155386	0.29901
ENSMUSG00000020439	Smtn	SMTN	6525	0	0	0	0.0040905	0.0116633	0.0206194	0.00862479	0.00548129	0.0198337	0.00773542	0.0432288	0.122562
ENSMUSG00000020440	Arf5	ARF5	381	0	0	0	0.00266657	0.485403	0.541599	0.00198989	0.761067	0.833567	-0.00837342	0.403122	0.575162
ENSMUSG00000020441	2310033P09Rik	C1orf35	79169	0	0	0	-0.000846382	0.547786	0.603435	0.0186322	0.000534528	0.00551305	-0.00380718	0.311451	0.4839
ENSMUSG00000020444	Guk1	GUK1	2987	0	0	0	-0.000630141	0.394448	0.452334	-0.00643937	0.00209773	0.0107518	-0.0084148	0.00343068	0.0249981
ENSMUSG00000020448	Rnf185	RNF185	91445	0	0	0	0.0225044	0.000105157	0.00101949	-0.00165149	0.606875	0.708761	0.0189989	0.00547657	0.0319434
ENSMUSG00000020451	Limk2	LIMK2	3985	0	0	0	0.00510239	0.000739073	0.00280804	0.00339595	0.0258052	0.0623205	0.00327393	0.113381	0.240833
ENSMUSG00000020453	Patz1	PATZ1	23598	0	0	0	-0.00901077	0.0303527	0.0470699	-0.000739811	0.902859	0.935656	0.0077397	0.403593	0.575569
ENSMUSG00000020454	Eif4enif1	EIF4ENIF1	56478	0	0	0	0.000818243	0.585457	0.638904	-0.00144771	0.576823	0.682193	0.00243408	0.533803	0.690501
ENSMUSG00000020455	Trim11	TRIM11	81559	0	0	0	-0.000394516	0.788943	0.822444	-0.000351431	0.890991	0.928065	0.00220118	0.568805	0.719338
ENSMUSG00000020456	Ogdh	OGDH	4967	0	0	0	-0.00191749	0.00447369	0.00951106	0.0101424	8.67e-05	0.00286661	0.00214683	0.106532	0.230426
ENSMUSG00000020457	Drg1	DRG1	4733	0	0	0	-0.0145227	2.62e-06	0.000271226	-0.0132945	5.42e-05	0.00267262	-0.0113673	0.000463549	0.0130286
ENSMUSG00000020458	Rtn4	RTN4	57142	0	0	0	-0.0012413	0.0276134	0.0433092	0.00136203	0.124631	0.213823	-0.0047645	0.00577413	0.0327984
ENSMUSG00000020459	Mtif2	MTIF2	4528	0	0	0	-0.00916106	0.00165892	0.00469056	-0.00831456	0.0201309	0.0514844	0.00209402	0.629028	0.764484
ENSMUSG00000020460	Rps27a	RPS27A	6233	0	1	0	0.00575419	0.000520192	0.00229237	-0.00409723	0.0125129	0.0357662	0.00208922	0.290951	0.460371
ENSMUSG00000020462	Cfap36	CFAP36	112942	0	0	0	-0.0071193	0.00151066	0.00441205	-0.00141336	0.518301	0.631151	-0.00676208	0.0682244	0.167666
ENSMUSG00000020463	Ppp4r3b	PPP4R3B	57223	0	0	0	-0.00273302	0.00750297	0.0143439	-0.00347542	0.0279249	0.0659362	0.0038665	0.0796705	0.187037
ENSMUSG00000020464	Pnpt1	PNPT1	87178	0	0	0	-0.00857835	0.000390734	0.00195797	-0.00844131	0.00259056	0.0122615	-0.0144295	0.00167299	0.0185922
ENSMUSG00000020471	Pold2	POLD2	5425	0	1	0	-0.000422882	0.618262	0.668897	0.0078576	0.00182063	0.00989691	-0.00427142	0.0834004	0.193236
ENSMUSG00000020472	Zkscan17	ZNF496	84838	0	0	0	0.00405796	0.00100463	0.00337632	0.0114654	0.000177622	0.00350602	-0.0102187	0.00112124	0.0159264
ENSMUSG00000020473	Aebp1	AEBP1	165	0	0	0	0.010469	6.94e-05	0.000856163	0.00874258	0.000947028	0.00709073	-0.00490918	0.0382479	0.112168
ENSMUSG00000020474	Polm	POLM	27434	0	0	0	-0.00784826	0.00449694	0.00955162	0.0256336	0.000510052	0.00535812	-0.023296	0.00285175	0.022894
ENSMUSG00000020476	Dbnl	DBNL	28988	0	0	0	0.00531813	0.00160079	0.00458169	0.0127265	0.000535402	0.00551305	0.00824804	0.0110563	0.0478743
ENSMUSG00000020477	Mrps24	MRPS24	64951	0	0	0	0.00385167	0.00727404	0.0140022	0.00285713	0.146937	0.242984	0.00118348	0.666241	0.790397
ENSMUSG00000020482	Ccdc117	CCDC117	150275	0	0	0	0.0184838	0.00197273	0.00526551	0.00664375	0.292934	0.412603	0.0218897	0.0421692	0.120484
ENSMUSG00000020483	Dynll2	DYNLL2	140735	0	1	0	-0.0071576	0.000214161	0.00143191	-0.00214458	0.110979	0.194933	-0.00746099	0.0049625	0.0302456
ENSMUSG00000020484	Xbp1	XBP1	7494	0	0	0	0.033744	0.00017465	0.00130614	0.00665718	0.241588	0.356753	0.0313803	0.00615446	0.0339417
ENSMUSG00000020485	Supt4a	SUPT4H1	6827	0	0	0	0.00143777	0.226514	0.278009	-0.000707058	0.716254	0.79862	0.0155578	0.00187614	0.0193013
ENSMUSG00000020491	2810021J22Rik	NA	NA	0	0	0	-0.011442	0.0011396	0.00364773	-0.00776972	0.0401938	0.0879801	-0.00183532	0.703341	0.816244
ENSMUSG00000020492	Ska2	SKA2	348235	0	1	0	-0.00393478	0.00483907	0.010139	-0.00469176	0.0230673	0.0571809	0.0116419	0.00308899	0.0237723
ENSMUSG00000020493	Prr11	PRR11	55771	0	0	0	-0.00275081	0.0737479	0.103051	0.00195749	0.41275	0.535177	0.00615191	0.114348	0.24253
ENSMUSG00000020495	Smg8	SMG8	55181	0	0	0	0.0002967	0.817746	0.847375	0.000425544	0.849276	0.898094	-0.00591763	0.109974	0.235432
ENSMUSG00000020496	Rnf187	RNF187	149603	0	0	0	0.0336957	0.0253744	0.0401276	-0.00538312	0.803662	0.866449	-0.00203273	0.949841	0.97333
ENSMUSG00000020513	Tubd1	TUBD1	51174	0	0	0	-0.00821286	0.00303645	0.00716539	-0.000735083	0.811884	0.872436	0.0117666	0.0330163	0.101262
ENSMUSG00000020514	Mrpl22	MRPL22	29093	0	0	0	0.00133434	0.0788065	0.109252	-0.00339755	0.0195017	0.0501912	0.00197858	0.27887	0.448495
ENSMUSG00000020515	Cnot8	CNOT8	9337	0	0	0	-0.00353844	0.0081465	0.0153384	-0.00210685	0.242321	0.357374	-0.00350226	0.203497	0.362675
ENSMUSG00000020516	Rps6kb1	RPS6KB1	6198	0	0	0	-0.00308467	0.0203135	0.0330893	0.00335699	0.104782	0.185875	-0.00473597	0.124631	0.257175
ENSMUSG00000020519	Sap30l	SAP30L	79685	0	0	0	-0.00491953	0.000854108	0.00305058	-0.00327639	0.0308451	0.0713874	-0.00152381	0.429658	0.599257
ENSMUSG00000020520	Galnt10	GALNT10	55568	0	0	0	-0.00156295	0.129114	0.169214	0.00952923	0.0013618	0.00845766	0.00482526	0.0792622	0.186538
ENSMUSG00000020521	Rnft1	RNFT1	51136	0	0	0	-0.00147987	0.162981	0.207836	-0.00333384	0.0806078	0.151222	0.000132775	0.958275	0.978634
ENSMUSG00000020522	Mfap3	MFAP3	4238	0	0	0	-0.0020036	0.10396	0.139639	-0.00976089	0.00220664	0.0111256	0.0181268	0.0010896	0.0157785
ENSMUSG00000020523	Fam114a2	FAM114A2	10827	0	0	0	-0.00522089	0.00627465	0.0124544	-0.000654279	0.784019	0.850723	5.31e-05	0.988147	0.993793
ENSMUSG00000020525	Ppm1d	PPM1D	8493	0	0	0	0.00154068	0.303848	0.359093	-0.00516378	0.0685781	0.13322	0.0106509	0.0210285	0.0738612
ENSMUSG00000020526	Znhit3	ZNHIT3	9326	1	0	0	0.00173522	0.196995	0.245748	0.0011558	0.596957	0.700245	0.00998258	0.0156937	0.0607156
ENSMUSG00000020527	Myo19	MYO19	80179	0	0	0	-0.0024512	0.0219017	0.0352995	-0.0123006	0.00044799	0.00510968	-0.00839951	0.00723969	0.0371732
ENSMUSG00000020528	Prpsap2	PRPSAP2	5636	0	0	0	-0.00720233	0.0052958	0.0109121	-0.0169416	0.00180367	0.00986329	-0.00956759	0.0734232	0.176908
ENSMUSG00000020530	Ggnbp2	GGNBP2	79893	0	0	0	0.0220866	0.000718094	0.00275486	0.00085299	0.873884	0.915749	0.0273753	0.0100248	0.0450625
ENSMUSG00000020532	Acaca	ACACA	31	1	0	0	-0.00441137	0.00474484	0.00998363	-0.00382063	0.0717912	0.13825	0.00723544	0.0314267	0.0975901
ENSMUSG00000020534	Shmt1	SHMT1	6470	0	0	0	-0.00114558	0.221331	0.272554	-0.00409493	0.0272052	0.0646909	0.00405463	0.109411	0.234877
ENSMUSG00000020536	Llgl1	LLGL1	3996	0	0	0	-0.0050849	0.00226285	0.00576548	0.0126877	0.00066521	0.0060117	0.00248486	0.358449	0.531242
ENSMUSG00000020537	Drg2	DRG2	1819	0	0	0	0.00731066	0.000476836	0.00218375	-0.00602889	0.00617789	0.0214752	0.00940596	0.00529108	0.031185
ENSMUSG00000020538	Srebf1	SREBF1	6720	0	0	0	-0.0165086	4.28e-06	0.000286596	0.0181859	3.9e-05	0.00243542	-0.000913522	0.604304	0.747453
ENSMUSG00000020541	Tom1l1	TOM1L1	10040	0	0	0	0.00419761	0.00631975	0.0125126	-0.00629045	0.0118416	0.0342783	-0.00559062	0.0838437	0.194007
ENSMUSG00000020544	Cox11	COX11	1353	0	0	0	0.00643701	0.00937937	0.0172221	0.00682439	0.0655518	0.128278	0.00242752	0.619983	0.758776
ENSMUSG00000020546	Stxbp4	STXBP4	252983	0	0	0	-0.014199	9.56e-05	0.000983511	-0.00327936	0.12599	0.215542	0.00707633	0.0411936	0.118386
ENSMUSG00000020547	Bzw2	BZW2	28969	0	0	0	0.00639866	0.000208654	0.00141326	-0.0165884	4.09e-05	0.00243542	-0.000902158	0.581546	0.728963
ENSMUSG00000020549	Elac2	ELAC2	60528	0	0	0	0.0241923	0.000884353	0.00311197	0.0023274	0.711086	0.794549	0.000730027	0.937976	0.966271
ENSMUSG00000020561	Twistnb	TWISTNB	221830	0	0	0	0.0125037	0.000207605	0.00141326	-0.00169696	0.428172	0.549197	-0.0010098	0.750196	0.845791
ENSMUSG00000020564	Atxn7l1	ATXN7L1	222255	0	0	0	-0.00503394	0.00129397	0.0039612	-0.00801479	0.00171888	0.00962592	-0.00642545	0.0189958	0.068966
ENSMUSG00000020570	Sypl	SYPL1	6856	0	0	0	-0.00332836	0.0052236	0.0107886	0.000890493	0.541108	0.651745	-0.0030157	0.193675	0.350204
ENSMUSG00000020571	Pdia6	PDIA6	10130	0	0	0	-0.00129747	0.0160074	0.02695	0.0151018	1.15e-05	0.00213819	0.0116655	0.000186276	0.01114
ENSMUSG00000020572	Nampt	NAMPT	10135	0	0	0	0.00493943	0.000564948	0.00239548	-0.00208947	0.0925589	0.168369	-0.00417689	0.0355615	0.10647
ENSMUSG00000020576	Nbas	NBAS	51594	0	0	0	0.00157477	0.245612	0.297522	-0.00032528	0.884249	0.922891	0.00726208	0.0584133	0.150269
ENSMUSG00000020580	Rock2	ROCK2	9475	0	0	0	0.0034085	0.011744	0.02073	-0.000228001	0.90048	0.93463	-0.00481829	0.109762	0.235387
ENSMUSG00000020583	Matn3	MATN3	4148	0	0	0	-0.00342944	0.0561297	0.0809128	0.00201635	0.461261	0.579108	-0.0102249	0.0344649	0.104169
ENSMUSG00000020585	Laptm4a	LAPTM4A	9741	0	0	0	0.00248721	0.00313033	0.00731407	0.00275119	0.0192019	0.0495757	-0.00448637	0.0133694	0.0541594
ENSMUSG00000020590	Snx13	SNX13	23161	0	0	0	0.00525141	0.00469607	0.00989192	0.00867186	0.00581434	0.0206251	-0.000948347	0.775952	0.864267
ENSMUSG00000020592	Sdc1	SDC1	6382	0	0	0	-0.017269	2.14e-05	0.000533536	0.00769016	0.00303033	0.0134581	-0.0221325	0.000334003	0.0123215
ENSMUSG00000020593	Lpin1	LPIN1	23175	0	1	0	-0.0065126	0.00678514	0.0132413	0.00873996	0.020309	0.051768	0.00152245	0.737907	0.838048
ENSMUSG00000020594	Pum2	PUM2	23369	0	0	0	0.00548635	0.000655245	0.00261549	0.00483684	0.0068646	0.0231352	0.00557387	0.0202515	0.0720613
ENSMUSG00000020605	Hs1bp3	HS1BP3	64342	0	0	0	0.00639614	0.000817483	0.00297645	0.0103908	0.0010083	0.0072868	0.00885689	0.00760044	0.0382889
ENSMUSG00000020608	Smc6	SMC6	79677	0	0	0	-0.0028208	0.00371355	0.00830508	-0.00197588	0.108968	0.192009	-0.00821497	0.0025403	0.0219992
ENSMUSG00000020610	Amz2	AMZ2	51321	0	0	0	0.00137512	0.301107	0.356296	0.000512535	0.817054	0.875607	-0.00521961	0.147242	0.288121
ENSMUSG00000020611	Gna13	GNA13	10672	0	0	0	0.00976972	0.000350437	0.00183394	0.00516664	0.0268811	0.0641567	0.00350027	0.248165	0.414983
ENSMUSG00000020612	Prkar1a	PRKAR1A	5573	0	0	0	0.000113015	0.747313	0.785633	-0.000928728	0.155412	0.253697	0.00553691	0.00121958	0.01628
ENSMUSG00000020614	Fam20a	FAM20A	54757	0	0	0	0.00345443	0.00194747	0.00522368	-0.0230828	1.15e-05	0.00213819	-0.0159859	0.000279458	0.0119222
ENSMUSG00000020621	Rdh14	RDH14	57665	0	0	0	0.0108619	0.0159411	0.0268541	-0.00285974	0.647077	0.742486	-0.00356288	0.703335	0.816244
ENSMUSG00000020623	Map2k6	MAP2K6	5608	0	0	0	-0.0158672	0.000512762	0.00227442	0.0126382	0.0077403	0.0250705	0.00441449	0.407899	0.579528
ENSMUSG00000020628	Trappc12	TRAPPC12	51112	0	0	0	-0.0067259	0.00273872	0.00663511	-0.0114599	0.00295516	0.0132762	-0.000971235	0.791452	0.87531
ENSMUSG00000020629	Adi1	ADI1	55256	0	0	0	-0.0150008	7.74e-05	0.000880175	0.0110093	0.00159502	0.00924366	-0.00286349	0.347107	0.520019
ENSMUSG00000020630	Rnaseh1	RNASEH1	246243	0	0	0	0.00451461	0.00294449	0.00700166	-0.00140911	0.408424	0.531324	-0.00464879	0.0974936	0.21661
ENSMUSG00000020634	Ubxn2a	UBXN2A	165324	0	0	0	0.00180204	0.512415	0.568521	7.06e-05	0.98806	0.992397	-0.00208867	0.767459	0.857899
ENSMUSG00000020638	Cmpk2	CMPK2	129607	0	0	0	0.00739825	0.000694056	0.00270582	0.0111689	0.0010743	0.00750305	-0.009999	0.0067507	0.0358367
ENSMUSG00000020640	Itsn2	ITSN2	50618	0	0	0	0.00416434	0.0680616	0.0960791	0.00133979	0.700931	0.786914	-0.00118564	0.820146	0.893228
ENSMUSG00000020641	Rsad2	RSAD2	91543	0	0	0	0.0141335	7.31e-05	0.000863307	0.0201827	0.000144755	0.00321511	-0.025498	0.00028514	0.0119749
ENSMUSG00000020644	Id2	ID2	3398	0	0	0	-0.0212515	1.91e-05	0.000509333	0.0211481	0.000170192	0.00347184	0.0074947	0.035034	0.105423
ENSMUSG00000020646	Mboat2	MBOAT2	129642	0	0	0	-0.00913512	0.0035771	0.00807099	0.0108567	0.0166017	0.0442917	-0.00437353	0.425654	0.595582
ENSMUSG00000020647	Ncoa1	NCOA1	8648	0	0	0	0.00347901	0.131626	0.172013	0.00300977	0.415636	0.537761	-0.00499382	0.373805	0.545589
ENSMUSG00000020648	Dus4l	DUS4L	11062	1	0	0	0.00970348	0.000610752	0.00251331	-0.0218558	0.000229458	0.00389053	-0.0142409	0.0042257	0.0277595
ENSMUSG00000020649	Rrm2	RRM2	6241	0	1	0	-0.012218	9.62e-07	0.00018653	0.00246388	0.00864886	0.0271449	0.0129414	9.94e-05	0.00984294
ENSMUSG00000020650	Bcap29	BCAP29	55973	0	0	0	-0.0018785	0.222531	0.273855	-0.0187669	0.000598689	0.00579646	-0.0177859	0.00287203	0.0229762
ENSMUSG00000020652	Cenpo	CENPO	79172	0	1	0	-0.00249244	0.158708	0.20318	-0.00456463	0.136271	0.229627	0.00142803	0.73622	0.837546
ENSMUSG00000020653	Klf11	KLF11	8462	0	0	0	0.0179589	1.44e-05	0.000458215	0.0080838	0.00217657	0.0110159	0.00437147	0.0986364	0.218329
ENSMUSG00000020654	Adcy3	ADCY3	109	0	0	0	-0.00192854	0.525699	0.581343	-0.0110562	0.0634201	0.125263	-0.00440805	0.575455	0.724783
ENSMUSG00000020657	Dnajc27	DNAJC27	51277	0	0	0	0.00798265	0.000900874	0.00314495	0.00255656	0.239947	0.355017	-0.0101485	0.0121691	0.0508591
ENSMUSG00000020659	Cbll1	CBLL1	79872	0	0	0	0.0119941	0.000931381	0.00320644	0.00739932	0.0453081	0.0963429	0.0163119	0.00961661	0.0439038
ENSMUSG00000020661	Dnmt3a	DNMT3A	1788	0	0	0	-0.00198659	0.401222	0.458815	-0.00104156	0.795115	0.859665	0.0036244	0.549586	0.703195
ENSMUSG00000020664	Dld	DLD	1738	0	0	0	0.0117592	6.02e-05	0.00079987	-0.0141249	0.000232168	0.00390589	0.00776001	0.00837421	0.0404565
ENSMUSG00000020668	Kif3c	KIF3C	3797	0	0	0	0.00787383	0.000803671	0.00294868	0.0102031	0.00209921	0.0107546	-0.00989254	0.0110435	0.0478372
ENSMUSG00000020669	Sh3yl1	SH3YL1	26751	0	0	0	-0.00608685	0.00366591	0.00821991	-0.00692773	0.0204749	0.0521329	-0.00653623	0.102876	0.225202
ENSMUSG00000020671	Rab10	RAB10	10890	0	0	0	0.0148171	7.28e-05	0.000863307	0.00574644	0.017098	0.0452244	-0.00629112	0.0567696	0.147467
ENSMUSG00000020674	Pxdn	PXDN	7837	0	0	0	-0.00844883	0.000508392	0.00226392	0.00507974	0.0246427	0.0601992	-0.00444148	0.141043	0.27935
ENSMUSG00000020677	Ddx52	DDX52	11056	0	0	0	0.00275802	0.0103227	0.0186445	-0.00163153	0.269848	0.387383	-0.00551867	0.0311838	0.0970993
ENSMUSG00000020680	Taf15	TAF15	8148	1	0	0	0.0126471	0.000818706	0.00297838	-0.0131896	0.00471538	0.0178919	-0.00578552	0.251588	0.418277
ENSMUSG00000020682	Mmp28	MMP28	79148	0	0	0	0.00300537	0.0216756	0.035014	0.00275911	0.165026	0.265601	0.000455763	0.869701	0.92574
ENSMUSG00000020687	Cdc27	CDC27	996	0	1	0	0.00108572	0.244563	0.296378	0.0042792	0.0230554	0.0571639	-0.00477516	0.0677496	0.166858
ENSMUSG00000020689	Itgb3	ITGB3	3690	0	0	0	-0.0209023	0.000113899	0.00105323	0.0254228	0.000402797	0.00484033	-0.00616073	0.204534	0.363785
ENSMUSG00000020691	Mettl2	METTL2A	339175	0	0	0	0.0141272	0.000179283	0.0013209	-0.00613196	0.0275485	0.0652495	-0.0125804	0.00753802	0.0381273
ENSMUSG00000020692	Nle1	NLE1	54475	0	0	0	0.017309	0.000175612	0.00130709	-0.00589696	0.0647263	0.127097	0.00380805	0.376354	0.548097
ENSMUSG00000020694	Tlk2	TLK2	11011	0	0	0	0.012599	0.000548689	0.00235978	-0.00523944	0.0945717	0.171167	-0.0106922	0.0338333	0.103013
ENSMUSG00000020695	Mrc2	MRC2	9902	0	0	0	-0.00628211	0.0397186	0.0596066	0.0186063	0.00470227	0.0178599	-0.000180817	0.978658	0.98876
ENSMUSG00000020696	Rffl	RFFL	117584	0	0	0	-0.0013656	0.618912	0.669537	0.00849214	0.104308	0.185178	-0.0031845	0.654814	0.782685
ENSMUSG00000020697	Lig3	LIG3	3980	0	0	0	0.0057678	0.0024465	0.00611626	0.00322034	0.143147	0.238266	0.00557497	0.100174	0.220935
ENSMUSG00000020700	Map3k3	MAP3K3	4215	0	0	0	0.000478272	0.637028	0.686279	-0.00832476	0.0027799	0.0128441	0.00741895	0.0216749	0.0753378
ENSMUSG00000020705	Ddx42	DDX42	11325	0	0	0	0.00548762	0.000562587	0.00239294	-0.0031368	0.0338339	0.0767908	-0.00406893	0.0567923	0.147478
ENSMUSG00000020706	Ftsj3	FTSJ3	117246	0	0	0	0.0143732	1.13e-05	0.000403558	-0.00735223	0.00122063	0.00798343	0.0153594	0.000404633	0.0127678
ENSMUSG00000020707	Rnf135	RNF135	84282	0	0	0	-0.00652295	0.0179704	0.0297125	-0.00170338	0.658971	0.752208	0.00537312	0.365254	0.537498
ENSMUSG00000020708	Psmc5	PSMC5	5705	0	1	0	0.00423646	0.000887238	0.0031168	-0.000515567	0.639961	0.736682	0.0115045	0.000770455	0.0142621
ENSMUSG00000020712	Tcam1	NA	NA	0	0	0	0.0106388	0.00292421	0.00696212	-0.00721325	0.0993854	0.178041	0.0158392	0.0271728	0.0884121
ENSMUSG00000020715	Ern1	ERN1	2081	0	0	0	0.0192865	5.7e-05	0.000794251	-0.0076358	0.0121706	0.0350357	0.000514988	0.883421	0.934758
ENSMUSG00000020716	Nf1	NF1	4763	1	0	0	0.000723806	0.613511	0.664197	0.00233378	0.355039	0.479476	-0.00644565	0.114612	0.24278
ENSMUSG00000020717	Pecam1	PECAM1	5175	0	0	0	-0.000630136	0.597563	0.650165	-0.00271654	0.21017	0.320664	0.00844812	0.0246266	0.0824731
ENSMUSG00000020718	Polg2	POLG2	11232	0	0	0	-0.00216847	0.063898	0.0908066	0.00572323	0.0127904	0.0363804	0.00451653	0.122963	0.254683
ENSMUSG00000020719	Ddx5	DDX5	1655	0	0	0	-0.00206306	0.00119843	0.00376442	-0.00693385	0.000113199	0.00307044	0.00811941	0.000297815	0.0120245
ENSMUSG00000020720	Psmd12	PSMD12	5718	0	1	0	-0.00465926	0.000349913	0.00183288	-0.00693973	0.000566783	0.005651	0.000132545	0.922965	0.958402
ENSMUSG00000020721	Helz	HELZ	9931	0	0	0	-0.00806227	0.00178033	0.00491956	0.00701939	0.0259449	0.0625522	0.00688103	0.108808	0.233841
ENSMUSG00000020722	Cacng1	CACNG1	786	0	0	0	-0.0012173	0.350128	0.407639	-0.00443686	0.0730542	0.140154	0.00387764	0.25958	0.426911
ENSMUSG00000020728	Cep112	CEP112	201134	0	0	0	-0.00539406	0.0104787	0.01889	-0.0032125	0.268505	0.385851	-0.00385785	0.370668	0.542719
ENSMUSG00000020733	Slc9a3r1	SLC9A3R1	9368	0	0	0	-0.0298766	1.84e-05	0.000502377	0.0112665	0.00507378	0.0187541	0.000462083	0.911813	0.951833
ENSMUSG00000020736	Nt5c	NT5C	30833	0	0	0	-0.00583007	0.00100629	0.00337852	-0.00221461	0.185077	0.290277	-0.00298993	0.230007	0.394081
ENSMUSG00000020737	Jpt1	JPT1	51155	0	0	0	-0.015455	2.59e-05	0.000576451	-0.00360513	0.0476559	0.100052	0.00449068	0.0871796	0.199787
ENSMUSG00000020738	Sumo2	SUMO2	6613	0	0	0	-0.00362932	0.000533479	0.00232761	0.00466672	0.00141163	0.00863709	0.00391727	0.0122675	0.0510885
ENSMUSG00000020739	Nup85	NUP85	79902	0	1	0	-0.00971678	0.000263549	0.00159271	-0.00533911	0.0162368	0.0435928	-0.0100436	0.0063514	0.0346274
ENSMUSG00000020740	Gga3	GGA3	23163	0	0	0	0.00529414	0.00630428	0.0124928	0.00501268	0.0684231	0.133013	0.00590649	0.135624	0.271581
ENSMUSG00000020741	Cluh	CLUH	23277	0	0	0	0.0138226	0.00160315	0.00458615	-0.00120568	0.779398	0.847359	-0.00387152	0.551457	0.704685
ENSMUSG00000020743	Mif4gd	MIF4GD	57409	0	0	0	-0.0133973	0.000605944	0.00249748	0.00503774	0.132992	0.22523	-0.00572458	0.240547	0.405939
ENSMUSG00000020744	Slc25a19	SLC25A19	60386	0	0	0	-0.00310549	0.0124105	0.0217222	0.00879027	0.00198016	0.0104248	0.00721668	0.0204316	0.0724769
ENSMUSG00000020745	Pafah1b1	PAFAH1B1	5048	0	1	0	0.00469432	0.00260446	0.00639627	-0.00594064	0.00878313	0.0274083	0.000512955	0.839103	0.906026
ENSMUSG00000020747	Tmem94	TMEM94	9772	0	0	0	-0.00448359	0.0177471	0.0294039	0.0040968	0.14972	0.246694	0.000486776	0.901904	0.945928
ENSMUSG00000020752	Recql5	RECQL5	9400	0	0	0	-0.00390941	0.00138392	0.00414559	-0.00296177	0.0331692	0.0755888	0.00741562	0.00417701	0.0276054
ENSMUSG00000020755	Sap30bp	SAP30BP	29115	0	0	0	0.000254878	0.773517	0.808305	-0.00291775	0.0888592	0.163012	0.00651571	0.0216128	0.0753078
ENSMUSG00000020766	Galk1	GALK1	2584	0	0	0	-0.00327695	0.00162771	0.00463555	0.000302636	0.767844	0.8385	-0.000977438	0.528442	0.68565
ENSMUSG00000020770	Unk	UNK	85451	0	0	0	0.00100369	0.535694	0.59114	0.0184505	0.00090035	0.0069174	-0.0127158	0.015868	0.0611593
ENSMUSG00000020773	Trim47	TRIM47	91107	0	0	0	0.0181759	0.0013583	0.00409268	-0.000647166	0.904429	0.936833	0.0054001	0.507795	0.667312
ENSMUSG00000020774	Aspa	ASPA	443	0	0	0	-0.00995474	0.000242745	0.00153087	0.00273995	0.148937	0.245677	0.00454702	0.117646	0.247039
ENSMUSG00000020775	Mrpl38	MRPL38	64978	0	0	0	0.0075643	0.000316434	0.00174626	-0.0027474	0.0882133	0.162062	0.00818398	0.00656722	0.0352718
ENSMUSG00000020776	Fbf1	FBF1	85302	0	0	0	-0.00303863	0.0217025	0.0350327	-0.00225118	0.249909	0.365269	-0.00202242	0.478673	0.642499
ENSMUSG00000020777	Acox1	ACOX1	51	0	0	0	0.00634317	0.00531879	0.0109496	0.00855319	0.0153161	0.0416982	0.00682531	0.133143	0.268315
ENSMUSG00000020778	Ten1	TEN1	100134934	0	0	0	-0.00273669	0.105257	0.141132	0.00444486	0.122825	0.211392	-0.00454632	0.271726	0.440366
ENSMUSG00000020780	Srp68	SRP68	6730	0	0	0	0.00240867	0.0198507	0.0324371	0.00195898	0.202878	0.31191	0.00134125	0.542843	0.698159
ENSMUSG00000020781	Tsen54	TSEN54	283989	0	0	0	0.0112339	0.000467483	0.00215385	0.00326375	0.198495	0.306822	-0.00148352	0.680634	0.800828
ENSMUSG00000020783	Ncbp3	NCBP3	55421	0	0	0	-0.0064563	0.00536993	0.011041	-0.000933064	0.742164	0.819304	-0.00914627	0.0602785	0.153617
ENSMUSG00000020785	Camkk1	CAMKK1	84254	0	0	0	-0.015496	0.000239423	0.00151995	0.00307412	0.277143	0.39582	-0.00418619	0.323321	0.495949
ENSMUSG00000020788	Atp2a3	ATP2A3	489	0	0	0	0.0193407	0.000101661	0.00101715	-0.0492814	1.86e-05	0.00215564	-0.00577815	0.185211	0.339391
ENSMUSG00000020790	Ankfy1	ANKFY1	51479	0	0	0	-0.00145177	0.12897	0.169044	-0.00105082	0.489946	0.606338	0.000832405	0.713417	0.822068
ENSMUSG00000020792	Exoc7	EXOC7	23265	0	0	0	-0.0022351	0.0794589	0.110043	0.00444838	0.0505729	0.104678	-0.000613079	0.834599	0.903038
ENSMUSG00000020794	Ube2g1	UBE2G1	7326	0	0	0	0.00683238	0.00193951	0.0052109	0.0022568	0.328187	0.450038	-0.000386026	0.90876	0.950207
ENSMUSG00000020801	Med31	MED31	51003	0	0	0	0.00664683	0.00262701	0.00643533	-0.00190244	0.432554	0.553019	0.00783586	0.0577259	0.149071
ENSMUSG00000020802	Ube2o	UBE2O	63893	0	0	0	0.00511345	0.0031875	0.00740748	0.00788068	0.00502701	0.0186354	0.011806	0.00504851	0.0305372
ENSMUSG00000020803	Txndc17	TXNDC17	84817	0	0	0	0.0041326	0.00180743	0.00496208	-0.00134132	0.326485	0.448539	-0.000353485	0.859441	0.919739
ENSMUSG00000020806	Rhbdf2	RHBDF2	79651	0	0	0	0.0158533	0.000145542	0.00119	0.00123525	0.61478	0.715181	0.00383023	0.313961	0.486155
ENSMUSG00000020807	4933427D14Rik	KIAA0753	9851	0	0	0	-0.0015128	0.491033	0.5474	-0.010027	0.0276226	0.0653844	0.0168017	0.0173639	0.064916
ENSMUSG00000020808	Pimreg	PIMREG	54478	0	0	0	-0.00084044	0.166384	0.21161	-0.0168847	2.25e-05	0.00215564	0.0188945	8.23e-05	0.00936303
ENSMUSG00000020812	1810032O08Rik	NA	NA	0	0	0	0.0308174	2.3e-05	0.000549311	0.0283561	0.000263374	0.0041274	-0.0207452	0.00318951	0.0241362
ENSMUSG00000020814	Mxra7	MXRA7	439921	0	0	0	0.00466519	0.0017347	0.00483906	0.011927	0.000466434	0.0052179	-0.000969563	0.664243	0.789375
ENSMUSG00000020817	Rabep1	RABEP1	9135	0	0	0	0.0227445	0.000106381	0.00102183	-0.00235771	0.471414	0.588946	-0.0180178	0.00714082	0.0369941
ENSMUSG00000020818	Mfsd11	MFSD11	79157	0	0	0	-0.00492896	0.00187229	0.00509249	0.00599264	0.00693925	0.0232869	0.0100049	0.00457229	0.0291892
ENSMUSG00000020821	Kif1c	KIF1C	10749	0	0	0	-0.00325522	0.01707	0.0284128	0.00173934	0.368594	0.49301	-0.0033987	0.255303	0.422244
ENSMUSG00000020823	Sec14l1	SEC14L1	6397	0	0	0	0.00872514	0.000298514	0.00169816	0.000548453	0.737587	0.815975	0.00310551	0.230284	0.394245
ENSMUSG00000020827	Mink1	MINK1	50488	0	0	0	-0.00827151	0.0033986	0.00777444	0.00703332	0.056662	0.114444	-0.010805	0.0520204	0.138753
ENSMUSG00000020828	Pld2	PLD2	5338	0	0	0	-0.00789167	0.00503435	0.0104676	0.00359131	0.305322	0.425339	0.00438713	0.400637	0.572839
ENSMUSG00000020829	Slc46a1	SLC46A1	113235	0	0	0	-0.00457923	0.0056625	0.0115183	-0.00433939	0.0624649	0.123654	-0.00689351	0.0512813	0.137714
ENSMUSG00000020831	0610010K14Rik	C17orf49	124944	0	0	0	0.000369166	0.749833	0.787848	0.00215268	0.298182	0.418132	-0.00693224	0.0478153	0.13165
ENSMUSG00000020832	Eral1	ERAL1	26284	0	0	0	0.0016874	0.130368	0.170583	-0.000750811	0.670823	0.761558	-0.00551862	0.0667956	0.165113
ENSMUSG00000020834	Dhrs13	DHRS13	147015	0	0	0	0.00767354	0.00408278	0.00889149	0.00881827	0.0221748	0.0555463	-0.00749305	0.141814	0.280379
ENSMUSG00000020836	Coro6	CORO6	84940	0	0	0	-0.00048573	0.7721	0.807095	-0.00430222	0.166906	0.267986	0.00605316	0.193734	0.35024
ENSMUSG00000020840	Blmh	BLMH	642	0	0	0	-0.00623068	0.00113593	0.00364516	-0.00774126	0.00358147	0.0149533	-0.00132482	0.614613	0.754185
ENSMUSG00000020841	Cpd	CPD	1362	0	0	0	-0.00430798	0.0130608	0.0226285	0.00619937	0.0292409	0.0683791	-0.000970545	0.783374	0.86915
ENSMUSG00000020843	Timm22	TIMM22	29928	0	0	0	-0.00106212	0.418724	0.476353	-0.000745601	0.738234	0.816525	0.00593015	0.108417	0.233224
ENSMUSG00000020844	Nxn	NXN	64359	0	0	0	-0.00901382	0.00169642	0.00476018	-0.00322414	0.274997	0.393589	-0.00461631	0.298903	0.469833
ENSMUSG00000020846	Rflnb	RFLNB	359845	0	0	0	-0.00283287	0.0722305	0.101289	0.0049684	0.0696424	0.134898	-0.00962354	0.0276664	0.0895455
ENSMUSG00000020849	Ywhae	YWHAE	7531	0	1	0	-0.00168541	0.00762325	0.0145132	0.00136629	0.121809	0.210085	-0.0015172	0.235424	0.400543
ENSMUSG00000020850	Prpf8	PRPF8	10594	0	0	0	0.00579457	0.00625341	0.01242	0.00684338	0.031144	0.07189	0.00796963	0.0753515	0.180075
ENSMUSG00000020857	Nme2	NME2	4831	1	0	0	0.0048629	0.000383042	0.00193722	-0.0055566	0.00152028	0.00897883	0.00164514	0.283432	0.452376
ENSMUSG00000020859	Spag9	SPAG9	9043	0	0	0	0.0029019	0.0664294	0.0939953	0.000528362	0.826722	0.882743	0.00219025	0.547841	0.701822
ENSMUSG00000020863	Luc7l3	LUC7L3	51747	0	0	0	-7.64e-05	0.937297	0.949285	-0.0171585	0.000198601	0.00374299	0.00980007	0.00594703	0.0333696
ENSMUSG00000020864	Ankrd40	ANKRD40	91369	0	0	0	-0.00317215	0.0424294	0.0631264	0.00133551	0.566596	0.67372	-0.00279511	0.430517	0.599746
ENSMUSG00000020868	Xylt2	XYLT2	64132	0	0	0	-0.00362796	0.176776	0.223313	-0.0048297	0.279998	0.398862	-0.00827189	0.227157	0.391308
ENSMUSG00000020869	Lrrc59	LRRC59	55379	0	0	0	0.0185974	0.00222002	0.00569184	-0.00704311	0.285586	0.404796	0.0160875	0.125135	0.257704
ENSMUSG00000020873	Slc35b1	SLC35B1	10237	0	0	0	0.00515637	0.000351923	0.00183417	0.00504414	0.00238531	0.0116708	0.0103592	0.000845017	0.0146299
ENSMUSG00000020876	Snx11	SNX11	29916	0	0	0	0.00138508	0.193792	0.242321	-0.00114657	0.509081	0.622921	0.00908456	0.008825	0.0417354
ENSMUSG00000020877	Scrn2	SCRN2	90507	0	0	0	-0.0100114	0.000473689	0.00217369	0.00630772	0.0187084	0.0485535	-0.0105532	0.0117262	0.0495743
ENSMUSG00000020882	Cacnb1	CACNB1	782	0	0	0	0.00769955	0.00689379	0.0134147	-0.00231667	0.522503	0.63529	-0.00839394	0.151375	0.294284
ENSMUSG00000020883	Fbxl20	FBXL20	84961	0	0	0	0.00392957	0.177745	0.224342	-0.000578499	0.902137	0.935247	0.0111774	0.143861	0.283461
ENSMUSG00000020886	Dlg4	DLG4	1742	0	0	0	-0.00297821	0.0336478	0.0515303	0.0166205	0.000447902	0.00510968	-0.000505668	0.869142	0.925703
ENSMUSG00000020888	Dvl2	DVL2	1856	0	0	0	0.00334853	0.106762	0.142866	0.00820711	0.0340638	0.0771511	0.0139321	0.0205656	0.0727942
ENSMUSG00000020889	Nr1d1	NR1D1	9572	0	0	0	-0.000827551	0.626997	0.676811	0.0249569	0.000380944	0.0047854	-0.0528837	0.000111014	0.00985268
ENSMUSG00000020893	Per1	PER1	5187	0	0	0	0.0129353	0.000600437	0.00248662	0.0283409	0.000249738	0.00400702	0.000434256	0.922195	0.958125
ENSMUSG00000020894	Vamp2	VAMP2	6844	0	0	0	-0.000884147	0.499171	0.555257	-0.0048218	0.0603526	0.120348	-0.010806	0.01267	0.0522136
ENSMUSG00000020895	Tmem107	TMEM107	84314	0	0	0	-0.000299054	0.850065	0.875709	0.00701559	0.0327672	0.0748367	0.0116016	0.0219393	0.0760564
ENSMUSG00000020897	Aurkb	AURKB	9212	0	1	0	-0.0184433	5.83e-05	0.00079987	-0.00680669	0.0167798	0.0446525	0.00608356	0.104754	0.227917
ENSMUSG00000020898	Ctc1	CTC1	80169	0	0	0	-0.00223865	0.119773	0.158204	0.0185491	0.000431206	0.0050284	-0.0123661	0.00762483	0.038342
ENSMUSG00000020899	Pfas	PFAS	5198	0	0	0	-0.0044601	0.000722115	0.00276565	-0.00787016	0.00065743	0.0060117	0.00128577	0.437361	0.606757
ENSMUSG00000020900	Myh10	MYH10	4628	0	0	0	0.00241655	0.242909	0.294747	-0.0018736	0.58267	0.687497	-0.0128792	0.0338049	0.102963
ENSMUSG00000020902	Ntn1	NTN1	9423	0	0	0	-0.00358943	0.0478142	0.0701724	0.00478922	0.10858	0.191396	-0.000124664	0.975508	0.987494
ENSMUSG00000020903	Stx8	STX8	9482	0	0	0	0.00551574	0.0118086	0.0208344	-0.00243824	0.414249	0.536473	-0.00317511	0.478507	0.642426
ENSMUSG00000020910	Adprm	ADPRM	56985	0	0	0	-0.00156795	0.333697	0.39066	-0.00606053	0.0535122	0.109337	0.0157632	0.00598462	0.0334951
ENSMUSG00000020911	Krt19	KRT19	3880	0	0	0	0.00127103	0.449763	0.507075	0.000792447	0.782248	0.849366	-0.00292056	0.501507	0.66204
ENSMUSG00000020914	Top2a	TOP2A	7153	0	1	0	-0.011152	2.1e-06	0.00025025	-0.0104907	4.57e-05	0.0025135	0.011672	0.000148864	0.0107232
ENSMUSG00000020917	Acly	ACLY	47	0	0	0	-0.0117289	4.31e-05	0.000689213	0.0019747	0.167883	0.269107	0.0011891	0.556966	0.708833
ENSMUSG00000020918	Kat2a	KAT2A	2648	0	0	0	0.0243374	0.00280725	0.00676532	0.00283508	0.751404	0.826386	-0.0150671	0.281112	0.450194
ENSMUSG00000020919	Stat5b	STAT5B	6777	0	0	0	-0.00487414	0.0373367	0.0564318	-0.00333106	0.344596	0.468081	-0.00048704	0.924746	0.959469
ENSMUSG00000020921	Tmem101	TMEM101	84336	0	0	0	-0.00765397	8.89e-05	0.000949595	0.00193154	0.0952126	0.172156	-0.000386063	0.804684	0.882945
ENSMUSG00000020922	Lsm12	LSM12	124801	0	0	0	0.00471827	0.00135839	0.00409268	0.00232692	0.125987	0.215542	-0.00157335	0.459248	0.626421
ENSMUSG00000020923	Ubtf	UBTF	7343	0	0	0	0.000261277	0.714747	0.756892	-0.00874981	0.000721678	0.00622851	0.00400944	0.0597524	0.152718
ENSMUSG00000020925	Ccdc43	CCDC43	124808	0	0	0	0.00344132	0.0216572	0.0349891	-0.00210985	0.332424	0.454951	0.000944972	0.76668	0.857784
ENSMUSG00000020929	Eftud2	EFTUD2	9343	0	0	0	-0.00204626	0.00589187	0.0118667	0.00147931	0.137559	0.231355	0.00253469	0.0983986	0.217902
ENSMUSG00000020935	Dcakd	DCAKD	79877	0	0	0	-0.00289171	0.0234876	0.037474	0.00407112	0.0531883	0.108753	-0.000344198	0.899497	0.945161
ENSMUSG00000020936	Nmt1	NMT1	4836	0	0	0	0.00917969	5.47e-05	0.000777352	0.00259844	0.0449907	0.0958105	0.00888918	0.00186425	0.0192482
ENSMUSG00000020937	Plcd3	PLCD3	113026	0	0	0	0.00925141	0.00132316	0.00401778	0.0258179	0.000251399	0.00400835	-0.0137813	0.0102938	0.0457502
ENSMUSG00000020941	Map3k14	MAP3K14	9020	0	0	0	-0.00328032	0.13988	0.181391	6.91e-05	0.98438	0.990615	-0.000160317	0.975766	0.987593
ENSMUSG00000020946	Gosr2	GOSR2	9570	0	0	0	0.00168083	0.0281076	0.0439698	-0.00268947	0.0394941	0.0867535	0.00409198	0.0371334	0.109712
ENSMUSG00000020948	Klhl28	KLHL28	54813	0	0	0	0.00405727	0.0588055	0.0843766	0.00458676	0.184217	0.289285	0.0110234	0.0509114	0.137235
ENSMUSG00000020949	Fkbp3	FKBP3	2287	0	0	0	-0.00587689	0.000113024	0.00105122	-0.00472368	0.00164336	0.0094047	-0.00353702	0.0237801	0.080534
ENSMUSG00000020952	Scfd1	SCFD1	23256	0	0	0	-0.00202389	0.0639781	0.0908866	0.000710544	0.66956	0.760577	0.00878391	0.00869974	0.0413998
ENSMUSG00000020954	Strn3	STRN3	29966	0	0	0	-0.000310208	0.849882	0.875599	-0.00485841	0.118586	0.205673	-0.00140622	0.741679	0.839747
ENSMUSG00000020955	Ap4s1	AP4S1	11154	0	0	0	0.00313463	0.324357	0.380775	-0.00336897	0.528679	0.640755	0.00102645	0.89733	0.943429
ENSMUSG00000020956	Dtd2	DTD2	112487	0	0	0	-0.0055049	0.00203304	0.00536393	-0.00948543	0.002091	0.0107269	-0.0100117	0.00776661	0.0386751
ENSMUSG00000020961	Ston2	STON2	85439	0	0	0	0.00413592	0.12598	0.165505	0.0141583	0.0111806	0.0329061	0.00365738	0.570046	0.720473
ENSMUSG00000020962	Gtf2a1	GTF2A1	2957	0	0	0	-0.00229812	0.0165616	0.0277279	-0.0230627	2.26e-05	0.00215564	0.00624277	0.0142343	0.0566794
ENSMUSG00000020964	Sel1l	SEL1L	6400	0	0	0	0.00505464	0.000568881	0.00240641	-0.00563136	0.00245857	0.0118525	0.00817609	0.00277911	0.022669
ENSMUSG00000020973	Dnaaf2	DNAAF2	55172	0	0	0	-0.0100225	0.0043979	0.00938631	-0.0043837	0.306801	0.426899	-0.0106975	0.119547	0.25002
ENSMUSG00000020974	Pole2	POLE2	5427	0	1	0	-0.0215534	0.000139336	0.00116777	-0.000330663	0.920141	0.947841	-0.00112864	0.818812	0.892285
ENSMUSG00000020978	Klhdc2	KLHDC2	23588	0	0	0	0.00507478	0.1323	0.172736	0.00544454	0.319864	0.441298	0.00346884	0.665129	0.789841
ENSMUSG00000020982	Nemf	NEMF	9147	0	0	0	0.00148578	0.151335	0.194897	-0.00495741	0.0170568	0.045169	-0.000319017	0.897205	0.943384
ENSMUSG00000020986	Sec23a	SEC23A	10484	0	0	0	-0.00618361	2.55e-05	0.000573119	-0.000869697	0.188108	0.294184	0.005773	0.00114764	0.0159539
ENSMUSG00000020988	L2hgdh	L2HGDH	79944	0	0	0	-0.00622415	0.0208431	0.0338364	-0.00988174	0.0308641	0.0714024	-3.97e-05	0.994477	0.997266
ENSMUSG00000020993	Trappc6b	TRAPPC6B	122553	0	0	0	0.00985349	0.0037743	0.00840117	0.00247729	0.530893	0.643097	-0.00150938	0.797667	0.879045
ENSMUSG00000020994	Pnn	PNN	5411	0	0	0	0.00153741	0.0821222	0.113313	-0.00616857	0.00331276	0.0141951	0.00790471	0.00600358	0.0335684
ENSMUSG00000021000	Mia2	MIA2	4253	0	0	0	0.0116893	0.000399038	0.00197704	-0.00819879	0.00969038	0.0296043	0.00115157	0.747449	0.844475
ENSMUSG00000021003	Galc	GALC	2581	0	0	0	-0.00180349	0.315256	0.371195	0.0104034	0.00930201	0.0286678	-0.0045105	0.331223	0.50462
ENSMUSG00000021007	Spata7	SPATA7	55812	0	0	0	0.00233093	0.249585	0.302035	0.00620289	0.0937608	0.170231	0.00247303	0.621742	0.759492
ENSMUSG00000021009	Ptpn21	PTPN21	11099	1	0	0	0.00299059	0.0489363	0.0716813	0.00569894	0.0352392	0.0792016	-0.00724105	0.0631285	0.15834
ENSMUSG00000021012	Zc3h14	ZC3H14	79882	0	0	0	0.00988286	0.00065507	0.00261549	0.0111266	0.00273636	0.0127407	0.00723294	0.068601	0.168303
ENSMUSG00000021013	Ttc8	TTC8	123016	0	0	0	-0.00989398	0.00351906	0.00798394	0.00439053	0.273789	0.392205	0.00775262	0.208888	0.369233
ENSMUSG00000021018	Polr2h	POLR2H	5437	0	0	0	0.00607771	0.000251399	0.00155797	0.00279174	0.0318913	0.0732083	0.00574605	0.00863479	0.0412623
ENSMUSG00000021022	Ppp2r3c	PPP2R3C	55012	0	0	0	-0.0031833	0.014611	0.0248957	0.000400752	0.823048	0.879887	-0.00294678	0.291334	0.460658
ENSMUSG00000021023	1110008L16Rik	KIAA0391	9692	0	0	0	-0.00460105	0.0630434	0.0897818	0.00113603	0.762951	0.835071	-0.00389236	0.495463	0.657619
ENSMUSG00000021024	Psma6	PSMA6	5687	0	1	0	0.00420239	0.000404895	0.00199226	-0.00337834	0.0056847	0.020325	0.0102979	0.000491084	0.0131824
ENSMUSG00000021025	Nfkbia	NFKBIA	4792	0	0	0	0.00505008	0.00895017	0.0165412	0.0292755	0.00011958	0.00307112	0.0162906	0.00397963	0.0270291
ENSMUSG00000021027	Ralgapa1	RALGAPA1	253959	0	0	0	0.000149815	0.94194	0.952767	-0.00388364	0.291925	0.411653	-0.0022548	0.674228	0.79631
ENSMUSG00000021028	Mbip	MBIP	51562	0	0	0	0.000240597	0.877978	0.899146	0.00207902	0.449431	0.568623	0.00274201	0.506319	0.666226
ENSMUSG00000021033	Gstz1	GSTZ1	2954	0	0	0	0.00893063	0.00111853	0.00361265	-0.00920204	0.0072215	0.0239253	0.000345546	0.92611	0.960373
ENSMUSG00000021036	Sptlc2	SPTLC2	9517	0	0	0	-0.00551575	0.000391259	0.00195886	-0.00298544	0.0277237	0.0655783	-0.000758387	0.652351	0.781241
ENSMUSG00000021037	Ahsa1	AHSA1	10598	0	0	0	-0.00163693	0.0288593	0.044998	-0.0018197	0.124011	0.212889	0.0115944	0.000718619	0.0140407
ENSMUSG00000021038	Vipas39	VIPAS39	63894	0	0	0	-0.0041116	0.00976722	0.0177897	-0.000739526	0.724723	0.805639	0.00580758	0.09715	0.216022
ENSMUSG00000021039	Snw1	SNW1	22938	0	0	0	0.00796339	0.000173951	0.00130577	-0.000869466	0.501122	0.61597	0.0189803	0.000229983	0.0116087
ENSMUSG00000021040	Slirp	SLIRP	81892	0	0	0	-0.00146438	0.287579	0.342129	-0.00687517	0.0169406	0.0449376	0.00525654	0.156013	0.299497
ENSMUSG00000021044	Adck1	ADCK1	57143	0	0	0	0.00132518	0.351301	0.408797	-0.00134888	0.573746	0.679679	-0.00196667	0.585194	0.731892
ENSMUSG00000021048	Mthfd1	MTHFD1	4522	0	0	0	0.00494848	0.000184528	0.00133249	-0.000530738	0.515625	0.628864	0.00390261	0.0128252	0.0526633
ENSMUSG00000021051	Ppp2r5e	PPP2R5E	5529	0	1	0	0.00081975	0.605119	0.656852	-0.0040149	0.169353	0.271003	0.00213705	0.604003	0.747325
ENSMUSG00000021054	Sgpp1	SGPP1	81537	0	0	0	-0.00262173	0.28344	0.337766	0.005979	0.167643	0.268852	-0.00447687	0.467936	0.633796
ENSMUSG00000021065	Fut8	FUT8	2530	0	0	0	0.00165087	0.181807	0.228881	0.011884	0.00128505	0.00821744	-0.0186303	0.00111696	0.0159264
ENSMUSG00000021067	Sav1	SAV1	60485	0	0	0	-0.00809602	0.000597815	0.00248132	0.00200911	0.294637	0.41434	0.00306836	0.29037	0.459642
ENSMUSG00000021068	Nin	NIN	51199	0	0	0	-0.000550969	0.647602	0.696032	0.000837398	0.688149	0.775809	4.99e-05	0.987273	0.993439
ENSMUSG00000021070	Bdkrb2	BDKRB2	624	0	0	0	0.0140919	0.000377273	0.00191652	0.0298128	0.00017465	0.0034869	-0.00392757	0.367969	0.539964
ENSMUSG00000021072	Tmx1	TMX1	81542	0	0	0	-0.00772886	6.73e-05	0.000840515	0.00452254	0.00312002	0.013707	-0.0010957	0.463932	0.630289
ENSMUSG00000021076	Actr10	ACTR10	55860	0	0	0	0.00233798	0.0101538	0.0183943	0.00097426	0.424237	0.545473	0.00790491	0.00375621	0.0262256
ENSMUSG00000021079	Timm9	TIMM9	26520	0	0	0	-0.00191073	0.131499	0.171886	-0.0263797	7.5e-05	0.00274839	0.000806207	0.788187	0.872965
ENSMUSG00000021094	Dhrs7	DHRS7	51635	1	0	0	0.00440403	0.0116939	0.020665	-0.0308234	7.58e-05	0.00274839	-0.000850398	0.808834	0.885995
ENSMUSG00000021096	Ppm1a	PPM1A	5494	0	0	0	0.00595145	0.00251635	0.00624447	-0.00658025	0.0147997	0.0405919	-0.01207	0.00643575	0.0348934
ENSMUSG00000021102	Glrx5	GLRX5	51218	0	0	0	0.00195439	0.0232889	0.0371946	-0.00526847	0.00403837	0.0161535	-0.0031512	0.119597	0.250075
ENSMUSG00000021103	Mnat1	MNAT1	4331	0	1	0	0.0102777	0.00030507	0.00171295	-0.00378187	0.0821989	0.153132	0.0042772	0.171336	0.320643
ENSMUSG00000021109	Hif1a	HIF1A	3091	0	0	0	0.0180208	0.00108706	0.00354214	0.00784929	0.144514	0.239879	-0.0168865	0.0509944	0.137409
ENSMUSG00000021111	Papola	PAPOLA	10914	0	0	0	-0.00577188	0.00477465	0.0100325	-0.0101732	0.00460192	0.017625	-0.00197041	0.594582	0.739591
ENSMUSG00000021112	Mpp5	MPP5	64398	0	0	0	-0.00060732	0.616001	0.666577	0.0137043	0.000936276	0.00707464	-0.00835268	0.0274245	0.0890284
ENSMUSG00000021113	Snapc1	SNAPC1	6617	0	0	0	0.00358727	0.0264379	0.0416254	0.00189786	0.420414	0.541904	-0.0115915	0.0110912	0.047989
ENSMUSG00000021114	Atp6v1d	ATP6V1D	51382	0	0	0	0.00178128	0.190334	0.238439	0.0115983	0.00193304	0.0102522	-0.00966916	0.0186042	0.0680845
ENSMUSG00000021115	Vrk1	VRK1	7443	0	1	0	-0.0016214	0.0481587	0.0706509	-0.00590814	0.00266014	0.0124977	0.00599051	0.012088	0.0506176
ENSMUSG00000021116	Eif2s1	EIF2S1	1965	0	0	0	0.00432106	0.00148759	0.00436247	-0.0125203	0.000249388	0.00400702	-0.00235307	0.254899	0.421852
ENSMUSG00000021118	Plek2	PLEK2	26499	0	0	0	-0.00599146	0.00728357	0.0140158	0.0117188	0.00468409	0.0178323	-0.000166786	0.968684	0.984344
ENSMUSG00000021120	Pigh	PIGH	5283	0	0	0	-0.0093418	0.000181469	0.00132949	-0.00677345	0.00353243	0.0148355	0.0106272	0.00301267	0.0235096
ENSMUSG00000021124	Vti1b	VTI1B	10490	0	0	0	0.00233086	0.0497258	0.0726889	0.00211805	0.253111	0.368924	-0.0126442	0.00283505	0.0227949
ENSMUSG00000021127	Zfp36l1	ZFP36L1	677	0	0	0	-0.00431565	0.00366792	0.00822281	0.0033015	0.0844612	0.156552	0.000188126	0.941291	0.96864
ENSMUSG00000021131	Erh	ERH	2079	1	0	0	-0.000315649	0.705508	0.748355	-0.0108331	0.000591696	0.00575595	0.014248	0.000942745	0.0150754
ENSMUSG00000021133	Susd6	SUSD6	9766	0	0	0	0.012433	0.00480455	0.0100759	0.00387519	0.468637	0.586244	-0.00917919	0.269325	0.437466
ENSMUSG00000021134	Srsf5	SRSF5	6430	0	0	0	-0.000169341	0.828894	0.857606	0.000802092	0.557271	0.66672	0.0215986	0.00017771	0.01114
ENSMUSG00000021139	Gm20498	SYNJ2BP-COX16	100529257	0	0	0	0.00223833	0.350976	0.408502	-0.00235064	0.561491	0.670345	0.0136169	0.0516227	0.138094
ENSMUSG00000021140	Pcnx	PCNX1	22990	0	0	0	-0.000893723	0.556958	0.612124	0.00209622	0.428534	0.549537	-0.0132405	0.0104024	0.0459653
ENSMUSG00000021143	Pacs2	PACS2	23241	0	0	0	0.00391766	0.00675577	0.0131955	0.0165964	0.000294406	0.00435779	-0.0056974	0.0671089	0.165708
ENSMUSG00000021144	Mta1	MTA1	9112	0	0	0	0.0013839	0.402417	0.459997	0.00331233	0.255183	0.371223	-0.006003	0.181701	0.33435
ENSMUSG00000021147	Wdr37	WDR37	22884	0	0	0	0.00833394	0.00389231	0.00858288	0.00131551	0.69533	0.782282	0.0138118	0.0243245	0.0817966
ENSMUSG00000021149	Gtpbp4	GTPBP4	23560	1	0	0	0.0227958	6.03e-06	0.000301237	-0.00488221	0.0215074	0.0542485	0.0041335	0.140482	0.278481
ENSMUSG00000021156	Zmynd11	ZMYND11	10771	0	0	0	0.00337438	0.00203138	0.00536326	-0.0022127	0.0808109	0.151529	0.000774657	0.647932	0.778839
ENSMUSG00000021171	Esyt2	ESYT2	57488	0	0	0	0.00501999	0.00987351	0.0179547	0.0104666	0.00489406	0.0183447	-0.01712	0.00354755	0.0254445
ENSMUSG00000021175	Cdca7l	CDCA7L	55536	0	0	0	-0.0199029	0.000122028	0.00108892	-0.020295	0.000792832	0.00653602	-0.017881	0.00505087	0.0305372
ENSMUSG00000021176	Efcab11	EFCAB11	90141	0	0	0	-0.00764819	0.0019014	0.0051411	-0.016363	0.000949038	0.00709073	0.00440825	0.262722	0.430346
ENSMUSG00000021177	Tdp1	TDP1	55775	0	0	0	-0.00231167	0.102168	0.137425	-0.00608181	0.0242701	0.0595265	0.0162086	0.00251906	0.0218734
ENSMUSG00000021178	Psmc1	PSMC1	5700	0	1	0	-0.00203839	0.00892282	0.016512	-0.00648414	0.00102858	0.00735897	0.00175083	0.272021	0.440609
ENSMUSG00000021179	Nrde2	NRDE2	55051	0	0	0	-0.00500284	0.0206992	0.0336314	-0.00197748	0.520169	0.633191	0.022305	0.00257911	0.0220239
ENSMUSG00000021182	Ccdc88c	CCDC88C	440193	0	0	0	0.00704901	0.00396084	0.00868712	0.017598	0.00114572	0.00773451	-0.0108542	0.0332059	0.101573
ENSMUSG00000021185	Dglucy	DGLUCY	80017	0	0	0	-0.0227398	1.48e-05	0.000458215	-0.00191264	0.353775	0.477996	-0.016388	0.00179519	0.0189862
ENSMUSG00000021186	Fbln5	FBLN5	10516	0	0	0	0.0188507	6.98e-05	0.000856163	-0.0306159	8.54e-05	0.00285166	-0.0131682	0.00764895	0.0383855
ENSMUSG00000021188	Trip11	TRIP11	9321	0	0	0	0.00101904	0.509066	0.56497	0.00489697	0.0953392	0.172249	0.0109689	0.0236295	0.0801429
ENSMUSG00000021189	Atxn3	ATXN3	4287	0	0	0	0.000705971	0.318634	0.374825	-0.00153799	0.216017	0.327922	0.00448655	0.0336511	0.102631
ENSMUSG00000021190	Lgmn	LGMN	5641	0	0	0	0.00126738	0.196803	0.245574	0.00358906	0.0514891	0.106189	-0.00249879	0.312139	0.484582
ENSMUSG00000021192	Golga5	GOLGA5	9950	0	0	0	0.00194288	0.117581	0.155541	-0.00779776	0.00528295	0.0193509	-0.00542939	0.0957489	0.213605
ENSMUSG00000021193	Pitrm1	PITRM1	10531	0	0	0	0.00613659	0.000708217	0.00273347	-0.00178551	0.247915	0.36319	-0.00617996	0.0231719	0.0790719
ENSMUSG00000021196	Pfkp	PFKP	5214	0	0	0	-0.00270358	0.0123671	0.0216628	0.000412134	0.778007	0.846609	-0.0160317	0.000656818	0.0138891
ENSMUSG00000021200	Asb2	ASB2	51676	0	0	0	0.00279029	0.215608	0.266337	0.000190471	0.958745	0.973639	0.00797188	0.177185	0.328099
ENSMUSG00000021203	Otub2	OTUB2	78990	1	0	0	0.0342128	3.5e-07	0.000125125	-0.0232163	6.58e-05	0.00271749	-0.0137542	0.00183767	0.019165
ENSMUSG00000021208	Ifi27l2b	NA	NA	0	0	0	0.00494218	0.00751285	0.0143556	0.00249948	0.303972	0.424058	-0.00574747	0.136638	0.273198
ENSMUSG00000021213	Akr1c13	NA	NA	0	0	0	-0.00567516	0.00725498	0.0139726	-0.00681622	0.0337567	0.0766528	0.00723598	0.105197	0.228533
ENSMUSG00000021215	Net1	NET1	10276	0	0	0	-0.00505682	0.00857019	0.016007	0.0171832	0.00079458	0.00653951	-0.00612354	0.13409	0.269641
ENSMUSG00000021217	Tshz3	TSHZ3	57616	0	0	0	-0.00557688	0.0141948	0.0242679	0.00934263	0.0171245	0.0452434	-0.0010887	0.815334	0.889901
ENSMUSG00000021218	Gdi2	GDI2	2665	0	0	0	-0.00104754	0.0777609	0.107986	0.00352319	0.00605393	0.0211795	-0.00380217	0.0232641	0.0792794
ENSMUSG00000021222	Dcaf4	DCAF4	26094	0	0	0	-0.0137529	0.00126958	0.00391482	0.00245881	0.539801	0.65072	-0.016929	0.0215476	0.0752228
ENSMUSG00000021224	Numb	NUMB	8650	0	0	0	-0.00322283	0.0512084	0.0745608	0.00924158	0.00697544	0.0233672	0.00821321	0.0554691	0.144845
ENSMUSG00000021226	Acot2	ACOT2	10965	1	0	0	0.0467544	2.1e-06	0.00025025	-0.0381497	7.86e-05	0.00274839	-0.0226031	0.00215612	0.0204867
ENSMUSG00000021234	Fam161b	FAM161B	145483	0	0	0	-0.00235057	0.126473	0.166095	-0.000475315	0.844965	0.895286	0.00827058	0.0500468	0.135768
ENSMUSG00000021235	Coq6	COQ6	51004	0	0	0	-7.12e-05	0.951583	0.960482	0.00121925	0.55104	0.661475	0.00235748	0.447562	0.616544
ENSMUSG00000021236	Entpd5	ENTPD5	957	1	0	0	-0.00518551	0.0206014	0.0334964	-0.0201243	0.00103706	0.0073637	-0.0135196	0.0209629	0.0737439
ENSMUSG00000021238	Aldh6a1	ALDH6A1	4329	0	0	0	-0.00392681	0.134542	0.175403	-0.000686858	0.868997	0.912216	-0.0035365	0.572936	0.722883
ENSMUSG00000021240	Abcd4	ABCD4	5826	0	0	0	-0.007784	0.000656469	0.00261946	0.016963	0.000279458	0.00423444	-0.00539082	0.0817884	0.190213
ENSMUSG00000021241	Isca2	ISCA2	122961	0	0	0	-0.00795807	0.000632955	0.00256591	-0.00424902	0.0491277	0.102297	-0.0047092	0.123307	0.255179
ENSMUSG00000021242	Npc2	NPC2	10577	0	0	0	-0.000791999	0.174914	0.221278	0.00609501	0.000969406	0.00716872	6.26e-05	0.964411	0.981687
ENSMUSG00000021243	Fcf1	FCF1	51077	0	0	0	0.00629656	0.000574301	0.00241624	-0.00895126	0.00109056	0.00755657	0.00274339	0.225862	0.389914
[truncated: 9,441 more rows]

## Sheet: 2 - All Myoblasts PCA & DE
Gene_ID	Gene_symbol	ATF4_DDIT3_target	PC1_weight	PC1_js_pval	PC1_js_padj	PC2_weight	PC2_js_pval	PC2_js_padj	PC3_weight	PC3_js_pval	PC3_js_padj	DMSO_Lb_vs_Luc_Log2FC	DMSO_Lb_vs_Luc_pval	DMSO_Lb_vs_Luc_padj	DMSO_mLb_vs_Luc_Log2FC	DMSO_mLb_vs_Luc_pval	DMSO_mLb_vs_Luc_padj	DMSO_NDI1_vs_Luc_Log2FC	DMSO_NDI1_vs_Luc_pval	DMSO_NDI1_vs_Luc_padj	Luc_Pier_vs_DMSO_Log2FC	Luc_Pier_vs_DMSO_pval	Luc_Pier_vs_DMSO_padj	Luc_Anti_vs_DMSO_Log2FC	Luc_Anti_vs_DMSO_pval	Luc_Anti_vs_DMSO_padj	Luc_Oligo_vs_DMSO_Log2FC	Luc_Oligo_vs_DMSO_pval	Luc_Oligo_vs_DMSO_padj	Lb_Pier_vs_DMSO_Log2FC	Pier_Lb_interaction_pval	Pier_Lb_interaction_padj	mLb_Pier_vs_DMSO_Log2FC	Pier_mLb_interaction_pval	Pier_mLb_interaction_padj	NDI1_Pier_vs_DMSO_Log2FC	Pier_NDI1_interaction_pval	Pier_NDI1_interaction_padj	Lb_Anti_vs_DMSO_Log2FC	Anti_Lb_interaction_pval	Anti_Lb_interaction_padj	mLb_Anti_vs_DMSO_Log2FC	Anti_mLb_interaction_pval	Anti_mLb_interaction_padj	Lb_Oligo_vs_DMSO_Log2FC	Oligo_Lb_interaction_pval	Oligo_Lb_interaction_padj
ENSMUSG00000000001	Gnai3	0	0.00137019	0.0718056	0.0944296	-0.00500826	0.00131519	0.00406258	-0.00238634	0.159062	0.260764	0.00653085	0.852012	0.993609	-0.0107937	0.737002	0.991368	-0.0180066	0.68843	0.987136	0.249645	0.000126002	0.000325296	-0.0641671	0.327972	0.39993	0.145615	0.0238933	0.0485279	-0.0716224	0.000394743	0.00147539	-0.118638	4.53183e-05	0.000221308	-0.0925486	0.00128441	0.00447267	-0.0303585	0.711303	0.785174	-0.172854	0.18877	0.335352	0.0105411	0.0679768	0.314521
ENSMUSG00000000028	Cdc45	0	-0.013993	8.34725e-08	2.94787e-07	0.0122729	8.34725e-08	1.29021e-06	0.000271812	0.885658	0.928198	-0.0521739	0.131766	0.855892	-0.0463953	0.141735	0.817644	-0.0567948	0.240326	0.830082	-1.23952	1.44232e-43	3.09633e-42	-0.969056	5.38008e-29	6.76264e-28	-0.822759	1.51133e-22	2.42685e-21	-0.025641	5.08739e-24	1.56663e-22	-0.18446	1.07529e-18	2.82476e-17	-0.163857	3.94225e-16	7.22082e-15	0.469748	3.59549e-34	1.33759e-32	-0.40973	9.07056e-07	1.12248e-05	-0.437811	0.000197323	0.00514972
ENSMUSG00000000031	H19	0	0.00425074	0.102383	0.130559	-0.00202764	0.679455	0.753769	0.028042	2.91319e-05	0.000199298	-0.548654	4.34388e-06	0.000515116	-0.0252575	0.239996	0.888516	0.0278477	0.514156	0.957439	-0.580607	1.25344e-07	4.74256e-07	0.955732	3.53597e-22	3.41042e-21	-0.430745	3.04141e-05	0.000113853	0.896737	1.53374e-22	4.4486e-21	0.379463	6.38555e-11	7.36922e-10	-0.0240654	0.000328694	0.0013116	-0.463615	6.19034e-20	1.09858e-18	0.586585	0.00313409	0.0137572	-0.228041	0.0466373	0.25371
ENSMUSG00000000056	Narf	0	-0.0237235	8.34725e-08	2.94787e-07	0.0149223	0.000125876	0.00056264	-0.0160335	0.000255676	0.00123597	0.0158566	0.440292	0.975922	-0.0213123	0.218825	0.884213	-0.0858124	0.068468	0.530021	-2.31875	1.60572e-29	2.21861e-28	-2.64504	4.00368e-34	5.97261e-33	-1.17675	5.43512e-12	4.32033e-11	-0.145031	2.97268e-17	5.59023e-16	-0.337526	1.70813e-14	3.00025e-13	-0.389713	9.29845e-12	1.11721e-10	0.529921	1.6013e-32	5.48058e-31	-0.825154	1.38604e-11	3.98162e-10	-0.363516	8.65447e-05	0.00267196
ENSMUSG00000000058	Cav2	0	-0.026481	8.34725e-08	2.94787e-07	-0.00436951	0.03614	0.0678134	0.00427618	0.0784988	0.147898	-0.00865168	0.638443	0.984555	-0.0169507	0.386121	0.940905	0.0064195	0.921088	0.992809	-2.68766	3.80993e-34	6.20097e-33	-2.54685	2.56044e-32	3.61266e-31	-1.46471	1.33887e-15	1.41556e-14	-0.274806	3.10538e-18	6.42476e-17	-0.397976	1.39166e-16	3.03103e-15	-0.240523	2.67015e-16	4.95902e-15	-0.6994	1.13734e-11	1.00226e-10	-1.67568	0.000483055	0.00283236	-1.38498	0.261733	0.620569
ENSMUSG00000000078	Klf6	0	0.0359147	8.34725e-08	2.94787e-07	-0.0156611	8.34725e-08	1.29021e-06	0.0543754	8.34725e-08	1.605e-06	0.101226	0.0247981	0.442633	-0.000986767	0.978349	0.998983	0.050767	0.284072	0.863649	2.21578	1e-307	3.23757e-305	3.24366	1e-307	2.92171e-305	0.272701	1.33154e-06	6.15137e-06	-0.115893	8.4469e-193	1.01185e-189	-0.128974	1.3685e-194	2.73221e-191	0.0042709	2.0877e-141	1.00034e-138	-0.987853	1e-307	1.089e-304	0.736454	4.99725e-230	1.9954e-226	-0.24046	5.88868e-11	9.53249e-09
ENSMUSG00000000085	Scmh1	0	0.000714541	0.442673	0.493603	0.0176124	8.34725e-08	1.29021e-06	-0.00274404	0.1928	0.30422	0.00154267	0.950301	0.995105	-0.0226526	0.298089	0.916473	0.033495	0.445858	0.93416	-0.0229407	0.789942	0.834454	0.274257	0.00843579	0.0152855	0.137509	0.175419	0.264021	0.187419	0.124453	0.215749	0.374129	0.00339099	0.0105563	0.114995	0.325945	0.464807	0.925711	1.67766e-06	7.77272e-06	0.506728	0.0696178	0.163232	0.0801066	0.475383	0.797337
ENSMUSG00000000088	Cox5a	0	0.00209941	0.00230267	0.00387793	0.00339529	0.00853932	0.0199199	-0.00855365	1.08514e-06	1.15546e-05	-0.0478974	0.166746	0.886586	-0.0640225	0.069314	0.674865	-0.157734	0.00422454	0.0999947	0.0238193	0.661059	0.722785	0.0536483	0.322193	0.393952	0.286937	5.77674e-08	3.13546e-07	0.147128	0.101482	0.182998	0.136655	0.130799	0.227663	0.165708	0.0908018	0.17124	0.376035	1.97177e-05	7.68623e-05	0.187587	0.0693765	0.162891	0.342579	0.37006	0.718433
ENSMUSG00000000126	Wnt9a	0	-0.00435805	0.00891703	0.0136857	0.0267137	8.34725e-08	1.29021e-06	-0.00443623	0.216293	0.333189	-0.0132409	0.411326	0.975922	0.00624716	0.623018	0.981833	0.0101493	0.732276	0.990149	-0.670894	0.000715504	0.00163351	-0.13199	0.471494	0.545124	-0.148733	0.401322	0.511876	0.0982739	0.00181408	0.00575347	0.0751657	0.00236145	0.00772679	-0.279823	0.120257	0.214873	1.65696	1.53092e-11	1.33277e-10	0.342425	0.0209712	0.0642491	-0.137675	0.820966	0.949202
ENSMUSG00000000127	Fer	0	-0.00279763	0.0135575	0.0201621	-0.0113503	1.02671e-05	6.82518e-05	0.00167219	0.492657	0.619746	-0.0158677	0.552361	0.981299	-0.0177406	0.447394	0.953544	-0.0680391	0.17895	0.7736	-0.491354	8.8489e-07	3.02773e-06	-0.235039	0.0132363	0.0230294	-0.106942	0.257155	0.359951	-0.0935351	0.00295469	0.00883972	0.0625341	3.27135e-05	0.000165418	0.0342761	0.000316845	0.0012677	-0.790424	6.15101e-05	0.000222674	-0.241883	0.955407	0.975356	-0.0634491	0.579735	0.853655
ENSMUSG00000000131	Xpo6	0	0.00123271	0.161968	0.198813	-0.00607095	0.00094591	0.00306547	-0.000331408	0.86498	0.914689	0.015718	0.482637	0.977059	0.0196086	0.305997	0.920812	0.0134066	0.732176	0.990149	0.166757	0.166495	0.226281	0.26475	0.0273732	0.0445945	0.230315	0.0461541	0.0856779	0.0586493	0.490944	0.613245	0.0998678	0.62069	0.733838	0.211452	0.846548	0.903171	-0.276104	0.00125896	0.00351703	-0.274673	0.000688574	0.0038258	0.21181	0.812512	0.947627
ENSMUSG00000000134	Tfe3	0	0.00762951	1.66945e-07	5.72198e-07	-0.00155019	0.447036	0.546433	0.00347114	0.150567	0.249398	-0.00795417	0.758947	0.987211	0.00626167	0.766262	0.993002	0.0563562	0.239792	0.830082	0.704844	1.30216e-13	8.01157e-13	0.526267	3.65125e-08	1.38281e-07	0.287319	0.00223672	0.00592913	-0.182577	2.88121e-10	2.77891e-09	-0.0385445	6.91057e-08	5.54095e-07	-0.00487914	2.92717e-06	1.72817e-05	0.203446	0.0147317	0.03124	0.0924288	0.00101556	0.00533729	0.134341	0.0911243	0.367887
ENSMUSG00000000148	Brat1	0	0.00349019	0.00616786	0.00971274	0.00323423	0.165064	0.242346	0.00355139	0.193627	0.305312	0.0024805	0.907448	0.994332	-0.00554579	0.73046	0.990871	0.0306129	0.411812	0.925373	0.431735	0.00155841	0.00333243	0.250866	0.0665279	0.0989739	-0.158358	0.231949	0.330697	0.0815986	0.051533	0.104541	0.140563	0.0907022	0.169142	0.0290046	0.0445017	0.0950576	0.0986135	0.405753	0.515322	0.405734	0.302715	0.466815	-0.0380307	0.191106	0.53575
ENSMUSG00000000149	Gna12	0	0.00294134	0.0074995	0.0116384	-0.00484973	0.0192855	0.0398724	-0.00799175	0.00160025	0.00588379	0.00330812	0.814269	0.993609	0.00995487	0.465832	0.955634	0.0686451	0.0763279	0.558946	0.144872	0.342954	0.421359	0.333921	0.0282523	0.0458646	0.725578	7.63289e-07	3.63701e-06	0.278462	0.481152	0.604354	0.15948	0.908468	0.943273	-0.266012	0.0545753	0.112175	-0.0697891	0.0495162	0.0900712	0.234425	0.553051	0.699282	0.640407	0.291469	0.653717
ENSMUSG00000000167	Pih1d2	0	-0.00365807	0.00105359	0.0018637	0.000922848	0.638401	0.718556	-0.00165142	0.473033	0.601919	-0.00689616	0.433326	0.975922	-0.0056387	0.428698	0.949881	0.00697271	0.697758	0.987136	-0.362327	0.219781	0.287953	-0.926186	0.00962574	0.0172434	-0.483792	0.0759004	0.130878	-0.259214	0.671477	0.764094	-0.0774376	0.257346	0.386648	-0.256873	0.715706	0.810574	0.226072	0.00903873	0.0203869	-0.705173	0.208454	0.360284	-0.42278	0.154825	0.483234
ENSMUSG00000000168	Dlat	0	0.00324656	6.26043e-05	0.000134663	0.00452042	0.0019076	0.0055748	-0.0042459	0.010329	0.0281526	0.0320756	0.271262	0.957607	0.0176729	0.413828	0.947475	0.0252762	0.569453	0.96604	0.252568	0.00450988	0.00883899	0.287882	0.00115275	0.00243998	0.32946	8.38728e-05	0.000292067	0.0200189	0.0609754	0.120195	0.0890443	0.165866	0.275233	0.003281	0.0713826	0.140478	0.241395	0.782948	0.840858	0.33106	0.691779	0.804156	0.181829	0.0850889	0.356462
ENSMUSG00000000171	Sdhd	0	-0.00627059	8.34725e-08	2.94787e-07	-0.00220636	0.0236221	0.0473827	0.00360931	0.00237003	0.00821251	-0.00047076	0.986162	0.997826	-0.0159107	0.562045	0.972073	-0.0776465	0.110863	0.654826	-0.362915	2.58353e-09	1.15134e-08	-0.468858	2.10034e-14	1.31865e-13	-0.462025	2.14804e-14	2.0618e-13	-0.0983389	0.00160352	0.00515609	-0.101516	0.00168355	0.00577528	-0.0199956	0.000237503	0.00097768	-0.220502	0.00347035	0.00878143	-0.416838	0.526376	0.677278	-0.342674	0.0874782	0.361595
ENSMUSG00000000184	Ccnd2	0	0.0210979	8.34725e-08	2.94787e-07	-0.0195682	8.34725e-08	1.29021e-06	-0.0331842	8.34725e-08	1.605e-06	-0.306757	0.000209428	0.0145832	-0.319004	0.000135699	0.0135439	-0.148481	0.0276898	0.339194	1.6009	7.05175e-94	4.22365e-92	0.571865	8.66639e-13	4.90154e-12	1.74977	2.55872e-113	3.48305e-111	0.384431	7.39182e-27	2.66707e-25	1.06744	9.30635e-07	6.22103e-06	0.0163627	1.89142e-35	1.03458e-33	0.209645	0.00147967	0.00406628	0.71462	0.17579	0.318818	1.60901	0.0856387	0.356947
ENSMUSG00000000194	Gpr107	0	0.000949657	0.191551	0.231678	-0.00666429	4.69115e-05	0.000244009	-0.00388905	0.0207643	0.0502902	-0.00353588	0.891899	0.994332	0.00409379	0.863153	0.997038	-0.000406846	0.992122	0.999309	0.278025	0.00121005	0.0026403	-0.154454	0.0701321	0.103782	0.126139	0.129244	0.205907	-0.148051	0.000302048	0.00115992	-0.0856785	0.00195199	0.00655165	-0.0771606	0.00604854	0.0173007	-0.105247	0.681376	0.761174	-0.24803	0.403211	0.570437	0.0797051	0.571652	0.84898
ENSMUSG00000000223	Drp2	0	-0.00387931	0.00189649	0.00323389	0.00117319	0.596979	0.68315	0.00427514	0.105763	0.187722	0.0077411	0.724412	0.987144	-0.00352889	0.843718	0.997038	-0.0745786	0.090329	0.607119	-0.476089	0.000514318	0.00120215	-0.159006	0.210577	0.271792	-0.373738	0.00378581	0.00954139	-0.12812	0.0448705	0.0933004	-0.132478	0.0489519	0.101928	-0.263173	0.270423	0.403562	-0.084797	0.685252	0.764562	-0.365731	0.1855	0.330916	-0.326938	0.48017	0.800566
ENSMUSG00000000253	Gmpr	0	-0.0144428	8.34725e-08	2.94787e-07	0.00456588	0.162652	0.239539	0.00627333	0.104432	0.185966	-0.0215491	0.225046	0.923858	-0.0133407	0.345736	0.929768	-0.0571839	0.112741	0.659327	-2.52193	1.59557e-25	1.84314e-24	-1.20262	1.08722e-09	4.75148e-09	-0.992865	1.14373e-07	5.98808e-07	-0.108539	1.18794e-15	1.94403e-14	-0.2879	7.68716e-14	1.24103e-12	0.140815	1.97628e-16	3.73994e-15	-0.473592	0.00368183	0.00922497	-0.416623	0.000935897	0.00497388	-0.912185	0.277539	0.639765
ENSMUSG00000000266	Mid2	0	0.00258852	0.00979224	0.0149257	-0.00154497	0.399338	0.500384	0.00207873	0.333952	0.465319	-0.00684967	0.60801	0.98328	-0.0021671	0.82294	0.997038	-0.0115754	0.644504	0.979224	0.216778	0.290078	0.365311	0.203191	0.326374	0.39817	-0.0309906	0.867422	0.905593	-0.0225719	0.318593	0.446209	0.0620752	0.489147	0.621484	0.216069	0.998325	0.998781	0.0106007	0.448862	0.556987	0.133504	0.69656	0.807753	0.02526	0.374113	0.722049
ENSMUSG00000000275	Trim25	0	-0.00926634	8.34725e-08	2.94787e-07	-0.000459582	0.850061	0.889604	-0.00197922	0.487535	0.615534	-0.029426	0.105413	0.802915	-0.0183079	0.193888	0.855732	-0.0898986	0.0328953	0.369788	-1.49664	2.17592e-12	1.2324e-11	-1.23986	1.31228e-09	5.69145e-09	-0.574384	0.00117555	0.00329943	-0.552169	0.000360831	0.00136053	-0.571555	0.000362834	0.00146272	-0.116917	4.23754e-06	2.42646e-05	-0.0577678	9.81153e-06	4.02233e-05	-0.841074	0.0573385	0.140894	-0.470214	0.176173	0.515227
ENSMUSG00000000276	Dgke	0	-0.00454001	0.00020576	0.000407068	0.00294491	0.161472	0.238006	-0.00739146	0.0044374	0.0139516	-0.00350677	0.807264	0.993007	0.00297141	0.832892	0.997038	-0.014696	0.59973	0.972762	-0.46497	0.0198242	0.0341984	-0.569464	0.00516878	0.00977377	-0.0102197	0.951345	0.966185	-0.0819219	0.106204	0.190195	-0.195283	0.234783	0.360111	-0.0367827	0.101282	0.187319	0.217306	0.00320821	0.00818205	-0.414161	0.393432	0.560786	0.0220408	0.646516	0.883286
ENSMUSG00000000278	Scpep1	1	0.0240369	8.34725e-08	2.94787e-07	0.00286185	0.0987003	0.158002	-0.0145925	8.34725e-08	1.605e-06	-0.0150574	0.626738	0.984526	0.0173851	0.529458	0.969488	0.208779	0.000502463	0.0205393	1.67244	2.67028e-200	4.56962e-198	1.52367	1.33991e-164	1.47255e-162	1.53863	7.17865e-171	1.68614e-168	0.313125	1.11844e-66	1.76287e-64	0.569207	1.00045e-44	9.6648e-43	-0.00837295	9.39944e-79	1.68053e-76	0.769329	4.82713e-22	9.57354e-21	1.46906	0.46723	0.627039	1.14961	1.75494e-07	1.33054e-05
ENSMUSG00000000282	Mnt	0	0.00180827	0.10165	0.129732	-0.00333506	0.113625	0.177297	-0.00157243	0.519196	0.643768	-0.00464518	0.533409	0.979435	-0.000236183	0.968599	0.998983	-0.00514897	0.747175	0.990284	0.520957	0.0889759	0.130028	-0.140386	0.604618	0.669878	-0.0626745	0.785822	0.846145	0.292639	0.387472	0.517335	0.24064	0.266007	0.396281	0.115071	0.188585	0.305308	-0.0583431	0.7665	0.827646	-0.08133	0.676096	0.792462	-0.0296623	0.416775	0.756218
ENSMUSG00000000290	Itgb2	0	0.00501968	6.6778e-07	2.03857e-06	-0.00110135	0.456868	0.555617	-0.00766783	9.34891e-05	0.000532528	-0.000909486	0.704959	0.986299	0.000116261	0.967114	0.998981	-0.0064168	0.0552379	0.475276	1.12313	0.0250567	0.0421979	0.891723	0.0514553	0.0788415	2.39703	0.000279467	0.000889409	0.947702	0.339185	0.468044	1.04194	0.631243	0.743161	1.30053	0.243476	0.372728	0.701448	0.44632	0.554555	0.960171	0.507264	0.661858	2.39144	0.78822	0.93763
ENSMUSG00000000295	Hddc2	0	-0.0065275	8.34725e-07	2.49231e-06	-0.00662324	0.0019682	0.00571564	-0.00945238	0.000251085	0.00121722	0.0186143	0.430807	0.975922	0.00853819	0.649326	0.982569	0.0105713	0.785361	0.992579	-0.565428	1.47831e-05	4.33082e-05	-0.580346	7.63745e-06	2.23963e-05	0.165797	0.153199	0.236796	-0.0078982	0.00106424	0.003573	-0.0111255	0.000855596	0.00314972	-0.177248	0.0332533	0.0740135	-0.361618	0.198215	0.289245	-0.589789	0.94938	0.971853	0.117494	0.54406	0.837806
ENSMUSG00000000296	Tpd52l1	0	0.00805804	7.51252e-07	2.27024e-06	-0.00281769	0.246617	0.337935	0.00178607	0.528291	0.65272	-0.0108952	0.324118	0.969979	-0.00979126	0.261628	0.899829	-0.015777	0.446559	0.93416	0.209707	0.348389	0.426985	0.840571	0.000230369	0.000549172	0.627673	0.00350419	0.00892552	-0.00836407	0.373894	0.503131	0.296742	0.702584	0.797343	0.241138	0.904268	0.941188	0.261851	0.0482269	0.0881058	0.767039	0.694457	0.806252	0.564812	0.28004	0.64215
ENSMUSG00000000301	Pemt	0	0.00665572	2.33723e-06	6.44217e-06	0.00339822	0.117023	0.181913	-0.000585671	0.815009	0.880501	0.00527396	0.703297	0.986299	-0.00939272	0.390633	0.940905	0.0155134	0.559094	0.965352	0.530178	0.00397379	0.00788766	0.769763	2.81128e-05	7.68163e-05	0.370434	0.0328765	0.063819	0.267781	0.239264	0.360204	0.460394	0.736405	0.822509	0.249548	0.241418	0.370337	0.309741	0.0543824	0.0977121	0.849049	0.647785	0.772582	0.370374	0.996043	0.99871
ENSMUSG00000000317	Bcl6b	0	-0.0146311	8.34725e-08	2.94787e-07	-0.00629244	0.00177346	0.00522791	0.0148482	1.66945e-07	2.59046e-06	0.0104906	0.459389	0.975922	0.0078476	0.492319	0.962235	0.0438558	0.143463	0.715858	-3.10073	4.56641e-14	2.90037e-13	-1.07075	5.08928e-05	0.000134728	-1.66208	7.26088e-09	4.37773e-08	-0.70362	2.02436e-07	1.36773e-06	-0.857993	9.95428e-07	6.61722e-06	-0.39704	2.56069e-08	2.07401e-07	-1.1908	0.685085	0.764494	-1.3722	0.146177	0.280258	-1.59478	0.237287	0.59816
ENSMUSG00000000325	Arvcf	0	-0.0173427	8.34725e-08	2.94787e-07	0.0159865	8.51419e-06	5.92629e-05	-0.00298505	0.377956	0.509324	0.0249236	0.128699	0.855892	0.0320085	0.0260139	0.473739	0.0310747	0.302453	0.876702	-1.32498	1.90271e-06	6.25825e-06	-1.50551	1.37194e-07	4.90726e-07	-1.07359	3.68775e-05	0.000136429	-0.0829686	0.000290845	0.00111955	-0.307731	0.00182074	0.00618743	-0.179626	0.00171963	0.00576046	0.3671	4.74421e-07	2.38485e-06	-1.20252	0.142579	0.275717	-0.954742	0.0720401	0.324546
ENSMUSG00000000326	Comt	0	0.00145567	0.00700442	0.0109329	0.00286912	0.00573114	0.0142287	-0.0024565	0.0380316	0.0827876	0.0674604	0.0749462	0.731843	0.0989263	0.0200723	0.430416	0.097541	0.0600459	0.494275	0.329768	3.20585e-10	1.53796e-09	0.202905	0.000110211	0.000276023	0.16897	0.00115963	0.00326084	0.0979248	0.00112903	0.0037652	0.108804	0.0017932	0.00610421	0.0921138	0.00418922	0.0125519	0.22892	0.751576	0.81638	0.0531471	0.029737	0.0844695	0.141537	0.565561	0.847751
ENSMUSG00000000339	Rtca	0	0.00415935	8.34725e-08	2.94787e-07	-0.000134354	0.888681	0.917954	0.000773232	0.492038	0.619195	0.0142047	0.61416	0.984185	0.00597054	0.813234	0.997038	0.0378575	0.429019	0.929122	0.358049	8.05188e-07	2.76926e-06	0.305107	2.42716e-05	6.69312e-05	0.183736	0.00931161	0.0213358	0.073276	0.00453121	0.0128411	0.0777023	0.00471402	0.0140611	0.00128702	0.00135262	0.00468703	0.0102138	0.00376992	0.00941616	0.26313	0.660911	0.781531	0.0879575	0.206547	0.558465
ENSMUSG00000000340	Dbt	0	0.00612548	3.67279e-06	9.68229e-06	-0.00377222	0.07042	0.118644	-0.00947711	0.000362938	0.00165814	0.0215626	0.292456	0.967777	0.00412906	0.797849	0.995676	-0.0176537	0.622287	0.974506	0.800901	2.10311e-08	8.56911e-08	0.219577	0.129797	0.178213	0.654121	2.98286e-06	1.30742e-05	-0.142769	2.2072e-06	1.26508e-05	0.0944946	0.000253208	0.00105649	0.219361	0.00592	0.0170021	0.124417	0.569185	0.665002	0.122279	0.540146	0.688122	0.359374	0.0332899	0.206463
ENSMUSG00000000346	Dazap2	0	-0.00482332	8.34725e-08	2.94787e-07	0.000684237	0.483021	0.580527	0.00162787	0.15875	0.260503	-0.00494417	0.867809	0.993609	0.00343866	0.968662	0.998983	0.0261417	0.563618	0.965352	-0.239888	1.41287e-05	4.15025e-05	-0.364009	5.85299e-11	2.8536e-10	-0.334484	1.06719e-09	6.90649e-09	-0.146084	0.220216	0.337984	-0.100734	0.0666453	0.131566	-0.11141	0.129696	0.22805	0.00676201	1.62457e-06	7.54877e-06	-0.262077	0.175115	0.318027	-0.226072	0.0961879	0.377271
ENSMUSG00000000355	Mcts1	0	-0.00564176	5.00835e-07	1.59054e-06	-0.00518554	0.00250843	0.00703218	-0.0154453	8.34725e-08	1.605e-06	0.0529807	0.084501	0.750721	0.0245785	0.274583	0.904956	0.0523279	0.270292	0.849233	-0.0583387	0.58684	0.656129	-0.645755	9.11708e-09	3.65018e-08	0.262624	0.0140433	0.0304981	-0.0571977	0.980461	0.988465	0.0573097	0.404012	0.542766	0.161133	0.120271	0.214873	-0.164323	0.00130377	0.00363207	-0.389176	0.0523934	0.131137	0.259061	0.917797	0.981409
ENSMUSG00000000359	Rem1	0	-0.0119855	8.34725e-08	2.94787e-07	0.000839253	0.777146	0.83291	0.00503321	0.152702	0.252271	-0.43866	0.000403155	0.0246646	-0.0332937	0.100156	0.758741	-0.507982	0.000315623	0.014319	-1.50665	2.4905e-23	2.5965e-22	-1.11468	1.09323e-14	7.01811e-14	-0.807859	4.10377e-09	2.52357e-08	-0.116492	6.47e-12	7.50282e-11	-0.367162	7.49074e-09	6.78756e-08	-0.0358446	4.30772e-11	4.83166e-10	0.146037	1.50601e-10	1.16131e-09	-1.06092	0.728213	0.829917	-0.707074	0.230319	0.588271
ENSMUSG00000000374	Trappc10	0	-0.00215202	0.134232	0.167339	0.00388366	0.156646	0.232006	-0.00037714	0.905258	0.940162	-0.0018844	0.899541	0.994332	0.0190918	0.144343	0.820224	0.0154623	0.593186	0.97072	-0.337892	0.0841684	0.123758	-0.0835589	0.645774	0.707299	0.184187	0.29411	0.400539	-0.061645	0.236258	0.356665	-0.283953	0.79835	0.867253	-0.0206798	0.208677	0.330742	0.122188	0.397955	0.507355	-0.100082	0.9254	0.958654	0.0773262	0.152581	0.479602
ENSMUSG00000000378	Ccm2	0	0.00304011	0.114355	0.144423	0.00572557	0.119477	0.18518	0.00288454	0.498306	0.624269	0.023783	0.161373	0.882104	0.0141984	0.287859	0.914977	-0.0287811	0.342225	0.900489	0.516911	0.0118912	0.0214978	0.564923	0.0061779	0.0115183	0.269053	0.179534	0.268921	0.0153797	0.053065	0.107141	0.309046	0.41789	0.555655	0.784143	0.289198	0.424235	0.164789	0.14081	0.218125	-0.220448	0.00169094	0.00821711	0.147968	0.119922	0.425826
ENSMUSG00000000384	Tbrg4	0	0.0136954	8.34725e-08	2.94787e-07	-0.0122312	8.34725e-08	1.29021e-06	0.00638483	0.000220284	0.00108995	0.034375	0.234279	0.932522	0.0278466	0.272803	0.904956	0.0239296	0.602692	0.972835	0.960469	2.7882e-32	4.28202e-31	1.09418	1.15652e-41	2.14789e-40	0.621676	1.60889e-14	1.56946e-13	0.0649222	5.50713e-15	8.49034e-14	0.136981	3.69195e-13	5.54209e-12	-0.0425157	5.40601e-15	8.91991e-14	-0.552234	5.76839e-44	2.83195e-42	0.325307	8.37657e-12	2.4899e-10	0.282569	0.000718412	0.0143192
ENSMUSG00000000399	Ndufa9	0	0.0020281	0.00136194	0.00236994	6.78054e-05	0.951579	0.964951	-0.00494326	0.000591987	0.00252005	-0.0244295	0.426069	0.975922	-0.00693971	0.783992	0.993002	-0.0207152	0.655229	0.984086	0.0735902	0.278853	0.353144	0.0449059	0.45006	0.523424	0.265215	0.000107229	0.000365954	0.0559725	0.846583	0.89785	0.0601651	0.892206	0.932287	-0.0286061	0.343675	0.484967	0.196354	0.152	0.232157	0.137846	0.396734	0.563632	0.17539	0.232059	0.590074
ENSMUSG00000000409	Lck	0	0.00708299	8.34725e-08	2.94787e-07	-0.0196188	8.34725e-08	1.29021e-06	-0.0300821	8.34725e-08	1.605e-06	0.000946717	0.889407	0.994332	-0.00154401	0.792979	0.99518	0.00157384	0.908885	0.992809	1.52164	2.34509e-06	7.61915e-06	-0.508381	0.114796	0.16018	2.21631	6.89576e-12	5.42735e-11	0.57966	0.011099	0.0281923	1.33026	0.431244	0.56874	-0.191441	0.000545021	0.00206804	-1.20725	0.0728505	0.125294	-0.203185	0.120152	0.244032	2.18621	0.522327	0.827137
ENSMUSG00000000420	Galnt1	0	-0.00781123	8.34725e-08	2.94787e-07	-0.00166136	0.370115	0.471394	-0.0030219	0.167694	0.272049	0.203228	0.00802162	0.230949	0.0356502	0.122118	0.795382	0.0020552	0.961183	0.995062	-0.447756	0.000373082	0.000892225	-0.515159	4.91292e-05	0.000130261	-0.084236	0.472014	0.581056	-0.302585	0.363907	0.493239	-0.197172	0.113739	0.203502	0.114424	0.00214988	0.00701919	-0.383924	0.429617	0.538324	-0.506086	0.910992	0.948524	-0.22443	0.129354	0.442239
ENSMUSG00000000435	Myf5	0	0.0437989	8.34725e-08	2.94787e-07	-0.00722266	0.0175098	0.0366312	0.0510773	8.34725e-08	1.605e-06	-0.0346069	0.0508562	0.62924	-0.0340502	0.0208267	0.433235	-0.050274	0.123187	0.686237	2.38282	4.91744e-72	2.13428e-70	3.60743	7.04247e-169	7.81128e-167	0.513218	0.000158153	0.000527427	-0.0889825	6.08939e-32	2.88319e-30	-0.225803	3.06471e-35	2.13443e-33	0.156064	2.33649e-22	6.55477e-21	-0.357317	9.03034e-76	1.03023e-73	1.9989	2.82637e-17	1.56024e-15	0.240685	0.0265114	0.178818
ENSMUSG00000000439	Mkrn2	0	0.00739649	8.34725e-08	2.94787e-07	0.00485932	0.00149182	0.00451846	-0.000478347	0.770881	0.848503	-0.00266999	0.905592	0.994332	0.0174333	0.450672	0.953544	0.0399729	0.389718	0.916907	0.556598	2.03184e-08	8.29283e-08	0.597682	1.53193e-09	6.59396e-09	0.335496	0.000556862	0.00167436	0.259934	0.0272966	0.0614717	0.170033	0.00336926	0.0105023	-0.0191211	0.00025044	0.0010267	0.33598	0.0525254	0.0948255	0.576199	0.876917	0.928317	0.314537	0.746279	0.921633
ENSMUSG00000000440	Pparg	0	-0.00118122	0.503179	0.553446	0.000689704	0.838172	0.881438	0.0351248	8.34725e-08	1.605e-06	0.0364386	0.0664243	0.702237	0.0371176	0.0293219	0.503858	0.0298133	0.368309	0.90775	-0.605448	0.00215647	0.00449337	1.19009	6.54946e-11	3.17893e-10	-0.791566	5.77943e-05	0.000206416	-0.112131	0.0359412	0.0775608	-0.279281	0.0894517	0.167402	0.171131	0.00245771	0.00792488	-1.03262	4.03798e-16	5.55988e-15	-0.364991	1.41483e-09	3.07034e-08	-0.902893	0.141353	0.461728
ENSMUSG00000000441	Raf1	0	0.0178277	2.40401e-05	5.50097e-05	0.0198757	0.0064707	0.015806	0.0054268	0.5025	0.628072	0.00622462	0.375743	0.975922	0.00816961	0.139715	0.815156	0.0032118	0.817165	0.992803	1.47275	0.000476944	0.00112246	1.87629	2.20892e-05	6.12232e-05	0.71959	0.0270176	0.0538867	1.08999	0.171708	0.27924	1.1112	0.157809	0.264797	1.32669	0.57851	0.703112	0.865679	0.0243285	0.0486609	1.39497	0.0363806	0.0986428	0.696924	0.498643	0.814126
ENSMUSG00000000532	Acvr1b	0	-0.00113944	0.238528	0.282651	-0.0011624	0.527712	0.621702	6.26207e-05	0.976718	0.98494	0.00827842	0.336185	0.975922	-0.00113441	0.859257	0.997038	-0.00283796	0.847735	0.992803	-0.225163	0.447469	0.525874	-0.0229827	0.921787	0.939752	-0.0757993	0.743469	0.814079	-0.16174	0.794747	0.860395	-0.0485433	0.452808	0.588116	-0.276216	0.84245	0.900483	-0.366884	0.294622	0.400554	-0.00554062	0.908784	0.947977	-0.083174	0.847608	0.958904
ENSMUSG00000000538	Tom1l2	0	0.00456892	7.62938e-05	0.000162187	-0.0162389	8.34725e-08	1.29021e-06	0.0148313	2.50417e-07	3.3819e-06	0.0287327	0.327049	0.971844	-0.00284548	0.882096	0.997038	0.0560499	0.269103	0.847697	0.578312	2.86737e-10	1.37889e-09	0.353277	0.000131547	0.000325714	-0.147708	0.108883	0.177651	-0.195813	2.05099e-09	1.765e-08	-0.177164	4.07149e-09	3.81332e-08	-0.0931205	2.13068e-06	1.29692e-05	-0.923321	6.11443e-21	1.14088e-19	-0.326349	1.38062e-07	2.02926e-06	-0.305059	0.0822616	0.349685
ENSMUSG00000000555	Itga5	0	0.0279118	8.34725e-08	2.94787e-07	0.0133661	2.20367e-05	0.000128456	0.031397	8.34725e-08	1.605e-06	-0.00227014	0.870077	0.993609	0.00316007	0.962934	0.99829	-0.04846	0.298145	0.873504	1.3727	4.24956e-151	5.35848e-149	2.6157	1e-307	2.92171e-305	0.455633	1.13773e-17	1.37249e-16	0.395239	3.93017e-39	2.63014e-37	0.285818	3.15398e-48	3.40375e-46	-0.0221385	4.8248e-61	6.21466e-59	0.462881	1.99178e-184	1.13617e-181	1.62254	1.36746e-42	3.41266e-40	0.0510969	2.84532e-08	2.51527e-06
ENSMUSG00000000561	Wdr77	0	0.00728389	8.34725e-08	2.94787e-07	-0.00744772	0.000238147	0.000961497	-0.0154165	8.34725e-08	1.605e-06	0.00432415	0.912028	0.994332	-0.0100291	0.715751	0.989445	-0.000225366	0.994596	0.999309	0.908204	4.24365e-71	1.82859e-69	-0.0687245	0.198146	0.257439	0.621707	3.30462e-34	8.7194e-33	0.0616157	3.02116e-31	1.36568e-29	0.212873	4.14095e-22	1.37029e-20	0.0467356	2.04276e-26	7.28279e-25	-0.0552268	0.856165	0.897818	0.392736	1.27815e-10	3.2646e-09	0.466713	0.00902774	0.0883524
ENSMUSG00000000563	Atp5f1	0	-0.000359678	0.574281	0.621382	-0.00186908	0.131768	0.200743	-0.0035526	0.0177124	0.0439563	-0.0481703	0.141553	0.86987	-0.013526	0.649152	0.982569	-0.0683635	0.103781	0.638696	-0.264778	1.72677e-10	8.49135e-10	-0.0341712	0.403649	0.476526	0.184589	4.2045e-06	1.79557e-05	0.00632927	2.66307e-06	1.50547e-05	0.00909519	1.69849e-06	1.08513e-05	-0.0163318	0.000105617	0.000471556	-0.0109744	0.686872	0.765977	-0.026351	0.889616	0.935867	0.121339	0.215967	0.570552
ENSMUSG00000000567	Sox9	0	0.00228632	0.112877	0.142767	-0.0134082	3.66444e-05	0.000197376	0.0201138	5.00835e-07	6.14703e-06	-0.378994	0.000922469	0.0462277	-0.395269	0.000669157	0.047423	-0.337121	0.00359293	0.0892024	-0.474984	0.000282256	0.000689009	0.207207	0.102337	0.144751	-0.28165	0.022081	0.045308	-0.0935084	0.0272272	0.0613419	-0.308552	0.31667	0.451756	0.101936	0.00298796	0.00939443	-0.539808	5.40882e-05	0.000197297	-0.483395	8.37731e-05	0.000619838	-0.409235	0.162939	0.496779
ENSMUSG00000000568	Hnrnpd	0	0.00124037	0.273119	0.319346	-0.0150908	1.66945e-07	2.11847e-06	0.00289114	0.255697	0.37899	0.0254252	0.204929	0.91405	0.00920637	0.549671	0.970535	0.00748234	0.827083	0.992803	0.16152	0.286023	0.361078	0.235884	0.119659	0.166191	0.234152	0.103034	0.16947	0.0337308	0.533212	0.651374	-0.0339717	0.29192	0.425673	-0.0319452	0.382691	0.52602	-1.08226	1.12679e-08	7.00092e-08	-0.511921	0.00042333	0.00254956	0.125004	0.195342	0.54129
ENSMUSG00000000579	Dynlt1c	0	-0.0079148	5.64274e-05	0.000122387	0.00894791	0.00886694	0.0205608	0.00175179	0.645215	0.751631	-0.0306547	0.0135728	0.323184	-0.00170193	0.848387	0.997038	-0.0169195	0.443035	0.93416	-1.25937	6.86751e-05	0.000183752	-0.993412	0.00097591	0.00208907	-0.870179	0.00188571	0.00507136	0.165726	0.000474021	0.00174395	-0.782531	0.0909445	0.169455	-0.470983	0.0268984	0.0620363	1.27231	1.86498e-07	9.92477e-07	-1.10581	0.521392	0.673688	-0.758215	0.0464927	0.253455
ENSMUSG00000000581	C1d	0	-0.00277398	0.000774374	0.0013985	-0.00767939	1.34391e-05	8.47298e-05	-0.000541988	0.747825	0.831773	-0.0227279	0.400963	0.975922	-0.0391766	0.129966	0.805279	0.0153181	0.730873	0.990149	-0.237672	0.0216202	0.0369766	-0.300859	0.00386431	0.00748313	-0.161767	0.105765	0.173224	-0.0751753	0.239233	0.360202	-0.105366	0.330149	0.465284	-0.0653374	0.256064	0.387346	-0.284956	0.910411	0.937403	-0.260525	0.752442	0.848815	0.0141539	0.0654309	0.308096
ENSMUSG00000000594	Gm2a	0	-0.00715012	8.34725e-08	2.94787e-07	0.00757658	0.000273289	0.00107406	0.00726769	0.00177788	0.00640771	-0.0084871	0.72625	0.987144	-0.0213061	0.310928	0.923049	0.0663875	0.175032	0.767055	-0.809428	3.13735e-11	1.63615e-10	-0.342211	0.00294944	0.00583026	-0.519058	5.36456e-06	2.25719e-05	-0.159817	4.9526e-05	0.000225065	-0.240298	0.000310265	0.00126676	-0.111657	5.56099e-05	0.000263613	0.147731	0.00165064	0.00449182	-0.0287917	0.0287384	0.0823172	-0.498899	0.795431	0.941005
ENSMUSG00000000600	Krit1	0	-0.00313955	0.000744574	0.00134813	0.000436343	0.788238	0.842288	-0.00492873	0.0133972	0.0348955	0.0309379	0.261359	0.950406	-0.00140094	0.946738	0.997038	0.0235157	0.592061	0.97072	-0.394234	0.000116869	0.000303222	-0.242195	0.0162882	0.0278379	0.130304	0.17065	0.258148	-0.183621	0.117329	0.205962	-0.00677059	0.00392161	0.01199	-0.114982	0.0570162	0.116473	-0.122077	0.377367	0.487225	0.0980804	0.00835897	0.0307909	-0.0246872	0.0890332	0.364372
ENSMUSG00000000605	Clcn4	0	-0.00545858	1.66945e-07	5.72198e-07	0.00163582	0.270904	0.365364	0.00258628	0.140681	0.236685	0.0098941	0.685369	0.986078	0.00256257	0.981238	0.998983	0.0376896	0.423571	0.929122	-0.284212	0.00355854	0.00713436	-0.386782	8.33473e-05	0.000213565	-0.312017	0.00109601	0.00309941	-0.0520093	0.0755244	0.143718	-0.129292	0.228018	0.352442	-0.119427	0.252397	0.382912	-0.00988871	0.00496626	0.0120647	-0.161284	0.0720082	0.167623	-0.333655	0.739274	0.919795
ENSMUSG00000000627	Sema4f	0	0.0173879	8.34725e-08	2.94787e-07	-0.00196118	0.495242	0.591359	-0.00611994	0.0750582	0.142582	0.00790426	0.0776759	0.741334	0.000418657	0.836812	0.997038	0.0136235	0.127708	0.695256	3.93372	1.99247e-15	1.38364e-14	3.01472	1.01201e-09	4.43573e-09	2.9977	9.88179e-10	6.41246e-09	0.545295	9.31272e-08	6.58542e-07	1.45377	9.86612e-05	0.000448865	-0.643552	2.1632e-09	1.97809e-08	-0.102508	1.55618e-06	7.25067e-06	3.0632	0.751397	0.848411	2.77086	0.000926737	0.0175377
ENSMUSG00000000628	Hk2	0	0.0387332	8.34725e-08	2.94787e-07	-0.00258678	0.469442	0.568079	0.000229758	0.956003	0.97207	0.0290677	0.252489	0.946155	0.0381984	0.0805477	0.704723	0.0256034	0.523723	0.959534	2.44738	1.28579e-117	1.02683e-115	3.23331	3.88696e-209	5.82024e-207	2.30305	1.04758e-104	1.28051e-102	0.89515	5.22247e-25	1.69539e-23	0.792293	1.34449e-28	6.97215e-27	0.349486	3.014e-34	1.55624e-32	0.278514	1.00294e-81	1.26466e-79	2.13263	1.66028e-14	6.83455e-13	1.45992	3.22483e-09	3.51184e-07
ENSMUSG00000000631	Myo18a	0	-0.0128621	8.34725e-08	2.94787e-07	-6.69584e-06	0.996527	0.99768	0.00893293	2.44574e-05	0.000174183	-0.0178368	0.509531	0.97774	-0.00856282	0.703038	0.989445	-0.00718848	0.868363	0.992809	-0.950134	2.21431e-20	1.99738e-19	-0.843124	9.50815e-17	6.94501e-16	-0.982165	3.00814e-22	4.72894e-21	-0.0881808	5.16901e-10	4.78145e-09	-0.182662	2.19989e-08	1.87162e-07	0.0697639	2.58285e-11	2.9636e-10	-0.345219	0.000305057	0.00097059	-0.572808	0.0343419	0.0941593	-0.596521	0.00105877	0.0194226
ENSMUSG00000000686	Abhd15	0	-0.00684231	4.19032e-05	9.28864e-05	0.0089007	0.00263831	0.00734473	-0.00316703	0.328079	0.459227	-0.00506128	0.595372	0.982766	-0.00313451	0.722826	0.989778	-0.00982387	0.59182	0.97072	-1.52261	0.000191851	0.000482609	-1.09982	0.00301745	0.00595053	-0.700703	0.0218736	0.0449405	0.0934475	0.00109467	0.00366596	-0.635122	0.0196901	0.0478157	-0.282844	0.00896551	0.0243147	0.356501	0.00234028	0.00614303	0.0776087	0.00471812	0.0194021	-0.62796	0.0832133	0.351609
ENSMUSG00000000693	Loxl3	0	-0.0184024	8.34725e-08	2.94787e-07	0.0101372	8.72287e-05	0.000410575	0.00853329	0.00217346	0.0076329	0.125856	0.0139343	0.327881	0.030532	0.301988	0.918471	0.209321	0.0022769	0.0637161	-1.56738	1.50461e-63	5.41252e-62	-0.735058	3.13465e-17	2.35275e-16	-0.996758	5.00188e-30	1.11164e-28	-0.270529	1.7731e-25	5.91643e-24	-0.332763	2.44047e-23	8.72669e-22	-0.0206527	8.38893e-30	3.56351e-28	0.051557	3.74089e-11	3.11628e-10	-0.65715	0.479657	0.637574	-0.611067	0.000306219	0.00729496
ENSMUSG00000000708	Kat2b	0	-0.0113453	8.34725e-08	2.94787e-07	-0.00399007	0.0317321	0.0607219	0.00813524	0.000483639	0.00213379	0.00324155	0.808999	0.993007	-0.00336109	0.752299	0.993002	-0.0294203	0.259756	0.842019	-1.97375	3.8749e-10	1.84856e-09	-1.25023	5.08797e-06	1.52448e-05	-1.53721	4.33052e-08	2.38946e-07	-0.592897	0.000169754	0.000686988	-0.440413	3.78746e-05	0.00018857	-0.0200177	3.99617e-06	2.29813e-05	-1.09518	0.582879	0.677236	-1.19544	0.753248	0.849158	-1.39315	0.0429991	0.241598
ENSMUSG00000000711	Rab5b	0	-0.00469398	8.76461e-06	2.15632e-05	0.00731961	0.000151753	0.000660315	-0.00235413	0.234529	0.35486	0.0177082	0.499001	0.97774	0.0201692	0.378931	0.938086	0.0575313	0.236647	0.828264	-0.0686479	0.504803	0.581591	-0.383204	0.000298607	0.000697547	-0.276339	0.00664342	0.0157521	-0.0291596	0.823334	0.881238	-0.0188779	0.73989	0.825784	-0.197604	0.39512	0.53767	0.320277	1.01944e-06	4.90242e-06	-0.158281	0.085832	0.191004	-0.194577	0.322638	0.677487
ENSMUSG00000000738	Spg7	0	0.00452416	0.000134224	0.000273912	-0.00187634	0.34982	0.4503	0.0038484	0.106435	0.188689	-0.0173399	0.322125	0.969979	-0.0160123	0.270591	0.904956	-0.0363821	0.279836	0.858722	0.115626	0.475343	0.553312	0.345448	0.0341698	0.0545252	0.138955	0.367168	0.477038	0.310842	0.323818	0.451833	0.0959035	0.928581	0.956118	0.0604547	0.808456	0.877934	-0.0143623	0.096845	0.158984	0.317644	0.897231	0.941256	0.0957044	0.550342	0.841316
ENSMUSG00000000740	Rpl13	0	0.00340981	0.00179866	0.00307495	0.00210377	0.27984	0.374841	-0.00413491	0.0746528	0.142015	-0.0434934	0.182102	0.898654	-0.0643344	0.0432726	0.591607	-0.0229661	0.543588	0.960988	-0.14394	0.00153256	0.00328358	0.348547	1.05154e-14	6.75773e-14	0.425273	2.30226e-21	3.43446e-20	0.107877	7.29017e-05	0.000320238	0.161666	1.37111e-06	8.90218e-06	0.0714894	0.00229443	0.00744648	0.199234	0.0185588	0.0383965	0.337531	0.859365	0.918102	0.305067	0.0337857	0.207951
ENSMUSG00000000743	Chmp1a	0	-0.00946375	8.34725e-08	2.94787e-07	-0.00582832	4.58264e-05	0.000238987	0.00111223	0.431293	0.563287	0.012307	0.685632	0.986078	0.028599	0.319588	0.92559	-0.0328315	0.493709	0.953677	-0.744619	3.80371e-29	5.19552e-28	-0.664388	5.26284e-24	5.36998e-23	-0.313901	4.20546e-07	2.06464e-06	-0.13051	6.62573e-12	7.66856e-11	-0.1447	1.12388e-11	1.42014e-10	0.106031	5.38858e-18	1.14857e-16	-0.49669	0.0628635	0.110507	-0.56198	0.236058	0.393507	-0.347968	0.615502	0.871112
ENSMUSG00000000751	Rpa1	0	-0.0190618	8.34725e-08	2.94787e-07	0.00556075	0.000377796	0.00141843	-0.00616788	0.000585058	0.00249587	0.0270007	0.395785	0.975922	-0.00588816	0.825159	0.997038	0.0892927	0.0556751	0.478351	-1.51578	4.04567e-176	5.83892e-174	-1.33645	1.03129e-142	9.72742e-141	-0.701727	4.08582e-46	1.56371e-44	-0.153154	1.28535e-80	2.74951e-78	-0.123589	1.18355e-84	3.83182e-82	-0.0843114	2.32047e-74	3.70626e-72	-0.0608933	1.79609e-72	1.88731e-70	-0.450113	1.43254e-35	2.76781e-33	-0.314219	4.5875e-09	4.77858e-07
ENSMUSG00000000753	Serpinf1	1	0.0131087	8.34725e-08	2.94787e-07	0.00519592	0.00049808	0.00177522	-0.0262471	8.34725e-08	1.605e-06	0.128448	0.00420488	0.144718	0.230515	6.82975e-06	0.00113611	0.271645	2.81985e-06	0.000261809	1.21852	2.31069e-144	2.66151e-142	0.798497	5.24176e-62	1.59368e-60	1.41282	4.38671e-196	1.19428e-193	0.411435	2.89751e-33	1.48967e-31	0.620391	2.01347e-19	5.54469e-18	0.0820369	7.86008e-52	7.47269e-50	0.824666	0.69546	0.773128	0.84484	0.476978	0.63507	1.16764	7.31482e-05	0.00235549
ENSMUSG00000000759	Tubgcp3	0	0.000197945	0.793572	0.821988	-0.00351604	0.0194714	0.0402151	0.00357967	0.0410444	0.0880973	-0.0168036	0.572569	0.982596	-0.00351918	0.875075	0.997038	0.031379	0.495615	0.953677	-0.184319	0.0283591	0.0471235	0.127313	0.124299	0.171798	-0.0747271	0.359706	0.469842	0.00960146	0.0894633	0.164697	-0.0667886	0.295477	0.429657	-0.122786	0.624131	0.741375	-0.219091	0.00289862	0.0074608	0.0490851	0.466018	0.625902	0.0400345	0.160071	0.492801
ENSMUSG00000000776	Polr3d	0	0.0163859	8.34725e-08	2.94787e-07	2.72148e-05	0.983394	0.987701	0.00453077	0.00529457	0.016196	0.0116193	0.634221	0.984555	0.0187092	0.369837	0.934663	0.0447237	0.321563	0.890405	1.16789	5.18937e-33	8.21182e-32	1.36478	6.62701e-45	1.3387e-43	0.748941	1.13328e-14	1.11549e-13	0.201634	1.56894e-12	1.94558e-11	0.278457	4.7488e-11	5.56069e-10	-0.0315013	9.09525e-15	1.47632e-13	0.184833	2.3493e-17	3.51778e-16	0.770395	3.92924e-06	4.13606e-05	0.444334	0.00590589	0.0664912
ENSMUSG00000000782	Tcf7	0	-0.00430202	2.88815e-05	6.54133e-05	0.000391685	0.816252	0.864932	0.0053179	0.0104322	0.0284017	-0.00110735	0.898452	0.994332	0.00252675	0.715962	0.989445	0.00896724	0.609259	0.97431	-1.82157	5.86947e-05	0.000158607	-0.291448	0.316728	0.388101	-0.558734	0.0461869	0.0857123	-0.997801	0.0308955	0.0684011	-0.498116	0.0040738	0.0123921	-0.285009	0.0027576	0.00875984	-0.332467	0.89183	0.923197	-0.27709	0.926418	0.959001	-0.546467	0.761563	0.927676
ENSMUSG00000000787	Ddx3x	0	0.00648992	8.34725e-08	2.94787e-07	-0.015762	8.34725e-08	1.29021e-06	0.00208133	0.114304	0.200095	0.0248061	0.427681	0.975922	0.014043	0.605763	0.978136	0.0308792	0.509348	0.956187	0.63385	9.08332e-23	9.22893e-22	0.325292	5.20945e-07	1.7485e-06	0.30993	1.36162e-06	6.27341e-06	-0.045722	7.04557e-14	9.88278e-13	-0.0469785	4.99203e-14	8.21422e-13	-0.0552331	9.0615e-12	1.08984e-10	-0.620166	1.78284e-24	4.11495e-23	-0.129045	3.82846e-07	5.15293e-06	0.129036	0.0178977	0.13985
ENSMUSG00000000791	Il12rb1	0	0.00523743	0.000300751	0.000578654	-0.0156176	1.75292e-06	1.67317e-05	0.0163347	3.3389e-06	3.1568e-05	-0.0423462	0.04522	0.597134	-0.0210441	0.149625	0.823805	-0.11287	0.0258938	0.32572	0.282545	0.082486	0.121508	0.0924818	0.597505	0.663101	-0.470323	0.00453202	0.0111982	-0.207342	0.0252399	0.0574808	-0.153683	0.0406556	0.0874979	-0.124682	0.0857661	0.16365	-1.08034	4.63801e-06	1.9978e-05	-0.0872191	0.304974	0.468747	-0.488017	0.795815	0.941073
ENSMUSG00000000804	Usp32	0	-0.00233068	0.0453348	0.0617682	-0.00647546	0.00504858	0.0127266	0.00153766	0.545858	0.668456	0.00929892	0.590139	0.982596	0.0146253	0.310883	0.923049	0.00996176	0.755786	0.990942	-0.270012	0.12327	0.173845	-0.0307398	0.850017	0.8822	0.0853188	0.592893	0.689742	-0.000183817	0.204848	0.319807	-0.124274	0.468756	0.602248	0.0891548	0.128313	0.226237	-0.506464	0.0419872	0.0782946	-0.164965	0.439572	0.602271	0.025576	0.423427	0.76114
ENSMUSG00000000811	Txnrd3	0	0.0191	0.000284808	0.000550632	0.0212617	0.0226213	0.0457274	-0.00994303	0.348504	0.479634	0.00239065	0.658338	0.986078	0.00703036	0.0780519	0.695591	-0.00195926	0.847462	0.992803	2.20017	0.000590189	0.00136431	2.0105	0.00125949	0.00264322	1.06818	0.0141054	0.0306046	1.99923	0.306251	0.432922	1.97021	0.206671	0.326827	2.15494	0.818348	0.884986	1.70084	0.269576	0.372893	1.84697	0.140003	0.272434	1.0702	0.936929	0.986159
ENSMUSG00000000823	Zfp512b	0	-0.0105598	8.34725e-08	2.94787e-07	0.00366907	0.103633	0.164448	0.000364083	0.888426	0.930107	0.00993888	0.521293	0.978472	0.0182537	0.164064	0.834602	0.00839708	0.777639	0.992579	-0.996698	2.16467e-05	6.20052e-05	-0.85507	0.000155811	0.000381065	-0.563225	0.00595802	0.0143057	0.0480616	0.000348525	0.00131786	-0.513984	0.0562069	0.114177	-0.105497	0.0037954	0.0115189	-0.199218	0.0190639	0.0392814	-0.741585	0.529314	0.679825	-0.507683	0.380662	0.72736
ENSMUSG00000000826	Dnajc5	0	0.00282514	0.00491753	0.00787015	-0.0159331	8.34725e-08	1.29021e-06	0.00953319	7.90484e-05	0.000460565	-0.0051879	0.858615	0.993609	0.000220381	0.992501	0.998983	-0.0163549	0.699397	0.987136	0.371685	7.10155e-07	2.45723e-06	0.197772	0.00876166	0.0158162	-0.044882	0.547592	0.649432	-0.0383311	8.67295e-05	0.000373583	-0.134967	1.12597e-06	7.42322e-06	-0.061977	0.000188361	0.00079422	-0.654812	4.85276e-15	6.01773e-14	-0.630914	1.39242e-14	5.81179e-13	-0.147513	0.187742	0.531459
ENSMUSG00000000827	Tpd52l2	0	0.00392082	8.34725e-08	2.94787e-07	0.00185726	0.0791775	0.131354	3.34468e-05	0.97803	0.985683	-0.0198911	0.502732	0.97774	0.00371921	0.927869	0.997038	0.0091014	0.843852	0.992803	0.26557	5.33092e-05	0.000145156	0.221492	0.000786196	0.00171047	0.122019	0.0538427	0.0978134	0.0101877	0.00506466	0.0141836	-0.0166514	0.00179829	0.00611806	-0.0979179	0.000573041	0.00216178	0.175284	0.615784	0.707105	0.276677	0.567166	0.711375	0.102164	0.68593	0.90096
ENSMUSG00000000838	Fmr1	0	8.75501e-05	0.934928	0.945984	-0.00197693	0.338396	0.438327	-0.000532693	0.824639	0.887796	-0.178066	0.0102639	0.270178	-0.270602	0.0023126	0.119895	-0.0724279	0.149608	0.72271	-0.184144	0.0768024	0.114344	-0.206511	0.0469162	0.0726016	-0.202297	0.046444	0.0861494	-0.0561179	0.36999	0.499167	-0.00208025	0.196186	0.313224	-0.0885994	0.49991	0.635579	0.150016	0.0156186	0.0328988	-0.102589	0.422726	0.58845	0.115324	0.00677188	0.072819
ENSMUSG00000000876	Pxmp4	0	-0.00934072	8.34725e-08	2.94787e-07	0.00181008	0.417712	0.518365	0.00808523	0.00370376	0.0119524	0.0180213	0.180391	0.896219	0.00828815	0.432898	0.95047	-0.0138284	0.571365	0.96604	-0.741667	0.00262972	0.005383	-0.845906	0.000800129	0.00173889	-1.12425	1.46847e-05	5.77505e-05	-0.327533	0.118744	0.207867	-0.512358	0.330189	0.465284	0.140261	0.00796564	0.0218955	-0.600968	0.380071	0.489609	-0.657355	0.317495	0.481672	-1.11047	0.796594	0.941099
ENSMUSG00000000881	Dlg3	0	-0.0121239	8.34725e-08	2.94787e-07	0.00309403	0.126131	0.193757	0.000185756	0.936547	0.960439	-0.026364	0.107102	0.808463	-0.0139308	0.268671	0.904956	-0.0513504	0.105785	0.643468	-1.77822	2.52918e-13	1.52784e-12	-1.44645	2.89519e-10	1.32676e-09	-1.05627	4.31e-07	2.11509e-06	0.17838	3.80906e-10	3.60417e-09	-0.161178	1.18512e-07	9.1887e-07	-0.0577659	2.82757e-07	1.97386e-06	0.0233776	8.10921e-07	3.95522e-06	-0.912789	0.0222839	0.0673421	-0.498184	0.00604632	0.0676273
ENSMUSG00000000884	Gnb1l	0	-0.00469935	0.00337763	0.00554483	-0.0241036	8.34725e-08	1.29021e-06	0.00647367	0.0607436	0.120177	0.00496694	0.763903	0.987826	-0.00067597	0.986481	0.998983	-0.062216	0.0963187	0.623727	-0.590226	0.00111532	0.00245146	-0.350153	0.0464588	0.0719728	-0.299207	0.0684214	0.119915	-0.308041	0.189419	0.300775	-0.00316034	0.00790477	0.0218737	0.1258	0.00578499	0.0166463	-2.12198	7.46522e-10	5.33249e-09	-1.07869	0.00173076	0.00837011	-0.27938	0.755307	0.924545
ENSMUSG00000000901	Mmp11	0	0.0156113	8.34725e-08	2.94787e-07	0.0070759	0.0267134	0.0526175	-0.0281757	8.34725e-08	1.605e-06	-0.0545679	0.0645435	0.699438	-0.0126094	0.514347	0.967247	-0.0119775	0.766901	0.991497	0.827789	1.17176e-15	8.24221e-15	0.688297	5.0685e-11	2.48339e-10	1.51819	1.32533e-52	6.22595e-51	0.165372	4.88763e-06	2.65047e-05	0.619685	0.122256	0.215567	0.0390956	8.11342e-07	5.29649e-06	1.04007	0.0126122	0.027241	1.46367	1.18403e-08	2.15882e-07	1.39495	0.140245	0.459643
ENSMUSG00000000902	Smarcb1	0	-0.0011568	0.407111	0.457227	-0.0146681	9.51586e-06	6.42562e-05	-0.0160124	1.46912e-05	0.000113101	-0.0297204	0.35165	0.975922	0.0114972	0.743122	0.992424	0.0387481	0.386294	0.915985	-0.266851	1.80161e-05	5.21543e-05	-0.40047	2.05811e-10	9.55584e-10	0.585536	3.87018e-24	6.70924e-23	0.158215	6.38414e-07	3.98934e-06	0.256181	5.2176e-10	5.4302e-09	-0.0339847	0.0127295	0.0328353	-0.684502	0.00216683	0.00573243	0.0783897	1.68887e-08	3.01505e-07	0.500255	0.20273	0.553283
ENSMUSG00000000915	Hip1r	0	0.0066177	2.50417e-07	8.47626e-07	0.00962943	1.39399e-05	8.72902e-05	0.0131735	6.6778e-07	7.9123e-06	0.0825983	0.0448382	0.596347	0.0514389	0.10872	0.777303	0.054735	0.269382	0.848158	0.61751	2.04504e-15	1.41851e-14	0.849618	2.60145e-28	3.2193e-27	-0.188895	0.017975	0.0377512	0.0837827	7.37901e-07	4.55635e-06	-0.00939943	5.69509e-09	5.24377e-08	-0.0574074	2.44039e-08	1.97925e-07	0.28572	1.51554e-07	8.15207e-07	0.500021	0.000677259	0.00377344	-0.168489	0.784701	0.937024
ENSMUSG00000000916	Nsun5	0	0.00707339	8.34725e-07	2.49231e-06	0.00495612	0.0249718	0.0497401	-0.00172169	0.492682	0.619746	-0.00162111	0.937881	0.995105	-0.015874	0.413592	0.947475	0.0331613	0.417887	0.92636	0.713186	2.20582e-11	1.16096e-10	0.363561	0.000721848	0.0015811	0.210916	0.0441947	0.0824366	0.157951	0.000149943	0.000613444	0.16864	0.00019202	0.000825926	-0.01058	1.38969e-05	7.35945e-05	0.381504	0.901849	0.931167	0.662444	0.0231237	0.069371	0.182785	0.721015	0.914461
ENSMUSG00000000934	Top1mt	0	0.00979307	8.34725e-08	2.94787e-07	0.00147514	0.434049	0.534101	-0.0100481	6.60267e-05	0.000396458	0.00192976	0.918157	0.994332	-0.0140095	0.362838	0.933519	0.0154938	0.653334	0.983533	0.700742	2.40902e-07	8.80881e-07	0.597074	1.15751e-05	3.32194e-05	0.715059	7.11964e-08	3.82793e-07	0.171658	0.00360171	0.0105437	0.513151	0.311645	0.446287	-0.101423	0.000107142	0.000478185	0.286687	0.0899909	0.149623	0.889067	0.054662	0.135618	0.684556	0.651036	0.885418
ENSMUSG00000000938	Hoxa10	0	-0.00526499	1.00167e-06	2.94382e-06	-0.00641155	0.000405092	0.00149957	-0.00450612	0.0220544	0.0528803	-0.0237567	0.355585	0.975922	-0.027491	0.217001	0.883651	-0.113991	0.057516	0.487522	-0.322283	0.00253463	0.00520706	-0.884236	5.30677e-14	3.22689e-13	-0.167402	0.106797	0.174746	-0.15802	0.23947	0.360334	-0.25862	0.652364	0.759517	-0.0343731	0.0582145	0.118577	-0.29054	0.000150223	0.000506338	-0.451309	0.00336586	0.014651	-0.21925	0.518489	0.824612
ENSMUSG00000000957	Mmp14	0	-0.00891294	0.000815025	0.00146749	-0.00427135	0.360655	0.46152	0.0094898	0.0881998	0.162546	0.00175506	0.944361	0.995105	0.0243706	0.286804	0.914977	0.022949	0.599414	0.972762	-0.93929	2.90474e-10	1.3963e-09	-0.270721	0.0536097	0.0817764	-0.610871	1.40817e-05	5.55113e-05	0.405507	2.48341e-11	2.71183e-10	0.201756	8.91886e-09	8.00892e-08	0.208924	1.64991e-07	1.19205e-06	-0.960409	0.000473193	0.00145046	-0.243467	0.858596	0.917577	-0.309473	0.0188338	0.144344
ENSMUSG00000000959	Oxa1l	0	-0.00168935	0.266237	0.312212	-0.00519089	0.0776331	0.129162	0.00192322	0.570235	0.688802	-0.00708705	0.799541	0.991791	-0.00753705	0.751404	0.993	0.00381795	0.931259	0.993171	-0.613671	5.44759e-11	2.79591e-10	-0.0194528	0.826043	0.8627	-0.0448427	0.615288	0.708963	-0.0543995	8.51432e-06	4.4519e-05	-0.0362158	3.504e-06	2.11885e-05	-0.183652	0.00183357	0.00608093	-0.558358	2.01884e-05	7.8646e-05	0.22743	0.0320241	0.0891924	0.0256153	0.374195	0.722049
ENSMUSG00000000976	Heatr6	0	0.0036704	5.57596e-05	0.000121092	-0.000170267	0.909961	0.934776	0.00735395	0.000194825	0.000983898	0.00640239	0.802622	0.991791	0.0082593	0.698721	0.989445	-0.0109431	0.798856	0.992803	0.271194	0.00926162	0.0170553	0.364031	0.000468056	0.0010607	-0.12668	0.218787	0.315005	-0.0615906	0.0186956	0.0443651	-0.169012	0.00179632	0.00611311	0.0752706	0.205873	0.327293	-0.100134	0.00137493	0.00380816	0.174681	0.145591	0.27956	-0.0691075	0.476791	0.798261
ENSMUSG00000001016	Ilf2	0	-0.000798669	0.122484	0.153654	0.00139674	0.156536	0.231877	-0.00131664	0.253318	0.376288	-0.0331536	0.316424	0.968679	-0.0327075	0.264356	0.903078	0.00170346	0.992969	0.999309	0.00649722	0.915776	0.936237	-0.117925	0.0557752	0.0846181	-0.0486332	0.406036	0.516612	0.0631142	0.506105	0.627602	0.0479914	0.646316	0.75518	-0.0245092	0.822402	0.887288	0.200869	0.000255079	0.000825389	-0.0251943	0.304721	0.468612	0.0067993	0.510371	0.821103
ENSMUSG00000001017	Chtop	0	0.00450352	0.000129716	0.000265211	-0.0291735	8.34725e-08	1.29021e-06	0.0110935	3.83139e-05	0.000250388	-0.0232624	0.468429	0.975922	-0.00547465	0.803074	0.996545	0.0742187	0.111425	0.656115	0.284486	2.5238e-07	9.20882e-07	0.300214	5.20821e-08	1.94601e-07	0.0877752	0.109514	0.178461	-0.0812127	2.4658e-06	1.40389e-05	-0.0209726	6.7432e-05	0.000319024	-0.170785	1.18155e-07	8.72073e-07	-1.5288	6.85783e-105	1.39237e-102	-0.530771	8.01779e-26	8.13941e-24	-0.00265635	0.163532	0.497186
ENSMUSG00000001018	Snapin	0	-0.0036283	0.000815526	0.00146817	0.0116105	2.33723e-06	2.07083e-05	-0.0135253	9.18197e-07	1.04158e-05	-0.00843103	0.746714	0.987144	0.00377575	0.867201	0.997038	-0.00437525	0.917195	0.992809	-0.252975	0.00502316	0.00976983	-0.53905	1.61495e-08	6.31997e-08	0.012173	0.895319	0.926888	0.0334369	0.0188364	0.0446727	-0.063235	0.120716	0.213693	-0.0994757	0.207483	0.329262	0.627252	2.62984e-19	4.47484e-18	0.413284	1.20558e-13	4.45729e-12	0.18895	0.0526212	0.271937
ENSMUSG00000001020	S100a4	0	-0.0144787	8.34725e-08	2.94787e-07	0.00864157	8.51419e-06	5.92629e-05	0.00363182	0.0516205	0.10583	-0.0503701	0.133463	0.85664	-0.0184221	0.54603	0.970535	-0.0320863	0.444585	0.93416	-1.27363	6.64755e-120	5.49179e-118	-0.772301	2.41368e-46	5.0548e-45	-0.862884	1.1787e-57	6.00934e-56	0.0282012	3.07391e-65	4.66106e-63	-0.0747297	7.79492e-56	1.13872e-53	0.0412765	4.40155e-54	4.70769e-52	0.0813848	1.72321e-29	5.12216e-28	-0.362217	3.51127e-08	5.84853e-07	-0.284526	6.29157e-15	1.83821e-12
ENSMUSG00000001021	S100a3	0	-0.00583778	2.33723e-06	6.44217e-06	-0.00503161	0.0106513	0.0240786	-0.00333324	0.135753	0.230012	-0.00245701	0.795942	0.991791	0.00347481	0.682642	0.986893	0.0213111	0.295814	0.872435	-0.430651	0.114426	0.162753	-1.59749	1.5827e-05	4.47044e-05	-0.256391	0.263743	0.367704	-0.296004	0.591614	0.701345	-0.514183	0.724184	0.813256	-0.580118	0.588186	0.711053	-0.413278	0.00458567	0.0112335	-1.50082	0.571297	0.714555	-0.234159	0.637143	0.879106
ENSMUSG00000001025	S100a6	0	-0.0047829	5.84307e-06	1.48608e-05	0.0073887	0.000120534	0.000543392	-0.00872627	7.76294e-05	0.000452958	-0.00606633	0.850634	0.993609	-0.0016427	0.96323	0.99829	-0.206109	0.0007198	0.0266905	-0.355664	2.11887e-06	6.92927e-06	-0.387741	2.45857e-07	8.55146e-07	-0.145721	0.0481306	0.0887358	0.11565	5.65173e-06	3.03733e-05	0.0970692	1.16701e-05	6.3834e-05	0.0842674	0.00014185	0.000616776	0.351685	2.04881e-12	1.93554e-11	-0.0604334	0.00115713	0.00594137	0.12519	0.00261142	0.0371522
ENSMUSG00000001034	Mapk7	0	0.00476026	7.75459e-05	0.000164644	0.00657551	0.00238088	0.00671033	0.0153107	2.50417e-07	3.3819e-06	-0.0203173	0.388927	0.975922	-0.0175905	0.387309	0.940905	-0.0851918	0.101152	0.63222	0.0599406	0.603523	0.672146	0.531443	3.08599e-06	9.49091e-06	-0.261627	0.0217641	0.0447728	-0.0264693	0.572002	0.684859	-0.219705	0.0667335	0.131697	0.109507	0.768851	0.8505	0.181536	0.0257718	0.0511805	0.441074	0.509272	0.663611	-0.326088	0.427282	0.764399
ENSMUSG00000001036	Epn2	0	-0.00760888	8.34725e-08	2.94787e-07	-0.00935822	3.3389e-06	2.81865e-05	0.00632287	0.00145042	0.00540085	-0.0508187	0.130225	0.855892	-0.017332	0.263271	0.901381	-0.0302502	0.510569	0.956187	-0.834886	4.04527e-15	2.74863e-14	-0.48699	2.33131e-06	7.27259e-06	-0.354714	0.000369407	0.00114789	-0.0385983	3.02053e-08	2.25018e-07	-0.119318	4.5732e-07	3.2206e-06	-0.126964	6.66053e-06	3.69724e-05	-0.530876	0.75699	0.82041	-0.576932	0.481661	0.639386	-0.358278	0.964392	0.99151
ENSMUSG00000001039	B9d1	0	-0.000590718	0.541846	0.590715	0.00591513	0.00297529	0.00816331	-0.0019499	0.371124	0.502792	-0.0337563	0.0831641	0.747572	-0.00687471	0.625172	0.982569	-0.0426827	0.212454	0.808292	-0.104647	0.511012	0.587411	-0.328947	0.0454948	0.0706942	-0.175514	0.263715	0.367704	0.271567	0.0672508	0.130652	-0.0872441	0.91608	0.948218	0.161785	0.2124	0.335179	0.465958	0.000363201	0.00113955	0.175011	0.00949345	0.0341303	-0.0966549	0.305964	0.663588
ENSMUSG00000001052	Sec24b	0	0.00571112	0.00393548	0.00640357	0.00474327	0.186482	0.267929	0.00601519	0.154635	0.254726	0.0348095	0.16113	0.882017	0.0361127	0.0796099	0.702379	0.0408247	0.327827	0.894622	0.594401	0.0104202	0.0190289	0.689895	0.00345059	0.006743	0.210017	0.301451	0.408555	0.309144	0.258533	0.381235	0.264052	0.179122	0.292529	0.444501	0.574062	0.699311	0.0561297	0.0335768	0.0644164	0.255413	0.0564908	0.139182	0.178768	0.583156	0.855241
ENSMUSG00000001053	N4bp3	0	-0.0160893	8.34725e-08	2.94787e-07	0.00711552	0.00289658	0.00797291	-0.0051133	0.0557921	0.112723	0.0412932	0.0802781	0.745509	0.0128342	0.438727	0.952244	-0.012371	0.72347	0.990149	-1.20579	2.79774e-10	1.34757e-09	-1.6802	3.69977e-16	2.61164e-15	-0.926548	2.30164e-07	1.16041e-06	-0.679277	0.0192452	0.0454353	-0.182576	1.82631e-05	9.67168e-05	-0.0911648	2.25523e-05	0.000115018	-0.0433234	3.60106e-10	2.65133e-09	-0.878542	0.000801564	0.0043665	-0.817494	0.200405	0.548962
ENSMUSG00000001054	Rmnd5b	0	-0.00569915	8.34725e-08	2.94787e-07	-0.00323252	0.00973606	0.022294	0.00393523	0.00754783	0.0217606	0.0371231	0.308913	0.968679	0.0123639	0.613759	0.978957	0.0637816	0.209117	0.806634	-0.301924	0.000258892	0.00063668	-0.326878	7.97724e-05	0.000205107	-0.309306	0.000125778	0.000425139	-0.212541	0.420483	0.549048	-0.222445	0.467578	0.601268	-0.140945	0.18682	0.30324	-0.240073	0.442657	0.551607	-0.508261	0.093856	0.203862	-0.313635	0.954382	0.989776
ENSMUSG00000001056	Nhp2	0	0.00288279	1.33556e-06	3.8794e-06	-0.000788091	0.378634	0.480014	-0.00602994	2.08681e-06	2.09188e-05	-0.0230721	0.470514	0.975922	0.003205	0.942296	0.997038	-0.0373519	0.401463	0.921982	0.303887	1.38914e-08	5.77193e-08	0.090125	0.100481	0.142496	0.243258	4.38591e-06	1.86639e-05	0.186312	0.115223	0.203104	0.0773804	0.00224015	0.00737623	0.118408	0.0255471	0.0593824	0.162453	0.342768	0.452604	0.0844347	0.938481	0.966378	0.306144	0.313348	0.669208
ENSMUSG00000001062	Vps9d1	0	0.00322488	0.000828881	0.00149087	-0.00457916	0.00973723	0.022294	0.00462961	0.024073	0.0568107	0.00699309	0.697257	0.986078	-0.00938256	0.520381	0.9675	0.0133066	0.690296	0.987136	0.175716	0.254197	0.326524	0.406683	0.00806083	0.0146637	0.173103	0.235025	0.334287	0.0810508	0.621561	0.725318	0.268076	0.619163	0.732756	0.129383	0.825302	0.889455	-0.399243	0.000244179	0.000793979	0.315943	0.579275	0.719803	0.0689828	0.208024	0.56036
ENSMUSG00000001065	Zfp276	0	0.00172669	0.141406	0.175498	0.00151245	0.496558	0.592643	0.00215053	0.409601	0.540737	-0.00785403	0.650127	0.985617	-0.00579992	0.684492	0.986893	-0.0552873	0.128523	0.696526	0.145642	0.328659	0.406044	-0.0393973	0.79481	0.837309	0.00318842	0.982947	0.988482	-0.236731	0.0533496	0.107564	-0.00610395	0.410414	0.548333	0.124906	0.93525	0.961744	0.196899	0.239835	0.338316	-0.0669483	0.865343	0.921335	-0.169894	0.0799134	0.344296
ENSMUSG00000001082	Mfsd10	0	-0.000380148	0.689662	0.727561	0.00470335	0.0135129	0.0294365	0.00347155	0.110451	0.194429	-0.00639633	0.794961	0.991791	0.00958579	0.650618	0.982569	0.041122	0.358128	0.904923	-0.0451282	0.719107	0.774935	0.193138	0.122875	0.170027	-0.0883982	0.465672	0.575793	0.187239	0.158053	0.262051	-0.0935749	0.761867	0.841687	0.0155456	0.734746	0.8246	0.296954	0.536747	0.637081	0.0548719	0.347095	0.512872	-0.0198567	0.39757	0.742167
ENSMUSG00000001089	Luzp1	0	0.00269077	1.60267e-05	3.77624e-05	0.000577714	0.566624	0.656376	0.000927702	0.432594	0.564622	-0.00836653	0.77291	0.988754	0.0265556	0.334721	0.927416	0.00717787	0.88398	0.992809	0.168063	0.0159075	0.0279942	0.284265	4.10549e-05	0.000109929	0.144942	0.0342173	0.0660684	0.150173	0.852129	0.901816	0.0884263	0.398698	0.537113	0.137361	0.772023	0.852278	0.0410785	0.0123592	0.0267385	0.101202	0.0478667	0.122259	0.144598	0.996452	0.998775
ENSMUSG00000001098	Kctd10	0	0.0027379	0.000599833	0.00110358	-0.00215082	0.125184	0.192573	0.0005149	0.750751	0.834253	-0.0262724	0.441782	0.975922	-0.00791222	0.779675	0.993002	0.0028386	0.949309	0.99369	-0.0257435	0.678818	0.738829	0.302514	1.00884e-06	3.27947e-06	0.226529	0.000218393	0.000709748	0.015018	0.635931	0.736519	0.11183	0.107404	0.194145	-0.101719	0.428452	0.570207	0.0155855	0.000959173	0.00275274	0.0405015	0.00188748	0.00902238	0.150202	0.266658	0.626333
ENSMUSG00000001100	Poldip2	0	0.0012625	0.0314555	0.0440863	0.004354	0.000376127	0.00141286	-0.00819928	4.17362e-07	5.4108e-06	-0.00749369	0.785453	0.990041	0.034418	0.218052	0.884213	0.0067008	0.883627	0.992809	0.120367	0.0959305	0.139106	0.032928	0.774979	0.820457	0.340407	1.34649e-06	6.21385e-06	0.175808	0.575102	0.687422	0.156715	0.708261	0.801764	0.0694462	0.749328	0.835773	0.345263	0.00188937	0.00505706	0.198521	0.0562942	0.138841	0.259865	0.277544	0.639765
ENSMUSG00000001105	Ift20	0	-0.00962679	6.6778e-07	2.03857e-06	0.0182145	1.41903e-06	1.38538e-05	-0.0113612	0.00175843	0.00635039	-0.00217702	0.92988	0.995105	-0.00848452	0.699035	0.989445	-0.00559342	0.896805	0.992809	-0.469667	1.01302e-05	3.03373e-05	-1.23097	8.14359e-26	9.0159e-25	-0.412167	6.08506e-05	0.000216428	-0.0605337	0.00374909	0.0109006	-0.0716957	0.0042557	0.0128735	0.0805512	0.000419191	0.00163228	0.751865	2.96156e-38	1.24044e-36	0.482419	7.32461e-29	9.23595e-27	-0.369981	0.593759	0.861665
ENSMUSG00000001119	Col6a1	0	-0.0142367	9.18197e-07	2.7212e-06	0.0213746	3.76461e-05	0.000201773	0.0167029	0.00225968	0.00790559	0.698165	4.52219e-14	4.51352e-11	0.714915	1.3203e-14	1.67112e-11	1.28243	8.63087e-36	2.5843e-32	-0.773227	1.40942e-12	8.07435e-12	0.255423	0.0104687	0.0186281	-0.79544	8.19096e-14	7.51298e-13	0.0168768	2.6031e-08	1.95624e-07	-0.152653	7.92951e-06	4.47421e-05	-0.0773045	4.00948e-06	2.30468e-05	0.150503	0.421822	0.530834	0.101109	0.207694	0.35948	-0.722936	0.361726	0.712738
ENSMUSG00000001120	Pcbp3	0	-0.00390923	0.00379733	0.00618971	-0.0130825	1.16861e-05	7.55469e-05	0.00970582	0.00159566	0.00587052	-0.0128248	0.463836	0.975922	-0.00708233	0.608578	0.978503	-0.0302621	0.355121	0.904306	-0.405084	0.0142674	0.0253951	-0.355729	0.0310625	0.0499795	-0.696446	3.01177e-05	0.00011285	0.00609345	0.0490971	0.100604	-0.12403	0.162664	0.27142	-0.164208	0.297145	0.433241	-1.10558	0.00158044	0.00431453	-0.556479	0.253275	0.412842	-0.454049	0.034624	0.211074
ENSMUSG00000001123	Lgals9	0	-0.00801241	8.34725e-08	2.94787e-07	0.0128304	3.3389e-07	3.89073e-06	0.00233473	0.29222	0.42033	-0.0338682	0.249148	0.94182	0.00783192	0.732	0.990871	-0.0798899	0.134185	0.703504	-0.890439	1.46615e-19	1.27714e-18	-0.363576	8.30969e-05	0.000213015	-0.671296	5.25827e-13	4.49278e-12	-0.0156166	3.00015e-11	3.25238e-10	0.00452953	4.20836e-12	5.55197e-11	-0.133956	1.65196e-07	1.19282e-06	0.49029	1.52383e-11	1.32756e-10	-0.211399	0.191384	0.33829	-0.122397	5.61566e-06	0.000270161
ENSMUSG00000001127	Araf	0	-0.00245257	0.0150278	0.0221998	0.00111277	0.54863	0.640924	-0.00956807	9.94992e-05	0.000558791	0.0171229	0.519584	0.978407	-0.018985	0.394486	0.942235	0.00873855	0.840846	0.992803	0.00357917	0.976717	0.982217	-0.509008	1.0632e-06	3.44589e-06	0.169545	0.0800528	0.137013	-0.20405	0.132415	0.227086	-0.0442233	0.736209	0.822509	-0.0134637	0.97554	0.985259	0.168886	1.83077e-06	8.42194e-06	0.0332127	8.20562e-05	0.000608262	-0.0366366	0.0374255	0.220488
ENSMUSG00000001128	Cfp	0	-0.00386151	2.07012e-05	4.7928e-05	-0.00100339	0.496645	0.592643	0.000557436	0.746275	0.830821	-0.000191736	0.975034	0.996508	-0.00244725	0.641007	0.982569	0.00767168	0.572761	0.96604	-1.11871	0.0137157	0.0245188	-1.16071	0.012739	0.0222417	-0.629787	0.0508574	0.0930677	-0.847714	0.272741	0.39761	-0.493796	0.0459625	0.0968316	-0.987984	0.597014	0.717748	-0.740759	0.203725	0.295773	-1.0179	0.286334	0.449305	-0.602463	0.353312	0.705976
ENSMUSG00000001131	Timp1	0	4.5384e-05	0.97491	0.979571	0.00103431	0.709367	0.77816	-0.0255357	8.34725e-08	1.605e-06	-0.0218119	0.472077	0.975922	-0.0291172	0.339275	0.927846	0.127906	0.00515374	0.114308	0.120941	0.00915602	0.0168842	-0.388165	2.77318e-16	1.96641e-15	0.869917	4.04575e-82	3.58993e-80	-0.11851	0.000295899	0.00113754	0.0185727	0.112367	0.201474	0.0689747	0.468269	0.606028	0.700393	1.5789e-61	1.27795e-59	-0.0570438	3.8579e-07	5.18673e-06	0.577353	1.54983e-06	8.40062e-05
ENSMUSG00000001134	Uxt	0	0.000311433	0.693296	0.730687	0.0030633	0.0479536	0.0857111	-0.0113154	5.00835e-07	6.14703e-06	-0.0153924	0.428445	0.975922	-0.0244061	0.149377	0.823805	-0.0322027	0.375696	0.909879	-0.0852275	0.518372	0.593436	-0.304901	0.0318689	0.0511328	0.290716	0.023071	0.0471294	0.167758	0.158916	0.263044	0.114582	0.249001	0.377143	-0.0286437	0.731829	0.822265	0.379478	0.000320633	0.00101583	0.247672	0.00206907	0.00972357	0.295798	0.945682	0.988652
ENSMUSG00000001138	Cnnm3	0	-0.00396534	0.00131494	0.00229182	0.00129301	0.552836	0.644706	-0.00500192	0.0558449	0.112755	-0.0121662	0.209113	0.914124	-0.00814181	0.297149	0.916473	-0.00192098	0.915151	0.992809	-0.65989	0.0221478	0.0378013	-1.04718	0.00105019	0.0022349	-0.677311	0.0124743	0.0274919	-0.168659	0.0962591	0.175241	-0.0567218	0.0471761	0.0989881	-0.620084	0.873959	0.921824	0.261931	0.00142718	0.0039383	-0.499241	0.0365471	0.0989374	0.37404	0.00208785	0.0314997
ENSMUSG00000001143	Lman2l	0	0.00179618	0.139429	0.173242	0.00808835	0.00127062	0.00394422	0.00258481	0.33913	0.470177	-0.0104498	0.635044	0.984555	0.00183936	0.905939	0.997038	-0.0546647	0.19038	0.780885	0.128223	0.349887	0.428466	0.227611	0.0925845	0.132505	-0.0933842	0.476421	0.585158	-0.101878	0.190476	0.302053	0.0522992	0.655062	0.761609	0.168579	0.834162	0.894978	0.555468	0.074538	0.127775	-0.0127855	0.132768	0.261613	-0.0544986	0.612398	0.8698
ENSMUSG00000001150	Mcm3ap	0	-0.00515898	1.66945e-07	5.72198e-07	6.90031e-05	0.960493	0.971053	0.00166926	0.30916	0.439055	-0.0202969	0.462893	0.975922	-0.0595949	0.0625093	0.660789	-0.0416093	0.376648	0.909879	-0.549067	2.81009e-09	1.24859e-08	-0.480483	1.6191e-07	5.75355e-07	-0.348322	7.92352e-05	0.00027659	-0.224517	0.00877954	0.0228929	-0.258229	0.0176315	0.0435664	-0.0797742	0.000609342	0.00228675	-0.0914334	0.00187651	0.00502542	-0.188824	0.0142274	0.0471581	-0.285666	0.427494	0.764664
ENSMUSG00000001151	Pcnt	0	-0.0103658	8.34725e-08	2.94787e-07	-0.00937835	2.65442e-05	0.000150271	0.0101162	5.06678e-05	0.000315462	-0.0132081	0.580582	0.982596	0.00254202	0.899396	0.997038	-0.0465326	0.29315	0.870799	-0.674211	6.3154e-07	2.19919e-06	-0.794753	4.89117e-09	2.00793e-08	-0.77548	7.29767e-09	4.39732e-08	-0.180187	0.00521873	0.0145689	-0.442305	0.167678	0.277241	-0.0926216	0.0030871	0.00966806	-0.657046	0.41687	0.52615	-0.95538	0.297257	0.460294	-0.732404	0.569601	0.848478
ENSMUSG00000001156	Mxd1	0	0.00511585	0.00810434	0.0125186	0.0137925	0.000450584	0.00163711	0.0144562	0.00123063	0.00469035	-0.00280532	0.805636	0.992811	-0.00862016	0.357056	0.93153	-0.0363761	0.110608	0.654826	0.498268	0.0233993	0.0397025	0.576149	0.00960067	0.0172037	-0.905708	0.000145523	0.00048775	-0.190689	0.0147171	0.0361486	-0.310535	0.00554528	0.0161505	0.0987151	0.161469	0.270107	0.75592	0.466105	0.574177	0.280884	0.146132	0.280216	-0.812879	0.132209	0.447257
ENSMUSG00000001157	Gmcl1	0	0.00151172	0.17094	0.208948	0.0052911	0.0151697	0.0325601	0.00191509	0.435528	0.567394	0.00261994	0.812911	0.993609	0.0123066	0.190339	0.851803	0.00960754	0.665185	0.985431	0.178187	0.448779	0.527118	0.41405	0.0846331	0.122531	0.0476051	0.818571	0.871442	0.0103975	0.503373	0.624926	-0.0682716	0.308572	0.442839	0.0627276	0.66895	0.773638	0.359101	0.843545	0.888724	0.20707	0.279963	0.442822	0.059956	0.815266	0.948213
ENSMUSG00000001158	Snrnp27	0	0.00556776	8.34725e-07	2.49231e-06	0.00403093	0.0206199	0.0422594	-0.00523246	0.0113508	0.0304051	-0.0929402	0.0313211	0.489091	-0.0552671	0.060622	0.654117	-0.0343845	0.441442	0.934127	0.319537	0.000621105	0.00142999	0.200045	0.0341265	0.0544633	0.21509	0.020582	0.0425676	0.245587	0.560551	0.674777	0.104234	0.084391	0.159526	-0.0240395	0.0202129	0.0486596	0.554952	0.00643051	0.0151279	0.436005	0.0418455	0.109999	0.365397	0.0924365	0.370333
ENSMUSG00000001173	Ocrl	0	-0.00452951	0.000329633	0.000630677	0.0010408	0.631629	0.7138	-0.00478067	0.0661637	0.128727	0.021138	0.319632	0.969531	0.0308905	0.105807	0.769428	0.0780492	0.0954726	0.620957	-0.237987	0.108955	0.155879	-0.289464	0.0527906	0.0806538	0.0927841	0.504149	0.611689	0.0499622	0.12609	0.217987	-0.0499944	0.298716	0.432634	-0.214215	0.906026	0.942125	-0.0535309	0.219379	0.314384	-0.107857	0.266908	0.428476	0.019368	0.354423	0.706771
ENSMUSG00000001175	Calm1	0	-0.00390033	6.09349e-06	1.54093e-05	0.0069783	2.12855e-05	0.000124501	-0.00647552	0.000257095	0.00124233	-0.052126	0.0956484	0.777054	-0.102271	0.00312326	0.148442	-0.0948682	0.0191119	0.269298	-0.369024	1.02867e-18	8.57513e-18	-0.379532	1.07613e-19	9.2741e-19	-0.0639099	0.11947	0.192175	-0.0249161	3.70378e-09	3.10263e-08	-0.0640285	1.56065e-07	1.18248e-06	0.0138791	3.75425e-09	3.34614e-08	0.434046	4.87968e-44	2.4055e-42	0.0154656	1.03613e-11	3.0571e-10	0.0148632	0.1375	0.456012
ENSMUSG00000001211	Agpat3	0	0.00107817	0.123455	0.154806	-0.00159969	0.229235	0.318082	0.00199207	0.202613	0.31662	-0.00327699	0.883713	0.993918	0.00736718	0.696436	0.989445	-0.00852716	0.82621	0.992803	-0.140007	0.228066	0.297409	0.218336	0.0530758	0.081055	0.0988413	0.365637	0.475859	0.0192092	0.276849	0.40213	-0.140178	0.984975	0.992097	-0.0895199	0.76243	0.845975	-0.0722922	0.062382	0.109829	-0.00852937	0.104679	0.220416	0.0814405	0.82425	0.950673
ENSMUSG00000001228	Uhrf1	0	-0.0147464	8.34725e-08	2.94787e-07	0.0071141	0.000482053	0.00172838	0.00172771	0.420242	0.55168	-0.0267023	0.387645	0.975922	-0.0196913	0.483941	0.957884	-0.0510974	0.274057	0.851782	-0.868022	2.60545e-29	3.57101e-28	-1.09477	1.34016e-44	2.68907e-43	-0.919099	4.37343e-33	1.10061e-31	-0.133354	4.65874e-12	5.47664e-11	-0.240833	2.66297e-09	2.55402e-08	-0.145728	8.53864e-10	8.20244e-09	0.249595	1.03665e-35	4.08486e-34	-0.704665	0.000172248	0.00116772	-0.564223	0.000218915	0.00560337
ENSMUSG00000001229	Dpp9	0	0.000149957	0.825143	0.850458	-0.0129936	8.34725e-08	1.29021e-06	0.00373503	0.0187643	0.0461082	-0.0553729	0.149528	0.874509	-0.088049	0.0331018	0.526836	-0.134091	0.0264281	0.330203	-0.079543	0.329545	0.407055	-0.0971555	0.217686	0.279972	-0.0494954	0.514504	0.620482	-0.0641492	0.886002	0.926476	0.0977743	0.106038	0.192167	0.0600129	0.23968	0.368661	-0.597825	1.25112e-05	5.0513e-05	-0.319161	0.0403849	0.107195	-0.0904744	0.568851	0.848478
ENSMUSG00000001248	Gramd1a	0	0.000781733	0.651295	0.693067	0.0119261	0.00104566	0.00333492	0.00597417	0.129593	0.221454	0.0194726	0.133236	0.85664	0.0108004	0.284293	0.913106	0.0219334	0.372276	0.908589	0.011868	0.972121	0.979397	0.854996	0.00254141	0.00508239	0.13657	0.656291	0.744507	0.232325	0.394194	0.523567	0.331683	0.228258	0.352676	0.0699914	0.79542	0.868106	0.328705	0.103183	0.167802	0.55943	0.148578	0.283681	0.102161	0.477139	0.798461
ENSMUSG00000001270	Ckb	0	-0.010426	8.34725e-08	2.94787e-07	0.0139762	3.3389e-07	3.89073e-06	0.00839973	0.00117896	0.0045222	0.00766645	0.762414	0.987551	0.00486891	0.820628	0.997038	-0.0183202	0.665426	0.985431	-0.81641	8.2044e-12	4.44708e-11	-0.564214	1.65917e-06	5.26915e-06	-0.913404	1.25159e-14	1.22792e-13	-0.300519	0.000962511	0.00326656	-0.292091	0.000675323	0.00255115	-0.19991	0.000364825	0.00144232	0.48404	4.72103e-11	3.86556e-10	-0.453214	0.418868	0.585009	-0.805364	0.214023	0.568089
ENSMUSG00000001280	Sp1	0	0.000513517	0.54158	0.590478	-0.0142085	8.34725e-08	1.29021e-06	0.0105094	3.83973e-06	3.59345e-05	-0.00800698	0.766994	0.987826	-0.0228791	0.317801	0.924442	-0.0312875	0.49421	0.953677	0.109068	0.266549	0.339824	0.0260378	0.792426	0.835532	-0.349173	0.000409052	0.00126192	-0.110162	0.099945	0.180661	-0.000417249	0.400999	0.539485	-0.127195	0.110318	0.200269	-0.81029	7.38122e-09	4.67581e-08	-0.451382	0.000375631	0.00229342	-0.278766	0.3744	0.722211
ENSMUSG00000001281	Itgb7	1	0.0365525	8.34725e-08	2.94787e-07	0.0331551	0.000321369	0.00123896	0.00275667	0.773065	0.85006	0.00165873	0.842613	0.993609	0.0118725	0.0817597	0.708564	-0.012346	0.430434	0.929122	3.02446	1.68165e-06	5.56631e-06	3.6944	1.46325e-08	5.74698e-08	2.0368	0.000387977	0.00120061	2.69605	0.158547	0.26258	2.69134	0.119073	0.211318	2.87448	0.49841	0.634575	2.87786	0.0469629	0.0861251	3.53584	0.190074	0.336791	2.02427	0.596854	0.863184
ENSMUSG00000001285	Myg1	0	-0.00269837	0.0140047	0.0207806	0.000477976	0.812447	0.861952	-0.00524676	0.0316598	0.0711144	-0.0211028	0.491186	0.977059	-0.0248089	0.373964	0.936613	-0.00549924	0.899861	0.992809	0.151219	0.0416938	0.0666289	-0.485977	7.22038e-10	3.19634e-09	-0.219527	0.00508303	0.0124189	-0.0786996	0.0271745	0.0612576	0.0351915	0.230999	0.355843	-0.088318	0.0372618	0.0815012	0.218128	6.97279e-11	5.62093e-10	-0.196231	0.00607477	0.0238981	-0.0365347	0.0400316	0.230103
ENSMUSG00000001288	Rarg	0	-0.00120202	0.305036	0.352842	-0.00207555	0.354548	0.455114	0.0087506	0.00192346	0.00685135	-0.0746181	0.063609	0.699032	-0.0103079	0.652859	0.982739	-0.00433385	0.923427	0.992809	-0.489851	4.27994e-09	1.86367e-08	0.136529	0.0805925	0.117276	-0.323238	5.45154e-05	0.000195404	0.102626	1.2079e-07	8.43696e-07	0.116045	6.64891e-08	5.34187e-07	-0.108591	0.00179041	0.00596754	-0.337395	2.38981e-05	9.17842e-05	0.0491873	0.396323	0.563374	-0.0444488	0.00330707	0.044263
ENSMUSG00000001289	Pfdn5	0	-0.000488541	0.444089	0.494998	0.00684989	7.09516e-06	5.07723e-05	0.000549124	0.700685	0.796603	-0.0339208	0.317356	0.968679	-0.0165909	0.375466	0.937602	-0.164547	0.00984492	0.175465	-0.200858	0.00370569	0.00740457	0.0161112	0.814202	0.853011	-0.127042	0.0598144	0.10701	0.140552	0.00032928	0.00125181	0.0849551	0.00236297	0.00772966	0.13716	0.001411	0.00485701	0.273115	0.00673631	0.015776	0.198909	0.0448437	0.116072	-0.0361994	0.214477	0.56849
ENSMUSG00000001300	Efnb2	0	-0.00643113	4.18197e-05	9.27185e-05	-0.00397858	0.128185	0.196284	0.000819233	0.786366	0.859634	-0.00714749	0.581751	0.982596	0.00572865	0.604272	0.978136	-0.0299948	0.230767	0.821125	-0.881756	0.000424221	0.00100589	-0.781254	0.0014043	0.0029266	-0.0553446	0.773076	0.835732	-0.0513754	0.00602839	0.0164985	-0.598714	0.234404	0.359769	-0.112803	0.0170622	0.0421593	-0.118288	0.0278308	0.0547879	-1.07308	0.150773	0.2867	-0.210453	0.0465058	0.253455
ENSMUSG00000001305	Rrp15	0	0.00868284	8.34725e-08	2.94787e-07	-0.00912367	3.17195e-05	0.000175262	-0.00651961	0.00431235	0.0136013	0.00810958	0.759878	0.987211	0.0148574	0.521795	0.967572	0.0398261	0.367658	0.906992	0.446989	1.50393e-08	6.2273e-08	0.626169	1.14357e-15	7.79226e-15	0.795928	2.37854e-25	4.34338e-24	0.182956	0.0149252	0.036564	0.156047	0.00650735	0.0184895	0.024543	0.000463549	0.00178491	-0.325941	5.50755e-17	8.06539e-16	0.434157	0.0613285	0.148355	0.629192	0.0461319	0.252566
ENSMUSG00000001313	Rnd2	0	0.00809169	5.00835e-07	1.59054e-06	-0.00369498	0.1127	0.176084	0.0112741	0.000186394	0.000945306	-0.00202345	0.847526	0.993609	0.00923243	0.293564	0.915844	-0.00929378	0.646392	0.980572	0.887521	0.000197453	0.000495971	0.971551	5.22097e-05	0.000138001	0.174915	0.386668	0.497304	0.278421	0.0310785	0.0687007	-0.287319	0.000247703	0.00103604	0.0501414	0.0116574	0.0305232	-0.0814676	0.00133434	0.00370688	-0.0832443	0.000616235	0.00348202	0.104363	0.20934	0.561631
ENSMUSG00000001323	Srr	0	-0.000425479	0.710579	0.746923	0.00175251	0.4265	0.527194	-0.00350603	0.178265	0.285563	-0.0172726	0.28718	0.962114	-0.517579	0.00174865	0.0961426	-0.0281476	0.355682	0.904306	-0.223144	0.201072	0.266745	-0.329363	0.0644619	0.096211	-0.17166	0.290084	0.396227	0.0915486	0.146503	0.245966	0.682336	0.000181322	0.000783852	-0.0520371	0.461303	0.599798	0.120541	0.0542937	0.0975674	0.400989	0.00157226	0.00773477	-0.094731	0.296792	0.657723
ENSMUSG00000001333	Sync	0	0.0180602	8.34725e-08	2.94787e-07	0.0288305	8.34725e-08	1.29021e-06	0.0121219	0.00259558	0.00886834	0.00653126	0.436515	0.975922	0.0077228	0.252888	0.895047	0.00476709	0.774506	0.991588	1.48318	1.08379e-06	3.67366e-06	2.08735	2.40268e-11	1.20577e-10	0.453137	0.0647022	0.114249	0.87664	0.0505787	0.102999	0.856211	0.0393214	0.0851311	0.908951	0.0798231	0.154194	1.2955	0.0241908	0.0484262	1.6191	0.052733	0.131877	0.418774	0.459806	0.789115
ENSMUSG00000001349	Cnn1	0	0.0129007	7.76294e-06	1.9289e-05	0.0206163	0.000104007	0.000479191	0.00693748	0.198769	0.311891	0.0146463	0.571856	0.982596	0.149881	0.0119932	0.328226	-0.485515	3.58557e-05	0.00229649	0.479264	1.98639e-08	8.11838e-08	1.47241	2.41948e-73	9.23025e-72	0.504467	1.5403e-09	9.84067e-09	0.771574	0.0102633	0.0262924	0.608544	0.233952	0.359388	0.164639	0.0213459	0.0509672	0.772732	8.64179e-10	6.11098e-09	1.17311	0.00564225	0.0224574	0.11799	0.000307534	0.00729496
ENSMUSG00000001366	Fbxo9	0	0.0154205	2.50417e-07	8.47626e-07	0.00860333	0.046345	0.0835214	0.00375818	0.447811	0.578614	0.00406197	0.628208	0.984555	0.00814889	0.228427	0.886686	0.00733991	0.655156	0.984086	1.25308	4.19068e-05	0.000115963	1.61953	2.62754e-07	9.10576e-07	0.795213	0.00413354	0.0103029	0.761136	0.0969814	0.176101	0.575356	0.0315679	0.0710011	0.768457	0.125825	0.222342	0.598426	0.00716945	0.0166666	0.597603	0.00366161	0.0156988	0.766767	0.543395	0.837792
ENSMUSG00000001376	Vps50	0	0.00018158	0.845598	0.868509	-0.00320319	0.0783401	0.130176	0.00133845	0.523303	0.647654	-0.0107919	0.692993	0.986078	-0.0295891	0.247786	0.89313	-0.0169947	0.706426	0.987532	-0.165614	0.128259	0.180161	-0.057057	0.598505	0.663903	-0.113663	0.280728	0.386578	-0.25333	0.545613	0.661998	-0.104019	0.66381	0.768877	-0.163366	0.988201	0.992843	-0.18651	0.38477	0.494492	0.112604	0.203906	0.354616	-0.0454741	0.403042	0.746219
ENSMUSG00000001380	Hars	0	0.00711144	8.34725e-08	2.94787e-07	-0.00264632	0.0400533	0.0738946	-0.00591815	0.000299332	0.00141281	0.0614932	0.0935925	0.770268	0.0330353	0.266233	0.904956	0.108606	0.0323854	0.36731	0.729133	6.00874e-48	1.48716e-46	0.425232	4.25672e-17	3.1694e-16	0.518186	2.14288e-25	3.925e-24	-0.0276522	1.66294e-26	5.91109e-25	0.138806	3.45284e-17	7.96947e-16	-0.147731	2.8944e-27	1.09031e-25	0.163243	0.000415016	0.00128662	0.137921	3.89112e-05	0.000317735	0.345388	0.00396023	0.0500418
ENSMUSG00000001383	Zmat2	0	-0.00485154	1.08514e-06	3.18523e-06	-0.000522793	0.725777	0.791595	0.0007403	0.671097	0.771169	-0.0384884	0.20523	0.91405	-0.0223028	0.332633	0.927416	-0.0272496	0.641911	0.978675	-0.285535	0.0016294	0.00347305	-0.532116	1.05022e-08	4.1782e-08	-0.385264	1.72807e-05	6.71401e-05	-0.136428	0.222948	0.341417	-0.256613	0.809107	0.874913	-0.157441	0.340531	0.480984	0.0573179	3.68321e-06	1.61262e-05	-0.374702	0.177016	0.320217	-0.238724	0.0951099	0.375524
ENSMUSG00000001403	Ube2c	0	0.000392385	0.609923	0.655447	-0.0125884	8.34725e-08	1.29021e-06	0.00711184	0.000225292	0.00111015	-0.0330677	0.31975	0.969531	-0.0406002	0.194481	0.855732	-0.0406376	0.344408	0.900489	-0.0356677	0.541432	0.615586	-0.121908	0.0376982	0.0595997	-0.108073	0.0618274	0.10987	-0.0699103	0.673509	0.765444	-0.205642	0.0355547	0.0783643	-0.124837	0.323978	0.462843	-0.753541	4.82641e-14	5.3434e-13	-0.115799	0.938227	0.966215	-0.291818	0.0137338	0.119716
ENSMUSG00000001415	Smg5	0	0.00884992	0.0139051	0.0206482	0.00545868	0.409583	0.510674	0.00403617	0.601576	0.715469	0.016019	0.16527	0.886586	0.0245926	0.0122078	0.330171	0.00994409	0.657006	0.984439	1.0018	0.00303273	0.00614602	1.11125	0.00131282	0.00274838	0.561824	0.0448485	0.0835001	0.731584	0.315208	0.442658	0.68858	0.222799	0.346342	0.901799	0.714205	0.809372	-0.0100187	0.008888	0.0200999	0.278894	0.0134016	0.0448806	0.522528	0.338664	0.691274
ENSMUSG00000001416	Cct3	0	0.00513467	8.34725e-08	2.94787e-07	-0.003013	0.0129944	0.028508	-0.00253121	0.0691609	0.133465	0.0271658	0.355969	0.975922	-0.00170313	0.84731	0.997038	0.0411629	0.275517	0.854224	0.560201	4.41636e-46	1.02725e-44	0.270801	7.48481e-12	3.91189e-11	0.272713	3.80481e-12	3.05277e-11	0.037748	4.77744e-21	1.22809e-19	0.0965771	4.78423e-17	1.09162e-15	-0.0460109	1.23499e-22	3.55625e-21	0.0851313	0.000852611	0.00247598	0.0566438	9.98116e-05	0.000723317	0.192839	0.111991	0.410885
ENSMUSG00000001418	Glmp	0	0.00247689	0.00612387	0.00964854	0.0114639	1.66945e-07	2.11847e-06	0.0116022	1.00167e-06	1.08687e-05	-0.0330971	0.288715	0.963335	-0.0100499	0.670937	0.986893	-0.000834591	0.981929	0.998066	-0.0574361	0.438011	0.516685	0.421479	5.18064e-10	2.32517e-09	-0.274938	7.02179e-05	0.00024754	0.0308604	0.355029	0.484108	-0.00518396	0.578546	0.698771	-0.0365017	0.842252	0.900431	0.386613	0.686753	0.765977	0.499579	0.385222	0.552909	-0.271962	0.966182	0.991839
ENSMUSG00000001419	Mef2d	0	0.00698909	8.34725e-07	2.49231e-06	0.00288938	0.173021	0.251928	0.0173557	1.66945e-07	2.59046e-06	0.0409301	0.109813	0.816109	0.016311	0.367736	0.934663	0.109062	0.052137	0.462552	0.731877	1.0329e-08	4.33994e-08	1.07284	3.29674e-17	2.47131e-16	-0.111117	0.377624	0.488348	0.258847	0.00515321	0.0144061	0.133998	0.000452994	0.00178736	-0.0170896	9.49385e-05	0.000427866	-0.0485202	3.96726e-10	2.90488e-09	0.215119	7.22792e-07	9.11402e-06	-0.149234	0.623727	0.874309
ENSMUSG00000001424	Snd1	0	0.000281441	0.746068	0.77938	-0.0176677	8.34725e-08	1.29021e-06	0.00394815	0.0492206	0.101992	-0.0109438	0.767275	0.987826	-0.00429851	0.823898	0.997038	0.0210874	0.634277	0.97563	0.241816	6.18643e-05	0.000166683	-0.158381	0.00897483	0.0161741	-0.146502	0.0151408	0.0325623	-0.107694	3.51268e-05	0.000164755	-0.0462499	0.000834664	0.00308404	-0.104607	0.000192556	0.000809342	-0.844196	4.69413e-15	5.82704e-14	-0.449715	0.000514825	0.00299373	-0.0515602	0.16763	0.502524
ENSMUSG00000001435	Col18a1	1	0.0146338	5.34224e-06	1.37092e-05	-0.00891263	0.0814836	0.134429	0.00764272	0.199284	0.312341	-1.0095	9.08268e-36	3.62611e-32	-0.772279	3.09205e-22	6.17224e-19	-1.4454	1.08814e-54	1.30326e-50	-0.177475	0.00470843	0.00919803	0.310047	4.86237e-07	1.63751e-06	0.185065	0.00242552	0.00637456	-0.0172934	0.0774889	0.146755	-0.0165877	0.0687926	0.135018	-0.110644	0.523818	0.657186	0.144866	0.067952	0.11809	0.336902	0.589676	0.728155	0.0484233	0.0649382	0.306741
ENSMUSG00000001436	Slc19a1	0	0.0147155	8.34725e-08	2.94787e-07	0.00106679	0.622024	0.705208	-0.00816167	0.00266352	0.00905114	0.0391522	0.236854	0.935854	0.0815005	0.0405434	0.578081	0.320365	0.00011774	0.00643916	1.16255	3.34654e-48	8.33434e-47	1.02372	3.23985e-38	5.47392e-37	0.991065	2.03737e-35	5.52164e-34	0.330198	6.87521e-13	8.79895e-12	0.493543	1.96412e-10	2.15657e-09	0.0821866	1.78091e-18	3.90724e-17	0.327718	6.30303e-11	5.11545e-10	1.03307	0.929432	0.960792	0.782111	0.00845703	0.0844927
ENSMUSG00000001440	Kpnb1	0	0.00187959	0.0341212	0.0474174	-0.0242766	8.34725e-08	1.29021e-06	0.00615185	0.00295952	0.00990004	0.0434515	0.211088	0.914124	0.00943911	0.636817	0.982569	0.0206478	0.643016	0.978701	0.229603	0.00199287	0.00418157	0.0535075	0.473748	0.547097	0.131728	0.0724008	0.125792	-0.125381	0.000562864	0.00202845	-0.0812052	0.00229723	0.00753931	-0.0415043	0.0173725	0.0427936	-1.27069	4.7e-34	1.73769e-32	-0.506405	6.47711e-08	1.02631e-06	-0.109722	0.00606525	0.0677048
ENSMUSG00000001441	Npepps	0	-0.00733641	8.34725e-08	2.94787e-07	0.00694966	4.10684e-05	0.000217585	0.00906061	5.59265e-06	4.94059e-05	-0.0250228	0.401953	0.975922	-0.0571302	0.0782218	0.695591	-0.0826445	0.125275	0.690698	-0.606921	5.96052e-10	2.81107e-09	-0.452859	2.87168e-06	8.86594e-06	-0.757348	1.69479e-14	1.64788e-13	-0.157799	0.00073525	0.00257531	-0.133699	0.000296673	0.00121832	0.118549	8.10177e-07	5.29177e-06	0.0803637	5.74409e-05	0.00020889	-0.264027	0.123247	0.248487	-0.624689	0.13176	0.446745
ENSMUSG00000001445	Mrpl10	0	-0.000881739	0.132675	0.165502	-0.00178268	0.112233	0.175422	-0.00180193	0.170165	0.275163	-0.0149222	0.598363	0.982766	-0.00216476	0.929043	0.997038	0.0197165	0.668829	0.985431	-0.148197	0.0691944	0.104353	-0.0727765	0.34526	0.417595	0.0684655	0.371392	0.48154	-0.0469621	0.364102	0.493335	-0.058685	0.452254	0.587715	-0.00101741	0.217712	0.341894	-0.0193203	0.616138	0.707372	-0.0493696	0.82505	0.897256	0.0750224	0.946034	0.988652
ENSMUSG00000001467	Cyp51	0	-0.0159365	8.34725e-08	2.94787e-07	0.000562927	0.820707	0.867948	0.0213568	8.34725e-08	1.605e-06	-0.0183667	0.635102	0.984555	-0.0791387	0.0440691	0.595057	-0.0237364	0.622886	0.974506	-1.12203	1.86071e-32	2.87978e-31	-1.02982	6.67625e-28	8.09461e-27	-1.3982	6.93153e-49	2.90324e-47	-0.613596	6.50574e-05	0.000288211	-0.706831	0.0009661	0.00351299	-0.181054	4.38782e-11	4.91691e-10	-0.385494	5.41237e-07	2.70145e-06	-0.91256	0.320174	0.484202	-1.38511	0.86479	0.96321
ENSMUSG00000001472	Tcf25	0	0.00485206	8.34725e-08	2.94787e-07	-0.0006935	0.569764	0.659185	0.00399524	0.00797646	0.0227934	-0.0699637	0.0758528	0.734738	-0.0355548	0.228674	0.886686	-0.0750633	0.145017	0.716823	0.310418	5.44629e-06	1.68234e-05	0.290573	2.12065e-05	5.89402e-05	0.0587249	0.385958	0.496552	0.109446	0.0339483	0.0739395	-0.024424	0.00039285	0.00157022	0.0644238	0.0272163	0.0626728	0.148704	0.13824	0.214783	0.14356	0.108302	0.226176	0.0442751	0.762011	0.927795
ENSMUSG00000001473	Tubb6	0	0.00292667	0.0210174	0.0303445	-0.00109617	0.63995	0.719538	0.00565361	0.0452039	0.0953173	0.022121	0.434465	0.975922	-0.00302231	0.766639	0.993002	0.00852479	0.845839	0.992803	0.586298	1.4655e-41	2.95046e-40	0.141951	0.00121581	0.00256142	-0.145687	0.000892953	0.0025755	0.00588112	2.97945e-21	7.75888e-20	-0.0916984	1.92854e-28	9.87264e-27	-0.0112354	2.3365e-18	5.07047e-17	0.0900196	0.399102	0.508654	-0.163665	5.8633e-07	7.4879e-06	-0.178701	0.542069	0.836999
ENSMUSG00000001482	Def8	0	-0.0144567	8.34725e-08	2.94787e-07	0.00799932	0.00102888	0.00329369	0.00506238	0.0575895	0.115304	0.0287086	0.209504	0.914124	0.0166963	0.350853	0.929776	0.0703409	0.124186	0.689127	-1.04004	3.86137e-10	1.84284e-09	-0.921314	1.84837e-08	7.19351e-08	-0.973982	1.50599e-09	9.62657e-09	-0.161126	3.9179e-05	0.000181698	-0.168947	3.94489e-05	0.000195515	-0.00044571	1.17474e-05	6.29628e-05	-0.114801	0.000162826	0.000546049	-0.381886	0.00469994	0.0193539	-0.822037	0.0961806	0.377271
ENSMUSG00000001506	Col1a1	0	0.00329709	0.0706135	0.0929742	0.00172038	0.615514	0.699615	0.00529158	0.191406	0.302486	-0.499704	5.35487e-08	1.23337e-05	-0.00507664	0.81835	0.997038	-0.662549	3.45081e-10	6.66619e-08	-0.312166	0.000973194	0.00216047	0.0659996	0.478291	0.551651	-0.0010493	0.989841	0.992991	0.100632	0.0015843	0.00510857	0.0186428	0.00878537	0.0239541	0.0508563	0.012625	0.0326149	0.265503	0.125261	0.197798	-0.0273361	0.429339	0.593338	-0.116949	0.175845	0.514735
ENSMUSG00000001507	Itga3	0	-0.0133873	8.34725e-08	2.94787e-07	-0.000941158	0.776716	0.832598	0.00536412	0.172677	0.278398	-0.142727	0.00874768	0.243469	-0.0646999	0.0672194	0.670034	-0.119981	0.0397551	0.408685	-1.79655	2.3331e-94	1.40443e-92	-0.753953	4.31361e-22	4.13051e-21	-0.481133	1.42936e-10	1.00365e-09	-0.0368206	8.40645e-53	9.15462e-51	-0.0796107	4.52911e-51	5.65148e-49	0.00377067	1.53847e-46	1.26229e-44	-0.404566	0.00117467	0.00330701	-0.438996	0.00227634	0.0105405	-0.487657	0.930167	0.985492
ENSMUSG00000001508	Sgca	0	-0.00130949	0.366542	0.415945	0.0110733	0.000373038	0.00140435	0.0028779	0.376601	0.507915	0.00225324	0.801636	0.991791	0.575232	0.00488863	0.20031	0.0390554	0.0656559	0.520052	0.357584	0.191885	0.256053	0.592682	0.0390327	0.0615308	-0.203515	0.420563	0.531539	0.459572	0.739261	0.818902	-0.108855	0.0979637	0.179903	0.184187	0.535551	0.666601	0.967253	0.272398	0.376058	0.153448	0.0626656	0.150677	-0.132585	0.141996	0.462785
ENSMUSG00000001510	Dlx3	0	-0.00308968	0.0358021	0.0495864	-0.0099528	0.000950751	0.00307895	0.0210565	2.50417e-07	3.3819e-06	-0.513082	0.000403628	0.0246646	-0.263221	0.00646341	0.238927	-0.757857	2.10881e-05	0.00154952	-1.06749	2.86836e-11	1.50109e-10	-0.119186	0.406092	0.478938	-1.11289	1.64557e-12	1.34739e-11	-0.121727	1.06434e-05	5.45795e-05	-0.334591	0.000380025	0.00152548	0.172782	2.91894e-07	2.03646e-06	-0.580847	0.0253042	0.050352	-0.970632	4.56655e-05	0.000364199	-0.454563	0.000536322	0.0113212
ENSMUSG00000001517	Foxm1	0	-0.0106612	8.34725e-08	2.94787e-07	0.000567444	0.688522	0.760938	0.0102716	7.51252e-07	8.84882e-06	0.0294298	0.316815	0.968679	0.00188608	0.918407	0.997038	-0.0223758	0.620748	0.974506	-0.670751	2.20818e-12	1.2495e-11	-0.584532	6.00726e-10	2.67812e-09	-0.856267	2.23038e-19	2.98189e-18	-0.180131	0.000139291	0.000573589	-0.226233	0.00055961	0.00215757	0.0816515	1.12795e-07	8.36121e-07	-0.308613	0.0307286	0.0596689	-0.663374	0.489783	0.645802	-0.689475	0.0683839	0.314824
ENSMUSG00000001518	Itfg2	0	0.0131013	8.34725e-08	2.94787e-07	-0.0247001	8.34725e-08	1.29021e-06	0.00699504	0.0194651	0.0476154	0.0469174	0.0775665	0.741334	0.0310614	0.121316	0.795382	-0.00718785	0.846238	0.992803	1.25129	9.29426e-25	1.02614e-23	1.02763	4.98882e-17	3.70496e-16	0.798244	4.72164e-11	3.45513e-10	-0.102725	5.30323e-15	8.19709e-14	0.0203287	4.92388e-13	7.27289e-12	0.205536	4.22286e-08	3.31927e-07	-1.42169	2.90384e-37	1.17517e-35	-0.324746	1.49056e-14	6.17834e-13	0.115769	1.68928e-05	0.000695392
ENSMUSG00000001520	Nrip2	1	0.00280523	0.00296386	0.00490726	-0.00740559	0.000145826	0.000638004	-0.00697289	0.00119174	0.00456388	-0.00640424	0.167651	0.886586	0.00178202	0.658128	0.984156	-0.00320647	0.736177	0.990149	0.157393	0.610351	0.677672	0.0781519	0.805974	0.846983	1.51355	0.000614267	0.00183042	0.315389	0.480673	0.604175	0.104542	0.794854	0.865125	-0.0499062	0.400836	0.543208	-0.321618	0.197543	0.288512	0.00587903	0.578172	0.719128	1.50208	0.7083	0.910326
ENSMUSG00000001521	Tulp3	0	0.00298612	0.000464858	0.000868997	0.00661121	0.000114441	0.000520458	-0.0102566	1.08514e-06	1.15546e-05	0.00887337	0.649857	0.985617	-0.00173867	0.911263	0.997038	0.0618382	0.140118	0.712611	0.283087	0.0215987	0.0369456	0.153751	0.216808	0.278963	0.55013	3.82975e-06	1.64905e-05	0.0988961	0.252705	0.374781	0.358452	0.598984	0.715106	-0.0676716	0.0558479	0.11434	0.451629	0.0795313	0.134906	0.537071	0.0126723	0.0429546	0.380215	0.0823442	0.349897
ENSMUSG00000001524	Gtf2h4	0	0.000588498	0.484626	0.535547	-0.00250983	0.123696	0.1908	-0.00425177	0.0295624	0.0671843	0.00550263	0.834762	0.993609	0.0240049	0.329104	0.927416	0.0680503	0.186936	0.775974	0.164274	0.0808688	0.119507	-0.00105511	0.990534	0.992073	0.212102	0.0247622	0.049996	0.259181	0.450977	0.576118	0.0639229	0.418828	0.556533	0.0355244	0.384343	0.527484	-0.114857	0.385418	0.495165	0.137462	0.245632	0.40413	0.204047	0.91733	0.981309
ENSMUSG00000001525	Tubb5	0	-0.00603397	8.34725e-08	2.94787e-07	-0.0102716	8.34725e-08	1.29021e-06	0.00483721	0.00111619	0.00433557	-0.057351	0.0545113	0.65304	-0.0380633	0.165842	0.834602	-0.0452905	0.204719	0.800834	-0.293771	1.72374e-18	1.41818e-17	-0.560825	2.4674e-62	7.55933e-61	-0.518684	4.13638e-54	1.98199e-52	-0.0659189	1.25315e-06	7.46467e-06	-0.149279	0.00204314	0.00682508	-0.0651959	1.28802e-05	6.86045e-05	-0.610503	0.295223	0.401051	-0.500808	0.199752	0.349319	-0.244225	2.11522e-09	2.3904e-07
ENSMUSG00000001542	Ell2	0	-0.00277546	0.0245742	0.0350654	-0.00146874	0.520826	0.615587	0.00905848	0.00172563	0.00624699	0.00907527	0.366776	0.975922	0.00129887	0.881961	0.997038	0.00554745	0.771565	0.991503	-0.439698	0.112334	0.160081	0.0551855	0.832736	0.867572	-0.391943	0.108319	0.176922	-0.416425	0.920324	0.949493	-0.11351	0.208788	0.329349	0.1108	0.0893649	0.169035	-0.699066	0.0337028	0.0646478	-0.00989039	0.698529	0.80894	-0.428848	0.420381	0.758946
ENSMUSG00000001552	Jup	0	-0.0243569	8.34725e-08	2.94787e-07	0.000666795	0.82499	0.870863	0.0355125	8.34725e-08	1.605e-06	-0.337592	1.01768e-05	0.00105075	-0.231952	0.000741025	0.0513021	-0.766525	4.84481e-16	1.87181e-13	-2.63205	2.42367e-104	1.58651e-102	-1.49238	2.20917e-43	4.30304e-42	-2.63543	5.57389e-110	7.33733e-108	-0.630535	5.97729e-36	3.4424e-34	-0.772085	1.07434e-31	6.37107e-30	-0.362987	1.52897e-37	8.93443e-36	-0.869339	1.25437e-05	5.06271e-05	-1.47854	0.951092	0.97294	-1.79219	5.12464e-08	4.32311e-06
ENSMUSG00000001555	Fkbp10	0	-0.00406126	8.34725e-08	2.94787e-07	0.00212186	0.017479	0.0365924	0.00184023	0.0738908	0.140856	0.0359376	0.296302	0.968679	0.0340603	0.261523	0.899816	0.0884743	0.0582924	0.489053	-0.343713	8.35517e-14	5.21556e-13	-0.0922934	0.0403612	0.0634414	-0.163306	0.000255678	0.00082024	-0.0114057	1.40732e-07	9.72218e-07	-0.0565418	4.69677e-06	2.7784e-05	-0.115206	0.000896564	0.00325354	0.0213929	0.0707275	0.122222	-0.17444	0.226261	0.382112	-0.101872	0.265086	0.624423
ENSMUSG00000001569	Nom1	0	-0.000327381	0.728234	0.763279	-0.000685154	0.704764	0.774164	-0.00603788	0.00697496	0.0203144	0.0882524	0.0401273	0.566354	0.0697895	0.0490835	0.615091	0.16132	0.0235912	0.307791	0.336758	0.000431877	0.00102343	-0.00178939	0.984686	0.98782	0.170731	0.0624045	0.110747	-0.171172	8.79885e-05	0.000378325	0.0328555	0.0157154	0.0395825	-0.133527	0.00136085	0.00471143	0.115992	0.347392	0.457629	-0.217256	0.0808897	0.182903	0.172962	0.98333	0.99595
ENSMUSG00000001576	Ergic1	0	0.00269933	0.000927629	0.00165481	-0.00422268	0.00537245	0.013444	-0.00325185	0.0581777	0.116152	0.00107405	0.971643	0.996508	0.00999595	0.707769	0.989445	-0.0187083	0.676351	0.987136	0.0723627	0.200008	0.265561	0.263171	2.47014e-06	7.68566e-06	0.394116	6.59262e-13	5.60092e-12	0.139975	0.341262	0.470099	0.195348	0.110543	0.198809	0.095788	0.786541	0.862028	-0.087003	9.19464e-06	3.78757e-05	-0.0222358	0.000206835	0.00136964	0.237175	0.0200087	0.150461
ENSMUSG00000001604	Tcea3	0	-0.00917252	8.34725e-08	2.94787e-07	0.00338139	0.0931946	0.150618	0.00359325	0.127992	0.219438	0.00369549	0.70246	0.986299	0.00356948	0.646644	0.982569	-0.00461335	0.801781	0.992803	-1.97098	7.95846e-06	2.41414e-05	-1.46235	0.000186517	0.000450551	-1.47429	9.9341e-05	0.000340781	-0.129869	0.000295273	0.0011355	0.0235671	0.000102188	0.000463852	-0.08457	0.000528282	0.00201218	-0.631662	0.0349848	0.0667542	-1.1831	0.141077	0.273901	-1.43165	0.28435	0.646318
ENSMUSG00000001627	Ifrd1	0	0.0382035	8.34725e-08	2.94787e-07	-0.00107028	0.864445	0.901314	0.0245565	0.00192329	0.00685135	0.0101859	0.266714	0.955352	0.00784394	0.273359	0.904956	0.0056079	0.823504	0.992803	2.8633	1.22529e-13	7.55418e-13	3.20006	1.86175e-16	1.33705e-15	1.34532	0.000121016	0.000410201	0.658344	1.27377e-05	6.46273e-05	0.835309	4.27085e-05	0.000209707	1.33165	0.00205004	0.00672989	-0.33869	5.73503e-11	4.66711e-10	1.2871	8.19593e-05	0.000607919	1.26078	0.0592627	0.291304
ENSMUSG00000001630	Stk38l	0	0.0142699	8.34725e-08	2.94787e-07	0.001475	0.327417	0.427294	0.0108668	7.51252e-07	8.84882e-06	0.00106292	0.961148	0.995178	-0.0159476	0.394244	0.94211	-0.0315358	0.426474	0.929122	0.836747	2.26694e-13	1.37497e-12	1.30336	5.32722e-31	7.11424e-30	0.402428	0.000351053	0.00109541	-0.0211933	9.81626e-08	6.917e-07	0.269693	0.000257307	0.0010721	0.296661	0.00180161	0.0060032	0.116836	2.18274e-13	2.29159e-12	0.843261	0.00169794	0.00823798	0.242715	0.0704548	0.319931
ENSMUSG00000001632	Brpf1	0	-0.00200143	0.0863484	0.111945	-0.00266249	0.228152	0.316911	-0.000233565	0.927328	0.954991	0.0145817	0.445704	0.975922	0.00120714	0.948148	0.997038	0.0444556	0.241212	0.830082	-0.0762519	0.658538	0.720488	-0.0248756	0.885223	0.9103	0.0693662	0.692808	0.773308	0.0155951	0.658505	0.754566	0.0100715	0.666956	0.770812	-0.0972992	0.927079	0.955968	-0.140771	0.605583	0.698452	-0.1332	0.531896	0.681452	0.0426471	0.699941	0.906872
ENSMUSG00000001642	Akr1b3	0	0.00557148	1.0601e-05	2.57481e-05	0.00573268	0.00726427	0.0174247	-0.00295715	0.216313	0.333189	0.0155204	0.613368	0.984185	-0.0235525	0.402079	0.943903	0.038446	0.374244	0.908862	0.34596	7.78787e-11	3.95803e-10	0.289034	1.78547e-07	6.30732e-07	0.225881	1.87878e-05	7.25763e-05	-0.124247	3.45463e-10	3.2922e-09	-0.0826745	1.13772e-08	1.00704e-07	-0.0363163	1.8406e-05	9.52009e-05	0.309285	0.785361	0.84277	0.687075	2.5993e-08	4.48661e-07	0.184377	0.501147	0.815546
ENSMUSG00000001655	Hoxc13	0	-0.00697148	2.09516e-05	4.84048e-05	0.00617067	0.0250505	0.0498637	-0.0077343	0.0175625	0.0436567	0.0109083	0.300557	0.968679	0.00139494	0.840699	0.997038	0.00788153	0.708482	0.987532	-0.665512	0.0137289	0.0245284	-0.783345	0.00501654	0.00951153	0.141705	0.504221	0.611714	-0.331933	0.213395	0.3295	-0.031967	0.0334751	0.0745211	-0.143232	0.0939315	0.175868	0.345861	0.00166474	0.00452505	-0.654221	0.471426	0.631044	0.032514	0.0799592	0.344296
ENSMUSG00000001665	Gstt3	0	-0.0087247	8.34725e-08	2.94787e-07	-7.72313e-06	0.997239	0.997738	0.0019733	0.452297	0.583214	0.0139073	0.111102	0.816109	0.0165047	0.0145048	0.367023	0.0189213	0.244429	0.833512	-1.7444	0.00103835	0.00229576	-1.93405	0.000569931	0.00127136	-1.29097	0.00343362	0.00876253	-0.902037	0.0331635	0.0724409	-1.07084	0.044517	0.0942338	-1.28294	0.13296	0.232413	-1.12533	0.0559359	0.100218	-1.8537	0.534933	0.684219	-1.26017	0.330575	0.682923
ENSMUSG00000001666	Ddt	0	-0.00784313	8.34725e-08	2.94787e-07	0.0138467	8.34725e-08	1.29021e-06	-0.00525434	0.0091025	0.0253638	0.023104	0.240003	0.938019	0.0172976	0.271998	0.904956	0.0143121	0.677864	0.987136	-0.565039	0.00142193	0.0030674	-0.549409	0.00192573	0.00392653	-0.322637	0.0470738	0.0870939	-0.150466	0.053261	0.107447	-0.0741723	0.0222748	0.052953	-0.0312415	0.0246562	0.0575549	0.47944	1.22572e-05	4.9554e-05	-0.167279	0.0468111	0.119921	-0.269866	0.465556	0.79251
ENSMUSG00000001674	Ddx18	0	0.00782053	8.34725e-08	2.94787e-07	-0.00793108	0.000377963	0.00141843	-0.0113167	3.08013e-05	0.000209285	-0.00289433	0.92059	0.994446	-0.00303642	0.901538	0.997038	0.00547608	0.903814	0.992809	0.301599	1.84874e-05	5.34285e-05	0.495632	5.13282e-12	2.72424e-11	0.863433	1.93205e-35	5.26002e-34	0.139993	0.101858	0.183592	0.316103	0.956934	0.97434	0.110047	0.0679327	0.134819	-0.15566	1.39831e-10	1.08698e-09	0.448389	0.614644	0.746661	0.705706	0.0444987	0.247815
ENSMUSG00000001687	Ubl3	0	0.00213959	0.0276277	0.0390827	-0.00433572	0.0201366	0.0414603	-0.00917087	0.000117362	0.000642542	-0.0114634	0.550294	0.981299	0.000783571	0.961271	0.998192	-0.0556986	0.156648	0.734604	0.0178807	0.893868	0.919427	0.0316976	0.812641	0.851897	0.489154	0.000102986	0.000352075	0.149224	0.443048	0.56884	0.228181	0.2069	0.326989	0.333434	0.100532	0.186189	-0.0497915	0.689628	0.768399	-0.0212909	0.725687	0.828397	0.469226	0.796004	0.941073
ENSMUSG00000001700	Gramd3	0	-0.00735873	5.86811e-05	0.000126999	0.000970539	0.748839	0.811141	-0.0063628	0.079484	0.149384	0.00920672	0.429407	0.975922	0.0145231	0.131365	0.808092	0.00759861	0.736681	0.990149	-0.232765	0.310771	0.38726	-0.660648	0.00802816	0.0146154	-0.0915291	0.655203	0.743739	-0.070873	0.510491	0.631798	-0.278614	0.842357	0.898619	-0.0717538	0.548826	0.677214	0.0423311	0.023433	0.047098	-0.736548	0.671084	0.788516	-0.0888466	0.960108	0.990748
ENSMUSG00000001707	Eef1e1	0	0.0154406	8.34725e-08	2.94787e-07	-0.00664038	0.000305008	0.00118396	-0.0092971	3.0384e-05	0.000206683	-0.0403458	0.215366	0.914854	-0.0259398	0.291171	0.915844	0.0267695	0.543623	0.960988	0.881709	1.70621e-34	2.79983e-33	0.901091	5.31691e-36	8.41363e-35	1.14371	2.18878e-58	1.13504e-56	0.239099	2.72964e-10	2.64336e-09	0.291977	4.47097e-09	4.16792e-08	0.00776251	1.30199e-14	2.08789e-13	0.11079	1.68932e-14	1.97814e-13	0.859337	0.659524	0.780608	0.721674	6.81908e-06	0.000316612
ENSMUSG00000001729	Akt1	0	-0.00428046	8.34725e-08	2.94787e-07	0.00560278	6.26043e-06	4.61784e-05	0.00243445	0.0407564	0.0876677	0.0148846	0.589071	0.982596	0.00641381	0.776603	0.993002	0.00426313	0.939195	0.99369	-0.243685	0.00726276	0.0136519	-0.209835	0.0204554	0.0342659	-0.3301	0.000212535	0.000692212	0.0366217	0.0210771	0.0491307	0.0144393	0.0311996	0.0703313	0.00137624	0.06751	0.134141	0.107201	0.0100664	0.0224177	-0.12071	0.435653	0.599023	-0.256165	0.354725	0.706771
ENSMUSG00000001739	Cldn15	0	-0.00344795	0.00011202	0.000231161	-0.00199227	0.187833	0.269261	0.00675137	0.000492237	0.00216545	-0.00833316	0.212779	0.914124	-0.00420102	0.433557	0.950666	0.003357	0.803919	0.992803	-1.01676	0.016484	0.0289237	-0.699495	0.0649909	0.09694	-1.59218	0.00129445	0.0036103	-0.588215	0.122323	0.213011	-0.879182	0.498484	0.630155	-0.494004	0.102611	0.189248	-0.501428	0.514458	0.617999	-0.654753	0.728487	0.830072	-1.56788	0.3605	0.712183
ENSMUSG00000001750	Tcirg1	0	-0.0152446	8.34725e-08	2.94787e-07	0.00697468	0.00213815	0.00613188	0.00679969	0.00875225	0.0245592	-0.000737495	0.852392	0.993609	-0.0109817	0.653801	0.982739	-0.0028076	0.94922	0.99369	-1.58211	6.1583e-57	1.89154e-55	-0.866552	3.76575e-22	3.62038e-21	-0.910261	4.8051e-24	8.25829e-23	-0.0280021	9.52563e-33	4.75448e-31	-0.241868	5.71626e-25	2.34504e-23	-0.340783	3.48587e-18	7.49681e-17	-0.14461	5.34518e-09	3.44789e-08	-0.33039	8.38049e-06	8.18841e-05	-0.70022	0.0264763	0.178818
ENSMUSG00000001751	Naglu	0	-0.00182833	0.316634	0.364919	-0.00255143	0.464648	0.563191	-0.000499947	0.902031	0.938541	0.0240666	0.169057	0.886586	0.019133	0.14755	0.821577	0.000163549	0.995804	0.999309	-0.365814	0.0305287	0.0503723	0.204783	0.220103	0.282595	0.196997	0.210168	0.305164	-0.0323926	0.113738	0.201216	0.13703	0.0172234	0.0427693	-0.0343072	0.153367	0.259673	-0.495573	0.00238006	0.00623867	-0.119163	0.0818166	0.18433	0.131778	0.380239	0.727317
ENSMUSG00000001755	Coasy	1	-0.00925505	8.34725e-08	2.94787e-07	-0.00367655	0.0474353	0.0849877	-0.0320556	8.34725e-08	1.605e-06	0.00954135	0.692281	0.986078	0.0101538	0.613637	0.978957	0.0244456	0.566358	0.96604	-0.560549	4.21661e-06	1.32227e-05	-1.41256	2.30844e-26	2.63611e-25	0.492341	1.42211e-05	5.60194e-05	-0.137924	0.00820763	0.0216181	0.176686	5.50256e-06	3.20911e-05	-0.00470893	0.00172606	0.00577715	0.0484621	1.23586e-16	1.76873e-15	-0.084952	3.41795e-14	1.36025e-12	0.522862	0.696764	0.906456
ENSMUSG00000001761	Smo	0	-0.00336988	0.000404257	0.000763214	0.00218445	0.187444	0.268897	0.00130574	0.498073	0.624233	-0.0390232	0.156801	0.877071	0.0104734	0.611137	0.978619	-0.0176411	0.673301	0.987136	-0.395509	0.000907509	0.0020278	-0.181842	0.119784	0.166345	-0.197058	0.080402	0.137512	0.0588138	0.00423771	0.0121328	-0.146989	0.101761	0.185823	-0.156152	0.162363	0.271451	0.210852	0.0138689	0.0296353	-0.360769	0.207156	0.358861	-0.0909373	0.226463	0.583592
ENSMUSG00000001767	Crnkl1	0	-0.00203237	0.050497	0.0681658	0.00390773	0.0491524	0.0875404	-0.00637326	0.00791444	0.0226432	-0.0402465	0.171274	0.888416	-0.00416709	0.847216	0.997038	0.00615643	0.888138	0.992809	-0.090396	0.356991	0.435467	-0.376724	0.000186626	0.000450723	-0.142527	0.136744	0.215959	-0.175176	0.48469	0.607778	-0.0447002	0.746623	0.830668	-0.234363	0.354671	0.496507	0.412021	1.24767e-08	7.71597e-08	-0.107847	0.0346946	0.095061	0.131253	0.0104853	0.0988221
ENSMUSG00000001768	Rin2	0	-0.0349956	8.34725e-08	2.94787e-07	-0.00895904	0.0034222	0.00921848	0.00586978	0.0858983	0.158966	-0.0186458	0.498029	0.97774	-0.0665331	0.0473771	0.607533	-0.0815718	0.12811	0.696175	-3.18187	1.48073e-74	6.69347e-73	-3.18827	3.85747e-75	1.50517e-73	-2.215	7.32469e-55	3.52379e-53	-0.716618	2.46289e-31	1.11754e-29	-0.50106	5.25641e-37	3.98523e-35	-0.378054	4.20696e-35	2.24979e-33	-1.03956	5.51535e-24	1.2513e-22	-2.70316	0.0115858	0.0400422	-1.19733	1.77243e-08	1.64589e-06
ENSMUSG00000001774	Chordc1	0	0.00210362	0.00964249	0.0147124	-0.00411524	0.00835459	0.0195659	-0.00817522	4.52421e-05	0.000288121	-0.0281719	0.348812	0.975922	-0.0275018	0.299263	0.916523	-0.0831402	0.122038	0.682693	0.245618	0.00157763	0.0033699	-0.180992	0.0224132	0.0372124	0.224274	0.00344299	0.00878139	-0.107698	0.00102975	0.00346986	0.0353095	0.0473077	0.0992119	-0.0689553	0.0132691	0.0339565	0.0998068	0.010478	0.0231707	-0.0647564	0.261148	0.421887	0.211888	0.744291	0.920585
ENSMUSG00000001783	Rtcb	0	0.0109662	8.34725e-08	2.94787e-07	-0.00373764	0.00400042	0.0105021	0.00130577	0.361282	0.492748	-0.0500126	0.155747	0.875766	-0.0681378	0.0632523	0.663955	-0.045214	0.332268	0.895493	0.805552	1.93582e-42	4.01893e-41	0.630674	1.85026e-26	2.11895e-25	0.401783	9.68061e-12	7.51063e-11	0.0669445	1.35265e-18	2.88316e-17	0.178002	4.27721e-14	7.1261e-13	0.0385941	2.10347e-16	3.9681e-15	0.130037	2.53243e-09	1.69664e-08	0.359662	0.000862497	0.0046498	0.268747	0.0570747	0.285231
ENSMUSG00000001785	Pwp1	0	0.0122516	8.34725e-08	2.94787e-07	-0.00218496	0.131448	0.200358	-0.0026066	0.126131	0.21694	0.00071642	0.888506	0.994332	-0.00738423	0.775115	0.993002	0.0360127	0.442756	0.93416	0.686335	1.86309e-24	2.04004e-23	0.907571	4.94977e-42	9.23571e-41	0.709451	1.6422e-26	3.10773e-25	-0.0430535	2.16096e-14	3.17407e-13	0.251224	3.00829e-06	1.83578e-05	0.00186336	7.80305e-11	8.44379e-10	0.180274	1.81865e-14	2.111e-13	0.588352	0.000437857	0.0026147	0.551594	0.0393659	0.227589
ENSMUSG00000001786	Fbxo7	0	-0.000706422	0.446332	0.497267	0.00604532	0.00170543	0.00505801	0.010608	1.57763e-05	0.000119914	0.000128089	0.994591	0.998613	0.00102207	0.947649	0.997038	-0.0220116	0.546635	0.961188	-0.303429	0.0441261	0.0700393	0.25414	0.0884388	0.127409	-0.396682	0.007141	0.0168026	-0.110466	0.282899	0.408097	-0.141912	0.396916	0.535314	-0.0939144	0.3106	0.448436	0.138681	0.552402	0.650853	0.124812	0.418104	0.584487	-0.378247	0.818575	0.948656
ENSMUSG00000001794	Capns1	0	0.00174613	0.0281054	0.0397069	0.00447815	0.00436644	0.0112898	0.00290687	0.0984799	0.177557	-0.0266603	0.338752	0.975922	-0.0117808	0.598081	0.978136	-0.0233033	0.525431	0.959534	0.0905295	0.332967	0.410732	0.12054	0.197101	0.256276	-0.0335484	0.707938	0.786386	-0.00400304	0.456404	0.581396	-0.147941	0.0578335	0.116828	0.0271213	0.650424	0.760183	0.334151	0.0962888	0.158331	0.0265442	0.428491	0.592919	-0.0541651	0.790933	0.938815
ENSMUSG00000001829	Clpb	0	0.00589342	8.34725e-08	2.94787e-07	-0.00188569	0.137261	0.207791	-0.00215882	0.147492	0.245253	0.0170167	0.564074	0.982393	-0.00723865	0.763772	0.993002	0.0162132	0.721623	0.990149	0.282229	4.37688e-05	0.000120752	0.444144	8.85528e-11	4.25501e-10	0.386943	1.02e-08	6.06382e-08	0.0427809	0.0128024	0.0320702	0.162568	0.183797	0.298052	-0.0202213	0.00459453	0.0135929	-0.0703401	1.09579e-07	6.02405e-07	0.444515	0.996953	0.998367	0.292383	0.197102	0.544624
ENSMUSG00000001833	Sept7	0	-0.00068185	0.267645	0.313619	-0.00730451	2.00334e-06	1.87631e-05	-0.00408507	0.00504658	0.0155406	-0.0452078	0.19176	0.908389	-0.0465335	0.148326	0.821656	-0.116517	0.0375789	0.395155	-0.0656025	0.343872	0.422269	-0.236615	0.000692803	0.00152249	0.0447339	0.513233	0.61926	-0.0348165	0.747091	0.824602	-0.12937	0.502274	0.632728	0.00420468	0.512009	0.646092	-0.125408	0.252125	0.352911	-0.272638	0.697675	0.808343	0.111686	0.354268	0.706771
ENSMUSG00000001844	Zdhhc4	0	0.00323836	0.000126544	0.000258902	0.00557261	0.000460518	0.00166612	-0.00652963	0.000398331	0.00179249	0.0206727	0.422364	0.975922	0.00305618	0.868307	0.997038	-0.0168171	0.703269	0.987464	0.161794	0.118101	0.167385	0.246196	0.0170396	0.0290023	0.363763	0.00027422	0.000874103	-0.0263896	0.174154	0.282417	0.105536	0.677315	0.778951	0.169081	0.961435	0.978295	0.316444	0.614495	0.70601	0.415179	0.186333	0.331809	0.303534	0.434034	0.770037
ENSMUSG00000001847	Rac1	0	0.00835393	0.0903775	0.116588	0.0252719	0.00952821	0.0218879	0.00784579	0.471155	0.600614	0.00664126	0.446117	0.975922	0.00805323	0.252149	0.894803	0.00398049	0.802297	0.992803	1.04396	0.0168555	0.0294977	0.923686	0.0296244	0.0478456	0.10886	0.633227	0.72578	0.905667	0.537499	0.655072	0.91203	0.508463	0.637922	1.02933	0.94988	0.970766	0.715186	0.483721	0.590071	0.757256	0.213459	0.366651	0.109048	0.994289	0.997915
ENSMUSG00000001855	Nup214	0	0.0032836	0.000171786	0.000344118	0.00119153	0.422747	0.523636	0.00361033	0.0435011	0.0924919	0.00423171	0.877292	0.993609	-0.0171434	0.456243	0.953544	0.0141482	0.749733	0.990284	0.335692	3.78769e-05	0.000105298	0.254328	0.00193892	0.00395072	-0.116833	0.152808	0.236436	0.0171228	0.00384942	0.0111436	0.109588	0.0380542	0.0827167	-0.190026	4.47447e-05	0.00021639	0.100979	0.186713	0.275177	0.203542	0.671675	0.788978	-0.0222039	0.235651	0.595565
ENSMUSG00000001864	Aif1l	0	0.00544839	0.00140326	0.00243794	0.000654129	0.827897	0.873009	0.00931679	0.0117821	0.0313432	-0.167113	0.00895893	0.247684	-0.0805034	0.034462	0.537436	-0.569139	1.43206e-07	1.76823e-05	-0.0138971	0.928594	0.946611	0.385275	4.19035e-05	0.00011202	-0.00472029	0.978019	0.985092	0.204422	0.089927	0.165474	0.139928	0.245534	0.373256	-0.148398	0.336963	0.477069	0.156008	0.0853097	0.143087	-0.00227196	0.00193721	0.00921599	-0.234761	0.0224004	0.16194
ENSMUSG00000001870	Ltbp1	0	0.0128938	8.34725e-08	2.94787e-07	-0.00662916	1.00167e-06	1.02996e-05	0.00150306	0.21176	0.327608	0.0137444	0.654493	0.985617	-0.0306049	0.291995	0.915844	0.0560506	0.206351	0.802691	0.862382	8.09953e-58	2.5399e-56	0.901008	4.69343e-63	1.44531e-61	0.666475	2.07118e-35	5.588e-34	-0.0449173	2.09459e-32	1.01583e-30	0.12664	3.30801e-22	1.10074e-20	-0.014868	5.20461e-25	1.7128e-23	-0.0362774	2.32329e-34	8.75179e-33	0.378304	3.60661e-12	1.12217e-10	0.318544	1.2945e-06	7.21245e-05
ENSMUSG00000001891	Ugp2	0	-0.00230964	0.00262654	0.0043827	0.00584364	0.000193656	0.000805209	0.010765	2.50417e-07	3.3819e-06	0.0234888	0.421517	0.975922	0.00295881	0.900378	0.997038	-0.0456911	0.338963	0.899771	-0.321257	0.000862575	0.00193534	0.144223	0.12111	0.168012	-0.446613	2.46108e-06	1.09352e-05	0.0473898	0.00408259	0.011742	-0.115019	0.101733	0.1858	0.111227	0.00247777	0.0079831	-0.069248	0.0964225	0.158464	0.0516447	0.432462	0.595799	-0.380433	0.409206	0.749408
ENSMUSG00000001909	Trmt1	0	0.0133288	8.34725e-08	2.94787e-07	0.0114805	2.75459e-06	2.3911e-05	-0.0069879	0.00328957	0.0108109	0.349352	7.30873e-09	2.08421e-06	0.31786	1.05048e-07	3.70049e-05	0.484189	1.11758e-12	3.11285e-10	1.03373	1.42624e-90	8.13567e-89	1.30494	3.06623e-136	2.72077e-134	0.998333	1.41689e-86	1.35784e-84	0.157212	4.21069e-32	2.00158e-30	0.336566	1.46713e-24	5.80024e-23	-0.00449719	1.39754e-36	7.85966e-35	0.640751	1.05194e-19	1.83157e-18	1.15565	0.00141918	0.00705994	0.566697	1.08457e-09	1.31233e-07
ENSMUSG00000001910	Nacc1	0	-0.00980977	8.34725e-08	2.94787e-07	0.0115012	6.92821e-06	4.97859e-05	0.000247356	0.91743	0.948099	0.346499	0.000879188	0.0448087	0.280137	0.0028516	0.138836	0.179398	0.0217896	0.293559	-0.490749	3.19199e-05	8.95688e-05	-0.195107	0.0846803	0.122569	-0.276085	0.0125116	0.0275508	-0.116403	0.0123857	0.0311109	-0.114577	0.012264	0.0319025	0.10876	0.000327833	0.00130904	0.293716	0.00100323	0.00286751	-0.564131	0.00950247	0.0341415	-0.283581	0.950682	0.988904
ENSMUSG00000001911	Nfix	0	-0.0182569	8.34725e-08	2.94787e-07	0.00192351	0.447931	0.546969	0.0112781	0.000541653	0.00234325	0.390266	8.94353e-06	0.000956399	0.285452	0.000409445	0.0347796	0.341926	0.000225906	0.0110436	-1.103	1.93436e-27	2.41876e-26	-0.753184	1.06066e-14	6.81269e-14	-1.13659	4.19935e-30	9.35019e-29	-0.0720098	6.84722e-15	1.04755e-13	-0.32888	3.62049e-09	3.42034e-08	-0.00769177	3.85776e-14	5.93986e-13	-0.623026	0.311318	0.41822	-0.882188	0.282847	0.445585	-0.739411	0.000605194	0.0123925
ENSMUSG00000001918	Slc1a5	1	0.00952362	8.34725e-08	2.94787e-07	-0.0131568	5.42571e-06	4.12664e-05	-0.0419104	8.34725e-08	1.605e-06	0.0479574	0.0937278	0.770473	0.0698903	0.0212624	0.433235	0.0811171	0.111343	0.656115	1.38892	1.64353e-45	3.69379e-44	-0.0105747	0.919844	0.93825	1.89072	2.7112e-86	2.57758e-84	0.342516	3.35151e-15	5.27565e-14	0.912955	7.58122e-05	0.000354609	0.300453	8.76762e-13	1.18541e-11	0.0793584	0.523137	0.626165	0.261212	0.0364758	0.0988112	1.3551	1.23415e-05	0.000534399
ENSMUSG00000001924	Uba1	0	0.00213794	2.08681e-06	5.79998e-06	-0.00431479	1.58598e-06	1.52109e-05	-0.00579645	1.66945e-07	2.59046e-06	-0.0255014	0.405808	0.975922	-0.0340427	0.227438	0.886686	0.00539198	0.901643	0.992809	0.133705	0.00185668	0.00392054	0.0154291	0.720666	0.773	0.26925	2.46521e-10	1.6894e-09	-0.0300015	0.00659431	0.0178637	0.0621446	0.231924	0.357098	-0.0921072	0.000766592	0.00281947	-0.00627169	0.720464	0.792802	0.0079748	0.900469	0.942977	0.238718	0.563902	0.847343
ENSMUSG00000001942	Siae	0	-0.00768852	8.34725e-08	2.94787e-07	-0.000239293	0.89061	0.919509	0.000315195	0.876609	0.922507	0.00200047	0.82167	0.993609	0.00291053	0.679496	0.986893	0.00928611	0.593667	0.97072	-2.41572	9.33646e-06	2.80797e-05	-1.90843	6.82828e-05	0.000177393	-0.527438	0.0625967	0.110957	-0.158088	0.000230061	0.000906249	-0.52511	0.00104264	0.00375405	-0.474146	0.00145502	0.00498135	-0.967641	0.0312197	0.0604755	-1.23058	0.0233249	0.0697997	-0.526592	0.97624	0.993997
ENSMUSG00000001962	Fam50a	0	0.0120968	8.34725e-08	2.94787e-07	0.00787089	0.000248831	0.00099724	-0.0024676	0.268687	0.393857	-0.0176647	0.508256	0.97774	-0.00159749	0.946278	0.997038	0.0458116	0.338032	0.89927	1.10779	2.63942e-41	5.29609e-40	0.753079	1.79495e-19	1.53037e-18	0.517116	4.3611e-10	2.9169e-09	0.339638	4.60424e-11	4.87228e-10	0.274233	5.56527e-13	8.1699e-12	-0.0295665	3.38069e-18	7.28368e-17	0.710975	0.714399	0.787792	0.809922	0.59462	0.731838	0.354194	0.116197	0.41737
ENSMUSG00000001964	Emd	0	0.00711112	8.34725e-08	2.94787e-07	0.00331306	0.0393119	0.0727511	0.0013779	0.453604	0.584648	0.00807087	0.684732	0.986078	0.00579195	0.733546	0.990929	-0.0352127	0.359397	0.904923	0.683673	1.84246e-08	7.5456e-08	0.591659	1.23585e-06	3.97858e-06	0.283897	0.0170041	0.035988	0.245068	0.00699336	0.0188001	0.235004	0.00512615	0.0150949	0.242748	0.015404	0.038555	0.257855	0.0437782	0.0811167	0.394383	0.175584	0.318589	0.174515	0.209122	0.561325
ENSMUSG00000001983	Taco1	0	-0.00131698	0.282969	0.329672	-0.00707194	0.00448422	0.0115268	-0.0030048	0.275482	0.401558	0.00146302	0.916657	0.994332	0.00612079	0.621623	0.981182	-0.0122166	0.66122	0.985431	-0.129937	0.539765	0.614215	-0.241229	0.26711	0.334417	0.126129	0.509008	0.616335	-0.229147	0.676321	0.768002	-0.15395	0.914935	0.947464	-0.0371965	0.719483	0.813467	-0.368905	0.654416	0.740041	-0.390217	0.420355	0.586266	0.111508	0.806113	0.944301
ENSMUSG00000001995	Sipa1l2	0	0.00907614	9.26544e-06	2.26743e-05	-0.00778737	0.0212598	0.0434073	0.00926818	0.0199436	0.048617	-0.00221705	0.853749	0.993609	-0.00597038	0.555134	0.970535	0.0301674	0.248351	0.834831	0.082272	0.688226	0.748185	1.43194	7.358e-12	3.84897e-11	0.741719	0.000221718	0.000719382	0.166517	0.715433	0.800801	0.0805034	0.978273	0.98709	-0.0410625	0.625135	0.74209	-0.639905	9.34363e-11	7.42224e-10	0.785919	0.00587354	0.0232438	0.657756	0.221663	0.578119
ENSMUSG00000001998	Ap4e1	0	-0.000875592	0.437959	0.488711	-0.0030512	0.161408	0.237941	0.00622699	0.0181619	0.0448674	-0.00186885	0.922385	0.994446	-0.0191318	0.243558	0.892077	0.017746	0.619159	0.974506	-0.128143	0.403317	0.482892	-0.122502	0.4376	0.511316	-0.371279	0.0157006	0.0336154	-0.389884	0.189309	0.30064	-0.155603	0.876899	0.922513	-0.295645	0.446492	0.586397	-0.27344	0.463141	0.571602	-0.0962676	0.872493	0.925493	-0.316383	0.460944	0.790263
ENSMUSG00000001999	Blvra	0	-0.0149384	8.34725e-08	2.94787e-07	0.0107384	1.41903e-06	1.38538e-05	-0.000162578	0.934356	0.958959	0.0200182	0.442857	0.975922	0.0251947	0.270371	0.904956	-0.00286396	0.945482	0.99369	-1.19657	7.62474e-21	7.04215e-20	-0.956221	1.48187e-14	9.40714e-14	-0.789876	4.27258e-11	3.13418e-10	-0.153186	5.96226e-10	5.4396e-09	-0.334306	1.98291e-07	1.47996e-06	-0.0167158	2.25528e-10	2.31897e-09	0.291843	8.04223e-14	8.75799e-13	-0.54781	0.00668582	0.0257771	-0.514882	0.0182178	0.141617
ENSMUSG00000002010	Idh3g	0	-0.000438231	0.394183	0.444123	-0.000565235	0.565625	0.655663	-0.00626376	5.59265e-06	4.94059e-05	-0.101213	0.0253465	0.447005	-0.0365853	0.219453	0.884213	-0.0455425	0.336052	0.898013	-0.145199	0.0209728	0.0359778	-0.212773	0.000760423	0.00165891	0.124766	0.0406385	0.0767352	0.0440118	0.0297909	0.0662505	0.00266299	0.0850211	0.160439	-0.0443176	0.293952	0.429631	0.16239	2.03093e-05	7.90658e-05	0.0369686	0.00338904	0.0147359	0.179091	0.423108	0.760836
ENSMUSG00000002014	Ssr4	0	0.00408074	8.34725e-08	2.94787e-07	0.00201663	0.065534	0.111653	-0.00571263	6.9783e-05	0.000415886	0.0170661	0.578892	0.982596	0.0205132	0.470182	0.955634	0.0588482	0.23514	0.827228	0.440182	7.18934e-13	4.19204e-12	0.253905	3.17256e-05	8.606e-05	0.381144	2.77648e-10	1.89297e-09	0.0686561	1.1028e-05	5.64204e-05	0.0424882	2.02023e-06	1.2737e-05	0.0811077	0.000116243	0.000514018	0.329255	0.342866	0.452683	0.186453	0.384412	0.552209	0.299025	0.178578	0.518181
ENSMUSG00000002015	Bcap31	0	-0.00194833	0.00177763	0.00304203	0.00387135	0.00132629	0.00408529	-0.00236201	0.0743401	0.141532	0.017952	0.570616	0.982596	0.0576564	0.0899584	0.739557	0.0917694	0.070493	0.536531	-0.145265	0.0195885	0.0338309	-0.0150648	0.806675	0.847348	0.056295	0.35157	0.461175	-0.0276959	0.168765	0.275719	-0.0508114	0.262174	0.392181	-0.0904623	0.560465	0.688052	0.263153	0.0011269	0.00318676	-0.0966185	0.323892	0.488038	0.0491312	0.939193	0.987504
ENSMUSG00000002017	Fam98a	0	-0.00437614	0.00253239	0.00424035	0.00576465	0.03039	0.0586502	-0.00737818	0.0193565	0.0473691	-0.00441695	0.861914	0.993609	-0.00856808	0.695697	0.989445	0.0567141	0.240346	0.830082	0.190445	0.0386017	0.0621519	-0.725464	1.35672e-13	8.05756e-13	-0.26982	0.00346942	0.00884072	0.0855865	0.402524	0.531683	-0.0178169	0.089492	0.167421	-0.157047	0.0150603	0.0378449	0.408688	3.37479e-17	4.99094e-16	0.033664	5.8193e-09	1.12798e-07	-0.158409	0.187461	0.531376
ENSMUSG00000002020	Ltbp2	0	-0.00336807	0.00155952	0.00269185	-0.00199349	0.292188	0.388256	0.00244967	0.270093	0.395435	0.0320436	0.325191	0.970549	-0.0245701	0.356797	0.93153	0.0193621	0.667999	0.985431	-0.110297	0.141029	0.195757	-0.225106	0.00284314	0.0056378	-0.21851	0.00251878	0.00659651	-0.281605	0.0964434	0.175417	-0.193374	0.41505	0.552881	-0.0230606	0.442275	0.582776	-0.040647	0.0764828	0.130511	-0.415203	0.0631618	0.151535	-0.204526	0.847483	0.958904
ENSMUSG00000002028	Kmt2a	0	-0.00169192	0.0786983	0.10276	-0.00571723	0.00318139	0.00864953	-0.00177575	0.403018	0.533867	0.00396179	0.864971	0.993609	0.00163037	0.934365	0.997038	-0.0130559	0.751589	0.990284	-0.172802	0.14724	0.203225	-0.1471	0.217348	0.279568	0.0283274	0.802937	0.859782	-0.228272	0.72262	0.805909	-0.0862773	0.568428	0.689818	-0.151837	0.902454	0.940117	-0.203343	0.727777	0.798063	-0.449663	0.0427702	0.111841	0.0301762	0.980453	0.995206
ENSMUSG00000002031	Ift46	0	-0.00740853	8.34725e-08	2.94787e-07	-0.0119183	8.34725e-08	1.29021e-06	0.00307057	0.0825002	0.15396	-0.037679	0.215433	0.914854	-0.042014	0.113924	0.785521	-0.0427043	0.330582	0.895107	-0.683895	2.35801e-10	1.14312e-09	-0.656417	1.07992e-09	4.72303e-09	-0.462783	7.42784e-06	3.05242e-05	-0.0373758	8.52918e-06	4.45773e-05	-0.054883	1.23052e-05	6.69712e-05	-0.183319	0.00159526	0.00539209	-0.727544	0.628642	0.717601	-0.553027	0.403816	0.570871	-0.301822	0.0859723	0.358213
ENSMUSG00000002043	Trappc6a	0	0.00127074	0.234303	0.278223	0.00440236	0.0349687	0.0659517	-0.00657079	0.00876937	0.0245899	0.00176868	0.888421	0.994332	0.00332126	0.763092	0.993002	-0.0281414	0.237361	0.828575	0.226971	0.259897	0.33276	0.0877816	0.668032	0.727157	0.363116	0.0544392	0.0987772	0.233717	0.975573	0.985113	0.119392	0.623168	0.736148	0.406979	0.480963	0.618314	0.528989	0.0909827	0.150974	0.0595298	0.873551	0.926123	0.31692	0.471477	0.795468
ENSMUSG00000002052	Supt6	0	0.00912953	8.34725e-07	2.49231e-06	-0.00276534	0.316602	0.415215	0.0183033	2.50417e-06	2.42895e-05	0.0298209	0.296528	0.968679	-0.00431815	0.843117	0.997038	0.0121113	0.960132	0.994853	0.863179	4.30381e-19	3.67727e-18	0.835078	6.01106e-18	4.72174e-17	-0.198751	0.0402798	0.0761541	-0.263791	2.34437e-16	4.09973e-15	-0.270692	1.3735e-16	3.00241e-15	-0.118987	1.02967e-10	1.09639e-09	-0.0527744	7.61865e-11	6.11687e-10	-0.0374718	2.16681e-11	6.00839e-10	-0.262587	0.428176	0.7648
ENSMUSG00000002055	Spag5	0	0.00275494	0.000244491	0.00047754	-0.00209941	0.106508	0.168104	0.000659976	0.660368	0.763201	-0.0240645	0.40902	0.975922	0.0134897	0.579366	0.975539	-0.00840902	0.849247	0.992803	0.11973	0.158709	0.217104	0.145395	0.0783169	0.114284	0.0867857	0.283398	0.38945	-0.0923531	0.0624052	0.12261	-0.0278924	0.183909	0.298071	-0.1235	0.0533341	0.110096	-0.0308058	0.129865	0.203807	0.0715892	0.489093	0.644964	0.0876373	0.942601	0.988284
ENSMUSG00000002057	Foxn1	0	0.00389924	0.000172037	0.000344505	0.00376256	0.0374106	0.0698149	0.00423433	0.046043	0.0967525	0.00751335	0.20244	0.91405	0.00487007	0.28326	0.912235	0.00223561	0.839288	0.992803	1.34423	0.00130236	0.00282473	1.02396	0.0100649	0.0179575	0.107566	0.639347	0.730517	0.207562	0.0122076	0.0307086	-0.0221359	0.00560278	0.0162868	-0.0825224	0.00981788	0.0263224	0.246172	0.055276	0.0991393	0.918577	0.476012	0.634404	0.0525511	0.0902415	0.365822
ENSMUSG00000002058	Unc119	0	-0.000678631	0.56252	0.61042	0.00314314	0.165255	0.242492	-0.00582477	0.0321738	0.0720796	4.41535e-06	0.79554	0.991791	0.00770619	0.301753	0.918471	-0.00719757	0.67794	0.987136	-0.35421	0.20477	0.271013	-0.0507854	0.848996	0.881408	0.366361	0.12771	0.20376	0.292221	0.0465729	0.0962722	-0.120028	0.343531	0.480042	0.0338419	0.202635	0.323605	0.179632	0.45121	0.559239	-0.0123797	0.819655	0.893498	0.356066	0.828905	0.952615
ENSMUSG00000002059	Rab34	0	-0.00169884	0.00156878	0.00270667	0.00347639	0.000897412	0.00293318	0.00614996	4.17362e-06	3.83993e-05	0.0170338	0.590364	0.982596	0.0299475	0.301976	0.918471	0.0261185	0.570222	0.96604	-0.0350922	0.544814	0.618297	-0.000886681	0.987265	0.990158	-0.27726	1.69839e-06	7.71523e-06	0.0378422	0.362052	0.491147	-0.0805268	0.567283	0.688778	-0.0166989	0.835581	0.895698	0.0273131	0.726421	0.797014	-0.0233354	0.77373	0.863634	-0.257095	0.755531	0.924545
ENSMUSG00000002064	Sdf2	0	-0.0046389	0.000166277	0.000334032	-0.0060069	0.00651068	0.0158907	0.00421591	0.0909794	0.166668	-0.00769216	0.782216	0.989453	-0.0252185	0.317295	0.924442	0.00937484	0.835514	0.992803	0.0208895	0.813763	0.854456	-0.565255	2.02046e-10	9.40291e-10	-0.544463	3.93198e-10	2.64762e-09	-0.0408399	0.592776	0.702429	-0.0925326	0.32056	0.455651	-0.117293	0.279151	0.413191	-0.380337	0.113126	0.181358	-0.384837	0.112031	0.231822	-0.395364	0.0907774	0.367248
ENSMUSG00000002068	Ccne1	0	-0.0336631	8.34725e-08	2.94787e-07	0.0136568	8.34725e-08	1.29021e-06	-0.0101255	2.58765e-06	2.50788e-05	0.0207813	0.487797	0.977059	-0.0157861	0.545795	0.970535	-0.0693666	0.178754	0.7736	-2.73942	6.58237e-125	5.84076e-123	-2.78626	8.58009e-128	6.89805e-126	-1.47128	1.06852e-53	5.09952e-52	-0.348127	2.72542e-61	3.6683e-59	-0.328031	1.76032e-62	3.29482e-60	-0.0275381	8.84583e-67	1.20414e-64	0.19061	3.05017e-94	5.21972e-92	-1.23003	5.48118e-26	5.66027e-24	-0.784407	3.1178e-08	2.70639e-06
ENSMUSG00000002102	Psmc3	0	-0.00315198	0.000454174	0.00084982	0.0043835	0.00751686	0.0179086	0.00927625	1.61102e-05	0.000122064	0.0412414	0.214545	0.914854	0.0378711	0.214351	0.880942	0.0930624	0.0441473	0.43021	0.0151995	0.75264	0.80463	-0.0767517	0.112244	0.157096	-0.496702	2.83468e-24	4.93556e-23	-0.146997	0.0157657	0.0382458	-0.193215	0.00218486	0.00721998	-0.0764166	0.283038	0.417654	0.109504	0.00568627	0.0135743	-0.253358	0.00789196	0.0294694	-0.396284	0.0922133	0.36981
ENSMUSG00000002103	Acp2	0	0.00190945	0.0320075	0.044765	0.00819703	3.39733e-05	0.000185153	-0.00621812	0.00275893	0.00929973	0.0185539	0.41563	0.975922	0.00213217	0.913006	0.997038	0.0288746	0.483955	0.950976	0.152448	0.183774	0.246658	0.1823	0.109785	0.15403	0.27211	0.0141599	0.0307007	-0.0821802	0.122371	0.213033	0.11148	0.770413	0.84878	0.0564636	0.593936	0.715771	0.473346	0.0628448	0.110507	0.39133	0.135746	0.266268	0.219197	0.509659	0.820571
ENSMUSG00000002104	Rapsn	0	0.00199245	0.0904046	0.116597	0.00771458	0.00139566	0.00426271	0.0098011	0.000588898	0.00251047	-0.32233	0.000258563	0.0170154	-0.0572555	0.0661108	0.670034	-0.263857	0.00300447	0.0789134	-0.38191	3.76733e-06	1.19073e-05	0.229004	0.00350925	0.00684322	-0.242305	0.00223199	0.0059192	0.172077	1.25587e-06	7.46975e-06	0.179721	4.85772e-07	3.41294e-06	0.0923836	0.000157902	0.000676989	0.342477	0.305351	0.411501	0.365726	0.184883	0.330012	-0.232652	0.897468	0.97442
ENSMUSG00000002105	Slc39a13	0	-0.018541	8.34725e-08	2.94787e-07	-0.00630738	0.000996661	0.00320338	-0.0038841	0.0634487	0.124456	0.153007	0.00705799	0.211334	0.119474	0.014889	0.37074	0.22441	0.00212173	0.060794	-1.15238	7.07088e-41	1.38856e-39	-1.28781	4.01103e-49	9.01466e-48	-0.496836	2.38692e-10	1.63763e-09	-0.119269	8.41608e-20	1.96523e-18	-0.25232	1.35542e-15	2.66174e-14	-0.110687	3.77769e-17	7.51711e-16	-0.562536	3.30598e-10	2.44308e-09	-1.16254	0.249809	0.408607	-0.447462	0.599435	0.864118
ENSMUSG00000002107	Celf2	0	-0.00727464	2.03673e-05	4.72188e-05	-0.0230087	8.34725e-08	1.29021e-06	0.00742516	0.0273461	0.0629838	-0.0362068	0.26493	0.953297	-0.104497	0.0213507	0.433235	-0.000543279	0.999675	0.999756	-0.82346	2.88029e-24	3.12527e-23	-0.544347	5.07366e-12	2.69642e-11	-0.349358	4.28952e-06	1.82862e-05	0.0434211	3.01234e-15	4.76053e-14	-0.0627804	3.55765e-12	4.71428e-11	-0.0653261	2.91241e-10	2.93668e-09	-1.54316	1.86823e-17	2.81858e-16	-0.555253	0.941601	0.968126	-0.277075	0.389025	0.734574
ENSMUSG00000002109	Ddb2	0	-0.00385565	0.00148823	0.00257511	0.00121933	0.570049	0.659451	0.000872811	0.727893	0.818265	0.00299246	0.748523	0.987144	0.00834788	0.236352	0.886854	0.0179243	0.305333	0.878387	-0.420298	0.180986	0.243434	-0.412957	0.203186	0.263245	-0.364065	0.166632	0.253311	-0.267493	0.530892	0.649402	-0.394469	0.916658	0.948483	-0.33026	0.738366	0.827553	-0.210013	0.509305	0.6131	-0.351007	0.683044	0.796863	-0.331835	0.376906	0.724247
ENSMUSG00000002129	Sf3a1	0	0.00392142	8.52254e-05	0.000179391	-0.00986566	4.00668e-06	3.25176e-05	0.00137712	0.481206	0.609663	-0.000311861	0.987056	0.997971	-0.016261	0.682265	0.986893	-0.0526731	0.273136	0.850497	0.443472	5.96621e-14	3.75561e-13	0.221771	0.000248763	0.000588918	0.11785	0.0464793	0.0861882	-0.0570453	2.18394e-09	1.87403e-08	0.0625651	3.42428e-06	2.07378e-05	0.067467	4.42584e-05	0.000214384	-0.261472	1.15162e-08	7.14781e-08	-0.354809	1.32651e-11	3.85685e-10	0.140912	0.725846	0.915936
ENSMUSG00000002205	Vrk3	0	-0.00357215	0.0026	0.00434064	-0.00197554	0.352526	0.453199	-0.000883131	0.72142	0.813691	-0.0296904	0.184273	0.904894	-0.0274853	0.139795	0.815156	-0.413469	0.00210436	0.0604411	-0.352408	0.0111119	0.0201834	-0.741143	4.6897e-07	1.58159e-06	-0.431187	0.0014595	0.00402471	-0.342161	0.953018	0.970435	-0.24463	0.537885	0.663214	0.301229	0.00153301	0.00520815	-0.169217	0.00317564	0.00810937	-0.239136	0.00521867	0.0211412	-0.336276	0.253206	0.612582
ENSMUSG00000002210	Smg9	0	0.00923019	8.34725e-08	2.94787e-07	-0.0171473	8.34725e-08	1.29021e-06	0.00983088	0.000134474	0.000720423	-0.0260105	0.163014	0.882373	-0.0182213	0.22329	0.88613	-0.0783706	0.0583252	0.489053	0.670403	1.40265e-05	4.12429e-05	0.474972	0.00195785	0.00398726	0.148222	0.323002	0.431883	-0.0289989	0.00102665	0.00346137	0.0157367	0.00194362	0.00652906	0.221797	0.0498041	0.104002	-0.846917	4.84303e-08	2.804e-07	-0.0877348	0.00530552	0.021435	0.0707873	0.312422	0.66854
ENSMUSG00000002221	Paxip1	0	-0.00872121	8.34725e-08	2.94787e-07	0.00527827	0.0170232	0.0359079	-0.00148228	0.552163	0.673816	-0.0080578	0.645106	0.984555	0.0123483	0.392412	0.940905	0.0206419	0.534927	0.959534	-0.584409	0.000638915	0.00146817	-0.643387	0.000199827	0.000480765	-0.487031	0.00265751	0.00694011	0.33899	4.97542e-05	0.000225931	-0.27404	0.122402	0.215784	-0.044299	0.0209729	0.0501867	0.25318	0.000104279	0.00036239	-0.554029	0.596229	0.732648	-0.167428	0.0192397	0.146424
ENSMUSG00000002222	Rmnd5a	0	0.00459363	0.000588648	0.001085	-0.000459799	0.842962	0.884922	-0.00739965	0.00970075	0.0267692	0.00230592	0.891516	0.994332	0.00274014	0.833251	0.997038	-0.0287738	0.347981	0.902186	0.543504	0.00307381	0.00622294	0.234032	0.204212	0.264346	0.493159	0.00532161	0.0129279	0.195502	0.12125	0.211542	0.0823008	0.040364	0.086964	-0.069524	0.0211994	0.050688	0.341086	0.645742	0.732722	0.0920938	0.426002	0.591251	0.447192	0.508805	0.82054
ENSMUSG00000002227	Mov10	0	-0.018794	8.34725e-08	2.94787e-07	0.020116	4.17362e-07	4.71659e-06	0.016793	3.43907e-05	0.000227983	-0.00629664	0.701787	0.986299	-0.00358556	0.784735	0.993002	0.0117782	0.705438	0.987532	-2.65189	4.48029e-24	4.80909e-23	-1.11134	9.4027e-08	3.42459e-07	-2.01272	1.92544e-18	2.4537e-17	-0.171344	2.13235e-14	3.14187e-13	-0.315213	4.14483e-13	6.17548e-12	-0.33036	2.17498e-11	2.51603e-10	0.404885	5.53018e-08	3.16815e-07	-0.312171	0.00128678	0.00651494	-1.8726	0.0807299	0.346443
ENSMUSG00000002233	Rhoc	0	0.0114772	8.34725e-08	2.94787e-07	0.00254196	0.10534	0.166632	0.00315561	0.0882755	0.162585	0.0264043	0.376883	0.975922	0.0371576	0.246238	0.89313	0.0663868	0.187317	0.776835	0.97585	3.40116e-67	1.31427e-65	0.933106	2.04607e-61	6.1122e-60	0.513405	1.76485e-19	2.37541e-18	0.0321098	1.78496e-31	8.16109e-30	0.0337996	4.37106e-32	2.67147e-30	0.106849	1.55456e-22	4.44441e-21	0.42125	1.27519e-10	9.95794e-10	0.356956	2.98346e-13	1.05114e-11	0.215254	6.57293e-05	0.00215129
ENSMUSG00000002249	Tead3	0	0.00536754	0.00060626	0.00111489	0.0105982	0.000484558	0.00173528	0.010147	0.00296386	0.00990902	0.00243378	0.737638	0.987144	0.00886518	0.141966	0.817644	-0.00221102	0.872893	0.992809	0.596872	0.0623419	0.0952619	1.39093	0.000160649	0.000392096	-0.00272704	0.99156	0.99405	0.568803	0.908896	0.942329	0.34456	0.286118	0.419408	0.419577	0.52647	0.659133	0.748746	0.0812552	0.137363	1.09093	0.124487	0.250164	-0.0179056	0.678122	0.8969
ENSMUSG00000002250	Ppard	0	0.00121016	0.282085	0.328738	0.00238903	0.267632	0.361806	0.00392736	0.123533	0.21329	-0.00702597	0.599521	0.983241	-0.00122527	0.914403	0.997038	0.0123088	0.637387	0.975732	-0.132015	0.533507	0.608019	0.218415	0.298986	0.369042	-0.121031	0.527421	0.631987	-0.00531427	0.585541	0.696475	-0.350707	0.340411	0.476488	-0.492847	0.19348	0.31198	0.175644	0.876355	0.911985	0.108964	0.556048	0.701812	-0.07618	0.459183	0.788496
[truncated: 11,723 more rows]

## Sheet: 3 - All Myoblasts Norm Counts
Gene_ID	Gene_symbol	Blasts_DMSO_Luc_1	Blasts_DMSO_Luc_2	Blasts_DMSO_Luc_3	Blasts_Pier_Luc_1	Blasts_Pier_Luc_2	Blasts_Pier_Luc_3	Blasts_Anti_Luc_1	Blasts_Anti_Luc_2	Blasts_Anti_Luc_3	Blasts_Oligo_Luc_1	Blasts_Oligo_Luc_2	Blasts_Oligo_Luc_3	Blasts_DMSO_Lb_1	Blasts_DMSO_Lb_2	Blasts_DMSO_Lb_3	Blasts_Pier_Lb_1	Blasts_Pier_Lb_2	Blasts_Pier_Lb_3	Blasts_Anti_Lb_1	Blasts_Anti_Lb_2	Blasts_Anti_Lb_3	Blasts_Oligo_Lb_1	Blasts_Oligo_Lb_2	Blasts_Oligo_Lb_3	Blasts_DMSO_mLb_1	Blasts_DMSO_mLb_2	Blasts_DMSO_mLb_3	Blasts_Pier_mLb_1	Blasts_Pier_mLb_2	Blasts_Pier_mLb_3	Blasts_Anti_mLb_1	Blasts_Anti_mLb_2	Blasts_Anti_mLb_3	Blasts_DMSO_NDI1_1	Blasts_DMSO_NDI1_2	Blasts_Pier_NDI1_1	Blasts_Pier_NDI1_2
[truncated: 11,979 more rows]

[truncated: 4 more sheets: 4 - Untrans. Myotubes PCA & DE, 5 - GFP-vs-Lb Myotubes DE, 6 - Myotubes Norm Counts, Tab & Column definitions]
