# Supplementary material for: Distinct mitochondrial defects trigger the integrated stress response depending on the metabolic state of the cell
Source: eLife. 2020 May 28;9:e49178. doi: 10.7554/eLife.49178 (PMC7255802; doi:10.7554/eLife.49178)
Supplement: Supplementary file 2. — Related to Figure 2B and Figure 3F. [file elife-49178-supp2.xlsx]

## Sheet: 1 - PC1 Pos iRegulon TFBS
Motif id	AUC	NES	ClusterCode	Transcription factor	Target genes
taipale-NNATGAYGCAATN-ATF4-DBD	0.0443925	9.14064	M1	Atf4	Chac1,Herpud1,Nupr1,Gars,Creb5,Jun,Ddit3,Fgf21,Arhgef2,Got1,Fn1,Wars,Samd4,Aars,Hspa9,Pck2,Gpt2,Tars,Usp36,Anp32b,Atf3,Mmp19,Asns,Vldlr,Synpo2,Ubr4,Ghitm,E4f1,Ptp4a1,Inhba,Hmox1,Tnfaip3,Sgk1,Fibin,Serpinb2,Dusp16,Vps37b,Slc7a11,Tnfrsf21,Slc20a1,Lrrc8a,Slc30a9,Gys1,Zfp593,Plk3,Tubb3,Pole4,Gas5,Chpf,Atg2b,Klf7,Ccdc86,Ank2,Dusp10,Chd2,Trmt61b,Zyx,Ptgs2,Cdyl,Krt80,Gnpnat1
homer-M00001	0.0434778	8.91605	M2		Nupr1,Chac1,Herpud1,Gars,Slc7a11,Arhgef2,Ddit3,Fgf21,Atf3,Got1,Samd4,Wars,Tars,Creb5,Vldlr,Gpt2,Pck2,Asns,Aars,Klf7,Fn1,Pole4,Anp32b,Gadd45g,Hspa9,Ank2,Ubr4,Tnfaip3,Fibin,Usp36,Aldh18a1,F3,Prune2,Jun,Trib3,Mmp19,Ghitm,Plk3,Cdyl,Ptp4a1,Tsr1,Gtpbp2,Zyx,Txndc5,Bhlhe40,Synpo2,Ankrd1,Sesn2,Asb5,Hmox1
taipale-NGGATGATGCAATM-Atf4-DBD	0.0419987	8.55288	M1		Nupr1,Herpud1,Fgf21,Gars,Chac1,Got1,Creb5,Ddit3,Wars,Fn1,Jun,Aars,Samd4,Slc7a11,Arhgef2,Tars,Atf3,Usp36,Ghitm,Synpo2,Anp32b,Pck2,Hspa9,Trib3,Prune2,Ubr4,Vldlr,Pole4,Gpt2,Krt80,Fiz1,Gtpbp2,Slc20a1,Gys1,Trmt61b,Gnpnat1,Inhba,Asb5,Aldh18a1
flyfactorsurvey-Crc_CG6272_SANGER_5_FBgn0036126	0.0398385	8.02246	M3	Atf3,Creb1	Atf3,Creb5,Jun,Samd4,Herpud1,Nupr1,Chac1,Fn1,Anp32b,Sh2b3,Usp36,Ddit3,Slc7a11,Wars,Fgf21,Gars,Pck2,Inhba,Hspa9,Aars,Arhgef2,Tars,Ptp4a1,Zyx,Vps37b,Tnfaip3,Vldlr,Dusp10,Ptgs2,Chd2,Gadd45g,Plk3,Klf6,Cdyl,Per2,Chpf,Krt80,Ubr4,Zfp593,Gpt2,Gtpbp2,Trmt61b,Mmp19,Got1,Lrrc8a,Pmaip1,Tubb3,Sgk1,Asns,Tnfrsf21,Synpo2,Dusp8,Csrp1,Mcam,Gem,Ccdc86,Bhlhe40,Akirin1,Ppp1r15a,Gtpbp4,Dusp1,Ptrh1,Ghitm,Hmox1,Cnnm4,Cd…
homer-M00018	0.0392254	7.87193	M1		Slc7a11,Herpud1,Ddit3,Chac1,Mmp19,Atf3,Creb5,Nupr1,Hmox1,Jun,Vldlr,Fgf21,Samd4,Sgk1,Gars,Got1,Gpt2,Wars,Sesn2,Gys1,Tnfaip3,Gadd45g,Dusp10,Asns,Prune2,Anp32b,Pck2,Tars,Usp36,Ank2,Mib2,Sh2b3,Aars,Fn1,Krt80,Ptp4a1,Arhgef2,Hspa9,Bhlhe40,Ldlrad3,Plk3
factorbook-CREB	0.0357807	7.02613	M3	Atf3,Crem,Creb1	Herpud1,Vps37b,Slc7a11,Chac1,Jun,Atf3,Creb5,Usp36,Fn1,Gars,Ddit3,Samd4,Gpt2,Dusp16,Lrrc8a,Fgf21,Dusp8,Ubr4,Zfp593,E4f1,Hspa9,Ptp4a1,Dusp10,Aars,Wars,Trmt61b,Dusp1,Klf6,Nupr1,Taf4b,Got1,Chd2,Vldlr,Chpf,Inhba,Zbtb11,Plk3,Rheb,Fibin,Eif3c,Ier2,Epha2,Tubb3,Pck2,Gas5,Mrps18b,Tars,Slc20a1,Asns,Tnfaip3,Cry2,Gem,Arhgef2,Atg2b,Ghitm,Areg,Sh2b3,Ppp1r15a,Synpo2,Akirin1,Lrrfip1,Tnfrsf21,Krt80,Anp32b,Plekhh2,…
encode-UW.Motif.0036	0.0354109	6.93533	M2		Gars,Samd4,Nupr1,Creb5,Ddit3,Arhgef2,Fgf21,Jun,Inhba,Sh2b3,Wars,Slc7a11,Gadd45g,Ank2,Zyx,Asns,Chac1,Anp32b,Gpt2,Atf3,Herpud1,Klf7,Pck2,Tars
transfac_pro-M00514	0.0346032	6.73702	M3	Atf4,Atf3,Creb1,Crem,Atf1,Atf5,Atf2,Atf7,Atf6	Vps37b,Jun,Atf3,Gas5,Samd4,Cnnm4,Dusp8,Chac1,Relb,Tsc22d3,Areg,Fn1,Dusp1,Hspa9,Chpf,Gem,Akirin1,Sh2b3,Usp36,Epha2,Creb5,Has1,Herpud1,Ptrh1,E4f1,Lrrfip1,Ptp4a1,Ppp1r15a,Lrrc8a,Ghitm,Zfp593,Lmcd1,Rheb,Ccdc86,Inhba,Slc25a33,Ptgs2,Tom1,Klf7,Mcam,Ppp2r5b,Taf4b,Klf6,Trmt61a,Slc20a1,Xpot,Zbtb11,Sorbs1,Pmaip1,Gadd45a,Aars,Ddit3,Plk2,Gars,Anp32b,Synpo2,Riok2,Plekhh2,Mmp19,Nfe2l1,Tubb3,Prune2,Trmt61b,Ubr4,…
transfac_public-M00030	0.0329782	6.33801	M2		Samd4,Pck2,Slc7a11,Gadd45g,Sh2b3,Creb5,Tnfaip3,Asns,Gars,Zyx,Anp32b,Gpt2,Vldlr,Chd2,Ank2,Krt80,Dusp10,Nol9,Herpud1,Atf3
factorbook-CEBPB	0.0326278	6.252	M1	Cebpb,Cebpa,Cebpg,Cebpe,Cebpd,Ddit3	Herpud1,Gys1,Chac1,Ndrg1,Fn1,Nupr1,Ptgs2,Ankrd1,Gars,Ddit3,Trib3,Atf3,Mmp19,Got1,Nfil3,Hspa9,Creb5,Usp36,Ldlrad3,Fgf21,Slc7a11,Wars,Arhgef2,Hmox1,Aars,Ubr4,Synpo2,Sept8,Vldlr,Jun,Nfe2l1,Sgk1,Inhba,Ptp4a1,Rhob,Fgd3,Tars,Gpt2,Asb5,Ghitm,Fibin,Asns
swissregulon-CEBPA-B_DDIT3.p2	0.0311779	5.896	M4	Cebpa,Ddit3,Cebpb	Nupr1,Ddit3,Klf7,Herpud1,Arhgef2,Chac1,Trib3,Ankrd1,Gars,Fn1,Inhba,Asns,Wars,Creb5,Ghitm,Fgf21,Pck2,Vldlr,Hmox1,Slc7a11,Aars,Atf3,Sesn2,Gpt2,Rusc2,Bhlhe40,Mtss1l,Prune2,Prg4,Rsbn1,Samd4,Jun
transfac_pro-M01863	0.0303703	5.69769	M3	Atf3,Atf4,Crem,Creb1,Atf2,Atf5,Atf1,Atf7,Atf6	Vps37b,Creb5,Dusp1,Jun,Samd4,Atf3,Herpud1,Zyx,Inhba,Chac1,Chpf,Dusp8,Usp36,Gas5,Lrrc8a,Zfp593,Cnnm4,Gem,Klf6,F3,Ptrh1,Areg,Ddit3,Ppp1r15a,Fn1,Nupr1,Ccdc86,Has1,Ubr4,Dusp16,Epha2,Tsc22d3,Krt80,Sorbs1,Tubb3,Akirin1,Ppp2r5b,Csrp1,Pck2,Relb,Lrrfip1,Taf4b,Anp32b,Klf7,Hspa9,Aars,Ptp4a1,Chd2,Wars,Gars,Lmcd1,Fgf21,Dusp10,Rheb,Vldlr,Ier2,Zbtb11,Tnfrsf21
transfac_public-M00177	0.0299908	5.6045	M3	Creb1,Crem,Atf4,Atf2,Atf3,Atf1,Atf5,Atf7,Atf6	Vps37b,Dusp1,Usp36,Atf3,Lrrc8a,Chpf,Herpud1,Jun,Cnnm4,Has1,Ptp4a1,Fn1,Gem,Gas5,Akirin1,Epha2,Krt80,Dusp8,Hspa9,Zfp593,Zbtb11,Ppp1r15a,Mrps18b,Trmt61b,Relb,Ptrh1,Areg,Taf4b,Ccdc86,Lmcd1,Pmaip1,Slc25a33,Creb5,Chac1,Slc25a37,Nr4a1,Klf6,Plk3,E4f1,Sh2b3,Ghitm,Samd4,Tsc22d3,Cry2,Tnfrsf21,Anp32b,Ptgs2,Ier2,Mcam,Ppp2r5b,Ubr4,Tubb3,Cyr61,Synpo2,Arhgef2,Inhba,Lrrfip1,Slc20a1,Akap2,Trmt61a,Fibin,Ch25h,Aars,…
swissregulon-ATF4.p2	0.0284241	5.21983	M3	Atf4,Creb1,Crem,Atf2,Atf1,Atf3,Atf7,Atf5,Jdp2,E4f1,Atf6,Creb3,Xbp1	Vps37b,Dusp1,Gas5,Relb,Gem,Lrrc8a,Fn1,Akirin1,Epha2,Cnnm4,Chpf,Areg,Herpud1,Atf3,Dusp8,Ppp1r15a,Usp36,Zfp593,Slc25a33,Taf4b,Ptrh1,Tsc22d3,Has1,Creb5,Ptp4a1,Sorbs1,Ier2,Ghitm,Lmcd1,Hspa9,Chac1,Mmp19,Lrrfip1,Trmt61a,Zbtb11,Samd4,Ppp2r5b,Cry2,Trmt61b,Klf7,E4f1,Klf4,Mcam,Inhba,Slc25a37,Jun,Slc20a1,Pmaip1,Plk2,Ccdc86,Tubb3,Plk3,Dusp16,Plekhh2,Synpo2,Rheb,Cyr61,Xpot,Atg2b,Klf6,Tnfrsf21,Tom1,Mrps18b,Ch2…
transfac_pro-M01864	0.0275872	5.01435	M3	Atf4,Creb1,Crem,Atf2,Atf3	Vps37b,Dusp1,Samd4,Jun,Creb5,Krt80,Slc7a11,Usp36,Zfp593,Gas5,Dusp8,Chd2,Cnnm4,Chpf,Herpud1,Pck2,Klf6,Inhba,Ptrh1,Atf3,Ppp1r15a,Otub2,Gem,Has1,Sat1,Anp32b,Trmt61a,Areg,Lrrc8a,Tubb3,Lmcd1,Ccdc86,Ptp4a1,Sh2b3,Rheb,Zyx,Zbtb11,Klf7,Tsc22d3,Epha2,Nr4a1,Eprs,Relb,Gars,Mcam,Fgf21,Prune2,Slc20a1,Bhlhe40,Csrp1,Plk3,Taf4b,Chac1,Pmaip1,Akirin1,Trmt61b,Ythdf3,Cry2,Synpo2,Vldlr,E4f1,Fn1,Serpinb2,Ppp2r5b,Gpt2,R…

## Sheet: 2 - PC1 Neg iRegulon TFBS
Motif id	AUC	NES	ClusterCode	Transcription factor	Target genes
homer-M00028	0.0384564	8.46644	M1	E2f1,E2f7,Tfdp1,E2f4,E2f3,E2f2,E2f5	Mcm3,Mcm6,Topbp1,Mcm4,E2f2,Ung,Hells,E2f8,Msh3,Cdc6,Mcm5,Brms1l,Cxxc5,Rfc5,Hist1h2ah,Mxd3,Itga3,Peg3,Rfwd3,Cbx3,Hoxc10,Uhrf1,Mfap3l,Nfib,Six4,Tipin,Paqr4,Mastl,Fhod1,Hnrnpa2b1,Dscc1,Msh2,Spc25,Nrp1,Hist1h3i,Loxl3,Chek2,Clspn,Tcirg1,Cacnb3,Olfml3,Adamts5,Pbx1,Cdca7l,Zranb3,Sh3bp1,Arrb1,Alg6,Ccne2,Irf1,Cenpk,Cadm1,Bace1,Fut10,Vash2,Drg1,Flrt2,Mrpl18,Xpo1,Srd5a1,Far1,Adamts4,Map2k6,Apln,Ralgps2,Zc4h…
homer-M00032	0.0382726	8.41799	M1	E2f7,E2f1,E2f6	Mcm3,Mcm6,E2f8,Mcm4,Mxd3,Hells,Uhrf1,Topbp1,Brms1l,Fhod1,Msh3,Sh3bp1,Hnrnpa2b1,Mcm5,Cdc6,Msh2,Hist1h2ah,Six4,Tcf19,E2f2,Rfwd3,Paqr4,Zranb3,Plekhg2,Nrp1,Ccne2,Angpt1,Mrpl18,Ankle1,Dock11,Esco2,Rad51c,Pbx1,Mastl,Kcnk2,Ung,Cdca7l,Rnf145,Loxl3,Spc25,Pcdh18,Flrt2,Egr1,E2f7,Hoxc10,Asf1b,Arrb1,Olfml3,Cenpk,Sesn1,H2afy2,Dna2,Tbc1d8b,Chek2,Hist1h3i,Ttc21b,Rad54l,Tnrc6b,Prps2,Clspn,Dscc1,Psmd1,Peg3,Mdm1,Ma…
transfac_public-M00516	0.0366485	7.99007	M1	E2f1,E2f3,Tfdp1,E2f4,E2f7,E2f2,E2f5	Mcm6,Mcm4,E2f2,Topbp1,Mcm5,Cdc6,E2f8,Ung,Msh3,Mcm3,Hells,Hist1h2ah,Brms1l,Paqr4,Peg3,Uhrf1,Rfc5,Tipin,Cbx3,Hnrnpa2b1,Mrpl18,Chek2,Ect2,Nfib,Zranb3,Clspn,Cdca7l,Six4,Mxd3,Pcdh18,Nrp1,Olfml3,Itga3,Cxxc5,Rfwd3,Mat2a,Cenpk,Mastl,Tcirg1,Irf1,Hoxc10,Hist1h3i,Nek8,Snai1,Srrt,Dram1,Cdk2ap2,Fubp1,Asf1b,Lpar1,Atp10d,Map2k6,Sh3bp1,Srd5a1,Spc25,Cacnb3,Tcf7l2,Sc5d,Msh2,Dscc1,Fut10,Ccne1,Stim1,Adamts5,Amot,H2a…
transfac_pro-M00919	0.0361174	7.85012	M1	Tfdp1,E2f4,E2f1,E2f3,E2f7,E2f5,E2f2	Mcm6,E2f2,Cdc6,Mcm3,E2f8,Mcm4,Uhrf1,Hells,Mcm5,Ung,Topbp1,Msh3,Paqr4,Brms1l,Cxxc5,Hist1h2ah,Cbx3,Peg3,Zranb3,Irf1,Clspn,Dscc1,Nfib,Chek2,Adamts5,Rfc5,E2f7,Tipin,Olfml3,Six4,Cenpk,Mfap3l,Cdca7l,Sesn1,Hnrnpa2b1,Mrpl18,Ccne1,Rfwd3,Chst15,Cdk2ap2,Fhod1,Tcf19,Mat2a,Mastl,Atp10d,Sc5d,Snai1,Vash2,Sh3bp1,Itga3,Hoxc10,Ect2,Nrp1,Mxd3,Hspa8,Srd5a1,Tnrc6b,Msh2,Pcdh18,Ccne2,Pnpla6,Rad54l,Hist1h3i,Far1,Asf1b,A…
transfac_pro-M00920	0.0360255	7.8259	M1	Tfdp1,E2f1,E2f7,E2f3,E2f4,E2f5,E2f2	Mcm6,E2f2,Cdc6,E2f8,Mcm4,Mcm5,Topbp1,Mcm3,Hells,Msh3,Ung,Uhrf1,Paqr4,Peg3,Brms1l,Irf1,Cbx3,Zranb3,Hist1h2ah,Chek2,Rfc5,Tipin,Clspn,Rfwd3,Nrp1,Cdca7l,Cxxc5,Cdk2ap2,Chst15,Mrpl18,Olfml3,Nfib,Hoxc10,Asf1b,Six4,Tcf19,Dram1,Hnrnpa2b1,Sc5d,Mfap3l,Cenpk,Srd5a1,Fubp1,Ccne1,Cnpy4,Pcdh18,Adamts5,Drg1,Snai1,Msh2,Rad54l,Mastl,Pnpla6,Atp10d,E2f7,Far1,Ralgps2,Vash2,Fhod1,Dpysl2,Ect2,Lpar1,Dscc1,Tnrc6b,Hist1h3i…
transfac_pro-M00940	0.035147	7.59444	M1	E2f1,E2f2,E2f5,E2f4,E2f3,Tfdp1,E2f7,E2f6	Mcm3,Mcm6,E2f2,E2f8,Uhrf1,Mcm4,Hells,Hist1h2ah,Paqr4,Tcf19,Topbp1,Mcm5,Cdc6,Msh3,Brms1l,Ung,Mxd3,Fhod1,Cxxc5,Six4,Rfwd3,Mrpl18,Cnpy4,E2f7,Msh2,Clspn,Irf1,Sh3bp1,Sc5d,Mfap3l,Trerf1,Cdca7l,Cbx3,Psmd1,Adamts5,Nrp1,Tipin,Vash2,Tcf7l2,Chek2,Fubp1,Cdk2ap2,Fut10,Hnrnpa2b1,Rfc5,Dscc1,Ect2,Hist1h3i,S1pr2,Plekhg2,Chst15,Olfml3,Atp10d,Drg1,Cenpk,Bicc1,Cacnb3,Mastl,Hoxc10,Far1,Srd5a1,Zhx1,Zranb3,Ankle1,Egr1,…
homer-M00030	0.0349938	7.55407	M1	E2f4,E2f1,E2f6	Mcm3,E2f8,Mcm6,E2f2,Mcm4,Uhrf1,Hells,Mxd3,Topbp1,Brms1l,Fhod1,Cdc6,Egr1,Rfwd3,Six4,Hist1h2ah,Paqr4,Msh3,Tcf19,Trerf1,Sh3bp1,Mcm5,Msh2,Nrp1,Ung,Mrpl18,Zranb3,Hnrnpa2b1,E2f7,Ankle1,Psmd1,Kcnk2,Etv1,Irf1,Ttc21b,Mastl,Plekhg2,Ralgps2,Ccnf,Dars2,Ccne2,Rad51c,Cdca7l,Rfc5,Chek2,Rnf145,Marcks,Cxxc5,Arhgap19,Clspn,Asf1b,Hist1h1b,Loxl3,Nfib,Has2,Cenpk,Flrt2,Drg1,Dock11,Arrb1,Hspa8,Hist1h3i,Spc25,Cnpy4,Angp…
transfac_pro-M00740	0.0348917	7.52716	M1	E2f1,E2f2,E2f3,E2f5,E2f4,Tfdp1,E2f7	Mcm6,E2f2,Mcm3,Topbp1,Cdc6,E2f8,Hells,Paqr4,Uhrf1,Mcm5,Hist1h2ah,Mcm4,Msh3,Mrpl18,Ung,Cbx3,Olfml3,Mat2a,Brms1l,Ect2,Hnrnpa2b1,Mxd3,Tipin,Fhod1,Tnrc6b,Msh2,Nfib,Cxcr4,Snai1,Ankrd28,Cdca7l,Dscc1,Chek2,Rfc5,Cdk2ap2,Ttc21b,Psmd1,Dgcr8,Avpr1a,Cxxc5,Six4,Kcnk2,Cbx6,Hist1h3i,Vash2,Clspn,Dars2,Alcam,Synpo,Peg3,Fubp1,Mastl,Cnpy4,Hist1h1b,Rad51c,Asf1b,Pdk4,Itga3,Hist1h1c,Cacnb3,Sesn1,Tcirg1,Pms1,Irf1,Hspa8…
transfac_pro-M00738	0.0345342	7.43296	M1	E2f2,E2f5,E2f4,E2f1,E2f3,Tfdp1,E2f7	Mcm6,Mcm3,E2f2,Topbp1,E2f8,Cdc6,Hells,Paqr4,Uhrf1,Mcm5,Hist1h2ah,Mcm4,Mrpl18,Msh3,Ung,Cbx3,Brms1l,Olfml3,Mat2a,Mxd3,Fhod1,Ect2,Msh2,Tipin,Nfib,Tnrc6b,Rfc5,Chek2,Six4,Avpr1a,Dscc1,Cdca7l,Snai1,Vash2,Hnrnpa2b1,Hist1h3i,Psmd1,Cxcr4,Cbx6,Rad51c,Cnpy4,Kcnk2,Mastl,Tcirg1,Ankrd28,Ttc21b,Peg3,Hist1h1c,Dars2,Hist1h1b,S1pr2,Cdk2ap2,Itga3,Clspn,Fubp1,Zc4h2,Cenpk,Asf1b,Etv1,Cxxc5,Slc43a3,Mov10,Pdk4,Ccne2,Alc…
transfac_public-M00024	0.033952	7.27956	M1	E2f1	Mcm6,Mcm3,Mcm4,Topbp1,Brms1l,Hist1h2ah,Msh3,E2f2,Mcm5,Hells,Ung,E2f8,Tcirg1,Itga3,Rfc5,Mrpl18,Tcf19,Uhrf1,Hoxc10,Six4,Nrp1,Etv1,Elovl6,Id3,Dram1,Hist1h1c,Irf1,Map2k6,Nek8,Hist1h3i,Mastl,Trerf1,Srrt,Hgf,Xpo1,Spc25,Fubp1,Hist1h1b,Tcf7l2,Chek2,Rfwd3,Fam114a1,Cyp51,Cenpk,Fut10,Vash2,Hist2h3b,Hoxa7,Dock11,Rnf145,Pbx1,Ccl2,Avpr1a,Slc25a12,Mgp,Drg1,Pcdh18,E2f7,Dlg3,Dars2,Mdm1,Dscc1,Ttc21b,Cdca7l,Tnrc6b,…
taipale-TTTGGCGCCAAA-E2F1-DBD	0.0335025	7.16114	M2	E2f1,E2f2,E2f3	Mcm6,Mcm5,Topbp1,E2f2,Msh3,Olfml3,Ung,E2f8,Hist1h2ah,Chek2,Tipin,Cnpy4,Peg3,Cbx3,Mcm4,E2f7,Cdc6,Hnrnpa2b1,Mcm3,Brms1l,Mrpl18,Ect2
transfac_pro-M00739	0.0330838	7.05079	M1	E2f1,E2f2,E2f5,E2f3,E2f4	Mcm3,Mcm6,E2f2,E2f8,Hells,Topbp1,Mcm4,Uhrf1,Cdc6,Paqr4,Brms1l,Hist1h2ah,Mcm5,Ung,Mrpl18,Mxd3,Fhod1,Six4,Msh3,Ttc21b,Mat2a,Msh2,Nfib,Avpr1a,Hnrnpa2b1,Tcf19,Cxcr4,Olfml3,Kcnk2,Cbx6,Cbx3,Irf1,Cxxc5,Rad51c,Chek2,Xpo1,Ect2,Mastl,Nrp1,Clspn,S1pr2,Psmd1,Ccne2,Asf1b,Rfc5,Trerf1,Cenpk,Itga3,Prps2,Ankrd28,Cacnb3,Vash2,E2f7,Fam57a,Alg6,Snai1,Hoxc10,Dars2,Kif22,Zc4h2,Tnrc6b,Tipin,Dscc1,Cdca7l,Klf10,Cnpy4,His…
jaspar-PF0069.1	0.0329816	7.02388	M3	E2f1,E2f6,E2f8	Mcm3,E2f8,Mcm6,Topbp1,Brms1l,Mcm4,Uhrf1,Hist1h2ah,Cdc6,Mxd3,Mcm5,Msh2,Paqr4,Hells,Six4,Msh3,Fhod1,Ung,Mrpl18,Cbx3,Tcf7l2,Nfib,E2f2,Hnrnpa2b1,Sec16b,Dscc1,Rad51c,Hist1h3i,Chek2,Mastl,Tipin,Sh3bp1,Arhgap19,Rfwd3,Ccne2,S1pr2,Ttc21b,Dock11,Ptger4,Avpr1a,Fubp1,Lpar1,Loxl3,Dna2,Atp10d,Angptl4,Psmd1,Zhx1,Vash2,Tcirg1,Rilpl2,Pbx1,Tmem98,Itgb3,Cxxc5,Pcyox1,Atoh8,Stim1,Arhgap18,Cdca7l,Rnf145,Cacnb3,Ift74,I…
swissregulon-E2F1..5.p2	0.0329101	7.00504	M1	E2f3,E2f4,E2f5,E2f1,E2f2,Tfdp1,E2f7	Mcm6,Mcm3,E2f2,E2f8,Topbp1,Cdc6,Hells,Mcm5,Paqr4,Uhrf1,Hist1h2ah,Mcm4,Msh3,Cbx3,Mrpl18,Brms1l,Ung,Mxd3,Fhod1,Msh2,Tipin,Nfib,Dscc1,Cnpy4,Tnrc6b,Avpr1a,E2f7,Peg3,Nrp1,Mastl,Cxxc5,Six4,Dars2,Cdca7l,Chek2,Klf10,Rad51c,Hist1h3i,Clspn,Lpar1,Ccne1,Hnrnpa2b1,Setdb2,Vash2,Srrt,Prps2,Rfwd3,Ralgps2,Tcirg1,Zranb3,Pias3,Sesn1,Dnm3os,Esco2,Dock11,Bub1,Pygb,Kazald1,Hist1h1b,S1pr2,Fubp1,Capn1,Loxl3,Sh3bp1,Rfc5,…
transfac_public-M00050	0.0325016	6.89739	M1	E2f2,E2f4,E2f1,E2f5,E2f3,Tfdp1,E2f7	Mcm6,Mcm3,E2f2,E2f8,Topbp1,Hells,Cdc6,Paqr4,Mcm5,Uhrf1,Hist1h2ah,Mcm4,Mrpl18,Msh3,Brms1l,Ung,Cbx3,Nfib,Mxd3,Fhod1,Tipin,Avpr1a,Six4,Cdca7l,Msh2,Chek2,Rfc5,Mastl,Dscc1,Hist1h1b,Hist1h1c,Vash2,Cnpy4,Tcirg1,Cxxc5,Dars2,Irf1,Clspn,Ect2,Cacnb3,S1pr2,Olfml3,Tcf7l1,Xpo1,Tnrc6b,Zc4h2,Peg3,Hist1h3i,Fubp1,Etv1,Cenpk,Klf10,Islr,Srd5a1,Hnrnpa2b1,Hspa8,Nrp1,Map2k6,Mat2a,Mov10,Rad54l,Adamts5,Rad51c,Apln,Ccne2,…

## Sheet: 3 - PC1 Neg iRegulon ChIP-seq
Track id	AUC	NES	Transcription factor	Target genes
GSM1208730_batch2_chrom1_LoVo_E2F7_PassedQC_peaks_hg19	0.0506981	9.06145	E2F7	UNG,MCM5,E2F2,WDR76,MCM3,MCM4,MCM6,CDC6,MCM7,TK1,TIPIN,EGR1,RFC2,RECQL,DHFR,CDC45,HNRNPA2B1,CBX3,HELLS,RAD54L,MSH2,CYB5A,RFWD3,MSH6,TNFAIP8,E2F8,GMNN,ASF1B,PAQR4,GINS2,XPO1,CDCA7L,MXD3,JUNB,POLE2,EXO1,FHOD1,ID3,ID2,MAT2A,CCNE2,NEK8,FBXO5,MASTL,PMS1,CYP51A1,DSCC1,CNPY4,SEPT9,PIK3R3,HIST1H2AH,IDI1,HIST1H3A,PTPN6,MRPL18,TTC21B,CDKN3,ZRANB3,NMRAL1,FBXL15,CDK2AP2,UHRF1,CYP1B1,TAOK2,HIST1H1C,CLSPN,HSPA…
wgEncodeSydhTfbsHelas3E2f4StdPk.narrowPeak.gz	0.0413085	7.10151	E2F4	SPC25,SKA1,FAM111A,ESCO2,NUF2,C1orf112,AURKB,MCM3,DNA2,PBK,DGCR8,HIST1H3B,NDC80,NEIL3,NCAPH,CDKN2D,TK1,CDC45,RAD54B,MELK,SHCBP1,RAD54L,CENPK,DLGAP5,DEPDC1B,CDC6,NCAPG2,TCF19,BUB1,HELLS,CHAF1B,EXO1,RECQL,TOPBP1,ASF1B,MCM4,MSH2,WDR76,UHRF1,NCAPD3,KIF23,IFT74,MCM7,CHEK2,CLSPN,GINS2,DARS2,DCK,HMGB3,DSCC1,UNG,PAQR4,KAZALD1,FANCA,RAD51C,FBXO5,ARHGAP19,DEPDC1,RFWD3,RFC2,POLE2,GMNN,E2F8,DPYSL2,TMEM18,CCN…
GSM1208691_batch1_chrom1_LoVo_TFDP1_PassedQC_peaks_hg19	0.0361975	6.03468	TFDP1	MDM1,UNG,MCM5,NDC80,KIF23,EXO1,CENPK,RFC5,RECQL,CDKN2D,FBXO5,SKA1,RFWD3,MCM6,CDC6,AURKB,DNA2,NUF2,MCM7,ESCO2,CLSPN,ASF1B,MCM3,PBK,TK1,RFC2,SPC25,MSH2,GMNN,TIPIN,DLGAP5,CHEK2,ARHGAP19,NEIL3,XPO1,CDK2AP2,LRRCC1,RAD54B,CDKN3,RAD54L,MXD3,E2F2,KAZALD1,WDR76,BUB1,TAOK2,HIST1H1B,MRPL18,FHOD1,TYK2,MASTL,DARS2,RAD51C,ACAT2,HSPA8,CCNE2,HIST1H2AH,NCAPD3,CYB5A,ZRANB3,PTPN6,FMNL3,DHFR,PIK3R3,MELK,NCAPG2,IFT74…
wgEncodeSydhTfbsHepg2Srebp1InslnStdPk.narrowPeak.gz	0.032379	5.23762	SREBF1	LDLR,SCD,LSS,HSD17B7,ACAT2,STARD4,FDFT1,DHCR24,HMGCS1,CYP51A1,HMGCR,IFT74,MVD,IDI1,NSDHL,DHCR7
wgEncodeSydhTfbsHepg2Srebp2PravastStdPk.narrowPeak.gz	0.0285507	4.43852	SREBF2	HMGCR,HMGCS1,FDFT1,IDI1,CYP51A1,MVD,DHCR7,STARD4,LDLR,HSD17B7,LSS,SCD,DHCR24
wgEncodeSydhTfbsK562E2f4UcdPk.narrowPeak.gz	0.0278556	4.29342	E2F4	MCM7,NCAPG2,TK1,NEIL3,UNG,GINS2,SKA1,AURKB,SHCBP1,WDR76,RFC2,NUF2,ESCO2,MCM4,HMGB3,MSH6,PBK,MCM6,FANCA,E2F8,POLE2,UHRF1,ASF1B,MELK,DNA2,FAM111A,TMEM18,ARHGAP19,SPC25,TCF19,TIPIN,TOPBP1,CCNE1,NCAPH,MSH2,DEPDC1B,BUB1,RAD54L,OSBPL3,CLSPN,KIF23,EXO1,DSCC1,INSIG1,MCM5,RFC5,CDKN2D,CENPK,DCK,CBX3,FBXO5,PRKAR2B,MXD3,NCAPD3,HNRNPA2B1,DPYSL2,DEPDC1,SCD,CDKN3,FMNL3,PAQR4,CDKN2AIPNL,CDC6,NSDHL,FHOD1,LOXL3,HI…
wgEncodeHaibTfbsMcf7Foxm1sc502V0422111PkRep2.broadPeak.gz	0.0253784	3.77635	FOXM1	CDKN3,DYNLL1,KIF23,SEPT9,CCNF,NUF2,PTTG1,CBX3,HNRNPA2B1,MXD3,NCAPH,FBXO5,CDKN2D,RBL2,HIST1H3B,MGP,PIK3R3
wgEncodeSydhTfbsHelas3E2f1StdPk.narrowPeak.gz	0.0252511	3.74978	E2F1	FAM111A,C1orf112,DGCR8,EIF2AK2,DCK,RPA1,DPYSL2,FAM102B,CDCA7L,WDR76,UHRF1,CCNE1,FANCA,E2F7,TCF19,CCNE2,MCM4,NFIB,GNB4,MCM7,MCM3,NCAPH,TNFAIP8,RAD54L,CHAF1B,SLC25A12,KLF10,PARP16,DSCC1,CDC6,CNOT6,SLC9A3R1,PLSCR4,PSIP1,CENPK,DARS2,DHCR24,DEPDC1B,TOPBP1,ECHDC1,MBOAT1,ASF1B,DRAM1,NFIC,FMNL3,POLE2,HELLS,MSH2,FAM114A1,CNPY4,MSH6,TIPIN,ACAA2,HNRNPA2B1,TBL1XR1,ST5,ESCO2,IL4R,CLSPN,CBX3,CCNF,PMS1,MUM1,INS…
wgEncodeHaibTfbsPanc1Sin3ak20V0416101PkRep2.broadPeak.gz	0.0248987	3.67621	SIN3A	PLEKHG2,UNG,ZHX1,MCM7,NUF2,FBXO5,CDC6,HIST1H3B,EXO1,HELLS,DEPDC1,NCAPD3,E2F8,SHCBP1,DYNLL1,KAZALD1,MCM4,RAD54L,KIF23,CCNE2,HIST1H3I,CLSPN,TOPBP1,DARS2,HIST1H1C,AURKB,BUB1,NCAPH,STXBP4,DSCC1,TK1,RFC5,HIST1H1B,CCDC82,WIPI1,DLGAP5,DNA2,SKA1,TCF19
wgEncodeSydhTfbsHelas3Gcn5StdPk.narrowPeak.gz	0.0241937	3.52906	KAT2A	SLC16A3,GINS2,UHRF1,DGCR8,HIST1H1B,HNRNPA2B1,HSPA1B,MCM6,RFC5,JUNB,RPA1,HSPA8,MCM4,WDR76,CLSPN,TMEM199,GCDH,TMEM18,FANCA,TCF19,KLF10,CYP1B1,RFC2
wgEncodeSydhTfbsGm12878E2f4IggmusPk.narrowPeak.gz	0.0241643	3.52293	E2F4	NCAPG2,KLF10,UNG,DEPDC1B,RAD54L,AURKB,HMGB3,FANCA,GINS2,DLGAP5,ASF1B,KIF23,MCM7,ESCO2,DSCC1,TK1,CDKN3,SPC25,SKA1,CDKN2D,UHRF1,KAZALD1,NEIL3,FBXO5,BUB1,CLSPN,NCAPH,SHCBP1,PAPSS1,EXO1,PBK,DNA2,E2F8,MSH2,POLE2,NDC80,ERCC6L,CDC6,FN3KRP,C1orf112,MCM5,DEPDC1,FAM111A,ARHGAP19,CENPK,CDK2AP2,RECQL,MXD3,NUF2,TCF19,MELK,CKS2,IFT74,DCK,E2F7,KIF22,SLC43A3,XPO1,ST6GAL1,TOPBP1,MCM3,MCM4,SFPQ,EGR1,WDR76,CCNE2,CD…
wgEncodeHaibTfbsEcc1Foxm1sc502V0422111PkRep2.broadPeak.gz	0.0239196	3.47183	FOXM1	CDKN3,CCNF,MXD3,NCAPH,DYNLL1,NUF2,PTTG1,KIF23,TNFAIP8L1,CDKN2D,HNRNPA2B1,CBX3,UHRF1,SFPQ,BUB1,AURKB,NEIL3,FBXO5,TK1,PIK3R3,DARS2,DLGAP5,E2F2,ASF1B,FDFT1,NDC80,DEPDC1,RFWD3,PBK,ARHGAP19,HIST1H3B,CYP1B1,EMP1,CHEK2,CDK2AP2,NCBP2,LDLR,ESCO2,HMGB3,KBTBD4,STARD4,KIF22,E2F8,E2F7,TJP2,CXXC5,SEPT9
wgEncodeHaibTfbsSknshFoxm1sc502V0422111PkRep2.broadPeak.gz	0.0235671	3.39826	FOXM1	CDKN3,CCNF,CDKN2D,PTTG1,NUF2,KIF23,DYNLL1,TNFAIP8L1,MXD3,HIST1H3B,NCAPH,DEPDC1,KCNK2,SFPQ,ANKRD28,PBK
wgEncodeHaibTfbsMcf7Foxm1sc502V0422111PkRep1.broadPeak.gz	0.0235573	3.39622	FOXM1	CDKN3,DYNLL1,KIF23,CCNF,PTTG1,NUF2,CDKN2D,NCAPH,MXD3,TNFAIP8L1,FBXO5,SEPT9,SFPQ,DARS2,KLF10,HIST1H3B,CYP1B1,AURKB,MCM7,HNRNPA2B1,CBX3,PBK,JUP,PIK3R3,CHEK2,DEPDC1B,HMGB3,DEPDC1,UHRF1,NEIL3,RBL2,DLGAP5,HEBP2,TDRD7,HIST1H3A,NCAPG2,PFKM
wgEncodeSydhTfbsHelas3Hae2f1StdPk.narrowPeak.gz	0.0233713	3.35739	E2F1	FAM111A,DCK,CCNE1,DGCR8,DPYSL2,RPA1,EIF2AK2,WDR76,UHRF1,FANCA,CDCA7L,NFIB,E2F7,GNB4,C1orf112,CCNE2,SLC25A12,MBOAT1,TNFAIP8,NCAPH,TCF19,FAM102B,MCM4,DEPDC1B,IRF1,NFIC,CAPRIN2,MCM7,FAM114A1,ADAMTS10,PLSCR4,CENPK,RAD54L,MSH6,PSIP1,TNRC6B,IL4R,MUM1,INSIG1,DRAM1,SLC9A3R1,TBL1XR1,PMS1,XPO1,IDI1,SETDB2,KCTD7,PARP16,DSCC1,E2F8,DHCR24,ASF1B,FMNL3,POLE2,BICC1,MSH2,KLF10,MAT2A,EVC,TAOK2,CBX3,CCNF,ID3,SEPT9,…

## Sheet: 4 - PC2 Pos iRegulon TFBS
Motif id	AUC	NES	ClusterCode	Transcription factor	Target genes
homer-M00138	0.0181303	5.21511	M1	Trp53,Hic1,Hand2,Max,Usf2,Tcf12,Mxi1,Myf6,Myog,Mitf,Tal1,Hand1,Tfeb,Nhlh1,Mxd4,Myc,Myf5,Arid5b,Mxd1,Tal2,Tcf4,Mxd3,Tcf3,Bhlhe41,Mycs,Zbtb14	Trp53inp1,Zfp365,Cdkn1a,Pdia5,Prepl,Ddit4,Pltp,Anxa8,Adrb2,Mtmr11,Serpine1,Gjb4,Tef,Slc5a3,Rela,Ces2g,Rusc2,Dmpk,Jph2,Pmaip1,Ifi30,Pitpnm1,Gdf15,P2rx4,Fam83h,Ndrg4,Abhd14b,Eif2d,Hook2,Plin4,Vkorc1,Mmp23,Wbp1,Rab11fip1,Tinf2,Vasn
tfdimers-MD00343	0.017946	5.14722	M1	Hic1,Trp53,Trp63,Trp73,Hand2,Max,Usf2,Tcf12,Myf6,Myog,Mxi1,Mitf,Tfeb,Tal1,Hand1,Mxd4,Nhlh1,Myc,Myf5,Arid5b,Mxd1,Tal2,Tcf4,Mxd3,Tcf3,Bhlhe41,Mycs,Zbtb14,Smad3,Myb,Nkx2-1,Nr3c1	Trp53inp1,Zfp365,Pdia5,Cdkn1a,Gjb4,Ddit4,Serpine1,Anxa8,Jph2,Ces2g,Pmaip1,Tef,Rab11fip1,Plin4,Adrb2,Vasn,Prepl,Mknk2,Rusc2,Gdf15,Eif2d,Fam83h,Isyna1,Kifc3,Usp21,Pitpnm1,Tagln,Slc5a3,Tinf2,Pltp,Tinagl1,Gps2,Rdh5,Hook2,Brms1l
homer-M00124	0.0172191	4.87944	M2	Nfya,Nfyb,Nfyc,Pole3,Gm21827	Pgp,Agfg2,Rassf7,Rbm4,Slc25a42,Mmab,Ficd,Trafd1,Aldh4a1,Fam46b,Slc2a8,Chtf18,Elk1,Hmg20b,Rbm14,Hspa1b,Ddt,Qpctl,F11r,Wbp1,Abca7,Tbc1d10a,Pcsk4,Gcdh,Slc19a2,Lrrc45,Gpr180,Grcc10,Rogdi,Triobp,Fam160a2,Gjb4,Zdhhc24,Ndrg4,Tob1,Tcf19,Hspa2,Ckb,Ccnl2,Zfp574,Slc26a2,Frmd8,Tef,Ddit4,Phf1,Mylip,Relb,Stard7,Tusc2,Hes6,Dag1,Abhd12,Limd2,Adrb2,Lmcd1,Slc35a2,Mpzl1,Fdxr,Pim2,Cbx8,Stx6,Dcxr,Bag4,Arvcf,Ccdc85b,A…
taipale-GRCCACGCCCWNNNN-Klf12-DBD	0.016738	4.70218	M3	Klf7,Klf4,Klf6,Klf12,Klf3,Klf15,Klf14,Klf17,Zfp352,Sp8,Sp9,Sp6,Sp7,Sp5,Klf13	Ccdc107,Thoc6,Sgms1,Tsen34,Ddit4,Ndufaf3,Tom1,Cbx8,Tuft1,Rell1,Tbc1d2,Hspb2,Cryab,Mtmr11,Vkorc1,Abhd4,Dnajb1,Rab11fip1,Pcsk4,Hspa2,Abhd8,Anxa8,Ptrh1,Ndufv3,Fam160a2,Gjb4,Cep68,Gmip,Hpse,Snta1,Tbc1d10a,Slc2a8,Tcta,Polg2,Dag1,B3galt4,Xpc,Fam129b,Psrc1,Tuba4a,Phf1,Hook2,Ficd,Vasn,Serpine1,Sync,Bckdk,Lmcd1,Isyna1,Qpctl,Tinf2,Ppp2r5b,Bag4,Stx6,Trafd1,Gga2,Zdhhc12,Fam46b,Fdxr,Cercam,Zfp593,Ccdc85b,Gdf1…
transfac_pro-M00375	0.0165332	4.62675	M4	Atf1,Usf1,Usf2,Creb3l1,Creb3l2	Amdhd2,Dusp1,Dvl2,Relb,Cbx8,Bcl6,Mlf2,Mcoln1
transfac_pro-M01651	0.0163285	4.55132	M1	Trp53,Trp63,Trp73,Irx4,Zbtb14,Hand2,Max,Usf2,Tcf12,Mxi1,Myog,Myf6,Mitf,Tal1,Tfeb,Hand1,Mxd4,Nhlh1,Myc,Myf5,Mxd1,Arid5b,Tal2,Tcf4,Mxd3,Tcf3,Bhlhe41,Mycs,Hic1,Nkx2-1,Myb,Nr3c1	Cdkn1a,Adrb2,Serpine1,Pltp,Ddit4,Morc4,Abcb1b,Zfp365,Gdf15,Wbp1
transfac_pro-M00376	0.0162773	4.53246	M4	Bhlhe40	Amdhd2,Dvl2,Dusp1,Cbx8,Relb,Mcoln1,Bcl6,Stx6,Mlf2,Zfp593,Slc35b2
jaspar-MA0060.1	0.0160214	4.43818	M2	Nfya,Nfyb,Nfyc,Ybx1,Pole3,Gm21827,Pole4	Agfg2,Pgp,Mmab,Fam46b,Slc25a42,Aldh4a1,Rbm4,F11r,Rbm14,Wbp1,Ficd,Slc2a8,Elk1,Hspa1b,Slc19a2,Chtf18,Grcc10,Zfp574,Trafd1,Ddt,Gcdh,Hmg20b,Gpr180,Ddit4,Abca7,Pcsk4,Zdhhc24,Rogdi,Qpctl,Mylip,Rassf7,Fam160a2,Tbc1d10a,Tef,Tusc2,Acot8,Tob1,Porcn,Arvcf,Stard7,Lrrc45,Hspa2,Ndrg4,Phf1,Fdxr,Sgms1,Ccnl2,Gjb4,Ckb,Cbx8,Tpst1,Psrc1,Triobp,Brms1l,Stx6,Tcf19,Pim2,Dag1,Frmd8,Lmcd1,Hes6,Arc,Slc35a2,Relb,Bag4,Tbc1d2…
transfac_public-M00287	0.0160214	4.43818	M2	Nfya,Nfyb,Nfyc,Ybx1,Pole3,Gm21827,Pole4	Agfg2,Pgp,Mmab,Slc25a42,Fam46b,Aldh4a1,Rbm4,F11r,Wbp1,Rbm14,Ficd,Slc2a8,Elk1,Hspa1b,Slc19a2,Trafd1,Zfp574,Chtf18,Grcc10,Ddt,Gcdh,Ddit4,Gpr180,Hmg20b,Abca7,Qpctl,Zdhhc24,Rogdi,Pcsk4,Rassf7,Mylip,Tef,Tbc1d10a,Ndrg4,Fam160a2,Lrrc45,Stard7,Tusc2,Acot8,Ckb,Porcn,Tob1,Cbx8,Arvcf,Hspa2,Phf1,Fdxr,Ccnl2,Triobp,Gjb4,Sgms1,Tpst1,Frmd8,Stx6,Psrc1,Dag1,Lmcd1,Tcf19,Pim2,Brms1l,Slc35a2,Relb,Tprn,Arc,Hes6,Ccdc85…
elemento-CTTATCG	0.0157347	4.33257	M5		Wnt9a,Limd2,Foxo3,Ddit4,Csrnp2,Enc1,Fam46b,Plin4,Pcsk4,Fam57a,Tuba4a,Isyna1,Ssbp4,Snta1,Fstl3,Crlf3,Ficd,Sorbs3,Zdhhc24,Rnf31,Htatsf1,Hspa2,Pmaip1,Slc5a3,Sgms1,Actn3,Slc35a2,Rab11fip1,Mlf2,Tmem151a,Hspb6,Mylip
jaspar-PF0046.1	0.0157143	4.32503	M6		Pgp,Ficd,Tef,Lmcd1,Wbp1,Dag1,Rbm14,Bag4,Slc26a2,Mylip,Rassf7,Hmg20b,Phf1,Fam160a2,Ndrg4,Ddt,Slc2a8,Grcc10,Ptpdc1,AI413582,Slc25a42,Slc25a1,Tbc1d10a,Pcsk4,Tbc1d2,Limd2,Pim2,Hes6,Lrrc45,Ccdc85b,Agfg2,Fdxr
taipale-RACATGYCNNGRCATGTY-Tp53-DBD	0.0155197	4.25337	M1	Trp53,Trp63,Hic1,Hand2,Max,Usf2,Tcf4,Tcf12,Myog,Mxi1,Myf6,Tal1,Mitf,Hand1,Mxd4,Nhlh1,Myc,Myf5,Arid5b,Mxd1,Tal2,Mxd3,Tfeb,Tcf3,Bhlhe41,Mycs,Zbtb14,Irx4,Smad3,Nkx2-1	Cdkn1a,Serpine1,Adrb2,Pmaip1,Wbp1,Pltp,Abcb1b,Gdf15,Zfp365,Ddit4,Jph2,Llgl1,Vasn,Psrc1,Kifc3,Inpp4a,Gpr180,Csrnp2,Tef,Acadvl,Eif2d,Trp53inp1,Hook2,Ifi30,Armcx5,Tinf2
transfac_pro-M00944	0.0155197	4.25337	M4	Usf1,Usf2,Myc,Max,Creb3l1,Creb3l2	Amdhd2,Dusp1,Dvl2,Relb,Mcoln1,Mlf2,Zfp593,Bcl6,Slc35b2,Cbx8
transfac_pro-M00370	0.0154993	4.24583	M4	Usf2,Usf1,Max,Myc,Arnt2,Creb3l2,Creb3l1	Amdhd2,Dvl2,Dusp1,Relb,Mcoln1,Bcl6,Slc35b2,Mlf2,Cbx8,Zfp593
transfac_pro-M00371	0.0154686	4.23451	M4	Usf2,Usf1,Max,Myc,Mycn,Arnt,Arnt2,Mycs,Creb3l1,Creb3l2	Amdhd2,Dvl2,Dusp1,Relb,Cbx8,Mcoln1,Bcl6,Slc35b2

## Sheet: Tab & Column definitions
Tab 1 - PC1 Pos iRegulon TFBS	iRegulon analysis for enrichment of transcription factor binding site (TFBS) motifs in promoter regions; Related to Fig. 2B
Motif id	Positional weight matrix (PWM) motif identifier as appears in the original publication or database	Input gene set: Top 500 genes with the most positive PC1 weights among genes associated with PC1 (p-value < 0.01). Input IDs: Mus musculus, MGI symbols. Motif collection: 10K (9,713 PWMs). Motif ranking database: 500bp upstream (7 species). Results shown: Top 15 motifs by NES.
AUC	Area under the cumulative recovery curve of ranked genes with this motif in their promoter region among the input gene set
NES	Normalized enrichment score reflecting how the AUC of this motif compares to the overall AUC distribution across all motifs
ClusterCode	Motif cluster identifier relating motifs with high sequence similarity
Transcription factor	Annotated or inferred transcription factor associated with the motif
Target genes	Genes with this motif identified in their promoter region found in the input gene set
Tab 2 - PC1 Neg iRegulon TFBS	iRegulon analysis for enrichment of transcription factor binding site (TFBS) motifs in promoter regions; Related to Fig. 2B
Motif id	Positional weight matrix (PWM) motif identifier as appears in the original publication or database	Input gene set: Top 500 genes with the most negative PC1 weights among genes associated with PC1 (p-value < 0.01). Input IDs: Mus musculus, MGI symbols. Motif collection: 10K (9,713 PWMs). Motif ranking database: 500bp upstream (7 species). Results shown: Top 15 motifs by NES.
AUC	Area under the cumulative recovery curve of ranked genes with this motif in their promoter region among the input gene set
NES	Normalized enrichment score reflecting how the AUC of this motif compares to the overall AUC distribution across all motifs
ClusterCode	Motif cluster identifier relating motifs with high sequence similarity
Transcription factor	Annotated or inferred transcription factor associated with the motif
Target genes	Genes with this motif identified in their promoter region found in the input gene set
Tab 3 - PC1 Neg iRegulon ChIP-seq	iRegulon analysis for enrichment of ChIP-seq binding peaks in promoter regions; Related to Fig. 2B
Track id	ChIP-seq track identifier as appears in the original publication or database	Input gene set: Top 500 genes with the most negative PC1 weights among genes associated with PC1 (p-value < 0.01). Input IDs: Homo sapiens, HGNC symbols. Track collection: 1,120 ChIP-seq tracks (ENCODE raw signals). Track ranking database: 500bp upstream. Results shown: Top 15 tracks by NES.
AUC	Area under the cumulative recovery curve of ranked genes with ChIP-seq peaks from this track in their promoter region among the input gene set
NES	Normalized enrichment score reflecting how the AUC of this track compares to the overall AUC distribution across all tracks
Transcription factor	Transcription factor associated with the ChIP-seq track
Target genes	Genes with ChIP-seq peaks identified in their promoter region found in the input gene set
Tab 4 - PC2 Pos iRegulon TFBS	iRegulon analysis for enrichment of transcription factor binding site (TFBS) motifs in promoter regions; Related to Fig. 3F
Motif id	Positional weight matrix (PWM) motif identifier as appears in the original publication or database	Input gene set: Top 500 genes with the most positive PC2 weights among genes associated with PC2 (p-value < 0.0001). Input IDs: Mus musculus, MGI symbols. Motif collection: 10K (9,713 PWMs). Motif ranking database: 500bp upstream (7 species). Results shown: Top 15 motifs by NES.
AUC	Area under the cumulative recovery curve of ranked genes with this motif in their promoter region among the input gene set
NES	Normalized enrichment score reflecting how the AUC of this motif compares to the overall AUC distribution across all motifs
ClusterCode	Motif cluster identifier relating motifs with high sequence similarity
Transcription factor	Annotated or inferred transcription factor associated with the motif
Target genes	Genes with this motif identified in their promoter region found in the input gene set
